# Supplementary material for: Comparative metagenomics at Solfatara and Pisciarelli hydrothermal systems in Italy reveal that ecological differences across substrates are not ubiquitous
Source: Front Microbiol. 2023 Feb 1;14:1066406. doi: 10.3389/fmicb.2023.1066406 (PMC9930910; doi:10.3389/fmicb.2023.1066406)
Supplement: Supplementary file 5 [file Table_1.xlsx]

## Sheet: Title and Author names
Comparative Metagenomics at Solfatara and Pisciarelli Hydrothermal Systems in Italy Reveal that Ecological Differences Across Substrates are not Ubiquitous
Ifeoma R. Ugwuanyi1*, Marilyn L. Fogel2, Roxane Bowden3, Andrew Steele3, Giuseppe De Natale4,5, Claudia Troise4,5, Renato Somma4,6, Monica Piochi4, Angela Mormone4 and Mihaela Glamoclija1*
1Department of Earth and Environmental Sciences, Rutgers University, Newark, NJ, United States.
2EDGE Institute, University of California, Riverside, CA, United States.
3Earth and Planets Laboratory, Carnegie Institution for Science, Washington DC, United States.
4Istituto Nazionale di Geofisica e Vulcanologia, Osservatorio Vesuviano, Naples, Italy
5 Consiglio Nazionale delle Ricerche INO, Naples, Italy.
6 Consiglio Nazionale delle Ricerche IRISS, Naples, Italy.
*Correspondence:
Mihaela Glamoclija
m.glamoclija@rutgers.edu
Ifeoma R. Ugwuanyi
ifeoma.ugwuanyi@rutgers.edu
Table of Content
Supplementary Table 1 Bulk elemental composition of mud and fumarolic deposit samples from Solfatara and Pisciarelli. Samples collected from Pisciarelli large pool are denoted by PLP, Pisciarelli small pool by PSP, Pisciarelli fumarole by PF, Solfatara mud pool by SMP, and Solfatara fumarole by SF. M represents mud, MO for mud outlet, E for epilithic microbial layer from dry mud wall, and D for d…
Supplementary Table 2 Anion and cation concentrations in Solfatara and Pisciarelli hydrothermal systems. Samples collected from Pisciarelli large pool are denoted by PLP, Pisciarelli small pool by PSP, Pisciarelli fumarole by PF, Solfatara mud pool by SMP, and Solfatara fumarole by SF. W represents water, M for mud, MO for mud outlet, E for epilithic microbial layer from dry mud wall, and D for d…
Supplementary Table 3 Total and organic δ13C, δ15N, and δ34S isotopic composition of water (W), mud (M), mud outlet (MO), epilithic microbial layer from dry mud wall (E), and fumarolic deposit (D) samples from Solfatara and Pisciarelli. PF-D2_1 (gray fumarolic deposit), PF-D2_1 (yellow fumarolic deposit), PLP-E_1 (green epilithic microbial layer), PLP-E_2 (green epilithic microbial layer), SMP-M_…
Supplementary Table 4 List of contaminants removed owing to their identification as molecular biology kit and/or laboratory contaminants. Samples collected from Pisciarelli large pool are denoted by PLP, Pisciarelli small pool by PSP, Pisciarelli fumarole by PF, Solfatara mud pool by SMP, and Solfatara fumarole by SF. W represents water, M for mud, MO for mud outlet, E for green epilithic microbi…
Supplementary Table 5 List of removed singletons and species only present in one sample. Samples collected from Pisciarelli large pool are denoted by PLP, Pisciarelli small pool by PSP, Pisciarelli fumarole by PF, Solfatara mud pool by SMP, and Solfatara fumarole by SF. W represents water, M for mud, MO for mud outlet, E for green epilithic microbial layer from dry mud wall, and D for deposit sam…
Supplementary Table 6 List of species in Solfatara and Pisciarelli after contaminants, singletons and species occuring in only one sample were removed. Samples collected from Pisciarelli large pool are denoted by PLP, Pisciarelli small pool by PSP, Pisciarelli fumarole by PF, Solfatara mud pool by SMP, and Solfatara fumarole by SF. W represents water, M for mud, MO for mud outlet, E for green epi…
Supplementary Table 7 Taxonomy table generated from metagenome-derived 16S rRNA profiling. Taxonomy was assigned using the Greengenes database. Samples collected from Pisciarelli large pool are denoted by PLP, Pisciarelli small pool by PSP, Pisciarelli fumarole by PF, Solfatara mud pool by SMP, and Solfatara fumarole by SF. W represents water, M for mud, MO for mud outlet, E for green epilithic m…
Supplementary Table 8 Alpha diversity indices calculated for Solfatara and Pisciarelli samples. Samples collected from Pisciarelli large pool are denoted by PLP, Pisciarelli small pool by PSP, Pisciarelli fumarole by PF, Solfatara mud pool by SMP, and Solfatara fumarole by SF. W represents water, M for mud, MO for mud outlet, E for green epilithic microbial layer from dry mud wall, and D for depo…
Supplementary Table 9 SIMPER analysis results showing top 5 genera that contributed to dissimiarity between Pisciarelli substrates.
Supplementary Table 10 Genome features of Solfatara-Pisciarelli MAGs. MAGs with the prefix "Solf" and "Pisc" are from Solfatara and Pisciarelli, respectively.
Supplementary Table 11 Metagenomic Reads per Kilobase per Gigabase (RPKGs).
Supplementary Table 12 Metabolic potential of MAGs in Solfatara-Pisciarelli hydrothermal systems. Y indicates the presence of genes in MAGs.

## Sheet: Suppl. Table 1
Supplementary Table 1 Bulk elemental composition of mud and fumarolic deposit samples from Solfatara and Pisciarelli. Samples collected from Pisciarelli large pool are denoted by PLP, Pisciarelli small pool by PSP, Pisciarelli fumarole by PF, Solfatara mud pool by SMP, and Solfatara fumarole by SF. M represents mud, MO for mud outlet, E for epilithic microbial layer from dry mud wall, and D for d…
	Sample	Sample description	Si (%)	S (%)	K (%)	Ti (%)	V (%)	Fe (%)	As (%)	Sr (%)	Zr (%)	Nb (%)	Ba (%)
Pisciarelli	PLP-MO_a	mud collected from the edge of Pisciarelli large mud pool outlet channel	54.06 ± 1.12	33.00 ± 1.29	4.98 ± 0.13	1.17 ± 0.07	0.05 ± 0.01	6.25 ± 0.24	BDL	0.17 ± 0.01	0.19 ± 0.02	0.02 ± 0.00	0.11 ± 0.02
	PLP-MO_b	mud collected from the edge of Pisciarelli large mud pool outlet channel	53.11 ± 2.22	35.07 ± 2.22	4.46 ± 0.08	1.10 ± 0.06	0.05 ± 0.01	5.81 ± 0.10	BDL	0.14 ± 0.01	0.17 ± 0.00	0.02 ± 0.00	0.08 ± 0.02
	PLP-E	green epilithic microbial layer collected from the dry mud wall about 1 m away from Pisciarelli large mud pool	46.63 ± 2.18	34.55 ± 1.26	13.94 ± 0.88	1.48 ± 0.12	0.15 ± 0.03	0.92 ± 0.02	BDL	0.91 ± 0.12	0.39 ± 0.05	0.05 ± 0.01	0.99 ± 0.23
	PSP-M	mud collected ~ 20 cm above water level from Pisciarelli small mud pool	75.97 ± 0.83	16.01 ± 0.76	4.14 ± 0.12	1.86 ± 0.15	0.09 ± 0.03	1.18 ± 0.13	BDL	0.15 ± 0.04	0.34 ± 0.05	0.04 ± 0.01	0.23 ± 0.04
	PF-D	fumarolic deposit collected from the hill about 10 m away from the boiling hot mud pools	32.89 ± 3.68	63.89 ± 4.05	BDL	1.98 ± 0.27	0.07 ± 0.05	0.53 ± 0.10	BDL	BDL	0.19 ± 0.02	0.04 ± 0.01	0.41 ± 0.10
Solfatara	SMP-M_a	mud collected ~ 50 cm above water level from Solfatara mud pool	52.81 ± 1.04	41.40 ± 0.99	2.35 ± 0.17	1.83 ± 0.19	0.06 ± 0.03	0.87 ± 0.04	0.07 ± 0.00	0.10 ± 0.02	0.29 ± 0.01	0.04 ± 0.00	0.18 ± 0.03
	SMP-M_b	mud collected ~ 50 cm above water level from Solfatara mud pool	43.15 ± 2.37	51.25 ± 2.57	2.39 ± 0.09	1.48 ± 0.10	0.08 ± 0.01	1.10 ± 0.06	0.06 ± 0.00	0.09 ± 0.01	0.23 ± 0.02	0.03 ± 0.00	0.13 ± 0.05
	SF-D_a	partially encrusted fumarolic deposit collected about 15 m away from the main fumarole, Bocca Grande	44.23 ± 4.85	45.75 ± 5.75	BDL	8.68 ± 1.10	0.18 ± 0.04	0.16 ± 0.05	BDL	BDL	0.25 ± 0.03	0.07 ± 0.01	0.74 ± 0.07
	SF-D_b	partially encrusted fumarolic deposit collected about 15 m away from the main fumarole, Bocca Grande	44.43 ± 1.4	43.66 ± 1.6	BDL	10.16 ± 0.28	0.24 ± 0.05	0.19 ± 0.02	BDL	BDL	0.29 ± 0.01	0.08 ± 0.00	0.95 ± 0.09

## Sheet: Suppl. Table 2
Supplementary Table 2 Anion and cation concentrations in Solfatara and Pisciarelli hydrothermal systems. Samples collected from Pisciarelli large pool are denoted by PLP, Pisciarelli small pool by PSP, Pisciarelli fumarole by PF, Solfatara mud pool by SMP, and Solfatara fumarole by SF. W represents water, M for mud, MO for mud outlet, E for epilithic microbial layer from dry mud wall, and D for d…
	Sample	Sample description	Cl- (ppm)	F- (ppm)	NH4+ (ppm)	NO3- (ppm)	PO43- (ppm)	SO42- (ppm)
Pisciarelli	PLP-W	water collected from Pisciarelli large mud pool	2.71 ± 0.05	0.56 ± 0.03	1130 ± 27	0.25 ± 0.01	0.48 ± 0.05	3326 ± 21.43
	PLP-M_a	mud collected at the edge of water level from Pisciarelli large mud pool	3.69 ± 0.02	1.46 ± 0.15	1998 ± 18.05	0.65 ± 0.04	BDL	6208 ± 24.73
	PLP-M_b	mud collected at the edge of water level from Pisciarelli large mud pool	2.47 ± 0.04	1.34 ± 0.03	1317 ± 24.63	0.28 ± 0.07	BDL	4014 ± 45.54
	PLP-MO_a	mud collected from the edge of Pisciarelli large mud pool outlet channel	BDL	0.21 ± 0.02	67.76 ± 2.22	0.29 ± 0.02	BDL	193.61 ± 8.48
	PLP-MO_b	mud collected from the edge of Pisciarelli large mud pool outlet channel	BDL	0.13 ± 0.01	46.51 ± 1.07	0.19 ± 0.02	BDL	134.40 ± 4.28
	PLP-E	green epilithic microbial layer collected from the dry mud wall about 1 m away from Pisciarelli large mud pool	0.14 ± 0.02	BDL	2.42 ± 0.11	0.25 ± 0.07	1.78 ± 0.28	318.84 ± 11.25
	PSP-W_a	water collected from Pisciarelli small mud pool	BDL	0.40 ± 0.01	1573 ± 20.60	0.24 ± 0.02	0.41 ± 0.07	4588.97 ± 55.46
	PSP-W_b	water collected from Pisciarelli small mud pool	BDL	0.26 ± 0.02	1420 ± 41.22	0.28 ± 0.03	BDL	4335.63 ± 55.11
	PSP-M	mud collected ~ 20 cm above water level from Pisciarelli small mud pool	BDL	BDL	37.79 ± 1.38	0.18 ± 0.02	BDL	117.76 ± 2.24
	PF-D	fumarolic deposit collected from the hill about 10 m away from the boiling hot mud pools	BDL	BDL	0.83 ± 0.25	0.19 ± 0.01	BDL	438.83 ± 10.59
Solfatara	SMP-W_a	water collected from the Solfatara mud pool	2.60 ± 0.06	0.50 ± 0.01	36.43 ± 1.9	0.22 ± 0.01	3.25 ± 0.4	2887.79 ± 39.63
	SMP-W_b	water collected from the Solfatara mud pool	2.57 ± 0.06	0.47 ± 0	31.26 ± 2.98	0.25 ± 0.02	2.76 ± 0.03	2875.05 ± 60.57
	SMP-M_a	mud collected ~ 50 cm above water level from Solfatara mud pool	BDL	0.04 ± 0.01	1.13 ± 0.28	0.28 ± 0.09	BDL	206.32 ± 12.49
	SMP-M_b	mud collected ~ 50 cm above water level from Solfatara mud pool	BDL	0.06 ± 0.01	1.79 ± 0.14	0.74 ± 0.77	BDL	335.15 ± 11.75
	SF-D_a	partially encrusted fumarolic deposit collected about 15 m away from the main fumarole, Bocca Grande	BDL	BDL	0.33 ± 0.03	1.35 ± 1.35	BDL	567.23 ± 22.07
	SF-D_b	partially encrusted fumarolic deposit collected about 15 m away from the main fumarole, Bocca Grande	BDL	BDL	0.31 ± 0.01	0.50 ± 0.24	BDL	610.24 ± 54.68

## Sheet: Suppl. Table 3
Supplementary Table 3 Total and organic δ13C, δ15N, and δ34S isotopic composition of water (W), mud (M), mud outlet (MO), epilithic microbial layer from dry mud wall (E), and fumarolic deposit (D) samples from Solfatara and Pisciarelli. PF-D2_1 (gray fumarolic deposit), PF-D2_1 (yellow fumarolic deposit), PLP-E_1 (green epilithic microbial layer), PLP-E_2 (green epilithic microbial layer), SMP-M_…
		Total								Organic
	Sample	δ13C (‰)	Wt.% C	δ15N (‰)	Wt.% N	C:N	δ34S (‰)	Wt.% S		δ13C (‰)	Wt.% C	Wt.% N	C:N
Pisciarelli	PLP-W	-24.32	1.31	0.41	4.33	0.3	-0.83	24.6		-24.06	1.06	3.43	0.309038
	PLP-M	-20.53	1.78	-2.13	0.48	3.71	0.41	10		-25.03	1.04	0.4	2.6
	PLP-MO	-22.35	1.57	-7.5	0.71	2.21	0.44	6.24		-22.38	1.36	0.62	2.19355
	PLP-E_1	-23.67	20.47	-32.32	3.18	6.44	0.08	7.89		-	-	-	-
	PLP-E_2	-25.32	5.63	-34.04	0.99	5.69	1.56	8.26		-	-	-	-
	PSP-W	-18.34	0.31	-14.93	1.73	0.18	2.62	0.22		-18.42	0.32	1.63	0.196319
	PSP-M	-19.84	0.19	-14.12	0.16	1.19	3.22	3.74		-19.42	0.17	0.13	1.30769
	PF-D_1	-9.52	1.1	-8.23	0.06	18.33	-6.54	16.61		-10.53	0.72	0.05	14.4
	PF-D_2	-5.48	0.14	-	-	-	-	-		-21.19	0.39	0.01	39
Solfatara	SMP-M_1	-22.24	1.04	-19.14	0.1	10.4	-0.48	34.45		-22.15	1.11	0.11	10.0909
	SMP-M_2	-22.9	0.75	-16.54	0.08	9.38	-0.75	26.34		-22.96	0.84	0.1	8.4
	SMP-M_3	-21.79	0.93	-17.8	0.17	5.47	-0.76	36.22		-21.93	0.87	0.15	5.8
	SF-D_1	0.61	1.06	-13.78	0.06	17.67	-4.65	9.57		-1.99	1.08	0.06	18
	SF-D_2	0.1	1.94	-10.13	0.13	14.92	-3.08	8.88		0.25	1.4	0.09	15.5556

## Sheet: Suppl. Table 4
Supplementary Table 4 List of contaminants removed from taxonomy table generated from metagenomic profiling owing to their identification as molecular biology kit and/or laboratory contaminants. Samples collected from Pisciarelli large pool are denoted by PLP, Pisciarelli small pool by PSP, Pisciarelli fumarole by PF, Solfatara mud pool by SMP, and Solfatara fumarole by SF. W represents water, M …
							Pisciarelli										Solfatara
Domain	Phylum	Class	Order	Family	Genus	Species	PLP-W (temp: 84.1 °C, pH: 2.5)	PLP-M_a (temp: 84.1 °C, pH: 2.5)	PLP-M_b (temp: 84.1 °C, pH: 2.5)	PLP-MO_a (temp: 78.9 °C, pH: 2.5)	PLP-MO_b (temp: 78.9 °C, pH: 2.5)	PLP-E (temp: 74 °C, pH: NA)	PSP-W_a (temp: 88.8 °C, pH: 1.5)	PSP-W_b (temp: 88.8 °C, pH: 1.5)	PSP-M (temp: 94.6 °C, pH: 2)	PF-D (temp: 93.3 °C, pH: 1.5)	SMP-W_a (temp: 42.5 °C, pH: 1)	SMP-W_b (temp: 42.5 °C, pH: 1)	SMP-M_a1 (temp: 68.8 °C, pH: 1)	SMP-M_a1.2 (temp: 68.8 °C, pH: 1)	SMP-M_b (temp: 68.8 °C, pH: 1)	SF-D_a (temp: 88.7 °C, pH: 1)	SF-D_b (temp: 88.7 °C, pH: 1)
Bacteria	Acidobacteria	Acidobacteriia	Bryobacterales	Bryobacteraceae	Bryobacter	Bryobacter aggregatus	98	326	58	194	319	1402	151	89	301	449	126	444	1326	1252	981	132	2799
Bacteria	Actinobacteria	Actinomycetia	Actinomycetales	Actinomycetaceae	Actinomyces	Actinomyces bouchesdurhonensis	94	221	0	137	33	99	118	20	83	272	55	20	264	159	211	127	267
Bacteria	Actinobacteria	Actinomycetia	Actinomycetales	Actinomycetaceae	Actinomyces	Actinomyces bowdenii	188	927	6	492	166	182	124	226	149	504	302	192	725	568	520	177	281
Bacteria	Actinobacteria	Actinomycetia	Actinomycetales	Actinomycetaceae	Actinomyces	Actinomyces culturomici	0	83	2	155	57	13	5	0	16	37	28	2	96	80	23	28	2
Bacteria	Actinobacteria	Actinomycetia	Actinomycetales	Actinomycetaceae	Actinomyces	Actinomyces dentalis	6371	20956	9	47649	4414	9011	2961	5764	7230	15951	6308	7856	26009	7663	15561	4296	12397
Bacteria	Actinobacteria	Actinomycetia	Actinomycetales	Actinomycetaceae	Actinomyces	Actinomyces denticolens	34	71	0	46	5	40	12	7	87	24	0	89	113	16	246	38	1
Bacteria	Actinobacteria	Actinomycetia	Actinomycetales	Actinomycetaceae	Actinomyces	Actinomyces gaoshouyii	241	1083	1	730	190	248	61	88	342	380	246	233	1245	498	333	154	368
Bacteria	Actinobacteria	Actinomycetia	Actinomycetales	Actinomycetaceae	Actinomyces	Actinomyces gerencseriae	2237	10869	4	3662	1873	3527	1007	1515	4105	4986	3871	3049	11891	3505	5602	1533	5302
Bacteria	Actinobacteria	Actinomycetia	Actinomycetales	Actinomycetaceae	Actinomyces	Actinomyces glycerinitolerans	7	133	2	44	7	83	15	64	12	129	27	2	87	85	95	14	52
Bacteria	Actinobacteria	Actinomycetia	Actinomycetales	Actinomycetaceae	Actinomyces	Actinomyces graevenitzii	81	473	2	250	106	190	51	105	286	723	79	284	496	303	269	252	307
Bacteria	Actinobacteria	Actinomycetia	Actinomycetales	Actinomycetaceae	Actinomyces	Actinomyces haliotis	25	167	0	93	1	65	18	9	35	70	87	6	242	193	46	33	7
Bacteria	Actinobacteria	Actinomycetia	Actinomycetales	Actinomycetaceae	Actinomyces	Actinomyces howellii	126	665	3	413	115	688	38	148	262	366	108	362	682	266	414	164	155
Bacteria	Actinobacteria	Actinomycetia	Actinomycetales	Actinomycetaceae	Actinomyces	Actinomyces israelii	2807	15139	7	5852	2596	4223	1521	2488	5383	5491	3216	4114	14398	4445	6227	2092	6413
Bacteria	Actinobacteria	Actinomycetia	Actinomycetales	Actinomycetaceae	Actinomyces	Actinomyces johnsonii	1433	5701	3	6781	1308	2771	764	1619	2164	7425	1949	2507	8716	3041	3702	1470	3250
Bacteria	Actinobacteria	Actinomycetia	Actinomycetales	Actinomycetaceae	Actinomyces	Actinomyces massiliensis	7542	23868	37	30903	7365	12731	4266	8064	10840	39511	8209	12147	34521	13643	17943	7377	18284
Bacteria	Actinobacteria	Actinomycetia	Actinomycetales	Actinomycetaceae	Actinomyces	Actinomyces mediterranea	3	69	2	23	0	48	33	16	0	79	3	27	152	278	87	46	101
Bacteria	Actinobacteria	Actinomycetia	Actinomycetales	Actinomycetaceae	Actinomyces	Actinomyces minihominis	16	44	0	61	2	48	0	0	0	106	21	71	63	64	42	47	73
Bacteria	Actinobacteria	Actinomycetia	Actinomycetales	Actinomycetaceae	Actinomyces	Actinomyces naeslundii	6422	23253	24	14598	5449	9849	3182	5891	8901	26474	6332	10138	31008	14748	14958	5268	12198
Bacteria	Actinobacteria	Actinomycetia	Actinomycetales	Actinomycetaceae	Actinomyces	Actinomyces oricola	99	467	0	236	91	206	22	22	132	233	62	147	857	202	146	71	206
Bacteria	Actinobacteria	Actinomycetia	Actinomycetales	Actinomycetaceae	Actinomyces	Actinomyces oris	15026	53574	268	31698	12387	21061	6354	12118	19949	62177	12923	19735	71790	25128	32309	12152	31254
Bacteria	Actinobacteria	Actinomycetia	Actinomycetales	Actinomycetaceae	Actinomyces	Actinomyces polynesiensis	14	56	0	24	6	84	16	17	3	41	34	26	145	197	28	24	87
Bacteria	Actinobacteria	Actinomycetia	Actinomycetales	Actinomycetaceae	Actinomyces	Actinomyces procaprae	61	107	0	19	11	2	20	51	87	119	5	98	198	21	103	32	133
Bacteria	Actinobacteria	Actinomycetia	Actinomycetales	Actinomycetaceae	Actinomyces	Actinomyces provencensis	0	51	1	118	21	0	1	16	0	42	0	0	70	255	65	62	78
Bacteria	Actinobacteria	Actinomycetia	Actinomycetales	Actinomycetaceae	Actinomyces	Actinomyces qiguomingii	57	221	1	118	129	126	35	47	115	176	69	104	105	90	77	94	84
Bacteria	Actinobacteria	Actinomycetia	Actinomycetales	Actinomycetaceae	Actinomyces	Actinomyces radicidentis	37	200	9	123	31	121	71	47	156	68	78	80	117	93	130	32	37
Bacteria	Actinobacteria	Actinomycetia	Actinomycetales	Actinomycetaceae	Actinomyces	Actinomyces ruminicola	137	315	2	250	119	130	31	107	76	200	61	134	325	630	142	89	257
Bacteria	Actinobacteria	Actinomycetia	Actinomycetales	Actinomycetaceae	Actinomyces	Actinomyces slackii	79	414	0	186	124	220	33	79	251	152	40	202	434	239	236	68	299
Bacteria	Actinobacteria	Actinomycetia	Actinomycetales	Actinomycetaceae	Actinomyces	Actinomyces sp. 2119	0	27	0	55	26	19	11	18	10	77	0	1	25	73	2	2	40
Bacteria	Actinobacteria	Actinomycetia	Actinomycetales	Actinomycetaceae	Actinomyces	Actinomyces sp. 2129	20	62	0	109	57	19	11	39	19	114	0	27	110	65	40	37	35
Bacteria	Actinobacteria	Actinomycetia	Actinomycetales	Actinomycetaceae	Actinomyces	Actinomyces sp. 299	21	17	0	21	1	0	6	8	21	2	5	0	17	0	0	4	1
Bacteria	Actinobacteria	Actinomycetia	Actinomycetales	Actinomycetaceae	Actinomyces	Actinomyces sp. 340	1	16	0	1	0	0	7	0	28	1	0	0	15	37	57	5	0
Bacteria	Actinobacteria	Actinomycetia	Actinomycetales	Actinomycetaceae	Actinomyces	Actinomyces sp. 432	0	79	0	34	0	13	9	35	0	107	22	19	70	3	25	14	92
Bacteria	Actinobacteria	Actinomycetia	Actinomycetales	Actinomycetaceae	Actinomyces	Actinomyces sp. 565	23	18	0	21	25	13	9	11	1	6	0	0	23	23	53	4	0
Bacteria	Actinobacteria	Actinomycetia	Actinomycetales	Actinomycetaceae	Actinomyces	Actinomyces sp. Chiba101	31	81	0	72	3	38	7	31	0	67	19	27	146	26	48	22	4
Bacteria	Actinobacteria	Actinomycetia	Actinomycetales	Actinomycetaceae	Actinomyces	Actinomyces sp. CtC 72	64	60	0	69	2	55	12	86	12	87	2	31	138	162	1	50	105
Bacteria	Actinobacteria	Actinomycetia	Actinomycetales	Actinomycetaceae	Actinomyces	Actinomyces sp. HMSC035G02	55	306	0	105	16	88	45	95	79	873	73	162	516	45	233	73	76
Bacteria	Actinobacteria	Actinomycetia	Actinomycetales	Actinomycetaceae	Actinomyces	Actinomyces sp. HMSC062G12	145	623	0	306	208	221	126	88	162	347	192	256	547	173	354	76	422
Bacteria	Actinobacteria	Actinomycetia	Actinomycetales	Actinomycetaceae	Actinomyces	Actinomyces sp. HMSC065F12	5	45	0	2	10	41	5	7	25	19	3	1	124	5	29	47	519
Bacteria	Actinobacteria	Actinomycetia	Actinomycetales	Actinomycetaceae	Actinomyces	Actinomyces sp. HMSC075B09	0	0	0	0	0	0	0	0	0	0	0	0	0	0	0	13	1
Bacteria	Actinobacteria	Actinomycetia	Actinomycetales	Actinomycetaceae	Actinomyces	Actinomyces sp. HMSC075C01	86	225	0	132	12	59	22	49	64	137	41	87	246	56	91	23	113
Bacteria	Actinobacteria	Actinomycetia	Actinomycetales	Actinomycetaceae	Actinomyces	Actinomyces sp. HMSC08A09	909	2611	0	1357	869	1292	311	475	926	2347	549	865	3668	1407	1465	471	1196
Bacteria	Actinobacteria	Actinomycetia	Actinomycetales	Actinomycetaceae	Actinomyces	Actinomyces sp. HMT 175	461	2078	1	1318	449	617	216	395	726	1721	461	870	2704	834	1186	426	1283
Bacteria	Actinobacteria	Actinomycetia	Actinomycetales	Actinomycetaceae	Actinomyces	Actinomyces sp. HMT 897	5711	40250	11	21968	5612	8294	2679	4834	9128	9998	6069	9187	41029	9361	14701	4224	12991
Bacteria	Actinobacteria	Actinomycetia	Actinomycetales	Actinomycetaceae	Actinomyces	Actinomyces sp. HPA0247	45	245	0	189	62	155	45	19	96	221	94	4	341	64	50	53	69
Bacteria	Actinobacteria	Actinomycetia	Actinomycetales	Actinomycetaceae	Actinomyces	Actinomyces sp. ICM39	120	307	0	168	80	164	43	84	76	634	42	116	429	88	190	102	185
Bacteria	Actinobacteria	Actinomycetia	Actinomycetales	Actinomycetaceae	Actinomyces	Actinomyces sp. ICM47	243	816	3	544	418	374	170	210	243	1557	304	191	1163	355	390	329	358
Bacteria	Actinobacteria	Actinomycetia	Actinomycetales	Actinomycetaceae	Actinomyces	Actinomyces sp. ICM54	112	189	0	55	0	43	19	25	78	412	18	55	379	39	208	17	169
Bacteria	Actinobacteria	Actinomycetia	Actinomycetales	Actinomycetaceae	Actinomyces	Actinomyces sp. ICM58	2	160	0	93	38	29	16	73	94	172	76	24	308	99	161	48	106
Bacteria	Actinobacteria	Actinomycetia	Actinomycetales	Actinomycetaceae	Actinomyces	Actinomyces sp. K20	0	10	0	16	0	0	0	0	0	0	0	0	3	0	0	8	0
Bacteria	Actinobacteria	Actinomycetia	Actinomycetales	Actinomycetaceae	Actinomyces	Actinomyces sp. Marseille-P3109	459	1298	3	667	444	496	255	478	554	2131	606	541	1403	958	818	526	950
Bacteria	Actinobacteria	Actinomycetia	Actinomycetales	Actinomycetaceae	Actinomyces	Actinomyces sp. oral taxon 169	281	615	0	385	170	226	72	161	288	621	183	207	945	284	304	154	419
Bacteria	Actinobacteria	Actinomycetia	Actinomycetales	Actinomycetaceae	Actinomyces	Actinomyces sp. oral taxon 170	569	1422	2	821	342	441	176	411	587	1358	286	601	1761	1085	1105	385	709
Bacteria	Actinobacteria	Actinomycetia	Actinomycetales	Actinomycetaceae	Actinomyces	Actinomyces sp. oral taxon 171	483	2301	2	1547	553	1240	304	624	842	2632	500	1044	2780	1190	1550	636	966
Bacteria	Actinobacteria	Actinomycetia	Actinomycetales	Actinomycetaceae	Actinomyces	Actinomyces sp. oral taxon 172	125	422	0	245	80	127	32	73	146	365	122	185	369	110	81	42	250
Bacteria	Actinobacteria	Actinomycetia	Actinomycetales	Actinomycetaceae	Actinomyces	Actinomyces sp. oral taxon 175	1591	5719	10	3350	1518	2171	597	1188	2024	5441	1399	2154	7686	2864	3404	1031	2889
Bacteria	Actinobacteria	Actinomycetia	Actinomycetales	Actinomycetaceae	Actinomyces	Actinomyces sp. oral taxon 178	22	148	2	104	1	38	18	43	23	129	68	17	179	77	149	47	111
Bacteria	Actinobacteria	Actinomycetia	Actinomycetales	Actinomycetaceae	Actinomyces	Actinomyces sp. oral taxon 180	2946	12169	8	4751	2099	3458	1392	2257	3816	7086	2584	3715	13730	3510	6388	1910	5598
Bacteria	Actinobacteria	Actinomycetia	Actinomycetales	Actinomycetaceae	Actinomyces	Actinomyces sp. oral taxon 181	0	33	0	11	17	2	6	1	0	107	14	0	86	6	86	4	0
Bacteria	Actinobacteria	Actinomycetia	Actinomycetales	Actinomycetaceae	Actinomyces	Actinomyces sp. oral taxon 414	1491	6856	6	10640	1911	2872	1160	2189	2340	6225	2059	2974	8150	2556	4856	1583	2973
Bacteria	Actinobacteria	Actinomycetia	Actinomycetales	Actinomycetaceae	Actinomyces	Actinomyces sp. oral taxon 448	208	1262	4	907	296	675	173	218	315	667	238	358	1441	745	760	220	486
Bacteria	Actinobacteria	Actinomycetia	Actinomycetales	Actinomycetaceae	Actinomyces	Actinomyces sp. oral taxon 848	28	419	0	426	58	258	36	184	160	2884	238	171	565	166	108	125	215
Bacteria	Actinobacteria	Actinomycetia	Actinomycetales	Actinomycetaceae	Actinomyces	Actinomyces sp. oral taxon 849	169	818	2	961	159	376	87	252	294	959	402	364	1032	577	885	237	837
Bacteria	Actinobacteria	Actinomycetia	Actinomycetales	Actinomycetaceae	Actinomyces	Actinomyces sp. oral taxon 877	133	127	4	119	50	138	30	84	202	278	107	143	162	215	269	77	216
Bacteria	Actinobacteria	Actinomycetia	Actinomycetales	Actinomycetaceae	Actinomyces	Actinomyces sp. oral taxon 897	7204	47358	20	25625	5958	10052	2747	5575	9645	12528	6782	10540	43514	9655	16999	5047	15188
Bacteria	Actinobacteria	Actinomycetia	Actinomycetales	Actinomycetaceae	Actinomyces	Actinomyces sp. ph3	0	6	0	39	0	18	7	4	16	92	0	64	19	1	0	1	34
Bacteria	Actinobacteria	Actinomycetia	Actinomycetales	Actinomycetaceae	Actinomyces	Actinomyces sp. S4-C9	0	4	0	0	2	3	0	26	6	28	1	0	10	0	0	12	0
Bacteria	Actinobacteria	Actinomycetia	Actinomycetales	Actinomycetaceae	Actinomyces	Actinomyces sp. S6-Spd3	28	73	0	37	8	34	27	71	0	174	34	76	144	13	98	19	2
Bacteria	Actinobacteria	Actinomycetia	Actinomycetales	Actinomycetaceae	Actinomyces	Actinomyces sp. UMB0138	5	16	0	4	0	9	0	0	24	5	0	0	180	1	0	5	0
Bacteria	Actinobacteria	Actinomycetia	Actinomycetales	Actinomycetaceae	Actinomyces	Actinomyces sp. Z5	0	2	0	13	0	1	14	0	0	0	0	0	28	2	31	7	0
Bacteria	Actinobacteria	Actinomycetia	Actinomycetales	Actinomycetaceae	Actinomyces	Actinomyces sp. zg-987	1	29	0	2	1	12	6	8	37	44	2	42	21	26	2	1	57
Bacteria	Actinobacteria	Actinomycetia	Actinomycetales	Actinomycetaceae	Actinomyces	Actinomyces sp. zg-993	0	18	0	0	0	15	0	0	2	19	0	0	1	4	2	8	0
Bacteria	Actinobacteria	Actinomycetia	Actinomycetales	Actinomycetaceae	Actinomyces	Actinomyces sp. ZJ293	37	56	0	1	0	15	1	16	0	36	28	0	12	14	0	4	0
Bacteria	Actinobacteria	Actinomycetia	Actinomycetales	Actinomycetaceae	Actinomyces	Actinomyces sp. ZJ308	114	482	0	469	85	293	48	60	148	538	134	109	599	230	269	129	129
Bacteria	Actinobacteria	Actinomycetia	Actinomycetales	Actinomycetaceae	Actinomyces	Actinomyces sp. ZJ561	1	33	0	68	12	21	0	28	0	0	0	94	70	134	1	10	50
Bacteria	Actinobacteria	Actinomycetia	Actinomycetales	Actinomycetaceae	Actinomyces	Actinomyces sp.	13222	66475	122	24352	13152	19480	5994	9576	18360	23792	12182	19728	65637	22498	32485	9739	30338
Bacteria	Actinobacteria	Actinomycetia	Actinomycetales	Actinomycetaceae	Actinomyces	Actinomyces succiniciruminis	118	256	0	225	49	146	9	28	32	138	80	62	320	116	227	27	99
Bacteria	Actinobacteria	Actinomycetia	Actinomycetales	Actinomycetaceae	Actinomyces	Actinomyces timonensis	95	354	0	270	214	137	37	129	170	246	111	87	596	177	176	34	191
Bacteria	Actinobacteria	Actinomycetia	Actinomycetales	Actinomycetaceae	Actinomyces	Actinomyces urinae	0	9	0	14	0	0	0	0	37	0	0	0	9	2	0	4	78
Bacteria	Actinobacteria	Actinomycetia	Actinomycetales	Actinomycetaceae	Actinomyces	Actinomyces urogenitalis	229	1056	2	675	299	474	82	126	244	736	138	333	1113	570	639	154	719
Bacteria	Actinobacteria	Actinomycetia	Actinomycetales	Actinomycetaceae	Actinomyces	Actinomyces viscosus	1339	6478	9	3492	1511	2706	712	1355	2488	5926	1581	2768	8269	2658	3970	1305	3721
Bacteria	Actinobacteria	Actinomycetia	Actinomycetales	Actinomycetaceae	Actinomyces	Actinomyces vulturis	22	133	0	105	1	106	10	14	16	45	11	33	161	89	34	27	172
Bacteria	Actinobacteria	Actinomycetia	Actinomycetales	Actinomycetaceae	Actinomyces	Actinomyces weissii	73	246	0	68	3	57	31	71	0	142	42	146	132	25	140	48	170
Bacteria	Actinobacteria	Actinomycetia	Actinomycetales	Actinomycetaceae	Actinomyces	uncultured Actinomyces sp.	149	643	1	374	142	269	80	165	320	898	309	369	1196	513	497	223	559
Bacteria	Actinobacteria	Actinomycetia	Actinomycetales	Actinomycetaceae	Arcanobacterium	Arcanobacterium haemolyticum	19	129	0	4	19	103	13	43	31	224	26	14	285	142	141	56	259
Bacteria	Actinobacteria	Actinomycetia	Actinomycetales	Actinomycetaceae	Arcanobacterium	Arcanobacterium ihumii	0	19	0	0	0	0	5	11	0	2	28	24	25	115	3	8	0
Bacteria	Actinobacteria	Actinomycetia	Actinomycetales	Actinomycetaceae	Arcanobacterium	Arcanobacterium phocae	16	69	0	60	78	31	1	0	0	50	4	62	25	45	86	25	30
Bacteria	Actinobacteria	Actinomycetia	Actinomycetales	Actinomycetaceae	Arcanobacterium	Arcanobacterium sp. 2701	0	20	0	21	0	36	10	0	0	15	0	0	28	9	15	8	114
Bacteria	Actinobacteria	Actinomycetia	Actinomycetales	Actinomycetaceae	Arcanobacterium	Arcanobacterium sp. JY-X040	49	1	0	22	0	1	7	9	13	17	0	2	53	95	0	15	93
Bacteria	Actinobacteria	Actinomycetia	Actinomycetales	Actinomycetaceae	Arcanobacterium	Arcanobacterium sp. JY-X174	0	13	0	3	25	3	0	13	0	37	0	0	8	0	0	2	1
Bacteria	Actinobacteria	Actinomycetia	Actinomycetales	Actinomycetaceae	Arcanobacterium	Arcanobacterium sp. S3PF19	2	2	0	18	0	36	13	11	1	16	1	17	67	97	42	9	153
Bacteria	Actinobacteria	Actinomycetia	Actinomycetales	Actinomycetaceae	Arcanobacterium	Arcanobacterium urinimassiliense	43	58	6	2	1	14	11	41	0	86	11	0	112	65	1	62	74
Bacteria	Actinobacteria	Actinomycetia	Bifidobacteriales	Bifidobacteriaceae	Bifidobacterium	Bifidobacterium adolescentis	226	689	9	536	180	725	175	187	372	660	209	313	996	444	436	265	828
Bacteria	Actinobacteria	Actinomycetia	Bifidobacteriales	Bifidobacteriaceae	Bifidobacterium	Bifidobacterium aemilianum	0	0	1	6	0	23	5	13	2	15	0	0	19	15	0	17	6
Bacteria	Actinobacteria	Actinomycetia	Bifidobacteriales	Bifidobacteriaceae	Bifidobacterium	Bifidobacterium aerophilum	0	28	0	6	0	297	0	37	0	38	0	53	182	163	1	22	20
Bacteria	Actinobacteria	Actinomycetia	Bifidobacteriales	Bifidobacteriaceae	Bifidobacterium	Bifidobacterium angulatum	0	0	0	1	0	1	0	0	0	0	0	0	98	172	1	1	3
Bacteria	Actinobacteria	Actinomycetia	Bifidobacteriales	Bifidobacteriaceae	Bifidobacterium	Bifidobacterium animalis	21	55	4	26	2	35	20	4	9	60	28	3	111	185	62	59	70
Bacteria	Actinobacteria	Actinomycetia	Bifidobacteriales	Bifidobacteriaceae	Bifidobacterium	Bifidobacterium apri	0	2	0	0	0	2	3	0	1	0	0	0	16	26	21	29	97
Bacteria	Actinobacteria	Actinomycetia	Bifidobacteriales	Bifidobacteriaceae	Bifidobacterium	Bifidobacterium aquikefiri	1	19	0	28	0	24	10	9	21	13	0	3	91	116	1	2	9
Bacteria	Actinobacteria	Actinomycetia	Bifidobacteriales	Bifidobacteriaceae	Bifidobacterium	Bifidobacterium avesanii	0	6	0	0	42	345	0	5	0	21	2	1	84	70	0	2	15
Bacteria	Actinobacteria	Actinomycetia	Bifidobacteriales	Bifidobacteriaceae	Bifidobacterium	Bifidobacterium biavatii	1	8	1	0	9	48	0	1	1	14	4	2	68	13	0	29	44
Bacteria	Actinobacteria	Actinomycetia	Bifidobacteriales	Bifidobacteriaceae	Bifidobacterium	Bifidobacterium bifidum	27	57	13	65	78	64	22	47	68	47	51	31	134	158	106	26	3
Bacteria	Actinobacteria	Actinomycetia	Bifidobacteriales	Bifidobacteriaceae	Bifidobacterium	Bifidobacterium bohemicum	10	14	0	37	93	42	1	1	8	12	2	53	98	59	12	24	18
Bacteria	Actinobacteria	Actinomycetia	Bifidobacteriales	Bifidobacteriaceae	Bifidobacterium	Bifidobacterium bombi	0	14	1	0	1	17	2	0	46	4	0	0	42	2	0	10	22
Bacteria	Actinobacteria	Actinomycetia	Bifidobacteriales	Bifidobacteriaceae	Bifidobacterium	Bifidobacterium boum	0	0	0	0	0	0	0	1	0	0	1	0	2	1	1	2	0
Bacteria	Actinobacteria	Actinomycetia	Bifidobacteriales	Bifidobacteriaceae	Bifidobacterium	Bifidobacterium breve	64	269	0	130	108	300	42	69	132	124	35	81	431	475	298	108	423
Bacteria	Actinobacteria	Actinomycetia	Bifidobacteriales	Bifidobacteriaceae	Bifidobacterium	Bifidobacterium callimiconis	0	12	0	0	11	80	5	0	0	5	2	16	15	12	12	31	0
Bacteria	Actinobacteria	Actinomycetia	Bifidobacteriales	Bifidobacteriaceae	Bifidobacterium	Bifidobacterium callitrichos	8	17	1	1	19	0	0	0	0	12	1	0	66	117	0	7	33
Bacteria	Actinobacteria	Actinomycetia	Bifidobacteriales	Bifidobacteriaceae	Bifidobacterium	Bifidobacterium castoris	0	8	0	12	0	0	8	17	1	51	20	28	1	12	48	21	18
Bacteria	Actinobacteria	Actinomycetia	Bifidobacteriales	Bifidobacteriaceae	Bifidobacterium	Bifidobacterium catenulatum	3	23	22	17	9	175	10	53	99	163	0	275	128	43	46	16	119
Bacteria	Actinobacteria	Actinomycetia	Bifidobacteriales	Bifidobacteriaceae	Bifidobacterium	Bifidobacterium catulorum	8	5	0	0	0	4	15	0	1	25	1	0	17	1	6	18	41
Bacteria	Actinobacteria	Actinomycetia	Bifidobacteriales	Bifidobacteriaceae	Bifidobacterium	Bifidobacterium choerinum	0	18	0	23	26	9	8	0	0	115	0	0	28	300	26	2	73
Bacteria	Actinobacteria	Actinomycetia	Bifidobacteriales	Bifidobacteriaceae	Bifidobacterium	Bifidobacterium choloepi	21	2	0	21	0	1	6	0	0	34	9	0	182	613	8	16	27
Bacteria	Actinobacteria	Actinomycetia	Bifidobacteriales	Bifidobacteriaceae	Bifidobacterium	Bifidobacterium criceti	0	19	0	28	5	1	0	0	0	1	0	0	0	1	2	1	0
Bacteria	Actinobacteria	Actinomycetia	Bifidobacteriales	Bifidobacteriaceae	Bifidobacterium	Bifidobacterium crudilactis	0	16	0	0	0	42	0	2	0	51	0	26	56	71	0	6	5
Bacteria	Actinobacteria	Actinomycetia	Bifidobacteriales	Bifidobacteriaceae	Bifidobacterium	Bifidobacterium dentium	0	39	0	55	0	54	24	1	19	95	13	26	16	24	21	13	69
Bacteria	Actinobacteria	Actinomycetia	Bifidobacteriales	Bifidobacteriaceae	Bifidobacterium	Bifidobacterium eulemuris	0	5	0	1	0	5	1	26	0	3	0	0	34	2	0	13	74
Bacteria	Actinobacteria	Actinomycetia	Bifidobacteriales	Bifidobacteriaceae	Bifidobacterium	Bifidobacterium felsineum	0	0	0	0	0	34	0	1	26	0	0	0	32	0	0	12	0
Bacteria	Actinobacteria	Actinomycetia	Bifidobacteriales	Bifidobacteriaceae	Bifidobacterium	Bifidobacterium gallicum	7	13	0	0	0	0	1	1	17	4	1	0	45	238	1	23	1
Bacteria	Actinobacteria	Actinomycetia	Bifidobacteriales	Bifidobacteriaceae	Bifidobacterium	Bifidobacterium goeldii	15	4	0	0	0	99	0	0	14	0	0	0	38	18	2	11	0
Bacteria	Actinobacteria	Actinomycetia	Bifidobacteriales	Bifidobacteriaceae	Bifidobacterium	Bifidobacterium hapali	14	36	4	102	0	67	0	40	0	68	41	1	56	34	45	22	22
Bacteria	Actinobacteria	Actinomycetia	Bifidobacteriales	Bifidobacteriaceae	Bifidobacterium	Bifidobacterium imperatoris	0	8	0	0	0	0	4	0	0	9	0	0	30	21	0	3	0
Bacteria	Actinobacteria	Actinomycetia	Bifidobacteriales	Bifidobacteriaceae	Bifidobacterium	Bifidobacterium indicum	1	0	0	0	0	0	0	0	0	0	0	22	30	0	0	13	0
Bacteria	Actinobacteria	Actinomycetia	Bifidobacteriales	Bifidobacteriaceae	Bifidobacterium	Bifidobacterium italicum	0	38	0	0	0	1	0	7	0	23	0	0	1	1	1	5	11
Bacteria	Actinobacteria	Actinomycetia	Bifidobacteriales	Bifidobacteriaceae	Bifidobacterium	Bifidobacterium jacchi	12	35	0	0	21	1	2	12	34	14	0	15	21	44	1	3	1
Bacteria	Actinobacteria	Actinomycetia	Bifidobacteriales	Bifidobacteriaceae	Bifidobacterium	Bifidobacterium lemurum	29	41	0	0	0	4	0	9	0	48	0	100	36	28	20	38	1
Bacteria	Actinobacteria	Actinomycetia	Bifidobacteriales	Bifidobacteriaceae	Bifidobacterium	Bifidobacterium longum CAG:69	7	8	0	8	9	0	0	0	0	29	0	0	0	0	0	1	0
Bacteria	Actinobacteria	Actinomycetia	Bifidobacteriales	Bifidobacteriaceae	Bifidobacterium	Bifidobacterium longum	89	692	14	181	217	391	75	80	208	771	166	222	840	948	370	183	509
Bacteria	Actinobacteria	Actinomycetia	Bifidobacteriales	Bifidobacteriaceae	Bifidobacterium	Bifidobacterium magnum	0	13	0	11	0	34	16	15	0	55	18	14	78	117	26	7	79
Bacteria	Actinobacteria	Actinomycetia	Bifidobacteriales	Bifidobacteriaceae	Bifidobacterium	Bifidobacterium merycicum	0	8	0	0	18	20	1	0	12	0	0	0	58	32	0	3	25
Bacteria	Actinobacteria	Actinomycetia	Bifidobacteriales	Bifidobacteriaceae	Bifidobacterium	Bifidobacterium minimum	0	17	0	10	0	68	0	25	14	12	9	72	43	54	22	38	22
Bacteria	Actinobacteria	Actinomycetia	Bifidobacteriales	Bifidobacteriaceae	Bifidobacterium	Bifidobacterium moukalabense	23	16	0	0	26	21	7	8	1	35	12	0	32	63	0	20	18
Bacteria	Actinobacteria	Actinomycetia	Bifidobacteriales	Bifidobacteriaceae	Bifidobacterium	Bifidobacterium myosotis	0	12	0	4	0	47	3	17	1	23	0	0	37	2	1	2	26
Bacteria	Actinobacteria	Actinomycetia	Bifidobacteriales	Bifidobacteriaceae	Bifidobacterium	Bifidobacterium parmae	0	3	0	1	1	9	0	14	1	5	0	0	3	4	31	9	23
Bacteria	Actinobacteria	Actinomycetia	Bifidobacteriales	Bifidobacteriaceae	Bifidobacterium	Bifidobacterium porcinum	0	23	0	0	0	15	0	0	0	2	9	0	14	0	0	4	1
Bacteria	Actinobacteria	Actinomycetia	Bifidobacteriales	Bifidobacteriaceae	Bifidobacterium	Bifidobacterium pseudocatenulatum	58	122	2	91	30	50	14	1	1	169	10	44	108	147	84	27	87
Bacteria	Actinobacteria	Actinomycetia	Bifidobacteriales	Bifidobacteriaceae	Bifidobacterium	Bifidobacterium pseudolongum	124	106	9	75	80	118	22	21	106	243	43	107	234	12	77	83	100
Bacteria	Actinobacteria	Actinomycetia	Bifidobacteriales	Bifidobacteriaceae	Bifidobacterium	Bifidobacterium psychraerophilum	19	21	0	73	0	91	3	0	4	20	24	0	32	153	43	2	43
Bacteria	Actinobacteria	Actinomycetia	Bifidobacteriales	Bifidobacteriaceae	Bifidobacterium	Bifidobacterium pullorum	60	94	1	1	0	101	25	16	18	172	63	39	184	199	121	68	121
Bacteria	Actinobacteria	Actinomycetia	Bifidobacteriales	Bifidobacteriaceae	Bifidobacterium	Bifidobacterium ramosum	23	6	0	0	0	67	0	0	37	36	24	12	3	3	2	2	0
Bacteria	Actinobacteria	Actinomycetia	Bifidobacteriales	Bifidobacteriaceae	Bifidobacterium	Bifidobacterium reuteri	0	2	0	0	0	1	0	0	0	0	1	0	14	1	0	1	0
Bacteria	Actinobacteria	Actinomycetia	Bifidobacteriales	Bifidobacteriaceae	Bifidobacterium	Bifidobacterium rousetti	0	0	0	103	0	3	0	0	0	20	0	0	46	199	0	10	45
Bacteria	Actinobacteria	Actinomycetia	Bifidobacteriales	Bifidobacteriaceae	Bifidobacterium	Bifidobacterium saguini	0	14	0	0	0	0	7	16	3	43	0	34	0	0	0	7	22
Bacteria	Actinobacteria	Actinomycetia	Bifidobacteriales	Bifidobacteriaceae	Bifidobacterium	Bifidobacterium samirii	0	23	0	0	8	37	1	0	1	0	0	0	32	51	3	10	2
Bacteria	Actinobacteria	Actinomycetia	Bifidobacteriales	Bifidobacteriaceae	Bifidobacterium	Bifidobacterium scaligerum	0	9	0	0	0	13	0	0	0	22	19	0	30	31	0	17	0
Bacteria	Actinobacteria	Actinomycetia	Bifidobacteriales	Bifidobacteriaceae	Bifidobacterium	Bifidobacterium scardovii	0	42	0	17	30	86	8	5	22	34	3	26	55	235	10	24	42
Bacteria	Actinobacteria	Actinomycetia	Bifidobacteriales	Bifidobacteriaceae	Bifidobacterium	Bifidobacterium simiarum	0	21	0	0	0	0	0	14	0	3	0	0	25	22	28	3	1
Bacteria	Actinobacteria	Actinomycetia	Bifidobacteriales	Bifidobacteriaceae	Bifidobacterium	Bifidobacterium sp. 7101	0	14	0	0	0	4	10	0	9	0	4	0	13	34	0	4	0
Bacteria	Actinobacteria	Actinomycetia	Bifidobacteriales	Bifidobacteriaceae	Bifidobacterium	Bifidobacterium sp. A11	0	10	0	0	0	0	0	11	12	35	0	0	3	3	0	12	33
Bacteria	Actinobacteria	Actinomycetia	Bifidobacteriales	Bifidobacteriaceae	Bifidobacterium	Bifidobacterium sp. DSM 109957	0	0	0	0	0	0	17	0	0	0	8	0	42	50	6	1	0
Bacteria	Actinobacteria	Actinomycetia	Bifidobacteriales	Bifidobacteriaceae	Bifidobacterium	Bifidobacterium sp. DSM 109958	0	7	10	15	10	64	38	15	39	9	1	0	17	74	48	14	1
Bacteria	Actinobacteria	Actinomycetia	Bifidobacteriales	Bifidobacteriaceae	Bifidobacterium	Bifidobacterium sp. DSM 109959	0	10	0	4	0	17	0	0	2	0	0	0	1	4	0	29	0
Bacteria	Actinobacteria	Actinomycetia	Bifidobacteriales	Bifidobacteriaceae	Bifidobacterium	Bifidobacterium sp. DSM 109960	11	7	0	0	0	1	0	0	0	9	0	1	13	68	45	1	1
Bacteria	Actinobacteria	Actinomycetia	Bifidobacteriales	Bifidobacteriaceae	Bifidobacterium	Bifidobacterium sp. DSM 109963	11	0	0	0	0	27	0	2	0	39	0	1	0	0	29	2	0
Bacteria	Actinobacteria	Actinomycetia	Bifidobacteriales	Bifidobacteriaceae	Bifidobacterium	Bifidobacterium sp. LMG 31469	0	1	0	0	0	0	8	0	1	5	4	3	54	29	0	6	21
Bacteria	Actinobacteria	Actinomycetia	Bifidobacteriales	Bifidobacteriaceae	Bifidobacterium	Bifidobacterium sp. LMG 31471	0	46	0	0	0	1	1	7	14	19	5	0	55	295	86	13	20
Bacteria	Actinobacteria	Actinomycetia	Bifidobacteriales	Bifidobacteriaceae	Bifidobacterium	Bifidobacterium sp. UTBIF-68	0	13	0	16	0	36	4	0	0	21	0	20	3	1	0	13	0
Bacteria	Actinobacteria	Actinomycetia	Bifidobacteriales	Bifidobacteriaceae	Bifidobacterium	Bifidobacterium stellenboschense	0	3	0	1	0	1	0	39	0	0	0	0	52	8	67	17	16
Bacteria	Actinobacteria	Actinomycetia	Bifidobacteriales	Bifidobacteriaceae	Bifidobacterium	Bifidobacterium subtile	0	6	0	12	0	53	0	0	18	3	14	0	10	1	4	22	109
Bacteria	Actinobacteria	Actinomycetia	Bifidobacteriales	Bifidobacteriaceae	Bifidobacterium	Bifidobacterium thermophilum	51	45	0	67	66	64	11	33	47	24	13	32	133	108	25	18	120
Bacteria	Actinobacteria	Actinomycetia	Bifidobacteriales	Bifidobacteriaceae	Bifidobacterium	Bifidobacterium tibiigranuli	4394	9306	33	6631	3249	7409	2982	3297	5123	15465	3815	5568	13290	5838	9026	9896	10102
Bacteria	Actinobacteria	Actinomycetia	Bifidobacteriales	Bifidobacteriaceae	Bifidobacterium	Bifidobacterium tissieri	1	9	0	18	0	1	3	0	0	36	0	1	21	1	9	4	39
Bacteria	Actinobacteria	Actinomycetia	Bifidobacteriales	Bifidobacteriaceae	Bifidobacterium	Bifidobacterium tsurumiense	2	13	0	15	1	26	0	18	15	0	0	1	30	113	5	8	0
Bacteria	Actinobacteria	Actinomycetia	Bifidobacteriales	Bifidobacteriaceae	Bifidobacterium	Bifidobacterium vansinderenii	9	27	0	25	1	7	0	0	43	1	0	2	23	51	1	53	57
Bacteria	Actinobacteria	Actinomycetia	Bifidobacteriales	Bifidobacteriaceae	Bifidobacterium	Bifidobacterium vespertilionis	0	0	0	3	0	20	1	10	0	2	0	0	0	49	1	4	1
Bacteria	Actinobacteria	Actinomycetia	Bifidobacteriales	Bifidobacteriaceae	Bifidobacterium	Bifidobacterium xylocopae	11	20	0	17	11	2	8	0	22	35	11	20	60	37	3	19	46
Bacteria	Actinobacteria	Actinomycetia	Bifidobacteriales	Bifidobacteriaceae	Gardnerella	Gardnerella sp. KA00735	0	3	0	0	0	10	1	0	2	6	1	0	4	0	1	5	63
Bacteria	Actinobacteria	Actinomycetia	Bifidobacteriales	Bifidobacteriaceae	Gardnerella	Gardnerella vaginalis	61	257	5	288	74	279	54	90	211	526	119	276	634	270	384	186	734
Bacteria	Actinobacteria	Actinomycetia	Corynebacteriales	Corynebacteriaceae	Corynebacterium	Corynebacterium accolens	109	648	0	96	158	270	160	201	333	1120	61	261	882	322	241	333	1245
Bacteria	Actinobacteria	Actinomycetia	Corynebacteriales	Corynebacteriaceae	Corynebacterium	Corynebacterium afermentans	1176	6985	9	2667	1448	2720	854	870	1607	21035	1568	2180	8831	2146	2446	2136	4665
Bacteria	Actinobacteria	Actinomycetia	Corynebacteriales	Corynebacteriaceae	Corynebacterium	Corynebacterium alimapuense	43	77	0	36	0	65	13	45	54	106	18	71	111	94	63	44	234
Bacteria	Actinobacteria	Actinomycetia	Corynebacteriales	Corynebacteriaceae	Corynebacterium	Corynebacterium ammoniagenes	68	93	5	48	49	129	8	18	20	135	26	66	47	38	83	51	202
Bacteria	Actinobacteria	Actinomycetia	Corynebacteriales	Corynebacteriaceae	Corynebacterium	Corynebacterium amycolatum	32	376	0	104	113	83	22	86	98	506	91	997	401	40	66	119	1976
Bacteria	Actinobacteria	Actinomycetia	Corynebacteriales	Corynebacteriaceae	Corynebacterium	Corynebacterium anserum	1	42	0	0	1	10	16	5	14	33	5	1	104	50	37	9	61
Bacteria	Actinobacteria	Actinomycetia	Corynebacteriales	Corynebacteriaceae	Corynebacterium	Corynebacterium appendicis	8873	55215	39	19752	13037	18387	6036	7927	11392	120342	12084	11395	67071	14659	20325	14942	24744
Bacteria	Actinobacteria	Actinomycetia	Corynebacteriales	Corynebacteriaceae	Corynebacterium	Corynebacterium aquatimens	75	632	1	136	30	143	46	38	128	901	80	124	708	175	142	84	384
Bacteria	Actinobacteria	Actinomycetia	Corynebacteriales	Corynebacteriaceae	Corynebacterium	Corynebacterium aquilae	26	11	0	34	45	2	3	2	3	13	0	0	30	60	23	42	37
Bacteria	Actinobacteria	Actinomycetia	Corynebacteriales	Corynebacteriaceae	Corynebacterium	Corynebacterium argentoratense	0	8	0	31	5	45	0	0	6	32	22	70	21	124	73	16	46
Bacteria	Actinobacteria	Actinomycetia	Corynebacteriales	Corynebacteriaceae	Corynebacterium	Corynebacterium atypicum	50	72	0	5	16	156	3	28	465	37	7	100	106	126	55	36	616
Bacteria	Actinobacteria	Actinomycetia	Corynebacteriales	Corynebacteriaceae	Corynebacterium	Corynebacterium aurimucosum	2438	10858	16	5265	2419	4980	1814	2239	5089	23078	2875	4253	15700	4630	8033	4529	56077
Bacteria	Actinobacteria	Actinomycetia	Corynebacteriales	Corynebacteriaceae	Corynebacterium	Corynebacterium auriscanis	0	41	0	0	8	10	0	0	0	28	0	0	44	18	0	8	1
Bacteria	Actinobacteria	Actinomycetia	Corynebacteriales	Corynebacteriaceae	Corynebacterium	Corynebacterium belfantii	12	30	0	67	9	52	6	0	16	44	17	21	149	198	26	22	130
Bacteria	Actinobacteria	Actinomycetia	Corynebacteriales	Corynebacteriaceae	Corynebacterium	Corynebacterium bouchesdurhonense	285	1228	1	409	218	713	169	208	476	1844	315	461	1557	392	442	384	2490
Bacteria	Actinobacteria	Actinomycetia	Corynebacteriales	Corynebacteriaceae	Corynebacterium	Corynebacterium bovis	57	94	3	9	124	14258	38	95	105	228	35	122	287	917	201	149	297
Bacteria	Actinobacteria	Actinomycetia	Corynebacteriales	Corynebacteriaceae	Corynebacterium	Corynebacterium callunae	1	48	0	91	13	35	3	14	14	37	27	69	59	42	1	19	44
Bacteria	Actinobacteria	Actinomycetia	Corynebacteriales	Corynebacteriaceae	Corynebacterium	Corynebacterium camporealensis	3	139	1	29	23	65	20	21	108	364	73	44	295	21	241	61	458
Bacteria	Actinobacteria	Actinomycetia	Corynebacteriales	Corynebacteriaceae	Corynebacterium	Corynebacterium canis	30	44	0	34	42	6	4	0	51	31	25	65	30	138	1	7	3
Bacteria	Actinobacteria	Actinomycetia	Corynebacteriales	Corynebacteriaceae	Corynebacterium	Corynebacterium capitovis	20	220	2	41	15	10	1	30	103	336	16	23	151	31	160	16	403
Bacteria	Actinobacteria	Actinomycetia	Corynebacteriales	Corynebacteriaceae	Corynebacterium	Corynebacterium casei	25	89	0	65	62	48	19	20	83	150	62	82	128	48	96	9	272
Bacteria	Actinobacteria	Actinomycetia	Corynebacteriales	Corynebacteriaceae	Corynebacterium	Corynebacterium caspium	9	30	0	21	8	69	5	0	35	50	1	7	39	51	79	14	83
Bacteria	Actinobacteria	Actinomycetia	Corynebacteriales	Corynebacteriaceae	Corynebacterium	Corynebacterium choanis	16	39	3	1	52	29	11	21	13	125	0	66	69	71	63	38	201
Bacteria	Actinobacteria	Actinomycetia	Corynebacteriales	Corynebacteriaceae	Corynebacterium	Corynebacterium ciconiae	72	52	45	34	79	30	101	95	3	49	1	42	56	189	81	38	26
Bacteria	Actinobacteria	Actinomycetia	Corynebacteriales	Corynebacteriaceae	Corynebacterium	Corynebacterium coyleae	52	314	0	188	2	135	40	18	91	670	84	74	302	92	255	85	278
Bacteria	Actinobacteria	Actinomycetia	Corynebacteriales	Corynebacteriaceae	Corynebacterium	Corynebacterium crenatum	0	0	0	0	0	0	0	0	0	0	0	0	0	0	0	1	0
Bacteria	Actinobacteria	Actinomycetia	Corynebacteriales	Corynebacteriaceae	Corynebacterium	Corynebacterium crudilactis	3	15	0	2	0	13	5	16	0	34	0	0	29	125	25	16	2
Bacteria	Actinobacteria	Actinomycetia	Corynebacteriales	Corynebacteriaceae	Corynebacterium	Corynebacterium cystitidis	18	140	0	1	12	52	15	4	87	240	64	44	230	100	76	60	286
Bacteria	Actinobacteria	Actinomycetia	Corynebacteriales	Corynebacteriaceae	Corynebacterium	Corynebacterium dentalis	0	10	0	0	0	246	4	0	0	9	0	0	20	0	1	7	75
Bacteria	Actinobacteria	Actinomycetia	Corynebacteriales	Corynebacteriaceae	Corynebacterium	Corynebacterium deserti	21	66	0	62	23	69	15	17	0	92	8	18	126	46	28	12	72
Bacteria	Actinobacteria	Actinomycetia	Corynebacteriales	Corynebacteriaceae	Corynebacterium	Corynebacterium diphtheriae	24630	52712	172	33982	17877	37390	16282	19310	29598	86175	18894	30891	70439	33429	50088	52984	58593
Bacteria	Actinobacteria	Actinomycetia	Corynebacteriales	Corynebacteriaceae	Corynebacterium	Corynebacterium doosanense	18	96	1	19	44	61	37	25	35	191	36	97	191	140	44	104	231
Bacteria	Actinobacteria	Actinomycetia	Corynebacteriales	Corynebacteriaceae	Corynebacterium	Corynebacterium durum	985	2102	226	1803	884	1443	810	1038	1361	6966	878	1172	5351	2324	1547	1087	1895
Bacteria	Actinobacteria	Actinomycetia	Corynebacteriales	Corynebacteriaceae	Corynebacterium	Corynebacterium efficiens	396	907	4	713	404	571	214	286	381	1193	465	377	1572	708	848	622	1319
Bacteria	Actinobacteria	Actinomycetia	Corynebacteriales	Corynebacteriaceae	Corynebacterium	Corynebacterium endometrii	69	186	0	41	47	121	55	59	74	291	47	100	237	128	149	130	449
Bacteria	Actinobacteria	Actinomycetia	Corynebacteriales	Corynebacteriaceae	Corynebacterium	Corynebacterium epidermidicanis	1	48	0	28	2	22	1	4	60	131	11	0	81	78	179	32	102
Bacteria	Actinobacteria	Actinomycetia	Corynebacteriales	Corynebacteriaceae	Corynebacterium	Corynebacterium falsenii	217	373	0	139	66	212	50	111	208	313	68	275	576	175	327	175	359
Bacteria	Actinobacteria	Actinomycetia	Corynebacteriales	Corynebacteriaceae	Corynebacterium	Corynebacterium flavescens	19	233	1	96	9	102	33	15	31	197	45	128	305	162	109	56	431
Bacteria	Actinobacteria	Actinomycetia	Corynebacteriales	Corynebacteriaceae	Corynebacterium	Corynebacterium fournieri	342	1713	0	829	406	1000	290	231	513	5788	412	532	2563	731	458	766	1411
Bacteria	Actinobacteria	Actinomycetia	Corynebacteriales	Corynebacteriaceae	Corynebacterium	Corynebacterium frankenforstense	82	272	1	328	193	722	115	78	24989	1317	371	1020	1095	2270	3992	238	54874
Bacteria	Actinobacteria	Actinomycetia	Corynebacteriales	Corynebacteriaceae	Corynebacterium	Corynebacterium freiburgense	13	6	0	1	37	25	6	28	1	70	1	2	57	3	6	7	90
Bacteria	Actinobacteria	Actinomycetia	Corynebacteriales	Corynebacteriaceae	Corynebacterium	Corynebacterium freneyi	3	37	1	18	0	81	0	0	0	46	57	22	62	80	65	34	10
Bacteria	Actinobacteria	Actinomycetia	Corynebacteriales	Corynebacteriaceae	Corynebacterium	Corynebacterium genitalium	1057	6715	2	2687	1136	2350	462	858	2590	20264	1337	2359	8515	2703	10822	1882	33135
Bacteria	Actinobacteria	Actinomycetia	Corynebacteriales	Corynebacteriaceae	Corynebacterium	Corynebacterium geronticis	1	19	0	55	3	0	2	0	1	54	0	14	30	64	1	11	4
Bacteria	Actinobacteria	Actinomycetia	Corynebacteriales	Corynebacteriaceae	Corynebacterium	Corynebacterium glaucum	214	1495	1	331	542	402	92	206	306	1981	330	331	2396	559	544	299	3685
Bacteria	Actinobacteria	Actinomycetia	Corynebacteriales	Corynebacteriaceae	Corynebacterium	Corynebacterium glucuronolyticum	218	1007	2	513	162	360	76	176	301	2434	218	381	844	348	292	322	1285
Bacteria	Actinobacteria	Actinomycetia	Corynebacteriales	Corynebacteriaceae	Corynebacterium	Corynebacterium glutamicum	77	356	1	85	31	219	59	51	62	471	113	54	463	125	190	121	298
Bacteria	Actinobacteria	Actinomycetia	Corynebacteriales	Corynebacteriaceae	Corynebacterium	Corynebacterium glyciniphilum	6	67	0	106	19	75	40	9	17	147	8	81	74	96	68	1	160
Bacteria	Actinobacteria	Actinomycetia	Corynebacteriales	Corynebacteriaceae	Corynebacterium	Corynebacterium godavarianum	0	161	0	107	24	76	7	1	42	332	44	87	218	49	76	140	142
Bacteria	Actinobacteria	Actinomycetia	Corynebacteriales	Corynebacteriaceae	Corynebacterium	Corynebacterium gottingense	11	109	0	27	0	7	7	1	1	47	25	91	264	17	132	229	60
Bacteria	Actinobacteria	Actinomycetia	Corynebacteriales	Corynebacteriaceae	Corynebacterium	Corynebacterium hadale	231	1135	2	525	192	394	149	125	292	1307	92	318	1510	470	622	1886	2991
Bacteria	Actinobacteria	Actinomycetia	Corynebacteriales	Corynebacteriaceae	Corynebacterium	Corynebacterium haemomassiliense	4750	23550	21	8429	4693	9515	2571	3903	4854	103043	5200	6277	33074	5894	9443	7236	13134
Bacteria	Actinobacteria	Actinomycetia	Corynebacteriales	Corynebacteriaceae	Corynebacterium	Corynebacterium halotolerans	28	69	3	62	57	67	23	34	149	263	102	46	109	105	59	90	479
Bacteria	Actinobacteria	Actinomycetia	Corynebacteriales	Corynebacteriaceae	Corynebacterium	Corynebacterium heidelbergense	43	79	0	2	2	105	5	24	156	294	24	60	131	16	87	35	22
Bacteria	Actinobacteria	Actinomycetia	Corynebacteriales	Corynebacteriaceae	Corynebacterium	Corynebacterium humireducens	30	35	0	39	22	2	1	9	65	82	16	38	83	100	22	24	178
Bacteria	Actinobacteria	Actinomycetia	Corynebacteriales	Corynebacteriaceae	Corynebacterium	Corynebacterium imitans	326	1359	2	849	319	668	284	349	493	2437	407	432	1673	802	780	843	1274
Bacteria	Actinobacteria	Actinomycetia	Corynebacteriales	Corynebacteriaceae	Corynebacterium	Corynebacterium jeddahense	328	910	0	454	136	439	143	239	183	3018	242	212	1281	396	360	285	1173
Bacteria	Actinobacteria	Actinomycetia	Corynebacteriales	Corynebacteriaceae	Corynebacterium	Corynebacterium jeikeium	204	1534	4	495	357	637	177	295	347	2059	339	326	2256	579	688	435	1772
Bacteria	Actinobacteria	Actinomycetia	Corynebacteriales	Corynebacteriaceae	Corynebacterium	Corynebacterium kefirresidentii	6114	18002	24	10721	5649	10116	3873	4739	7585	25956	5931	8111	32338	11147	15628	8032	19109
Bacteria	Actinobacteria	Actinomycetia	Corynebacteriales	Corynebacteriaceae	Corynebacterium	Corynebacterium kroppenstedtii	945	1449	12	1702	796	1747	355	803	2137	3143	1299	20021	1551	1920	1527	616	1990
Bacteria	Actinobacteria	Actinomycetia	Corynebacteriales	Corynebacteriaceae	Corynebacterium	Corynebacterium kutscheri	102	267	0	179	63	93	40	29	129	376	113	91	445	223	219	96	145
Bacteria	Actinobacteria	Actinomycetia	Corynebacteriales	Corynebacteriaceae	Corynebacterium	Corynebacterium lactis	4	53	2	74	64	18	8	23	16	131	0	57	190	318	83	45	71
Bacteria	Actinobacteria	Actinomycetia	Corynebacteriales	Corynebacteriaceae	Corynebacterium	Corynebacterium lipophiloflavum	0	144	0	52	57	96	13	21	44	237	90	113	120	178	94	56	174
Bacteria	Actinobacteria	Actinomycetia	Corynebacteriales	Corynebacteriaceae	Corynebacterium	Corynebacterium lowii	1	60	1	30	42	71	8	20	57	67	25	2	64	97	14	30	119
Bacteria	Actinobacteria	Actinomycetia	Corynebacteriales	Corynebacteriaceae	Corynebacterium	Corynebacterium lubricantis	16	89	3	117	61	16	29	3	37	184	83	109	370	411	51	50	267
Bacteria	Actinobacteria	Actinomycetia	Corynebacteriales	Corynebacteriaceae	Corynebacterium	Corynebacterium macginleyi	237	900	2	473	132	601	178	248	343	1357	223	395	1409	384	773	434	1466
Bacteria	Actinobacteria	Actinomycetia	Corynebacteriales	Corynebacteriaceae	Corynebacterium	Corynebacterium marinum	41	151	0	1	0	16	14	23	45	102	43	69	170	168	101	54	42
Bacteria	Actinobacteria	Actinomycetia	Corynebacteriales	Corynebacteriaceae	Corynebacterium	Corynebacterium maris	64	115	0	124	54	21	46	14	3	128	0	37	128	66	183	17	161
Bacteria	Actinobacteria	Actinomycetia	Corynebacteriales	Corynebacteriaceae	Corynebacterium	Corynebacterium massiliense	736	1128	0	652	421	794	115	325	420	1659	495	596	1563	858	813	302	664
Bacteria	Actinobacteria	Actinomycetia	Corynebacteriales	Corynebacteriaceae	Corynebacterium	Corynebacterium mastitidis	8	87	1	8	52	70	14	14	47	124	18	69	254	325	133	51	205
Bacteria	Actinobacteria	Actinomycetia	Corynebacteriales	Corynebacteriaceae	Corynebacterium	Corynebacterium matruchotii	2158	6431	15	4753	2027	3674	1020	2250	2735	9833	3704	3323	10116	6215	4752	2497	4899
Bacteria	Actinobacteria	Actinomycetia	Corynebacteriales	Corynebacteriaceae	Corynebacterium	Corynebacterium minutissimum	806	5488	7	1562	999	1663	602	498	994	5111	954	1780	6816	1211	1578	1652	2886
Bacteria	Actinobacteria	Actinomycetia	Corynebacteriales	Corynebacteriaceae	Corynebacterium	Corynebacterium mucifaciens	539	2796	6	1524	721	1660	556	660	1111	6785	806	1032	4881	1159	1751	901	2036
Bacteria	Actinobacteria	Actinomycetia	Corynebacteriales	Corynebacteriaceae	Corynebacterium	Corynebacterium mustelae	25	53	0	87	62	82	7	0	98	95	44	44	119	38	6	20	203
Bacteria	Actinobacteria	Actinomycetia	Corynebacteriales	Corynebacteriaceae	Corynebacterium	Corynebacterium mycetoides	88	246	0	227	137	76	66	64	78	637	45	27	429	187	55	73	396
Bacteria	Actinobacteria	Actinomycetia	Corynebacteriales	Corynebacteriaceae	Corynebacterium	Corynebacterium neomassiliense	0	1	0	0	0	1	7	13	28	44	0	15	28	38	0	23	21
Bacteria	Actinobacteria	Actinomycetia	Corynebacteriales	Corynebacteriaceae	Corynebacterium	Corynebacterium nuruki	101	38	1	0	46	32	6	0	52	90	1	37	138	79	40	31	132
Bacteria	Actinobacteria	Actinomycetia	Corynebacteriales	Corynebacteriaceae	Corynebacterium	Corynebacterium oculi	5	93	2	1	36	25	30	42	30	257	26	31	265	309	29	49	96
Bacteria	Actinobacteria	Actinomycetia	Corynebacteriales	Corynebacteriaceae	Corynebacterium	Corynebacterium otitidis	250	278	4	277	191	1023	242	250	134	389	172	367	2863	395	586	131	703
Bacteria	Actinobacteria	Actinomycetia	Corynebacteriales	Corynebacteriaceae	Corynebacterium	Corynebacterium pacaense	0	15	0	0	0	135	9	14	24	101	0	1	49	202	46	72	143
Bacteria	Actinobacteria	Actinomycetia	Corynebacteriales	Corynebacteriaceae	Corynebacterium	Corynebacterium pelargi	2	18	1	25	0	13	1	6	2	16	18	0	124	1	16	20	0
Bacteria	Actinobacteria	Actinomycetia	Corynebacteriales	Corynebacteriaceae	Corynebacterium	Corynebacterium phocae	10	34	0	73	15	23	20	31	19	125	11	26	188	17	72	36	455
Bacteria	Actinobacteria	Actinomycetia	Corynebacteriales	Corynebacteriaceae	Corynebacterium	Corynebacterium phoceense	12	76	0	57	59	53	6	18	59	431	33	109	172	32	67	54	117
Bacteria	Actinobacteria	Actinomycetia	Corynebacteriales	Corynebacteriaceae	Corynebacterium	Corynebacterium pilosum	18	78	1	30	0	51	0	0	68	143	9	34	135	18	20	15	156
Bacteria	Actinobacteria	Actinomycetia	Corynebacteriales	Corynebacteriaceae	Corynebacterium	Corynebacterium pollutisoli	0	40	0	36	10	47	7	6	25	42	10	19	115	17	99	42	114
Bacteria	Actinobacteria	Actinomycetia	Corynebacteriales	Corynebacteriaceae	Corynebacterium	Corynebacterium propinquum	10439	22220	67	14987	5274	20066	12326	9831	9499	75758	9200	8899	25925	10202	15501	35505	31732
Bacteria	Actinobacteria	Actinomycetia	Corynebacteriales	Corynebacteriaceae	Corynebacterium	Corynebacterium provencense	24	27	13	225	48	465	19	90	30	309	1	1041	260	245	40	11	144
Bacteria	Actinobacteria	Actinomycetia	Corynebacteriales	Corynebacteriaceae	Corynebacterium	Corynebacterium pseudodiphtheriticum	177	419	0	189	201	345	123	114	167	1033	110	181	544	254	187	477	373
Bacteria	Actinobacteria	Actinomycetia	Corynebacteriales	Corynebacteriaceae	Corynebacterium	Corynebacterium pseudogenitalium	1871	7311	369	2673	3728	2412	755	1072	1582	8714	1209	1785	7860	2214	3665	2546	13566
Bacteria	Actinobacteria	Actinomycetia	Corynebacteriales	Corynebacteriaceae	Corynebacterium	Corynebacterium pseudopelargi	0	10	0	1	0	20	0	0	1	11	0	0	36	2	0	11	4
Bacteria	Actinobacteria	Actinomycetia	Corynebacteriales	Corynebacteriaceae	Corynebacterium	Corynebacterium pseudotuberculosis	2	83	2	146	3	44	3	18	47	104	66	54	112	94	59	40	110
Bacteria	Actinobacteria	Actinomycetia	Corynebacteriales	Corynebacteriaceae	Corynebacterium	Corynebacterium pyruviciproducens	489	2598	6	1207	407	1096	217	553	731	3780	649	813	3531	1001	932	1457	30528
Bacteria	Actinobacteria	Actinomycetia	Corynebacteriales	Corynebacteriaceae	Corynebacterium	Corynebacterium renale	9	119	4	18	18	42	9	33	8	176	48	76	104	190	104	82	272
Bacteria	Actinobacteria	Actinomycetia	Corynebacteriales	Corynebacteriaceae	Corynebacterium	Corynebacterium resistens	78	138	0	155	33	40	17	21	19	397	100	83	314	46	115	42	161
Bacteria	Actinobacteria	Actinomycetia	Corynebacteriales	Corynebacteriaceae	Corynebacterium	Corynebacterium riegelii	35	234	2	167	5	31	26	34	116	466	83	41	290	52	69	48	269
Bacteria	Actinobacteria	Actinomycetia	Corynebacteriales	Corynebacteriaceae	Corynebacterium	Corynebacterium rouxii	349	1530	1	1427	443	2177	285	277	552	2039	543	666	1965	791	1281	859	2326
Bacteria	Actinobacteria	Actinomycetia	Corynebacteriales	Corynebacteriaceae	Corynebacterium	Corynebacterium sanguinis	1	217	0	107	61	52	56	11	6	445	52	27	335	64	38	36	337
Bacteria	Actinobacteria	Actinomycetia	Corynebacteriales	Corynebacteriaceae	Corynebacterium	Corynebacterium segmentosum	20	96	0	101	33	80	6	8	2	260	11	44	152	48	36	4	132
Bacteria	Actinobacteria	Actinomycetia	Corynebacteriales	Corynebacteriaceae	Corynebacterium	Corynebacterium senegalense	21	259	0	157	57	223	29	3	70	506	64	33	367	80	78	60	436
Bacteria	Actinobacteria	Actinomycetia	Corynebacteriales	Corynebacteriaceae	Corynebacterium	Corynebacterium simulans	86	319	0	154	210	211	30	47	83	435	51	239	497	147	243	121	780
Bacteria	Actinobacteria	Actinomycetia	Corynebacteriales	Corynebacteriaceae	Corynebacterium	Corynebacterium singulare	548	3464	4	1108	496	780	222	393	388	3244	606	841	4071	769	752	898	1663
Bacteria	Actinobacteria	Actinomycetia	Corynebacteriales	Corynebacteriaceae	Corynebacterium	Corynebacterium sp. 13CS0277	31	60	0	1	2	37	2	42	1	52	3	0	101	63	35	40	111
Bacteria	Actinobacteria	Actinomycetia	Corynebacteriales	Corynebacteriaceae	Corynebacterium	Corynebacterium sp. 1959	42	49	0	38	42	276	41	19	40	123	80	31	206	201	7	22	58
Bacteria	Actinobacteria	Actinomycetia	Corynebacteriales	Corynebacteriaceae	Corynebacterium	Corynebacterium sp. 2019	11	60	1	23	3	95	4	15	10	56	2	3	94	91	52	27	107
Bacteria	Actinobacteria	Actinomycetia	Corynebacteriales	Corynebacteriaceae	Corynebacterium	Corynebacterium sp. 2039	64	55	0	2	13	9	23	0	47	49	0	2	158	122	76	39	88
Bacteria	Actinobacteria	Actinomycetia	Corynebacteriales	Corynebacteriaceae	Corynebacterium	Corynebacterium sp. 2184	0	25	0	0	0	2	0	0	0	9	0	0	0	0	0	5	40
Bacteria	Actinobacteria	Actinomycetia	Corynebacteriales	Corynebacteriaceae	Corynebacterium	Corynebacterium sp. 239_CJEI	0	0	0	0	0	0	0	0	0	0	0	21	4	0	0	5	0
Bacteria	Actinobacteria	Actinomycetia	Corynebacteriales	Corynebacteriaceae	Corynebacterium	Corynebacterium sp. 4H37-19	92	37	53	92	37	6	255	205	3	130	35	14	59	85	84	89	120
Bacteria	Actinobacteria	Actinomycetia	Corynebacteriales	Corynebacteriaceae	Corynebacterium	Corynebacterium sp. BCW_4722	29	113	1	95	63	48	21	0	23	258	8	18	246	31	75	76	273
Bacteria	Actinobacteria	Actinomycetia	Corynebacteriales	Corynebacteriaceae	Corynebacterium	Corynebacterium sp. CCM 8835	0	24	0	0	0	47	0	0	0	0	1	0	13	6	10	15	0
Bacteria	Actinobacteria	Actinomycetia	Corynebacteriales	Corynebacteriaceae	Corynebacterium	Corynebacterium sp. CCM 8836	23	56	0	28	1	26	1	23	27	46	4	8	22	4	4	24	35
Bacteria	Actinobacteria	Actinomycetia	Corynebacteriales	Corynebacteriaceae	Corynebacterium	Corynebacterium sp. CCM 8863	21	7	0	0	2	1	6	8	78	22	20	2	77	64	0	16	1
Bacteria	Actinobacteria	Actinomycetia	Corynebacteriales	Corynebacteriaceae	Corynebacterium	Corynebacterium sp. CCM 8864	0	37	0	9	0	75	12	6	3	10	6	0	15	123	4	30	80
Bacteria	Actinobacteria	Actinomycetia	Corynebacteriales	Corynebacteriaceae	Corynebacterium	Corynebacterium sp. CMW7794	57	76	0	91	1	137	22	41	145	156	50	30	138	61	3	13	220
Bacteria	Actinobacteria	Actinomycetia	Corynebacteriales	Corynebacteriaceae	Corynebacterium	Corynebacterium sp. CNJ-954	0	20	0	34	6	73	3	2	6	99	21	0	154	8	2	14	44
Bacteria	Actinobacteria	Actinomycetia	Corynebacteriales	Corynebacteriaceae	Corynebacterium	Corynebacterium sp. DNF00584	26	47	0	15	78	1	18	1	23	69	0	1	61	0	0	4	99
Bacteria	Actinobacteria	Actinomycetia	Corynebacteriales	Corynebacteriaceae	Corynebacterium	Corynebacterium sp. DSM 45110	70	59	2	69	28	808	11	0	29	60	9	4	109	70	58	53	92
Bacteria	Actinobacteria	Actinomycetia	Corynebacteriales	Corynebacteriaceae	Corynebacterium	Corynebacterium sp. ED61	0	26	0	50	25	262	2	0	1	46	14	0	10	12	35	17	171
Bacteria	Actinobacteria	Actinomycetia	Corynebacteriales	Corynebacteriaceae	Corynebacterium	Corynebacterium sp. EPI-003-04-2554_SCH2473622	0	50	0	37	17	37	32	50	24	163	2	0	81	0	0	59	21
Bacteria	Actinobacteria	Actinomycetia	Corynebacteriales	Corynebacteriaceae	Corynebacterium	Corynebacterium sp. FDAARGOS 1242	376	2225	4	495	375	625	245	222	518	1915	390	391	2885	469	535	835	864
Bacteria	Actinobacteria	Actinomycetia	Corynebacteriales	Corynebacteriaceae	Corynebacterium	Corynebacterium sp. HFH0082	0	36	0	17	19	12	0	5	0	55	57	230	36	0	0	1	86
Bacteria	Actinobacteria	Actinomycetia	Corynebacteriales	Corynebacteriaceae	Corynebacterium	Corynebacterium sp. HMSC034A01	340	2010	1	684	291	1069	283	344	636	7489	325	472	2754	627	560	666	1505
Bacteria	Actinobacteria	Actinomycetia	Corynebacteriales	Corynebacteriaceae	Corynebacterium	Corynebacterium sp. HMSC034B08	6	79	0	23	0	0	14	25	0	222	39	84	46	17	22	22	19
Bacteria	Actinobacteria	Actinomycetia	Corynebacteriales	Corynebacteriaceae	Corynebacterium	Corynebacterium sp. HMSC034E11	22	37	0	1	0	0	0	23	0	43	0	0	62	17	0	32	34
Bacteria	Actinobacteria	Actinomycetia	Corynebacteriales	Corynebacteriaceae	Corynebacterium	Corynebacterium sp. HMSC034H07	2	28	0	21	0	0	7	1	0	70	0	26	104	38	2	1	36
Bacteria	Actinobacteria	Actinomycetia	Corynebacteriales	Corynebacteriaceae	Corynebacterium	Corynebacterium sp. HMSC035E02	35	56	0	29	0	53	19	0	0	75	9	0	108	39	5	7	95
Bacteria	Actinobacteria	Actinomycetia	Corynebacteriales	Corynebacteriaceae	Corynebacterium	Corynebacterium sp. HMSC036D02	30	50	1	5	34	41	17	32	30	98	11	44	127	65	21	15	385
Bacteria	Actinobacteria	Actinomycetia	Corynebacteriales	Corynebacteriaceae	Corynebacterium	Corynebacterium sp. HMSC036D03	4	59	0	58	10	2	3	0	55	102	25	75	102	47	26	48	124
Bacteria	Actinobacteria	Actinomycetia	Corynebacteriales	Corynebacteriaceae	Corynebacterium	Corynebacterium sp. HMSC036E10	0	7	0	0	0	0	0	0	1	4	3	0	6	28	53	1	24
Bacteria	Actinobacteria	Actinomycetia	Corynebacteriales	Corynebacteriaceae	Corynebacterium	Corynebacterium sp. HMSC04H06	127	203	3	116	136	109	77	12	143	339	201	107	334	94	260	58	113
Bacteria	Actinobacteria	Actinomycetia	Corynebacteriales	Corynebacteriaceae	Corynebacterium	Corynebacterium sp. HMSC055A01	1	68	0	4	0	11	3	0	0	173	20	1	102	2	104	36	437
Bacteria	Actinobacteria	Actinomycetia	Corynebacteriales	Corynebacteriaceae	Corynebacterium	Corynebacterium sp. HMSC056E09	1	75	0	33	0	1	0	10	0	86	0	1	106	14	60	40	388
Bacteria	Actinobacteria	Actinomycetia	Corynebacteriales	Corynebacteriaceae	Corynebacterium	Corynebacterium sp. HMSC059E07	15	100	0	22	16	0	2	0	1	118	3	106	150	149	46	17	523
Bacteria	Actinobacteria	Actinomycetia	Corynebacteriales	Corynebacteriaceae	Corynebacterium	Corynebacterium sp. HMSC05C01	0	19	0	33	0	40	6	12	1	184	37	1	116	9	0	25	24
Bacteria	Actinobacteria	Actinomycetia	Corynebacteriales	Corynebacteriaceae	Corynebacterium	Corynebacterium sp. HMSC05D03	30	50	0	9	24	53	1	0	33	123	22	69	96	74	128	35	123
Bacteria	Actinobacteria	Actinomycetia	Corynebacteriales	Corynebacteriaceae	Corynebacterium	Corynebacterium sp. HMSC05E07	220	782	1	246	77	204	71	123	122	906	239	528	1238	193	249	245	251
Bacteria	Actinobacteria	Actinomycetia	Corynebacteriales	Corynebacteriaceae	Corynebacterium	Corynebacterium sp. HMSC05H05	519	2268	1	632	446	899	269	329	609	8335	622	759	3009	677	806	706	1675
Bacteria	Actinobacteria	Actinomycetia	Corynebacteriales	Corynebacteriaceae	Corynebacterium	Corynebacterium sp. HMSC061H03	10	22	0	11	0	0	0	0	0	18	0	59	24	48	8	5	29
Bacteria	Actinobacteria	Actinomycetia	Corynebacteriales	Corynebacteriaceae	Corynebacterium	Corynebacterium sp. HMSC062E11	0	64	0	48	23	2	1	15	18	187	1	46	49	0	64	6	174
Bacteria	Actinobacteria	Actinomycetia	Corynebacteriales	Corynebacteriaceae	Corynebacterium	Corynebacterium sp. HMSC065D07	0	36	2	22	0	28	4	0	1	37	0	82	24	10	1	8	507
Bacteria	Actinobacteria	Actinomycetia	Corynebacteriales	Corynebacteriaceae	Corynebacterium	Corynebacterium sp. HMSC066C02	7	99	3	37	30	47	0	15	0	120	10	55	108	71	61	23	92
Bacteria	Actinobacteria	Actinomycetia	Corynebacteriales	Corynebacteriaceae	Corynebacterium	Corynebacterium sp. HMSC068G04	2	25	0	1	0	0	0	0	19	7	0	1	44	18	0	31	105
Bacteria	Actinobacteria	Actinomycetia	Corynebacteriales	Corynebacteriaceae	Corynebacterium	Corynebacterium sp. HMSC068H04	16	119	0	53	0	15	0	0	51	59	1	2	36	27	11	2	1273
Bacteria	Actinobacteria	Actinomycetia	Corynebacteriales	Corynebacteriaceae	Corynebacterium	Corynebacterium sp. HMSC069E04	256	840	2	482	144	529	211	194	424	1093	350	358	805	671	457	640	955
Bacteria	Actinobacteria	Actinomycetia	Corynebacteriales	Corynebacteriaceae	Corynebacterium	Corynebacterium sp. HMSC06C06	0	8	0	0	0	0	10	0	22	18	12	22	22	1	15	7	1
Bacteria	Actinobacteria	Actinomycetia	Corynebacteriales	Corynebacteriaceae	Corynebacterium	Corynebacterium sp. HMSC06D04	3	75	0	19	28	15	3	0	0	162	1	0	30	29	53	28	280
Bacteria	Actinobacteria	Actinomycetia	Corynebacteriales	Corynebacteriaceae	Corynebacterium	Corynebacterium sp. HMSC06G04	22	93	0	33	1	26	16	6	0	109	21	13	76	0	23	15	29
Bacteria	Actinobacteria	Actinomycetia	Corynebacteriales	Corynebacteriaceae	Corynebacterium	Corynebacterium sp. HMSC070E08	128	171	0	105	35	74	25	65	47	296	28	83	352	147	244	54	209
Bacteria	Actinobacteria	Actinomycetia	Corynebacteriales	Corynebacteriaceae	Corynebacterium	Corynebacterium sp. HMSC070H05	0	22	0	0	0	0	9	1	6	2	0	0	36	0	19	22	1
Bacteria	Actinobacteria	Actinomycetia	Corynebacteriales	Corynebacteriaceae	Corynebacterium	Corynebacterium sp. HMSC071B10	88	224	0	98	73	169	26	0	0	275	68	0	347	33	96	51	322
Bacteria	Actinobacteria	Actinomycetia	Corynebacteriales	Corynebacteriaceae	Corynebacterium	Corynebacterium sp. HMSC071F07	0	5	0	0	0	1	0	0	0	6	0	0	34	0	1	3	44
Bacteria	Actinobacteria	Actinomycetia	Corynebacteriales	Corynebacteriaceae	Corynebacterium	Corynebacterium sp. HMSC072A02	0	59	0	9	0	12	9	4	38	52	1	0	95	44	12	2	626
Bacteria	Actinobacteria	Actinomycetia	Corynebacteriales	Corynebacteriaceae	Corynebacterium	Corynebacterium sp. HMSC072A04	12	59	0	0	0	1	3	5	0	77	0	28	45	80	4	35	64
Bacteria	Actinobacteria	Actinomycetia	Corynebacteriales	Corynebacteriaceae	Corynebacterium	Corynebacterium sp. HMSC072B08	0	0	0	0	0	0	0	0	0	0	0	0	0	0	0	5	0
Bacteria	Actinobacteria	Actinomycetia	Corynebacteriales	Corynebacteriaceae	Corynebacterium	Corynebacterium sp. HMSC072D01	0	7	0	55	26	0	2	0	0	34	9	61	14	1	0	1	0
Bacteria	Actinobacteria	Actinomycetia	Corynebacteriales	Corynebacteriaceae	Corynebacterium	Corynebacterium sp. HMSC072D12	60	79	0	19	64	10	4	11	0	57	47	38	155	22	1	23	70
Bacteria	Actinobacteria	Actinomycetia	Corynebacteriales	Corynebacteriaceae	Corynebacterium	Corynebacterium sp. HMSC072G08	14	10	0	0	28	0	0	0	1	45	0	1	35	0	20	9	14
Bacteria	Actinobacteria	Actinomycetia	Corynebacteriales	Corynebacteriaceae	Corynebacterium	Corynebacterium sp. HMSC073D01	19	109	1	90	11	78	9	0	17	259	8	26	261	23	42	27	148
Bacteria	Actinobacteria	Actinomycetia	Corynebacteriales	Corynebacteriaceae	Corynebacterium	Corynebacterium sp. HMSC074A01	13	143	0	166	28	27	20	17	18	177	27	29	126	118	37	89	151
Bacteria	Actinobacteria	Actinomycetia	Corynebacteriales	Corynebacteriaceae	Corynebacterium	Corynebacterium sp. HMSC074A09	23	88	0	33	0	43	9	38	0	107	18	17	50	0	18	15	197
Bacteria	Actinobacteria	Actinomycetia	Corynebacteriales	Corynebacteriaceae	Corynebacterium	Corynebacterium sp. HMSC074C01	47	124	0	43	17	53	34	13	47	367	122	146	198	1	71	121	1031
Bacteria	Actinobacteria	Actinomycetia	Corynebacteriales	Corynebacteriaceae	Corynebacterium	Corynebacterium sp. HMSC074C05	26	28	0	65	0	0	0	0	45	109	0	238	53	0	2	25	167
Bacteria	Actinobacteria	Actinomycetia	Corynebacteriales	Corynebacteriaceae	Corynebacterium	Corynebacterium sp. HMSC074E01	21	34	0	0	0	2	6	0	67	96	24	79	114	7	12	2	88
Bacteria	Actinobacteria	Actinomycetia	Corynebacteriales	Corynebacteriaceae	Corynebacterium	Corynebacterium sp. HMSC074H12	3	44	0	1	2	0	13	0	0	52	27	0	28	38	0	38	1
Bacteria	Actinobacteria	Actinomycetia	Corynebacteriales	Corynebacteriaceae	Corynebacterium	Corynebacterium sp. HMSC075D04	0	12	0	35	0	30	0	8	12	74	24	61	18	20	0	1	118
Bacteria	Actinobacteria	Actinomycetia	Corynebacteriales	Corynebacteriaceae	Corynebacterium	Corynebacterium sp. HMSC076D02	4	52	0	42	17	47	27	6	0	129	0	0	47	24	31	26	32
Bacteria	Actinobacteria	Actinomycetia	Corynebacteriales	Corynebacteriaceae	Corynebacterium	Corynebacterium sp. HMSC076G08	24	12	0	0	0	49	0	0	1	57	1	16	56	54	43	35	60
Bacteria	Actinobacteria	Actinomycetia	Corynebacteriales	Corynebacteriaceae	Corynebacterium	Corynebacterium sp. HMSC077B05	24	49	0	64	0	31	5	20	16	34	0	29	18	17	11	5	3
Bacteria	Actinobacteria	Actinomycetia	Corynebacteriales	Corynebacteriaceae	Corynebacterium	Corynebacterium sp. HMSC077C02	0	4	0	0	0	12	0	0	0	0	0	0	0	0	1	2	1
Bacteria	Actinobacteria	Actinomycetia	Corynebacteriales	Corynebacteriaceae	Corynebacterium	Corynebacterium sp. HMSC077G01	0	40	0	0	56	11	0	3	13	147	26	0	92	8	0	12	46
Bacteria	Actinobacteria	Actinomycetia	Corynebacteriales	Corynebacteriaceae	Corynebacterium	Corynebacterium sp. HMSC078A10	31	60	0	33	33	27	14	64	153	159	43	44	231	18	85	95	870
Bacteria	Actinobacteria	Actinomycetia	Corynebacteriales	Corynebacteriaceae	Corynebacterium	Corynebacterium sp. HMSC078H07	825	5052	9	1377	962	1371	489	368	1288	5854	850	1282	8044	791	1507	3014	2948
Bacteria	Actinobacteria	Actinomycetia	Corynebacteriales	Corynebacteriaceae	Corynebacterium	Corynebacterium sp. HMSC08A12	41	101	0	29	0	41	22	0	1	51	56	23	205	1	40	33	63
Bacteria	Actinobacteria	Actinomycetia	Corynebacteriales	Corynebacteriaceae	Corynebacterium	Corynebacterium sp. HMSC08C04	11	91	0	58	87	1	16	25	22	179	0	28	150	49	85	28	61
Bacteria	Actinobacteria	Actinomycetia	Corynebacteriales	Corynebacteriaceae	Corynebacterium	Corynebacterium sp. HMSC08D02	4	57	0	86	30	0	5	24	22	286	16	2	96	0	36	29	143
Bacteria	Actinobacteria	Actinomycetia	Corynebacteriales	Corynebacteriaceae	Corynebacterium	Corynebacterium sp. HMSC08F01	15	90	0	49	6	76	2	15	0	108	4	0	50	0	40	5	87
Bacteria	Actinobacteria	Actinomycetia	Corynebacteriales	Corynebacteriaceae	Corynebacterium	Corynebacterium sp. HMSC11D10	21	84	0	33	6	77	8	0	1	321	14	0	157	30	51	17	9
Bacteria	Actinobacteria	Actinomycetia	Corynebacteriales	Corynebacteriaceae	Corynebacterium	Corynebacterium sp. HMSC11E11	1	85	1	59	44	4	8	1	0	142	3	1	82	41	14	11	53
Bacteria	Actinobacteria	Actinomycetia	Corynebacteriales	Corynebacteriaceae	Corynebacterium	Corynebacterium sp. HMSC22B11	30	25	0	0	18	11	3	21	0	84	25	0	120	41	0	4	1
Bacteria	Actinobacteria	Actinomycetia	Corynebacteriales	Corynebacteriaceae	Corynebacterium	Corynebacterium sp. HMSC27B11	0	10	0	28	0	30	12	0	2	5	0	1	34	67	0	43	37
Bacteria	Actinobacteria	Actinomycetia	Corynebacteriales	Corynebacteriaceae	Corynebacterium	Corynebacterium sp. HMSC28B08	0	50	2	21	25	19	15	1	22	46	27	1	64	29	25	13	62
Bacteria	Actinobacteria	Actinomycetia	Corynebacteriales	Corynebacteriaceae	Corynebacterium	Corynebacterium sp. HMSC29G08	29	224	0	73	21	46	24	37	60	313	76	0	306	98	99	65	265
Bacteria	Actinobacteria	Actinomycetia	Corynebacteriales	Corynebacteriaceae	Corynebacterium	Corynebacterium sp. HMSC30G07	1	17	0	1	31	10	0	1	13	57	13	0	51	24	0	1	38
Bacteria	Actinobacteria	Actinomycetia	Corynebacteriales	Corynebacteriaceae	Corynebacterium	Corynebacterium sp. J010B-136	0	5	0	0	1	25	1	2	0	2	0	0	28	32	0	10	1
Bacteria	Actinobacteria	Actinomycetia	Corynebacteriales	Corynebacteriaceae	Corynebacterium	Corynebacterium sp. KPL1817	12	0	0	0	0	23	0	0	0	4	16	0	0	8	3	24	0
Bacteria	Actinobacteria	Actinomycetia	Corynebacteriales	Corynebacteriaceae	Corynebacterium	Corynebacterium sp. KPL1818	53	221	1	147	14	70	37	28	75	286	87	19	157	206	122	25	152
Bacteria	Actinobacteria	Actinomycetia	Corynebacteriales	Corynebacteriaceae	Corynebacterium	Corynebacterium sp. KPL1821	0	28	0	27	0	35	11	0	17	57	0	0	75	4	0	15	47
Bacteria	Actinobacteria	Actinomycetia	Corynebacteriales	Corynebacteriaceae	Corynebacterium	Corynebacterium sp. KPL1824	22	147	0	61	1	81	38	15	18	241	28	40	197	32	143	35	214
Bacteria	Actinobacteria	Actinomycetia	Corynebacteriales	Corynebacteriaceae	Corynebacterium	Corynebacterium sp. KPL1856	22	140	0	8	0	32	26	18	89	121	70	54	237	142	77	83	96
Bacteria	Actinobacteria	Actinomycetia	Corynebacteriales	Corynebacteriaceae	Corynebacterium	Corynebacterium sp. KPL1857	0	14	0	33	0	0	4	0	34	79	0	2	93	0	2	17	63
Bacteria	Actinobacteria	Actinomycetia	Corynebacteriales	Corynebacteriaceae	Corynebacterium	Corynebacterium sp. KPL1859	0	14	0	1	0	0	0	0	0	48	0	24	30	13	0	2	48
Bacteria	Actinobacteria	Actinomycetia	Corynebacteriales	Corynebacteriaceae	Corynebacterium	Corynebacterium sp. KPL1989	22	25	0	10	11	106	19	15	36	80	27	0	176	15	57	45	235
Bacteria	Actinobacteria	Actinomycetia	Corynebacteriales	Corynebacteriaceae	Corynebacterium	Corynebacterium sp. KPL2004	0	0	0	0	36	0	0	0	0	6	0	0	0	0	0	14	0
Bacteria	Actinobacteria	Actinomycetia	Corynebacteriales	Corynebacteriaceae	Corynebacterium	Corynebacterium sp. LK10	0	62	1	51	1	1	18	16	21	56	5	6	73	0	0	14	73
Bacteria	Actinobacteria	Actinomycetia	Corynebacteriales	Corynebacteriaceae	Corynebacterium	Corynebacterium sp. LK14	41	431	4	124	58	81	53	14	19	447	31	70	367	79	172	133	352
Bacteria	Actinobacteria	Actinomycetia	Corynebacteriales	Corynebacteriaceae	Corynebacterium	Corynebacterium sp. LK28	0	0	0	0	0	0	0	0	7	9	0	0	35	0	0	12	24
Bacteria	Actinobacteria	Actinomycetia	Corynebacteriales	Corynebacteriaceae	Corynebacterium	Corynebacterium sp. LMM-1652	11	75	0	1	0	16	1	35	0	148	0	102	91	55	154	47	82
Bacteria	Actinobacteria	Actinomycetia	Corynebacteriales	Corynebacteriaceae	Corynebacterium	Corynebacterium sp. Marseille-P4321	95	216	0	101	41	31	12	12	90	638	29	62	161	32	149	140	218
Bacteria	Actinobacteria	Actinomycetia	Corynebacteriales	Corynebacteriaceae	Corynebacterium	Corynebacterium sp. Marseille-Q2823	1	55	0	66	1	9	8	0	13	199	36	40	98	10	34	12	263
Bacteria	Actinobacteria	Actinomycetia	Corynebacteriales	Corynebacteriaceae	Corynebacterium	Corynebacterium sp. Marseille-Q3630	50	107	0	34	38	149	23	36	89	228	52	62	228	143	123	99	322
Bacteria	Actinobacteria	Actinomycetia	Corynebacteriales	Corynebacteriaceae	Corynebacterium	Corynebacterium sp. MC1420	0	78	0	17	22	37	2	0	18	81	24	18	80	25	56	28	142
Bacteria	Actinobacteria	Actinomycetia	Corynebacteriales	Corynebacteriaceae	Corynebacterium	Corynebacterium sp. MC1482	1	30	0	0	0	34	7	0	14	93	23	10	19	0	1	15	42
Bacteria	Actinobacteria	Actinomycetia	Corynebacteriales	Corynebacteriaceae	Corynebacterium	Corynebacterium sp. MC3	0	75	0	3	0	16	1	0	0	149	3	33	113	28	54	49	55
Bacteria	Actinobacteria	Actinomycetia	Corynebacteriales	Corynebacteriaceae	Corynebacterium	Corynebacterium sp. NML 120412	20	110	1	21	22	64	0	14	24	133	16	2	98	67	83	197	0
Bacteria	Actinobacteria	Actinomycetia	Corynebacteriales	Corynebacteriaceae	Corynebacterium	Corynebacterium sp. NML 150383	56	168	0	0	49	47	52	25	35	188	14	82	310	8	96	371	31
Bacteria	Actinobacteria	Actinomycetia	Corynebacteriales	Corynebacteriaceae	Corynebacterium	Corynebacterium sp. NML120713	9	40	0	15	18	0	0	0	0	61	17	1	20	15	19	34	7
Bacteria	Actinobacteria	Actinomycetia	Corynebacteriales	Corynebacteriaceae	Corynebacterium	Corynebacterium sp. NML130628	0	52	2	19	45	16	0	14	58	81	27	0	130	15	35	32	79
Bacteria	Actinobacteria	Actinomycetia	Corynebacteriales	Corynebacteriaceae	Corynebacterium	Corynebacterium sp. NML140438	62	65	1	70	28	83	52	2	14	118	3	27	149	8	22	24	260
Bacteria	Actinobacteria	Actinomycetia	Corynebacteriales	Corynebacteriaceae	Corynebacterium	Corynebacterium sp. NML180780	9	160	0	29	38	17	24	0	28	168	5	1	188	42	4	184	41
Bacteria	Actinobacteria	Actinomycetia	Corynebacteriales	Corynebacteriaceae	Corynebacterium	Corynebacterium sp. NML93-0612	3	77	1	32	19	328	8	46	80	60	12	33	144	80	36	9	165
Bacteria	Actinobacteria	Actinomycetia	Corynebacteriales	Corynebacteriaceae	Corynebacterium	Corynebacterium sp. NML98-0116	0	79	0	0	0	0	7	9	0	42	54	0	39	22	33	14	48
Bacteria	Actinobacteria	Actinomycetia	Corynebacteriales	Corynebacteriaceae	Corynebacterium	Corynebacterium sp. Sa1YVA5	0	5	1	21	0	29	5	5	6	27	11	0	83	138	1	4	103
Bacteria	Actinobacteria	Actinomycetia	Corynebacteriales	Corynebacteriaceae	Corynebacterium	Corynebacterium sp. sy039	0	7	0	1	0	0	0	0	0	11	0	0	32	0	26	4	0
Bacteria	Actinobacteria	Actinomycetia	Corynebacteriales	Corynebacteriaceae	Corynebacterium	Corynebacterium sp. YIM 101343	0	45	0	27	80	1	27	21	44	129	27	1	163	140	77	15	81
Bacteria	Actinobacteria	Actinomycetia	Corynebacteriales	Corynebacteriaceae	Corynebacterium	Corynebacterium sp. zg-336	63	22	20	16	21	16	86	68	0	0	0	0	0	1	2	4	0
Bacteria	Actinobacteria	Actinomycetia	Corynebacteriales	Corynebacteriaceae	Corynebacterium	Corynebacterium sp. zg-913	213	703	0	205	184	331	105	83	326	1867	129	310	907	254	254	280	454
Bacteria	Actinobacteria	Actinomycetia	Corynebacteriales	Corynebacteriaceae	Corynebacterium	Corynebacterium sp. zg-915	121	659	0	566	190	451	67	149	231	3211	210	102	1160	225	279	212	537
Bacteria	Actinobacteria	Actinomycetia	Corynebacteriales	Corynebacteriaceae	Corynebacterium	Corynebacterium sp. zg-917	9	23	3	1	1	42	3	9	1	10	0	1	55	0	0	4	0
Bacteria	Actinobacteria	Actinomycetia	Corynebacteriales	Corynebacteriaceae	Corynebacterium	Corynebacterium sp. ZJ-621	0	29	0	0	0	2	0	3	38	19	0	0	6	0	24	5	0
Bacteria	Actinobacteria	Actinomycetia	Corynebacteriales	Corynebacteriaceae	Corynebacterium	Corynebacterium sp.	107	568	2	406	182	295	74	242	304	1037	208	397	1018	281	443	210	575
Bacteria	Actinobacteria	Actinomycetia	Corynebacteriales	Corynebacteriaceae	Corynebacterium	Corynebacterium sphenisci	38	56	2	49	37	106	12	54	55	129	43	1	99	58	65	69	48
Bacteria	Actinobacteria	Actinomycetia	Corynebacteriales	Corynebacteriaceae	Corynebacterium	Corynebacterium spheniscorum	4	24	0	3	30	57	0	66	4	89	6	1	147	122	115	9	102
Bacteria	Actinobacteria	Actinomycetia	Corynebacteriales	Corynebacteriaceae	Corynebacterium	Corynebacterium sputi	2	73	4	46	20	58	5	18	19	44	3	15	79	51	3	24	101
Bacteria	Actinobacteria	Actinomycetia	Corynebacteriales	Corynebacteriaceae	Corynebacterium	Corynebacterium stationis	32	116	0	105	1	14	2	46	95	110	39	74	142	67	1	27	152
Bacteria	Actinobacteria	Actinomycetia	Corynebacteriales	Corynebacteriaceae	Corynebacterium	Corynebacterium striatum	365	1530	6	770	316	647	231	379	515	3087	458	846	2039	710	912	577	2891
Bacteria	Actinobacteria	Actinomycetia	Corynebacteriales	Corynebacteriaceae	Corynebacterium	Corynebacterium suranareeae	1	62	1	13	10	66	18	54	0	36	27	29	133	50	1	50	68
Bacteria	Actinobacteria	Actinomycetia	Corynebacteriales	Corynebacteriaceae	Corynebacterium	Corynebacterium tapiri	32	131	2	30	15	126	9	28	51	237	45	87	250	126	94	73	204
Bacteria	Actinobacteria	Actinomycetia	Corynebacteriales	Corynebacteriaceae	Corynebacterium	Corynebacterium terpenotabidum	16	102	1	23	22	98	11	6	83	62	9	0	151	221	64	70	136
Bacteria	Actinobacteria	Actinomycetia	Corynebacteriales	Corynebacteriaceae	Corynebacterium	Corynebacterium testudinoris	3	87	1	21	23	62	16	19	81	159	15	11	320	145	45	35	88
Bacteria	Actinobacteria	Actinomycetia	Corynebacteriales	Corynebacteriaceae	Corynebacterium	Corynebacterium timonense	46	189	0	77	43	108	38	17	30	300	44	100	356	207	45	56	697
Bacteria	Actinobacteria	Actinomycetia	Corynebacteriales	Corynebacteriaceae	Corynebacterium	Corynebacterium tuberculostearicum	4811	24744	41	8455	4718	8769	3065	2883	5977	36251	4279	6988	28388	8184	12848	9200	77412
Bacteria	Actinobacteria	Actinomycetia	Corynebacteriales	Corynebacteriaceae	Corynebacterium	Corynebacterium tuscaniense	354	1787	0	500	398	625	153	314	549	2439	334	524	2324	646	699	427	1260
Bacteria	Actinobacteria	Actinomycetia	Corynebacteriales	Corynebacteriaceae	Corynebacterium	Corynebacterium ulcerans	195	549	2	420	48	551	150	79	346	615	208	500	769	302	282	281	729
Bacteria	Actinobacteria	Actinomycetia	Corynebacteriales	Corynebacteriaceae	Corynebacterium	Corynebacterium ulceribovis	2	52	0	66	27	155	5	14	44	96	1	33	117	280	78	1	59
Bacteria	Actinobacteria	Actinomycetia	Corynebacteriales	Corynebacteriaceae	Corynebacterium	Corynebacterium urealyticum	796	4831	1	1761	920	1594	384	526	707	6304	848	1873	6104	1451	1443	1167	4512
Bacteria	Actinobacteria	Actinomycetia	Corynebacteriales	Corynebacteriaceae	Corynebacterium	Corynebacterium ureicelerivorans	994	4741	1	2236	1162	2938	849	960	1948	11044	1317	1783	7516	1791	2827	1767	3176
Bacteria	Actinobacteria	Actinomycetia	Corynebacteriales	Corynebacteriaceae	Corynebacterium	Corynebacterium urinapleomorphum	1422	8068	5	2384	1572	2476	805	929	1354	10074	1415	1640	9427	1726	3089	1937	3741
Bacteria	Actinobacteria	Actinomycetia	Corynebacteriales	Corynebacteriaceae	Corynebacterium	Corynebacterium uterequi	32	55	0	134	6	75	8	13	64	82	20	1	51	1	90	16	211
Bacteria	Actinobacteria	Actinomycetia	Corynebacteriales	Corynebacteriaceae	Corynebacterium	Corynebacterium variabile	25	137	1	27	133	107	26	61	103	238	50	92	200	204	188	39	105
Bacteria	Actinobacteria	Actinomycetia	Corynebacteriales	Corynebacteriaceae	Corynebacterium	Corynebacterium vitaeruminis	59	189	1	134	25	334	37	0	108	199	149	338	324	150	175	70	273
Bacteria	Actinobacteria	Actinomycetia	Corynebacteriales	Corynebacteriaceae	Corynebacterium	Corynebacterium xerosis	30	67	2	58	19	92	72	14	23	188	15	218	331	203	68	37	238
Bacteria	Actinobacteria	Actinomycetia	Corynebacteriales	Dietziaceae	Dietzia	Dietzia aerolata	3	73	2	67	34	91	5	35	18	103	61	25	120	76	48	50	10
Bacteria	Actinobacteria	Actinomycetia	Corynebacteriales	Dietziaceae	Dietzia	Dietzia alimentaria	40	163	0	95	40	116	17	61	1	172	28	223	333	396	37	8	62
Bacteria	Actinobacteria	Actinomycetia	Corynebacteriales	Dietziaceae	Dietzia	Dietzia cercidiphylli	0	3	2	0	13	0	1	2	3	0	53	0	56	0	0	7	1
Bacteria	Actinobacteria	Actinomycetia	Corynebacteriales	Dietziaceae	Dietzia	Dietzia cinnamea	57	55	0	33	8	108	11	29	41	47	9	40	60	17	9	35	87
Bacteria	Actinobacteria	Actinomycetia	Corynebacteriales	Dietziaceae	Dietzia	Dietzia kunjamensis	19	64	1	86	1	87	13	1	24	121	7	0	113	38	1	2	63
Bacteria	Actinobacteria	Actinomycetia	Corynebacteriales	Dietziaceae	Dietzia	Dietzia lutea	10	10	1	23	4	10	0	17	0	22	0	0	48	129	13	4	1
Bacteria	Actinobacteria	Actinomycetia	Corynebacteriales	Dietziaceae	Dietzia	Dietzia maris	2555	5854	16	3826	2030	4409	1794	2106	3191	9936	2303	2583	7117	3348	5385	5920	5698
Bacteria	Actinobacteria	Actinomycetia	Corynebacteriales	Dietziaceae	Dietzia	Dietzia natronolimnaea	2	35	1	1	22	45	0	8	34	82	1	54	38	52	0	19	87
Bacteria	Actinobacteria	Actinomycetia	Corynebacteriales	Dietziaceae	Dietzia	Dietzia papillomatosis	0	6	2	43	0	0	0	0	0	0	0	0	12	0	26	12	0
Bacteria	Actinobacteria	Actinomycetia	Corynebacteriales	Dietziaceae	Dietzia	Dietzia psychralcaliphila	13	80	0	1	0	67	3	10	31	66	1	0	4	1	10	16	30
Bacteria	Actinobacteria	Actinomycetia	Corynebacteriales	Dietziaceae	Dietzia	Dietzia sp. 111N12-1	0	0	0	0	0	13	4	0	0	32	1	1	14	28	0	5	1
Bacteria	Actinobacteria	Actinomycetia	Corynebacteriales	Dietziaceae	Dietzia	Dietzia sp. Alg238-R159	22	24	0	0	0	12	5	0	0	45	16	0	54	2	127	14	0
Bacteria	Actinobacteria	Actinomycetia	Corynebacteriales	Dietziaceae	Dietzia	Dietzia sp. ANT_WB102	16	23	0	28	15	18	38	11	2	62	8	36	85	26	8	9	59
Bacteria	Actinobacteria	Actinomycetia	Corynebacteriales	Dietziaceae	Dietzia	Dietzia sp. B44	0	0	0	0	0	0	0	0	22	0	0	0	50	0	0	6	11
Bacteria	Actinobacteria	Actinomycetia	Corynebacteriales	Dietziaceae	Dietzia	Dietzia sp. CQ4	1	36	0	0	0	22	17	13	0	30	0	0	113	382	0	22	0
Bacteria	Actinobacteria	Actinomycetia	Corynebacteriales	Dietziaceae	Dietzia	Dietzia sp. DQ12-45-1b	19	10	0	89	0	22	5	13	0	31	2	0	18	0	0	17	0
Bacteria	Actinobacteria	Actinomycetia	Corynebacteriales	Dietziaceae	Dietzia	Dietzia sp. DQ12-76	0	0	0	0	0	0	0	0	0	0	0	0	0	0	0	5	0
Bacteria	Actinobacteria	Actinomycetia	Corynebacteriales	Dietziaceae	Dietzia	Dietzia sp. HMSC21D01	12	31	0	64	37	46	0	0	0	0	5	7	9	0	24	9	1
Bacteria	Actinobacteria	Actinomycetia	Corynebacteriales	Dietziaceae	Dietzia	Dietzia sp. MeA6-2017	0	32	0	0	0	58	0	0	0	0	0	1	49	0	2	10	10
Bacteria	Actinobacteria	Actinomycetia	Corynebacteriales	Dietziaceae	Dietzia	Dietzia sp. oral taxon 368	1	0	1	34	0	7	28	19	25	46	22	17	18	6	8	12	24
Bacteria	Actinobacteria	Actinomycetia	Corynebacteriales	Dietziaceae	Dietzia	Dietzia sp. SLG310A2-38A2	0	75	0	2	39	0	0	16	11	30	0	21	80	15	27	8	0
Bacteria	Actinobacteria	Actinomycetia	Corynebacteriales	Dietziaceae	Dietzia	Dietzia timorensis	198	637	1	319	112	436	116	84	124	693	552	87	988	450	254	251	318
Bacteria	Actinobacteria	Actinomycetia	Corynebacteriales	Gordoniaceae	Gordonia	Gordonia aichiensis	102	289	0	120	58	74	58	32	253	113	135	39	681	457	280	67	241
Bacteria	Actinobacteria	Actinomycetia	Corynebacteriales	Gordoniaceae	Gordonia	Gordonia alkanivorans	0	26	0	19	64	12	12	40	0	37	1	39	89	44	52	27	0
Bacteria	Actinobacteria	Actinomycetia	Corynebacteriales	Gordoniaceae	Gordonia	Gordonia amarae	82	235	121	47	150	308	46	24	114	246	66	3	219	430	7	50	202
Bacteria	Actinobacteria	Actinomycetia	Corynebacteriales	Gordoniaceae	Gordonia	Gordonia amicalis	17	35	0	22	44	6	12	4	0	37	18	99	56	74	87	21	42
Bacteria	Actinobacteria	Actinomycetia	Corynebacteriales	Gordoniaceae	Gordonia	Gordonia araii	37	87	0	23	1	23	17	18	10	83	34	50	124	171	117	57	31
Bacteria	Actinobacteria	Actinomycetia	Corynebacteriales	Gordoniaceae	Gordonia	Gordonia bronchialis	38	125	8	147	236	159	46	47	118	214	153	85	407	358	263	86	183
Bacteria	Actinobacteria	Actinomycetia	Corynebacteriales	Gordoniaceae	Gordonia	Gordonia crocea	17	20	2	57	29	152	27	15	19	30	40	2	116	150	27	43	9
Bacteria	Actinobacteria	Actinomycetia	Corynebacteriales	Gordoniaceae	Gordonia	Gordonia desulfuricans	30	35	0	0	45	11	14	3	19	40	63	115	228	386	1	55	1
Bacteria	Actinobacteria	Actinomycetia	Corynebacteriales	Gordoniaceae	Gordonia	Gordonia effusa	7	34	1	51	14	160	7	5	14	98	26	35	73	147	13	18	109
Bacteria	Actinobacteria	Actinomycetia	Corynebacteriales	Gordoniaceae	Gordonia	Gordonia hankookensis	0	5	0	0	0	0	0	0	0	12	0	29	1	44	1	19	27
Bacteria	Actinobacteria	Actinomycetia	Corynebacteriales	Gordoniaceae	Gordonia	Gordonia hirsuta	62	116	0	142	80	192	18	45	56	93	72	180	302	323	199	71	207
Bacteria	Actinobacteria	Actinomycetia	Corynebacteriales	Gordoniaceae	Gordonia	Gordonia humi	61	92	3	83	24	34	48	40	70	37	53	7	261	171	27	67	31
Bacteria	Actinobacteria	Actinomycetia	Corynebacteriales	Gordoniaceae	Gordonia	Gordonia hydrophobica	65	68	0	30	21	46	19	28	43	54	8	0	189	180	53	38	45
Bacteria	Actinobacteria	Actinomycetia	Corynebacteriales	Gordoniaceae	Gordonia	Gordonia insulae	0	116	1	34	32	47	28	3	42	225	78	24	190	208	223	66	226
Bacteria	Actinobacteria	Actinomycetia	Corynebacteriales	Gordoniaceae	Gordonia	Gordonia iterans	73	198	2	83	143	213	38	83	106	115	99	39	253	213	226	136	150
Bacteria	Actinobacteria	Actinomycetia	Corynebacteriales	Gordoniaceae	Gordonia	Gordonia jacobaea	34	114	0	41	38	44	5	11	18	58	13	2	383	35	1	12	71
Bacteria	Actinobacteria	Actinomycetia	Corynebacteriales	Gordoniaceae	Gordonia	Gordonia jinhuaensis	205	111	184	82	63	138	31	98	63	231	64	112	540	592	104	105	220
Bacteria	Actinobacteria	Actinomycetia	Corynebacteriales	Gordoniaceae	Gordonia	Gordonia lacunae	54	33	1	11	52	85	28	0	14	31	44	15	61	62	66	7	97
Bacteria	Actinobacteria	Actinomycetia	Corynebacteriales	Gordoniaceae	Gordonia	Gordonia malaquae	149	66	131	48	46	67	554	412	41	55	14	141	269	262	94	21	23
Bacteria	Actinobacteria	Actinomycetia	Corynebacteriales	Gordoniaceae	Gordonia	Gordonia namibiensis	0	30	0	0	0	0	5	0	12	36	13	0	21	21	0	8	6
Bacteria	Actinobacteria	Actinomycetia	Corynebacteriales	Gordoniaceae	Gordonia	Gordonia neofelifaecis	20	43	1	43	0	17	31	47	11	65	8	81	134	77	70	23	80
Bacteria	Actinobacteria	Actinomycetia	Corynebacteriales	Gordoniaceae	Gordonia	Gordonia oryzae	3	62	0	1	18	25	5	25	26	98	49	45	99	12	58	30	110
Bacteria	Actinobacteria	Actinomycetia	Corynebacteriales	Gordoniaceae	Gordonia	Gordonia otitidis	162	1085	0	390	551	280	56	190	368	1698	171	447	4301	999	371	221	414
Bacteria	Actinobacteria	Actinomycetia	Corynebacteriales	Gordoniaceae	Gordonia	Gordonia paraffinivorans	735	206	1	242	174	182	110	51	291	435	132	223	383	578	302	149	253
Bacteria	Actinobacteria	Actinomycetia	Corynebacteriales	Gordoniaceae	Gordonia	Gordonia phthalatica	29	24	15	2	17	22	9	47	37	92	15	1	43	133	319	63	91
Bacteria	Actinobacteria	Actinomycetia	Corynebacteriales	Gordoniaceae	Gordonia	Gordonia polyisoprenivorans	251	2201	1	720	329	513	211	283	351	1960	440	331	6799	750	747	507	1104
Bacteria	Actinobacteria	Actinomycetia	Corynebacteriales	Gordoniaceae	Gordonia	Gordonia rhizosphera	9	36	3	40	83	74	11	30	19	152	38	48	199	679	209	25	85
Bacteria	Actinobacteria	Actinomycetia	Corynebacteriales	Gordoniaceae	Gordonia	Gordonia rubripertincta	19	68	3	29	23	49	13	1	40	163	15	47	92	59	169	51	24
Bacteria	Actinobacteria	Actinomycetia	Corynebacteriales	Gordoniaceae	Gordonia	Gordonia shandongensis	7	63	6	2	69	124	24	6	38	109	20	58	137	313	66	54	81
Bacteria	Actinobacteria	Actinomycetia	Corynebacteriales	Gordoniaceae	Gordonia	Gordonia sihwensis	0	10	0	0	22	57	5	0	0	0	0	0	87	32	1	5	39
Bacteria	Actinobacteria	Actinomycetia	Corynebacteriales	Gordoniaceae	Gordonia	Gordonia soli	52	104	2	39	23	104	30	20	86	64	18	25	260	353	132	78	205
Bacteria	Actinobacteria	Actinomycetia	Corynebacteriales	Gordoniaceae	Gordonia	Gordonia sp. 1D	0	0	0	0	0	0	0	0	0	0	6	17	1	0	0	7	0
Bacteria	Actinobacteria	Actinomycetia	Corynebacteriales	Gordoniaceae	Gordonia	Gordonia sp. 852002-10350_SCH5691597	21	267	1	27	137	16	12	24	77	164	66	56	820	93	63	41	121
Bacteria	Actinobacteria	Actinomycetia	Corynebacteriales	Gordoniaceae	Gordonia	Gordonia sp. 852002-50395_SCH5434458	0	10	0	66	27	11	18	9	0	44	0	23	160	3	61	29	0
Bacteria	Actinobacteria	Actinomycetia	Corynebacteriales	Gordoniaceae	Gordonia	Gordonia sp. 852002-51296_SCH5728562-b	28	356	0	101	125	84	14	57	53	260	64	25	1113	160	129	37	220
Bacteria	Actinobacteria	Actinomycetia	Corynebacteriales	Gordoniaceae	Gordonia	Gordonia sp. CNJ-863	0	10	0	72	1	16	5	0	1	29	0	50	47	2	85	1	7
Bacteria	Actinobacteria	Actinomycetia	Corynebacteriales	Gordoniaceae	Gordonia	Gordonia sp. GAMMA	0	0	0	0	0	0	0	0	0	0	0	0	0	0	0	1	1
Bacteria	Actinobacteria	Actinomycetia	Corynebacteriales	Gordoniaceae	Gordonia	Gordonia sp. HNM0687	13	46	1	34	10	61	25	29	22	86	13	2	126	200	184	13	59
Bacteria	Actinobacteria	Actinomycetia	Corynebacteriales	Gordoniaceae	Gordonia	Gordonia sp. HS-NH1	17	6	0	39	0	3	2	0	0	58	0	0	49	27	107	5	0
Bacteria	Actinobacteria	Actinomycetia	Corynebacteriales	Gordoniaceae	Gordonia	Gordonia sp. i37	20	177	0	48	46	28	25	16	27	284	37	74	281	13	79	9	33
Bacteria	Actinobacteria	Actinomycetia	Corynebacteriales	Gordoniaceae	Gordonia	Gordonia sp. IITR100	4	6	0	0	0	70	7	16	0	84	27	20	45	0	1	4	0
Bacteria	Actinobacteria	Actinomycetia	Corynebacteriales	Gordoniaceae	Gordonia	Gordonia sp. JH63	0	69	0	2	10	11	2	0	3	22	0	0	43	27	38	4	18
Bacteria	Actinobacteria	Actinomycetia	Corynebacteriales	Gordoniaceae	Gordonia	Gordonia sp. KTR9	17	16	0	0	0	18	14	0	24	50	7	0	97	21	23	2	0
Bacteria	Actinobacteria	Actinomycetia	Corynebacteriales	Gordoniaceae	Gordonia	Gordonia sp. NB4-1Y	7	6	1	0	0	1	5	0	0	40	0	0	21	41	14	6	2
Bacteria	Actinobacteria	Actinomycetia	Corynebacteriales	Gordoniaceae	Gordonia	Gordonia sp. OPL2	46	141	2	33	25	84	34	1	2	90	94	1	149	275	57	144	68
Bacteria	Actinobacteria	Actinomycetia	Corynebacteriales	Gordoniaceae	Gordonia	Gordonia sp. QH-12	0	0	0	0	0	0	7	0	0	9	13	0	25	0	0	3	0
Bacteria	Actinobacteria	Actinomycetia	Corynebacteriales	Gordoniaceae	Gordonia	Gordonia sp. SID5947	9	61	0	51	54	100	21	46	48	95	1	106	92	133	80	81	22
Bacteria	Actinobacteria	Actinomycetia	Corynebacteriales	Gordoniaceae	Gordonia	Gordonia sp. TBRC11910	23	103	4	12	50	306	36	8	12	111	16	33	201	507	85	65	92
Bacteria	Actinobacteria	Actinomycetia	Corynebacteriales	Gordoniaceae	Gordonia	Gordonia sp. UCD-TK1	0	39	0	0	6	6	1	0	1	88	23	0	91	69	16	18	14
Bacteria	Actinobacteria	Actinomycetia	Corynebacteriales	Gordoniaceae	Gordonia	Gordonia sp. X0973	39	24	5	26	14	20	1	7	73	65	2	1	129	120	69	41	35
Bacteria	Actinobacteria	Actinomycetia	Corynebacteriales	Gordoniaceae	Gordonia	Gordonia sp. zg691	0	46	0	0	0	13	0	0	24	30	16	24	33	12	0	23	1
Bacteria	Actinobacteria	Actinomycetia	Corynebacteriales	Gordoniaceae	Gordonia	Gordonia sp.	214	545	2	359	110	473	102	169	416	388	107	329	653	758	704	169	705
Bacteria	Actinobacteria	Actinomycetia	Corynebacteriales	Gordoniaceae	Gordonia	Gordonia spumicola	22	54	0	20	0	163	10	7	57	50	80	3	118	145	187	35	96
Bacteria	Actinobacteria	Actinomycetia	Corynebacteriales	Gordoniaceae	Gordonia	Gordonia sputi	58	525	2	99	234	91	59	24	59	288	57	101	1406	42	214	87	216
Bacteria	Actinobacteria	Actinomycetia	Corynebacteriales	Gordoniaceae	Gordonia	Gordonia terrae	22	78	0	12	145	36	30	4	17	126	40	34	168	279	28	35	81
Bacteria	Actinobacteria	Actinomycetia	Corynebacteriales	Gordoniaceae	Gordonia	Gordonia westfalica	26	18	1	0	9	90	13	10	0	121	11	27	43	49	36	4	184
Bacteria	Actinobacteria	Actinomycetia	Corynebacteriales	Lawsonellaceae	Lawsonella	Lawsonella clevelandensis	61959	170202	324	112903	50001	122889	38812	45478	72574	235815	76791	76162	290040	109554	154148	78069	142642
Bacteria	Actinobacteria	Actinomycetia	Corynebacteriales	Mycobacteriaceae	Mycobacterium	Mycobacterium ahvazicum	2	102	0	82	90	119	30	10	7	248	25	44	168	168	28	50	147
Bacteria	Actinobacteria	Actinomycetia	Corynebacteriales	Mycobacteriaceae	Mycobacterium	Mycobacterium alsense	4	59	5	20	50	75	46	33	1	112	88	56	166	231	201	89	52
Bacteria	Actinobacteria	Actinomycetia	Corynebacteriales	Mycobacteriaceae	Mycobacterium	Mycobacterium angelicum	28	73	0	45	35	24	0	47	10	103	40	152	121	9	49	30	28
Bacteria	Actinobacteria	Actinomycetia	Corynebacteriales	Mycobacteriaceae	Mycobacterium	Mycobacterium aquaticum	31	79	0	47	8	64	14	29	58	219	65	46	153	152	89	30	25
Bacteria	Actinobacteria	Actinomycetia	Corynebacteriales	Mycobacteriaceae	Mycobacterium	Mycobacterium arosiense	25	68	3	4	65	21	20	26	13	73	28	0	53	44	77	53	61
Bacteria	Actinobacteria	Actinomycetia	Corynebacteriales	Mycobacteriaceae	Mycobacterium	Mycobacterium asiaticum	182	364	7	257	213	331	106	73	167	573	234	244	836	383	528	250	387
Bacteria	Actinobacteria	Actinomycetia	Corynebacteriales	Mycobacteriaceae	Mycobacterium	Mycobacterium attenuatum	0	74	2	25	2	12	0	0	0	22	12	0	35	39	38	9	27
Bacteria	Actinobacteria	Actinomycetia	Corynebacteriales	Mycobacteriaceae	Mycobacterium	Mycobacterium avium	1098	2092	236	1018	962	1561	1180	1307	1042	3125	867	931	3295	2294	2010	1928	1955
Bacteria	Actinobacteria	Actinomycetia	Corynebacteriales	Mycobacteriaceae	Mycobacterium	Mycobacterium basiliense	12	30	1	36	80	53	1	8	9	119	6	35	79	182	44	18	15
Bacteria	Actinobacteria	Actinomycetia	Corynebacteriales	Mycobacteriaceae	Mycobacterium	Mycobacterium bohemicum	5	129	0	43	123	42	44	37	2	143	15	111	221	161	212	8	58
Bacteria	Actinobacteria	Actinomycetia	Corynebacteriales	Mycobacteriaceae	Mycobacterium	Mycobacterium botniense	17	52	5	322	2414	48602	25	25	76	213	1	210	468	1060	61	29	125
Bacteria	Actinobacteria	Actinomycetia	Corynebacteriales	Mycobacteriaceae	Mycobacterium	Mycobacterium bourgelatii	26	96	1	41	168	33	12	0	21	125	33	45	157	106	33	10	70
Bacteria	Actinobacteria	Actinomycetia	Corynebacteriales	Mycobacteriaceae	Mycobacterium	Mycobacterium branderi	11	52	4	7	280	68	9	20	55	53	29	55	223	235	58	32	52
Bacteria	Actinobacteria	Actinomycetia	Corynebacteriales	Mycobacteriaceae	Mycobacterium	Mycobacterium canettii	16	48	4	2	94	236	0	1	41	84	39	94	93	400	33	22	2
Bacteria	Actinobacteria	Actinomycetia	Corynebacteriales	Mycobacteriaceae	Mycobacterium	Mycobacterium celatum	17	76	0	5	149	137	21	50	66	80	3	29	240	81	110	40	67
Bacteria	Actinobacteria	Actinomycetia	Corynebacteriales	Mycobacteriaceae	Mycobacterium	Mycobacterium colombiense	45	337	6	120	176	193	66	22	270	372	179	63	595	664	93	316	365
Bacteria	Actinobacteria	Actinomycetia	Corynebacteriales	Mycobacteriaceae	Mycobacterium	Mycobacterium conspicuum	59	31	1	33	117	52	27	3	45	186	34	35	91	105	94	23	21
Bacteria	Actinobacteria	Actinomycetia	Corynebacteriales	Mycobacteriaceae	Mycobacterium	Mycobacterium cookii	64	115	4	148	382	85	69	30	50	217	54	60	280	326	107	46	66
Bacteria	Actinobacteria	Actinomycetia	Corynebacteriales	Mycobacteriaceae	Mycobacterium	Mycobacterium decipiens	56	72	48	37	120	33	2	10	45	81	13	33	106	166	96	45	0
Bacteria	Actinobacteria	Actinomycetia	Corynebacteriales	Mycobacteriaceae	Mycobacterium	Mycobacterium dioxanotrophicus	6	167	5	59	4	100	8	14	95	221	50	50	254	128	24	29	56
Bacteria	Actinobacteria	Actinomycetia	Corynebacteriales	Mycobacteriaceae	Mycobacterium	Mycobacterium eburneum	13	37	1	0	6	11	6	0	34	68	18	0	19	12	0	28	1
Bacteria	Actinobacteria	Actinomycetia	Corynebacteriales	Mycobacteriaceae	Mycobacterium	Mycobacterium europaeum	12	36	0	23	0	77	10	11	1	59	25	5	322	575	100	36	30
Bacteria	Actinobacteria	Actinomycetia	Corynebacteriales	Mycobacteriaceae	Mycobacterium	Mycobacterium fragae	37	97	10	147	395	91	19	75	54	148	48	130	238	506	147	25	59
Bacteria	Actinobacteria	Actinomycetia	Corynebacteriales	Mycobacteriaceae	Mycobacterium	Mycobacterium gallinarum	63	352	1	45	45	200	20	18	85	210	38	167	362	225	164	151	176
Bacteria	Actinobacteria	Actinomycetia	Corynebacteriales	Mycobacteriaceae	Mycobacterium	Mycobacterium gastri	35	60	7	13	49	104	25	24	24	83	55	68	356	434	148	34	152
Bacteria	Actinobacteria	Actinomycetia	Corynebacteriales	Mycobacteriaceae	Mycobacterium	Mycobacterium genavense	0	22	3	6	1	485	16	1	8	95	12	14	37	44	105	30	81
Bacteria	Actinobacteria	Actinomycetia	Corynebacteriales	Mycobacteriaceae	Mycobacterium	Mycobacterium gordonae	167	226	3	394	604	320	107	103	130	440	137	185	538	680	284	130	230
Bacteria	Actinobacteria	Actinomycetia	Corynebacteriales	Mycobacteriaceae	Mycobacterium	Mycobacterium grossiae	3217	23216	13	9588	3369	10737	3090	3370	4812	19307	4553	4592	25028	5252	9022	6077	12510
Bacteria	Actinobacteria	Actinomycetia	Corynebacteriales	Mycobacteriaceae	Mycobacterium	Mycobacterium haemophilum	0	13	2	66	165	76	9	25	13	122	38	29	137	162	80	23	71
Bacteria	Actinobacteria	Actinomycetia	Corynebacteriales	Mycobacteriaceae	Mycobacterium	Mycobacterium heckeshornense	37	98	11	18	213	139	26	1	136	66	13	75	310	291	109	55	168
Bacteria	Actinobacteria	Actinomycetia	Corynebacteriales	Mycobacteriaceae	Mycobacterium	Mycobacterium heidelbergense	11	57	0	34	57	32	15	0	7	79	24	24	112	151	46	12	3
Bacteria	Actinobacteria	Actinomycetia	Corynebacteriales	Mycobacteriaceae	Mycobacterium	Mycobacterium helveticum	596	1020	25	845	1136	908	386	496	724	1496	396	665	1808	1487	1109	1109	1172
Bacteria	Actinobacteria	Actinomycetia	Corynebacteriales	Mycobacteriaceae	Mycobacterium	Mycobacterium interjectum	19	42	0	49	51	70	18	45	34	98	28	65	217	148	121	44	35
Bacteria	Actinobacteria	Actinomycetia	Corynebacteriales	Mycobacteriaceae	Mycobacterium	Mycobacterium intermedium	70	194	1	181	124	73	46	40	51	298	79	194	272	197	155	154	132
Bacteria	Actinobacteria	Actinomycetia	Corynebacteriales	Mycobacteriaceae	Mycobacterium	Mycobacterium intracellulare	4358	9570	32	7067	3524	7582	3206	3392	5598	14839	3665	5472	13326	6048	9360	9429	10424
Bacteria	Actinobacteria	Actinomycetia	Corynebacteriales	Mycobacteriaceae	Mycobacterium	Mycobacterium kansasii	1443	2673	17	1975	1492	2401	727	903	1704	4833	1698	2084	4353	3158	2614	2886	3543
Bacteria	Actinobacteria	Actinomycetia	Corynebacteriales	Mycobacteriaceae	Mycobacterium	Mycobacterium kubicae	34	124	2	2	99	101	2	13	57	137	40	1	245	145	124	61	106
Bacteria	Actinobacteria	Actinomycetia	Corynebacteriales	Mycobacteriaceae	Mycobacterium	Mycobacterium kyorinense	29	86	5	78	821	130	11	13	17	116	59	243	258	511	240	72	134
Bacteria	Actinobacteria	Actinomycetia	Corynebacteriales	Mycobacteriaceae	Mycobacterium	Mycobacterium lacus	58	95	1	36	86	38	5	13	23	72	8	54	96	158	91	16	86
Bacteria	Actinobacteria	Actinomycetia	Corynebacteriales	Mycobacteriaceae	Mycobacterium	Mycobacterium lehmannii	0	14	1	0	15	23	0	1	0	25	3	0	35	3	1	19	11
Bacteria	Actinobacteria	Actinomycetia	Corynebacteriales	Mycobacteriaceae	Mycobacterium	Mycobacterium lentiflavum	1	146	0	12	19	16	12	15	43	104	18	86	235	144	3	15	1
Bacteria	Actinobacteria	Actinomycetia	Corynebacteriales	Mycobacteriaceae	Mycobacterium	Mycobacterium leprae	3961	8577	19	6348	2921	6922	2551	3408	4783	12967	4218	5453	11716	5379	7902	8728	9337
Bacteria	Actinobacteria	Actinomycetia	Corynebacteriales	Mycobacteriaceae	Mycobacterium	Mycobacterium lepraemurium	1	15	0	24	11	5	7	0	26	42	51	93	59	164	0	22	43
Bacteria	Actinobacteria	Actinomycetia	Corynebacteriales	Mycobacteriaceae	Mycobacterium	Mycobacterium lepromatosis	1	8	0	0	11	63	10	7	12	32	0	64	11	0	17	14	29
Bacteria	Actinobacteria	Actinomycetia	Corynebacteriales	Mycobacteriaceae	Mycobacterium	Mycobacterium malmoense	32	78	8	73	228	108	29	24	94	177	36	21	243	524	99	85	97
Bacteria	Actinobacteria	Actinomycetia	Corynebacteriales	Mycobacteriaceae	Mycobacterium	Mycobacterium mantenii	16	126	1	65	83	96	67	13	53	107	75	3	140	332	37	104	203
Bacteria	Actinobacteria	Actinomycetia	Corynebacteriales	Mycobacteriaceae	Mycobacterium	Mycobacterium marinum	230	216	2	304	183	239	81	59	133	367	96	271	508	290	317	145	245
Bacteria	Actinobacteria	Actinomycetia	Corynebacteriales	Mycobacteriaceae	Mycobacterium	Mycobacterium marseillense	0	62	0	72	19	4	49	5	38	47	0	2	108	63	74	27	0
Bacteria	Actinobacteria	Actinomycetia	Corynebacteriales	Mycobacteriaceae	Mycobacterium	Mycobacterium montefiorense	8	17	2	62	104	44	27	32	25	32	9	20	69	5	28	12	2
Bacteria	Actinobacteria	Actinomycetia	Corynebacteriales	Mycobacteriaceae	Mycobacterium	Mycobacterium nebraskense	163	29	3	76	15	34	10	34	3	66	44	46	48	106	174	39	8
Bacteria	Actinobacteria	Actinomycetia	Corynebacteriales	Mycobacteriaceae	Mycobacterium	Mycobacterium neglectum	18	113	4	3	3	250	29	12	92	191	40	3	217	108	157	136	167
Bacteria	Actinobacteria	Actinomycetia	Corynebacteriales	Mycobacteriaceae	Mycobacterium	Mycobacterium noviomagense	60	80	3	25	256	134	10	7	29	93	37	48	132	369	85	42	93
Bacteria	Actinobacteria	Actinomycetia	Corynebacteriales	Mycobacteriaceae	Mycobacterium	Mycobacterium novum	0	2	0	0	0	0	0	9	0	48	0	0	21	0	1	1	0
Bacteria	Actinobacteria	Actinomycetia	Corynebacteriales	Mycobacteriaceae	Mycobacterium	Mycobacterium numidiamassiliense	10	55	10	97	127	96	7	48	42	129	18	1	110	75	130	94	89
Bacteria	Actinobacteria	Actinomycetia	Corynebacteriales	Mycobacteriaceae	Mycobacterium	Mycobacterium palauense	11	160	10	157	63	78	28	4	34	202	25	53	177	254	173	69	335
Bacteria	Actinobacteria	Actinomycetia	Corynebacteriales	Mycobacteriaceae	Mycobacterium	Mycobacterium palustre	2	45	1	79	38	6	28	9	0	144	31	1	264	216	60	63	95
Bacteria	Actinobacteria	Actinomycetia	Corynebacteriales	Mycobacteriaceae	Mycobacterium	Mycobacterium paraense	17	43	0	29	1	72	0	0	1	70	4	4	120	259	9	6	48
Bacteria	Actinobacteria	Actinomycetia	Corynebacteriales	Mycobacteriaceae	Mycobacterium	Mycobacterium paraffinicum	0	6	1	64	47	28	21	0	13	31	11	27	7	33	87	22	21
Bacteria	Actinobacteria	Actinomycetia	Corynebacteriales	Mycobacteriaceae	Mycobacterium	Mycobacterium paragordonae	13	134	0	157	149	85	7	4	58	277	16	41	157	44	37	33	104
Bacteria	Actinobacteria	Actinomycetia	Corynebacteriales	Mycobacteriaceae	Mycobacterium	Mycobacterium paraintracellulare	14	19	1	32	50	208	0	0	1	39	6	47	128	353	71	25	0
Bacteria	Actinobacteria	Actinomycetia	Corynebacteriales	Mycobacteriaceae	Mycobacterium	Mycobacterium parascrofulaceum	1	26	0	1	25	1	0	5	0	1	3	1	0	58	4	2	72
Bacteria	Actinobacteria	Actinomycetia	Corynebacteriales	Mycobacteriaceae	Mycobacterium	Mycobacterium paraseoulense	2	11	0	16	46	181	24	16	20	1	28	30	14	32	4	40	1
Bacteria	Actinobacteria	Actinomycetia	Corynebacteriales	Mycobacteriaceae	Mycobacterium	Mycobacterium parmense	14	66	2	151	39	138	11	32	32	25	32	105	79	190	185	75	137
Bacteria	Actinobacteria	Actinomycetia	Corynebacteriales	Mycobacteriaceae	Mycobacterium	Mycobacterium persicum	41	15	2	46	107	124	26	2	2	110	34	29	113	99	157	47	33
Bacteria	Actinobacteria	Actinomycetia	Corynebacteriales	Mycobacteriaceae	Mycobacterium	Mycobacterium pseudokansasii	0	71	0	3	81	8	2	1	42	4	0	2	6	19	2	19	47
Bacteria	Actinobacteria	Actinomycetia	Corynebacteriales	Mycobacteriaceae	Mycobacterium	Mycobacterium pseudoshottsii	9	66	0	6	5	63	71	32	6	53	31	51	161	24	28	64	241
Bacteria	Actinobacteria	Actinomycetia	Corynebacteriales	Mycobacteriaceae	Mycobacterium	Mycobacterium rhizamassiliense	1	54	0	32	105	15	21	16	2	130	55	8	145	39	20	32	23
Bacteria	Actinobacteria	Actinomycetia	Corynebacteriales	Mycobacteriaceae	Mycobacterium	Mycobacterium riyadhense	13	91	8	154	50	35	10	31	8	59	7	55	232	104	332	29	55
Bacteria	Actinobacteria	Actinomycetia	Corynebacteriales	Mycobacteriaceae	Mycobacterium	Mycobacterium saskatchewanense	40	46	2	3	192	143	29	10	25	118	10	25	83	161	61	31	47
Bacteria	Actinobacteria	Actinomycetia	Corynebacteriales	Mycobacteriaceae	Mycobacterium	Mycobacterium scrofulaceum	100	55	2	67	66	72	11	1	37	110	8	39	101	156	93	80	65
Bacteria	Actinobacteria	Actinomycetia	Corynebacteriales	Mycobacteriaceae	Mycobacterium	Mycobacterium seoulense	0	19	1	5	18	19	3	23	0	44	0	56	26	28	0	20	5
Bacteria	Actinobacteria	Actinomycetia	Corynebacteriales	Mycobacteriaceae	Mycobacterium	Mycobacterium sherrisii	18	53	3	3	58	21	9	26	11	216	15	32	385	758	17	38	48
Bacteria	Actinobacteria	Actinomycetia	Corynebacteriales	Mycobacteriaceae	Mycobacterium	Mycobacterium shigaense	1	39	4	53	80	87	38	2	0	96	14	66	81	132	27	11	158
Bacteria	Actinobacteria	Actinomycetia	Corynebacteriales	Mycobacteriaceae	Mycobacterium	Mycobacterium shimoidei	8	19	4	17	435	84	17	10	49	179	23	98	204	425	191	40	111
Bacteria	Actinobacteria	Actinomycetia	Corynebacteriales	Mycobacteriaceae	Mycobacterium	Mycobacterium shinjukuense	25	25	1	20	280	7	9	12	126	56	3	81	210	132	70	32	51
Bacteria	Actinobacteria	Actinomycetia	Corynebacteriales	Mycobacteriaceae	Mycobacterium	Mycobacterium shottsii	0	16	1	0	1	18	20	13	0	30	2	0	70	29	36	33	1
Bacteria	Actinobacteria	Actinomycetia	Corynebacteriales	Mycobacteriaceae	Mycobacterium	Mycobacterium simiae	23	27	1	49	85	161	31	36	79	116	22	35	159	159	314	50	99
Bacteria	Actinobacteria	Actinomycetia	Corynebacteriales	Mycobacteriaceae	Mycobacterium	Mycobacterium simulans	57	125	2	6	231	53	39	23	9	92	1	95	299	219	95	62	109
Bacteria	Actinobacteria	Actinomycetia	Corynebacteriales	Mycobacteriaceae	Mycobacterium	Mycobacterium sp. 'graecum DL049'	0	0	0	0	0	0	0	0	0	0	0	0	0	0	0	1	0
Bacteria	Actinobacteria	Actinomycetia	Corynebacteriales	Mycobacteriaceae	Mycobacterium	Mycobacterium sp. 1081908.1	31	13	0	54	78	21	3	13	19	26	19	26	32	37	49	49	37
Bacteria	Actinobacteria	Actinomycetia	Corynebacteriales	Mycobacteriaceae	Mycobacterium	Mycobacterium sp. 1100029.7	307	698	3	527	307	643	200	259	381	1208	560	357	1262	689	595	657	877
Bacteria	Actinobacteria	Actinomycetia	Corynebacteriales	Mycobacteriaceae	Mycobacterium	Mycobacterium sp. 1164966.3	0	44	3	31	79	189	7	15	20	58	8	3	77	61	64	23	2
Bacteria	Actinobacteria	Actinomycetia	Corynebacteriales	Mycobacteriaceae	Mycobacterium	Mycobacterium sp. 1164985.4	2	16	0	12	2	1	0	0	0	24	7	1	44	19	69	1	88
Bacteria	Actinobacteria	Actinomycetia	Corynebacteriales	Mycobacteriaceae	Mycobacterium	Mycobacterium sp. 1165178.9	0	2	1	1	14	123	1	4	0	43	8	0	40	60	68	13	7
Bacteria	Actinobacteria	Actinomycetia	Corynebacteriales	Mycobacteriaceae	Mycobacterium	Mycobacterium sp. 1245111.1	24	150	2	161	219	124	64	25	75	110	55	19	216	290	281	61	165
Bacteria	Actinobacteria	Actinomycetia	Corynebacteriales	Mycobacteriaceae	Mycobacterium	Mycobacterium sp. 1245801.1	0	4	0	0	0	0	3	0	23	34	0	38	20	0	0	8	0
Bacteria	Actinobacteria	Actinomycetia	Corynebacteriales	Mycobacteriaceae	Mycobacterium	Mycobacterium sp. 1245805.9	3	7	1	1	4	0	0	0	0	39	10	0	28	64	93	26	105
Bacteria	Actinobacteria	Actinomycetia	Corynebacteriales	Mycobacteriaceae	Mycobacterium	Mycobacterium sp. 1245852.3	10	4	0	0	1	0	4	8	0	15	0	16	37	6	1	18	0
Bacteria	Actinobacteria	Actinomycetia	Corynebacteriales	Mycobacteriaceae	Mycobacterium	Mycobacterium sp. 1274756.6	0	74	1	0	81	68	0	11	1	61	5	2	145	262	64	56	46
Bacteria	Actinobacteria	Actinomycetia	Corynebacteriales	Mycobacteriaceae	Mycobacterium	Mycobacterium sp. 1274761.0	12	84	2	59	31	78	23	22	3	66	13	38	80	150	330	50	86
Bacteria	Actinobacteria	Actinomycetia	Corynebacteriales	Mycobacteriaceae	Mycobacterium	Mycobacterium sp. 141	0	12	0	0	2	33	28	7	17	78	45	88	131	28	77	25	13
Bacteria	Actinobacteria	Actinomycetia	Corynebacteriales	Mycobacteriaceae	Mycobacterium	Mycobacterium sp. 1423905.2	10	44	1	2	40	67	10	29	20	111	2	83	67	30	63	40	62
Bacteria	Actinobacteria	Actinomycetia	Corynebacteriales	Mycobacteriaceae	Mycobacterium	Mycobacterium sp. 1465703.0	29	48	2	17	83	58	30	2	35	49	30	47	152	327	76	29	73
Bacteria	Actinobacteria	Actinomycetia	Corynebacteriales	Mycobacteriaceae	Mycobacterium	Mycobacterium sp. 155	0	17	1	0	2	52	9	10	5	86	36	73	94	142	44	20	3
Bacteria	Actinobacteria	Actinomycetia	Corynebacteriales	Mycobacteriaceae	Mycobacterium	Mycobacterium sp. 1554424.7	2519	5662	10	3816	1888	4447	1879	2022	3171	9307	4212	3086	7268	3640	5457	5516	5786
Bacteria	Actinobacteria	Actinomycetia	Corynebacteriales	Mycobacteriaceae	Mycobacterium	Mycobacterium sp. 3519A	3	78	4	115	23	77	18	21	5	174	17	20	342	244	296	35	188
Bacteria	Actinobacteria	Actinomycetia	Corynebacteriales	Mycobacteriaceae	Mycobacterium	Mycobacterium sp. 360MFTsu5.1	0	39	0	27	7	3	0	21	28	13	1	43	19	1	0	1	0
Bacteria	Actinobacteria	Actinomycetia	Corynebacteriales	Mycobacteriaceae	Mycobacterium	Mycobacterium sp. 4858	1	6	0	0	0	0	0	0	0	27	3	0	25	26	1	1	0
Bacteria	Actinobacteria	Actinomycetia	Corynebacteriales	Mycobacteriaceae	Mycobacterium	Mycobacterium sp. 852002-10029_SCH5224772	30	19	1	0	28	3	6	20	1	88	6	20	71	18	11	78	30
Bacteria	Actinobacteria	Actinomycetia	Corynebacteriales	Mycobacteriaceae	Mycobacterium	Mycobacterium sp. 852002-40037_SCH5390672	4	14	0	1	56	0	0	0	0	21	0	7	9	3	1	16	70
Bacteria	Actinobacteria	Actinomycetia	Corynebacteriales	Mycobacteriaceae	Mycobacterium	Mycobacterium sp. 852002-50816_SCH5313054-b	28	26	2	2	13	42	3	0	1	47	19	104	26	83	43	23	1
Bacteria	Actinobacteria	Actinomycetia	Corynebacteriales	Mycobacteriaceae	Mycobacterium	Mycobacterium sp. 852002-51057_SCH5723018	21	19	3	0	51	19	7	52	8	34	22	58	30	79	82	18	77
Bacteria	Actinobacteria	Actinomycetia	Corynebacteriales	Mycobacteriaceae	Mycobacterium	Mycobacterium sp. 852002-51163_SCH5372311	21	38	0	20	1	27	6	0	52	34	1	0	95	91	66	24	49
Bacteria	Actinobacteria	Actinomycetia	Corynebacteriales	Mycobacteriaceae	Mycobacterium	Mycobacterium sp. 852002-51961_SCH5331710	0	18	1	0	32	11	7	0	0	10	0	45	5	24	34	7	33
Bacteria	Actinobacteria	Actinomycetia	Corynebacteriales	Mycobacteriaceae	Mycobacterium	Mycobacterium sp. 852002-51971_SCH5477799-a	1	11	1	45	10	21	0	25	3	30	28	0	38	111	23	8	2
Bacteria	Actinobacteria	Actinomycetia	Corynebacteriales	Mycobacteriaceae	Mycobacterium	Mycobacterium sp. 852013-50091_SCH5140682	68	39	2	71	41	197	22	50	0	149	16	29	180	292	41	28	82
Bacteria	Actinobacteria	Actinomycetia	Corynebacteriales	Mycobacteriaceae	Mycobacterium	Mycobacterium sp. 852013-51886_SCH5428379	16	39	2	19	80	36	17	15	40	73	30	23	169	165	93	41	179
Bacteria	Actinobacteria	Actinomycetia	Corynebacteriales	Mycobacteriaceae	Mycobacterium	Mycobacterium sp. 852014-52144_SCH5372336	1	32	2	0	8	40	0	3	0	48	29	0	46	83	2	18	1
Bacteria	Actinobacteria	Actinomycetia	Corynebacteriales	Mycobacteriaceae	Mycobacterium	Mycobacterium sp. ACS1612	37	57	1	24	70	108	22	16	20	173	3	21	165	184	94	40	12
Bacteria	Actinobacteria	Actinomycetia	Corynebacteriales	Mycobacteriaceae	Mycobacterium	Mycobacterium sp. ACS4331	20	120	0	84	82	155	2	6	61	139	54	44	154	59	82	80	150
Bacteria	Actinobacteria	Actinomycetia	Corynebacteriales	Mycobacteriaceae	Mycobacterium	Mycobacterium sp. AT1	12	86	5	111	36	89	17	0	39	50	6	83	135	77	17	23	71
Bacteria	Actinobacteria	Actinomycetia	Corynebacteriales	Mycobacteriaceae	Mycobacterium	Mycobacterium sp. AZCC_0083	128	207	16	32	83	442	57	38	43	289	81	126	575	840	337	58	173
Bacteria	Actinobacteria	Actinomycetia	Corynebacteriales	Mycobacteriaceae	Mycobacterium	Mycobacterium sp. BK086	0	15	0	0	0	25	0	0	0	54	0	2	0	1	0	1	14
Bacteria	Actinobacteria	Actinomycetia	Corynebacteriales	Mycobacteriaceae	Mycobacterium	Mycobacterium sp. BK558	4	47	0	29	0	18	0	3	1	86	11	1	85	52	18	42	20
Bacteria	Actinobacteria	Actinomycetia	Corynebacteriales	Mycobacteriaceae	Mycobacterium	Mycobacterium sp. D16Q16	30	8	0	0	0	17	20	0	0	24	0	73	56	1	37	14	36
Bacteria	Actinobacteria	Actinomycetia	Corynebacteriales	Mycobacteriaceae	Mycobacterium	Mycobacterium sp. D16Q20	0	0	0	0	0	0	0	0	0	0	0	0	0	0	0	11	0
Bacteria	Actinobacteria	Actinomycetia	Corynebacteriales	Mycobacteriaceae	Mycobacterium	Mycobacterium sp. D16R18	0	6	0	33	0	0	9	0	0	33	0	0	0	0	2	1	0
Bacteria	Actinobacteria	Actinomycetia	Corynebacteriales	Mycobacteriaceae	Mycobacterium	Mycobacterium sp. DBP42	0	25	0	0	13	0	4	14	0	21	4	0	53	34	61	1	0
Bacteria	Actinobacteria	Actinomycetia	Corynebacteriales	Mycobacteriaceae	Mycobacterium	Mycobacterium sp. djl-10	21	114	0	46	39	54	3	22	1	177	4	1	238	200	118	30	40
Bacteria	Actinobacteria	Actinomycetia	Corynebacteriales	Mycobacteriaceae	Mycobacterium	Mycobacterium sp. DL440	34	19	1	15	36	23	5	16	0	54	14	0	91	21	0	44	3
Bacteria	Actinobacteria	Actinomycetia	Corynebacteriales	Mycobacteriaceae	Mycobacterium	Mycobacterium sp. DL592	9	144	2	0	31	46	20	50	2	123	25	38	201	139	237	54	42
Bacteria	Actinobacteria	Actinomycetia	Corynebacteriales	Mycobacteriaceae	Mycobacterium	Mycobacterium sp. DL90	0	3	0	0	0	0	12	0	0	0	0	0	1	2	19	16	0
Bacteria	Actinobacteria	Actinomycetia	Corynebacteriales	Mycobacteriaceae	Mycobacterium	Mycobacterium sp. DL99	1	41	1	3	2	2	1	6	26	67	7	86	58	107	43	1	53
Bacteria	Actinobacteria	Actinomycetia	Corynebacteriales	Mycobacteriaceae	Mycobacterium	Mycobacterium sp. E136	2	1	1	61	43	2	1	8	0	21	0	0	48	52	2	21	0
Bacteria	Actinobacteria	Actinomycetia	Corynebacteriales	Mycobacteriaceae	Mycobacterium	Mycobacterium sp. E1386	0	1	0	0	0	0	10	0	0	44	0	0	0	0	0	6	82
Bacteria	Actinobacteria	Actinomycetia	Corynebacteriales	Mycobacteriaceae	Mycobacterium	Mycobacterium sp. E1747	2	22	1	30	1	0	16	20	0	44	15	19	95	545	58	29	34
Bacteria	Actinobacteria	Actinomycetia	Corynebacteriales	Mycobacteriaceae	Mycobacterium	Mycobacterium sp. E2327	0	38	1	0	25	87	23	23	0	31	0	17	92	1	55	19	44
Bacteria	Actinobacteria	Actinomycetia	Corynebacteriales	Mycobacteriaceae	Mycobacterium	Mycobacterium sp. E2479	0	24	1	50	13	64	35	10	5	27	9	13	93	247	94	15	99
Bacteria	Actinobacteria	Actinomycetia	Corynebacteriales	Mycobacteriaceae	Mycobacterium	Mycobacterium sp. E2497	0	9	0	0	0	0	0	26	20	13	8	0	18	8	40	31	49
Bacteria	Actinobacteria	Actinomycetia	Corynebacteriales	Mycobacteriaceae	Mycobacterium	Mycobacterium sp. E2699	27	0	2	0	0	15	4	0	0	0	0	0	22	0	13	13	43
Bacteria	Actinobacteria	Actinomycetia	Corynebacteriales	Mycobacteriaceae	Mycobacterium	Mycobacterium sp. E2733	2	16	4	78	18	4	6	21	2	56	10	7	71	56	124	50	177
Bacteria	Actinobacteria	Actinomycetia	Corynebacteriales	Mycobacteriaceae	Mycobacterium	Mycobacterium sp. E3198	2	26	1	0	1	28	8	0	0	52	7	23	18	72	44	39	41
Bacteria	Actinobacteria	Actinomycetia	Corynebacteriales	Mycobacteriaceae	Mycobacterium	Mycobacterium sp. E3339	17	50	0	56	45	31	14	32	10	54	36	20	104	111	23	44	103
Bacteria	Actinobacteria	Actinomycetia	Corynebacteriales	Mycobacteriaceae	Mycobacterium	Mycobacterium sp. E342	0	10	0	34	1	0	4	0	0	24	0	39	13	4	19	4	0
Bacteria	Actinobacteria	Actinomycetia	Corynebacteriales	Mycobacteriaceae	Mycobacterium	Mycobacterium sp. E740	18	85	2	32	53	29	2	20	47	104	35	0	89	130	152	21	39
Bacteria	Actinobacteria	Actinomycetia	Corynebacteriales	Mycobacteriaceae	Mycobacterium	Mycobacterium sp. E787	0	0	0	0	0	0	1	0	1	11	0	0	0	0	4	1	0
Bacteria	Actinobacteria	Actinomycetia	Corynebacteriales	Mycobacteriaceae	Mycobacterium	Mycobacterium sp. E796	9	36	0	0	3	42	7	0	0	13	0	57	55	84	154	18	27
Bacteria	Actinobacteria	Actinomycetia	Corynebacteriales	Mycobacteriaceae	Mycobacterium	Mycobacterium sp. E802	38	25	0	57	51	45	5	0	0	24	0	0	82	30	28	30	1
Bacteria	Actinobacteria	Actinomycetia	Corynebacteriales	Mycobacteriaceae	Mycobacterium	Mycobacterium sp. ELW1	0	142	1	106	115	32	19	0	35	63	13	40	197	88	41	4	34
Bacteria	Actinobacteria	Actinomycetia	Corynebacteriales	Mycobacteriaceae	Mycobacterium	Mycobacterium sp. ENV421	2	24	2	0	1	23	0	23	4	59	0	23	84	43	3	11	3
Bacteria	Actinobacteria	Actinomycetia	Corynebacteriales	Mycobacteriaceae	Mycobacterium	Mycobacterium sp. EPa45	50	36	2	117	85	38	29	86	8	118	25	30	231	28	66	28	179
Bacteria	Actinobacteria	Actinomycetia	Corynebacteriales	Mycobacteriaceae	Mycobacterium	Mycobacterium sp. EPG1	1	23	0	1	0	0	0	0	1	1	10	0	11	2	0	1	24
Bacteria	Actinobacteria	Actinomycetia	Corynebacteriales	Mycobacteriaceae	Mycobacterium	Mycobacterium sp. GA-1199	1	85	0	0	56	2	1	0	2	10	16	36	70	7	91	31	5
Bacteria	Actinobacteria	Actinomycetia	Corynebacteriales	Mycobacteriaceae	Mycobacterium	Mycobacterium sp. GA-1285	1	68	1	9	35	56	1	30	5	138	46	42	104	155	49	27	89
Bacteria	Actinobacteria	Actinomycetia	Corynebacteriales	Mycobacteriaceae	Mycobacterium	Mycobacterium sp. GA-1841	3	58	1	90	18	31	3	39	32	131	5	1	98	38	58	29	42
Bacteria	Actinobacteria	Actinomycetia	Corynebacteriales	Mycobacteriaceae	Mycobacterium	Mycobacterium sp. GA-2829	33	114	2	2	23	0	9	51	27	104	46	0	99	160	22	62	188
Bacteria	Actinobacteria	Actinomycetia	Corynebacteriales	Mycobacteriaceae	Mycobacterium	Mycobacterium sp. IS-1264	1	5	0	32	28	10	0	0	0	10	0	0	32	1	51	16	1
Bacteria	Actinobacteria	Actinomycetia	Corynebacteriales	Mycobacteriaceae	Mycobacterium	Mycobacterium sp. IS-1496	24	67	2	17	28	15	1	43	0	150	27	0	107	176	87	8	119
Bacteria	Actinobacteria	Actinomycetia	Corynebacteriales	Mycobacteriaceae	Mycobacterium	Mycobacterium sp. IS-1590	0	15	1	20	1	0	8	0	1	13	3	0	15	26	0	4	25
Bacteria	Actinobacteria	Actinomycetia	Corynebacteriales	Mycobacteriaceae	Mycobacterium	Mycobacterium sp. IS-1742	31	46	1	1	165	89	38	1	37	81	9	3	50	162	4	47	70
Bacteria	Actinobacteria	Actinomycetia	Corynebacteriales	Mycobacteriaceae	Mycobacterium	Mycobacterium sp. IS-3022	14	24	0	27	41	13	12	1	0	74	0	0	43	75	82	24	4
Bacteria	Actinobacteria	Actinomycetia	Corynebacteriales	Mycobacteriaceae	Mycobacterium	Mycobacterium sp. ITM-2016-00316	71	361	1	191	148	248	27	122	168	410	85	101	465	217	95	133	170
Bacteria	Actinobacteria	Actinomycetia	Corynebacteriales	Mycobacteriaceae	Mycobacterium	Mycobacterium sp. ITM-2016-00317	55	124	1	27	98	112	20	10	15	319	21	19	301	69	238	56	74
Bacteria	Actinobacteria	Actinomycetia	Corynebacteriales	Mycobacteriaceae	Mycobacterium	Mycobacterium sp. ITM-2016-00318	28	117	7	176	40	176	101	43	21	256	45	49	194	243	385	69	85
Bacteria	Actinobacteria	Actinomycetia	Corynebacteriales	Mycobacteriaceae	Mycobacterium	Mycobacterium sp. ITM-2017-0098	101	747	3	292	59	414	65	173	82	2076	149	150	1073	272	260	342	213
Bacteria	Actinobacteria	Actinomycetia	Corynebacteriales	Mycobacteriaceae	Mycobacterium	Mycobacterium sp. JS623	11	203	5	91	210	168	7	25	83	332	61	82	336	354	285	54	45
Bacteria	Actinobacteria	Actinomycetia	Corynebacteriales	Mycobacteriaceae	Mycobacterium	Mycobacterium sp. KBS0706	127	149	10	272	157	318	32	41	14	188	110	212	465	532	437	89	394
Bacteria	Actinobacteria	Actinomycetia	Corynebacteriales	Mycobacteriaceae	Mycobacterium	Mycobacterium sp. LNNU 331112	56	67	0	36	25	37	1	14	24	21	2	36	92	92	27	21	43
Bacteria	Actinobacteria	Actinomycetia	Corynebacteriales	Mycobacteriaceae	Mycobacterium	Mycobacterium sp. M26	48	103	7	24	178	82	3	31	39	152	27	128	309	76	200	92	147
Bacteria	Actinobacteria	Actinomycetia	Corynebacteriales	Mycobacteriaceae	Mycobacterium	Mycobacterium sp. MAC_080597_8934	11	22	0	27	21	13	3	1	0	34	2	14	43	0	35	36	15
Bacteria	Actinobacteria	Actinomycetia	Corynebacteriales	Mycobacteriaceae	Mycobacterium	Mycobacterium sp. Marseille-P9652	26	48	3	37	128	14	8	5	0	93	70	52	144	188	106	53	74
Bacteria	Actinobacteria	Actinomycetia	Corynebacteriales	Mycobacteriaceae	Mycobacterium	Mycobacterium sp. MCS	0	19	0	0	0	0	0	0	0	0	0	0	5	4	0	17	0
Bacteria	Actinobacteria	Actinomycetia	Corynebacteriales	Mycobacteriaceae	Mycobacterium	Mycobacterium sp. MFM001	52	42	4	2	137	799	4	1	1	73	0	24	65	283	68	14	10
Bacteria	Actinobacteria	Actinomycetia	Corynebacteriales	Mycobacteriaceae	Mycobacterium	Mycobacterium sp. MS1601	32	292	4	175	99	132	37	65	77	320	122	109	391	143	272	105	166
Bacteria	Actinobacteria	Actinomycetia	Corynebacteriales	Mycobacteriaceae	Mycobacterium	Mycobacterium sp. NAZ190054	27	241	1	65	55	60	38	32	41	428	51	62	304	186	192	25	166
Bacteria	Actinobacteria	Actinomycetia	Corynebacteriales	Mycobacteriaceae	Mycobacterium	Mycobacterium sp. NS-7484	0	8	2	4	11	14	0	0	0	24	16	0	9	34	19	2	0
Bacteria	Actinobacteria	Actinomycetia	Corynebacteriales	Mycobacteriaceae	Mycobacterium	Mycobacterium sp. OAE906	77	123	3	191	16	91	16	4	125	174	41	71	389	231	230	76	74
Bacteria	Actinobacteria	Actinomycetia	Corynebacteriales	Mycobacteriaceae	Mycobacterium	Mycobacterium sp. OAS707	32	107	3	117	15	138	50	41	34	97	47	24	94	185	280	75	19
Bacteria	Actinobacteria	Actinomycetia	Corynebacteriales	Mycobacteriaceae	Mycobacterium	Mycobacterium sp. P7213	14	18	0	0	1	16	2	0	0	48	13	0	30	0	0	10	0
Bacteria	Actinobacteria	Actinomycetia	Corynebacteriales	Mycobacteriaceae	Mycobacterium	Mycobacterium sp. PS03_16	63	107	4	37	109	93	42	40	14	227	35	117	235	240	225	63	180
Bacteria	Actinobacteria	Actinomycetia	Corynebacteriales	Mycobacteriaceae	Mycobacterium	Mycobacterium sp. PYR10	0	39	0	0	45	46	10	2	0	43	27	0	46	0	20	1	17
Bacteria	Actinobacteria	Actinomycetia	Corynebacteriales	Mycobacteriaceae	Mycobacterium	Mycobacterium sp. QGD 101	26	154	7	198	98	120	52	22	71	175	41	83	247	294	403	109	242
Bacteria	Actinobacteria	Actinomycetia	Corynebacteriales	Mycobacteriaceae	Mycobacterium	Mycobacterium sp. Root135	12	127	6	0	12	37	34	7	1	131	69	1	160	53	126	41	1
Bacteria	Actinobacteria	Actinomycetia	Corynebacteriales	Mycobacteriaceae	Mycobacterium	Mycobacterium sp. Root265	70	281	2	188	8	121	41	11	114	394	132	171	408	366	127	107	205
Bacteria	Actinobacteria	Actinomycetia	Corynebacteriales	Mycobacteriaceae	Mycobacterium	Mycobacterium sp. shizuoka-1	172	1546	5	257	292	357	127	165	250	952	157	438	2787	368	751	306	497
Bacteria	Actinobacteria	Actinomycetia	Corynebacteriales	Mycobacteriaceae	Mycobacterium	Mycobacterium sp. Soil538	7	51	2	1	12	49	14	63	0	22	33	32	183	193	0	8	2
Bacteria	Actinobacteria	Actinomycetia	Corynebacteriales	Mycobacteriaceae	Mycobacterium	Mycobacterium sp. SP-6446	0	10	0	2	40	28	0	0	0	19	0	0	14	25	37	3	0
Bacteria	Actinobacteria	Actinomycetia	Corynebacteriales	Mycobacteriaceae	Mycobacterium	Mycobacterium sp. ST-F2	78	123	2	41	2	51	37	22	17	94	21	1	208	137	123	38	52
Bacteria	Actinobacteria	Actinomycetia	Corynebacteriales	Mycobacteriaceae	Mycobacterium	Mycobacterium sp. SWH-M1	47	289	0	61	29	65	2	50	1	621	69	130	475	1	60	10	109
Bacteria	Actinobacteria	Actinomycetia	Corynebacteriales	Mycobacteriaceae	Mycobacterium	Mycobacterium sp. SWH-M3	559	1814	3	768	376	843	307	432	424	2249	537	580	6084	552	687	1515	1688
Bacteria	Actinobacteria	Actinomycetia	Corynebacteriales	Mycobacteriaceae	Mycobacterium	Mycobacterium sp. SWH-M5	0	24	0	26	37	1	2	8	0	33	0	19	109	34	18	18	42
Bacteria	Actinobacteria	Actinomycetia	Corynebacteriales	Mycobacteriaceae	Mycobacterium	Mycobacterium sp. THAF192	154	2179	0	355	221	475	90	111	133	2923	255	194	2177	164	319	311	504
Bacteria	Actinobacteria	Actinomycetia	Corynebacteriales	Mycobacteriaceae	Mycobacterium	Mycobacterium sp. UM_Kg1	24	22	0	5	10	14	4	9	0	53	18	1	141	24	19	42	17
Bacteria	Actinobacteria	Actinomycetia	Corynebacteriales	Mycobacteriaceae	Mycobacterium	Mycobacterium sp. UM_Kg27	0	10	0	0	1	0	0	4	0	10	0	0	29	1	4	15	1
Bacteria	Actinobacteria	Actinomycetia	Corynebacteriales	Mycobacteriaceae	Mycobacterium	Mycobacterium sp. UM_NYF	0	9	0	0	0	0	0	0	0	0	0	0	0	56	0	1	0
Bacteria	Actinobacteria	Actinomycetia	Corynebacteriales	Mycobacteriaceae	Mycobacterium	Mycobacterium sp. UM_RHS	29	32	0	29	48	0	0	25	1	33	15	1	91	0	1	4	43
Bacteria	Actinobacteria	Actinomycetia	Corynebacteriales	Mycobacteriaceae	Mycobacterium	Mycobacterium sp. UM_WGJ	11	26	0	29	0	0	0	20	20	57	0	52	24	0	0	25	3
Bacteria	Actinobacteria	Actinomycetia	Corynebacteriales	Mycobacteriaceae	Mycobacterium	Mycobacterium sp. UNC280MFTsu5.1	24	67	4	0	33	28	26	40	0	59	0	13	115	0	20	35	18
Bacteria	Actinobacteria	Actinomycetia	Corynebacteriales	Mycobacteriaceae	Mycobacterium	Mycobacterium sp. URHB0044	73	247	15	52	128	212	59	30	130	224	94	139	631	375	460	81	154
Bacteria	Actinobacteria	Actinomycetia	Corynebacteriales	Mycobacteriaceae	Mycobacterium	Mycobacterium sp. URHD0025	14	32	0	93	0	18	8	0	10	106	37	13	50	44	4	18	2
Bacteria	Actinobacteria	Actinomycetia	Corynebacteriales	Mycobacteriaceae	Mycobacterium	Mycobacterium sp. WY10	0	26	0	0	1	5	6	0	0	40	0	0	23	22	0	13	0
Bacteria	Actinobacteria	Actinomycetia	Corynebacteriales	Mycobacteriaceae	Mycobacterium	Mycobacterium sp. YC-RL4	143	378	2	195	172	116	42	68	49	537	37	63	437	120	119	123	95
Bacteria	Actinobacteria	Actinomycetia	Corynebacteriales	Mycobacteriaceae	Mycobacterium	Mycobacterium sp. YR708	0	12	0	0	0	0	15	0	0	7	0	12	15	0	0	25	69
Bacteria	Actinobacteria	Actinomycetia	Corynebacteriales	Mycobacteriaceae	Mycobacterium	Mycobacterium sp. YR782	0	12	2	66	0	0	3	0	0	43	0	0	55	84	47	14	40
Bacteria	Actinobacteria	Actinomycetia	Corynebacteriales	Mycobacteriaceae	Mycobacterium	Mycobacterium sp.	654	825	346	691	4494	809	944	947	280	1227	337	1476	2092	2007	1312	403	1168
Bacteria	Actinobacteria	Actinomycetia	Corynebacteriales	Mycobacteriaceae	Mycobacterium	Mycobacterium stomatepiae	24	42	2	27	7	101	10	26	65	108	10	16	101	31	44	42	18
Bacteria	Actinobacteria	Actinomycetia	Corynebacteriales	Mycobacteriaceae	Mycobacterium	Mycobacterium syngnathidarum	7	178	0	58	48	0	2	2	0	418	34	47	261	35	96	41	24
Bacteria	Actinobacteria	Actinomycetia	Corynebacteriales	Mycobacteriaceae	Mycobacterium	Mycobacterium szulgai	0	15	1	12	45	70	11	18	0	89	46	95	192	12	68	13	91
Bacteria	Actinobacteria	Actinomycetia	Corynebacteriales	Mycobacteriaceae	Mycobacterium	Mycobacterium talmoniae	0	56	3	16	9	55	15	0	2	85	19	0	73	179	84	46	72
Bacteria	Actinobacteria	Actinomycetia	Corynebacteriales	Mycobacteriaceae	Mycobacterium	Mycobacterium terramassiliense	0	4	0	16	47	30	10	1	0	62	1	29	138	44	42	25	110
Bacteria	Actinobacteria	Actinomycetia	Corynebacteriales	Mycobacteriaceae	Mycobacterium	Mycobacterium timonense	21	98	1	133	18	106	15	57	28	239	49	94	212	28	18	61	37
Bacteria	Actinobacteria	Actinomycetia	Corynebacteriales	Mycobacteriaceae	Mycobacterium	Mycobacterium triplex	36	37	0	57	100	14	13	31	10	40	16	11	113	44	4	54	117
Bacteria	Actinobacteria	Actinomycetia	Corynebacteriales	Mycobacteriaceae	Mycobacterium	Mycobacterium tuberculosis	308696	669224	1776	463090	233212	519896	216321	257002	377176	1122861	293467	380513	922998	430007	647756	691520	743541
Bacteria	Actinobacteria	Actinomycetia	Corynebacteriales	Mycobacteriaceae	Mycobacterium	Mycobacterium ulcerans	57	135	3	17	83	120	10	52	26	330	130	106	188	132	168	114	115
Bacteria	Actinobacteria	Actinomycetia	Corynebacteriales	Mycobacteriaceae	Mycobacterium	Mycobacterium vulneris	12	2	0	23	84	56	3	37	0	68	3	2	218	203	20	14	23
Bacteria	Actinobacteria	Actinomycetia	Corynebacteriales	Mycobacteriaceae	Mycobacterium	Mycobacterium xenopi	187	559	18	465	581	625	166	271	410	870	287	147	1181	1528	930	477	638
Bacteria	Actinobacteria	Actinomycetia	Corynebacteriales	Mycobacteriaceae	Mycobacterium	uncultured Mycobacterium sp.	45	156	6	154	86	149	17	15	65	296	34	0	243	118	164	64	153
Bacteria	Actinobacteria	Actinomycetia	Corynebacteriales	Nocardiaceae	Rhodococcus	Rhodococcus aetherivorans	35	41	0	5	45	123	32	28	39	58	20	24	92	75	78	18	70
Bacteria	Actinobacteria	Actinomycetia	Corynebacteriales	Nocardiaceae	Rhodococcus	Rhodococcus agglutinans	18	33	0	52	17	94	10	3	0	67	6	29	48	106	42	24	95
Bacteria	Actinobacteria	Actinomycetia	Corynebacteriales	Nocardiaceae	Rhodococcus	Rhodococcus coprophilus	6	47	8	74	11	68	3	1	0	26	2	1	86	115	115	34	50
Bacteria	Actinobacteria	Actinomycetia	Corynebacteriales	Nocardiaceae	Rhodococcus	Rhodococcus corynebacterioides	10	69	1	14	3	120	38	24	45	55	1	1	80	50	37	14	56
Bacteria	Actinobacteria	Actinomycetia	Corynebacteriales	Nocardiaceae	Rhodococcus	Rhodococcus defluvii	36	67	12	20	52	0	6	4	24	132	25	23	74	149	38	20	43
Bacteria	Actinobacteria	Actinomycetia	Corynebacteriales	Nocardiaceae	Rhodococcus	Rhodococcus enclensis	0	0	0	2	0	1	0	8	0	0	0	0	33	41	46	1	72
Bacteria	Actinobacteria	Actinomycetia	Corynebacteriales	Nocardiaceae	Rhodococcus	Rhodococcus erythropolis	19	183	8	185	109	94	65	68	141	289	114	55	587	357	257	83	310
Bacteria	Actinobacteria	Actinomycetia	Corynebacteriales	Nocardiaceae	Rhodococcus	Rhodococcus fascians	83	168	2	86	102	242	49	36	74	230	82	69	515	576	154	134	183
Bacteria	Actinobacteria	Actinomycetia	Corynebacteriales	Nocardiaceae	Rhodococcus	Rhodococcus hoagii	27	139	2	137	21	133	28	42	145	239	28	84	244	92	157	167	45
Bacteria	Actinobacteria	Actinomycetia	Corynebacteriales	Nocardiaceae	Rhodococcus	Rhodococcus imtechensis	12	12	1	58	25	0	4	0	73	40	0	32	29	12	24	19	65
Bacteria	Actinobacteria	Actinomycetia	Corynebacteriales	Nocardiaceae	Rhodococcus	Rhodococcus jostii	17	30	0	6	25	52	26	24	20	112	13	29	105	339	97	72	75
Bacteria	Actinobacteria	Actinomycetia	Corynebacteriales	Nocardiaceae	Rhodococcus	Rhodococcus koreensis	2	20	1	6	40	36	0	14	1	24	0	22	89	24	59	26	154
Bacteria	Actinobacteria	Actinomycetia	Corynebacteriales	Nocardiaceae	Rhodococcus	Rhodococcus kroppenstedtii	7	28	0	3	0	0	1	1	14	46	0	0	23	2	32	8	50
Bacteria	Actinobacteria	Actinomycetia	Corynebacteriales	Nocardiaceae	Rhodococcus	Rhodococcus kyotonensis	33	107	2	3	41	234	19	47	29	217	41	30	237	184	64	88	58
Bacteria	Actinobacteria	Actinomycetia	Corynebacteriales	Nocardiaceae	Rhodococcus	Rhodococcus maanshanensis	15	9	1	10	41	36	0	0	44	20	0	18	18	20	34	9	21
Bacteria	Actinobacteria	Actinomycetia	Corynebacteriales	Nocardiaceae	Rhodococcus	Rhodococcus marinonascens	5	8	0	38	13	118	22	24	15	67	0	14	156	72	165	28	16
Bacteria	Actinobacteria	Actinomycetia	Corynebacteriales	Nocardiaceae	Rhodococcus	Rhodococcus opacus	68	177	8	108	63	321	43	133	7	271	85	106	469	449	414	96	339
Bacteria	Actinobacteria	Actinomycetia	Corynebacteriales	Nocardiaceae	Rhodococcus	Rhodococcus oryzae	42	7	2	2	2	34	2	1	0	73	14	1	35	69	0	1	0
Bacteria	Actinobacteria	Actinomycetia	Corynebacteriales	Nocardiaceae	Rhodococcus	Rhodococcus percolatus	0	0	0	0	0	0	0	0	0	0	0	0	0	0	0	1	0
Bacteria	Actinobacteria	Actinomycetia	Corynebacteriales	Nocardiaceae	Rhodococcus	Rhodococcus phenolicus	11	33	1	52	5	73	34	14	6	50	0	2	193	238	109	38	68
Bacteria	Actinobacteria	Actinomycetia	Corynebacteriales	Nocardiaceae	Rhodococcus	Rhodococcus pyridinivorans	25	102	1	57	83	85	44	36	35	166	29	78	154	141	26	104	112
Bacteria	Actinobacteria	Actinomycetia	Corynebacteriales	Nocardiaceae	Rhodococcus	Rhodococcus qingshengii	111	30	0	37	23	112	29	16	33	75	48	68	280	471	73	26	4
Bacteria	Actinobacteria	Actinomycetia	Corynebacteriales	Nocardiaceae	Rhodococcus	Rhodococcus rhodnii	14	28	2	2	47	61	15	0	22	75	13	23	254	266	7	36	103
Bacteria	Actinobacteria	Actinomycetia	Corynebacteriales	Nocardiaceae	Rhodococcus	Rhodococcus rhodochrous	87	314	7	386	80	583	32	66	88	420	96	170	481	444	215	82	177
Bacteria	Actinobacteria	Actinomycetia	Corynebacteriales	Nocardiaceae	Rhodococcus	Rhodococcus ruber	25	285	7	89	159	178	29	85	228	332	132	50	500	327	263	117	199
Bacteria	Actinobacteria	Actinomycetia	Corynebacteriales	Nocardiaceae	Rhodococcus	Rhodococcus sp. 06-1477-1B	15	12	0	2	1	37	7	15	22	52	9	0	89	72	16	61	125
Bacteria	Actinobacteria	Actinomycetia	Corynebacteriales	Nocardiaceae	Rhodococcus	Rhodococcus sp. 06-221-2	0	1	1	0	0	0	0	0	0	8	0	0	0	0	37	1	0
Bacteria	Actinobacteria	Actinomycetia	Corynebacteriales	Nocardiaceae	Rhodococcus	Rhodococcus sp. 06-235-1A	5	8	4	0	6	16	2	0	0	2	2	0	16	4	22	1	0
Bacteria	Actinobacteria	Actinomycetia	Corynebacteriales	Nocardiaceae	Rhodococcus	Rhodococcus sp. 06-418-1B	0	11	0	0	20	10	0	0	16	15	0	0	56	0	0	25	1
Bacteria	Actinobacteria	Actinomycetia	Corynebacteriales	Nocardiaceae	Rhodococcus	Rhodococcus sp. 105337	0	12	0	0	0	23	3	1	1	0	2	18	26	33	0	1	2
Bacteria	Actinobacteria	Actinomycetia	Corynebacteriales	Nocardiaceae	Rhodococcus	Rhodococcus sp. 1139	0	0	0	3	0	0	7	0	14	0	0	0	0	10	0	15	0
Bacteria	Actinobacteria	Actinomycetia	Corynebacteriales	Nocardiaceae	Rhodococcus	Rhodococcus sp. 1163	1	0	0	0	24	1	11	0	0	0	0	0	9	1	0	1	1
Bacteria	Actinobacteria	Actinomycetia	Corynebacteriales	Nocardiaceae	Rhodococcus	Rhodococcus sp. 1168	39	29	5	55	12	55	15	0	59	14	9	1	67	90	1	9	109
Bacteria	Actinobacteria	Actinomycetia	Corynebacteriales	Nocardiaceae	Rhodococcus	Rhodococcus sp. 14-2470-1a	40	4	0	0	0	0	0	0	0	0	0	0	8	35	0	22	3
Bacteria	Actinobacteria	Actinomycetia	Corynebacteriales	Nocardiaceae	Rhodococcus	Rhodococcus sp. 14C212	0	13	6	0	7	66	22	12	0	39	27	1	46	37	26	1	14
Bacteria	Actinobacteria	Actinomycetia	Corynebacteriales	Nocardiaceae	Rhodococcus	Rhodococcus sp. 15-649-2-2	0	0	0	0	0	8	0	0	1	9	0	0	19	23	53	19	10
Bacteria	Actinobacteria	Actinomycetia	Corynebacteriales	Nocardiaceae	Rhodococcus	Rhodococcus sp. 1R11	0	16	0	0	0	0	8	0	0	18	0	0	3	1	22	3	1
Bacteria	Actinobacteria	Actinomycetia	Corynebacteriales	Nocardiaceae	Rhodococcus	Rhodococcus sp. 29MFTsu3.1	1	0	0	0	0	3	17	9	0	4	3	0	24	69	1	13	0
Bacteria	Actinobacteria	Actinomycetia	Corynebacteriales	Nocardiaceae	Rhodococcus	Rhodococcus sp. A14	13	3	2	1	0	1	0	1	31	7	0	0	26	5	0	8	0
Bacteria	Actinobacteria	Actinomycetia	Corynebacteriales	Nocardiaceae	Rhodococcus	Rhodococcus sp. ABRD24	30	40	2	37	30	66	57	23	57	108	33	6	141	111	6	54	79
Bacteria	Actinobacteria	Actinomycetia	Corynebacteriales	Nocardiaceae	Rhodococcus	Rhodococcus sp. ACPA1	0	4	0	0	0	0	0	1	0	1	1	1	16	2	0	5	0
Bacteria	Actinobacteria	Actinomycetia	Corynebacteriales	Nocardiaceae	Rhodococcus	Rhodococcus sp. ACS1	0	6	0	1	25	19	3	0	25	21	19	0	33	42	97	8	98
Bacteria	Actinobacteria	Actinomycetia	Corynebacteriales	Nocardiaceae	Rhodococcus	Rhodococcus sp. AD45	0	0	0	0	0	0	0	0	0	7	0	0	0	18	1	6	7
Bacteria	Actinobacteria	Actinomycetia	Corynebacteriales	Nocardiaceae	Rhodococcus	Rhodococcus sp. ADH	0	0	0	0	1	0	0	19	0	0	0	0	0	29	0	1	0
Bacteria	Actinobacteria	Actinomycetia	Corynebacteriales	Nocardiaceae	Rhodococcus	Rhodococcus sp. AG1013	12	15	1	10	2	3	25	7	14	15	0	1	23	5	1	8	20
Bacteria	Actinobacteria	Actinomycetia	Corynebacteriales	Nocardiaceae	Rhodococcus	Rhodococcus sp. ANT_H53B	5	0	0	0	0	0	0	0	0	0	10	0	0	1	2	8	38
Bacteria	Actinobacteria	Actinomycetia	Corynebacteriales	Nocardiaceae	Rhodococcus	Rhodococcus sp. AW25M09	0	24	5	0	8	43	40	0	40	48	2	18	113	35	1	32	44
Bacteria	Actinobacteria	Actinomycetia	Corynebacteriales	Nocardiaceae	Rhodococcus	Rhodococcus sp. B10	0	38	0	0	0	22	0	0	7	32	0	0	6	57	1	3	39
Bacteria	Actinobacteria	Actinomycetia	Corynebacteriales	Nocardiaceae	Rhodococcus	Rhodococcus sp. BP22	0	2	1	8	0	1	12	0	0	9	15	0	32	4	34	13	48
Bacteria	Actinobacteria	Actinomycetia	Corynebacteriales	Nocardiaceae	Rhodococcus	Rhodococcus sp. C1-24	2	167	2	41	35	149	14	77	75	185	47	50	110	181	66	122	199
Bacteria	Actinobacteria	Actinomycetia	Corynebacteriales	Nocardiaceae	Rhodococcus	Rhodococcus sp. C9-5	44	62	1	25	50	48	25	6	13	117	36	0	83	185	146	55	64
Bacteria	Actinobacteria	Actinomycetia	Corynebacteriales	Nocardiaceae	Rhodococcus	Rhodococcus sp. Chr-9	5	19	0	16	0	1	8	0	14	16	4	0	28	25	0	3	1
Bacteria	Actinobacteria	Actinomycetia	Corynebacteriales	Nocardiaceae	Rhodococcus	Rhodococcus sp. CUA-806	8	54	0	48	14	56	6	9	0	39	0	1	45	75	46	31	85
Bacteria	Actinobacteria	Actinomycetia	Corynebacteriales	Nocardiaceae	Rhodococcus	Rhodococcus sp. CX	0	82	6	105	0	17	23	14	55	47	12	18	85	158	1	15	24
Bacteria	Actinobacteria	Actinomycetia	Corynebacteriales	Nocardiaceae	Rhodococcus	Rhodococcus sp. DMU1	0	0	0	0	0	0	2	0	0	10	0	0	18	5	37	8	1
Bacteria	Actinobacteria	Actinomycetia	Corynebacteriales	Nocardiaceae	Rhodococcus	Rhodococcus sp. EPR-157	22	41	2	30	28	11	26	27	68	83	58	36	109	165	37	33	94
Bacteria	Actinobacteria	Actinomycetia	Corynebacteriales	Nocardiaceae	Rhodococcus	Rhodococcus sp. Eu-32	11	4	1	5	16	20	0	0	0	47	25	0	34	4	23	8	0
Bacteria	Actinobacteria	Actinomycetia	Corynebacteriales	Nocardiaceae	Rhodococcus	Rhodococcus sp. HNM0563	9	31	11	11	66	66	24	93	5	42	19	1	153	61	132	13	177
Bacteria	Actinobacteria	Actinomycetia	Corynebacteriales	Nocardiaceae	Rhodococcus	Rhodococcus sp. HNM0569	80	52	10	0	126	168	48	147	24	78	15	123	194	164	26	31	189
Bacteria	Actinobacteria	Actinomycetia	Corynebacteriales	Nocardiaceae	Rhodococcus	Rhodococcus sp. IC4_135	16	1	0	22	0	27	1	0	14	7	0	0	7	1	76	10	0
Bacteria	Actinobacteria	Actinomycetia	Corynebacteriales	Nocardiaceae	Rhodococcus	Rhodococcus sp. IITR03	0	1	0	0	70	25	0	8	11	25	0	0	7	0	47	1	0
Bacteria	Actinobacteria	Actinomycetia	Corynebacteriales	Nocardiaceae	Rhodococcus	Rhodococcus sp. JVH1	0	43	3	0	14	13	28	17	4	13	0	101	100	154	13	5	55
Bacteria	Actinobacteria	Actinomycetia	Corynebacteriales	Nocardiaceae	Rhodococcus	Rhodococcus sp. KB6	0	0	1	0	0	0	0	0	17	28	0	27	8	12	0	12	0
Bacteria	Actinobacteria	Actinomycetia	Corynebacteriales	Nocardiaceae	Rhodococcus	Rhodococcus sp. KBS0724	0	24	0	13	50	12	12	18	0	72	12	2	1	35	27	11	5
Bacteria	Actinobacteria	Actinomycetia	Corynebacteriales	Nocardiaceae	Rhodococcus	Rhodococcus sp. LB1	0	16	0	29	0	3	1	5	31	0	6	33	38	117	21	2	0
Bacteria	Actinobacteria	Actinomycetia	Corynebacteriales	Nocardiaceae	Rhodococcus	Rhodococcus sp. Leaf233	0	5	0	0	18	0	0	6	0	35	24	0	8	0	0	3	0
Bacteria	Actinobacteria	Actinomycetia	Corynebacteriales	Nocardiaceae	Rhodococcus	Rhodococcus sp. Leaf278	1	1	0	18	1	46	0	0	7	6	0	0	44	54	30	2	1
Bacteria	Actinobacteria	Actinomycetia	Corynebacteriales	Nocardiaceae	Rhodococcus	Rhodococcus sp. LHW50502	15	32	3	59	3	18	0	7	35	11	7	2	125	18	39	39	61
Bacteria	Actinobacteria	Actinomycetia	Corynebacteriales	Nocardiaceae	Rhodococcus	Rhodococcus sp. LHW51113	51	53	1	27	1	19	0	7	4	49	3	0	87	234	16	33	25
Bacteria	Actinobacteria	Actinomycetia	Corynebacteriales	Nocardiaceae	Rhodococcus	Rhodococcus sp. M8	106	171	1	188	105	164	56	91	71	314	217	191	349	145	173	185	210
Bacteria	Actinobacteria	Actinomycetia	Corynebacteriales	Nocardiaceae	Rhodococcus	Rhodococcus sp. MEB064	4	62	0	72	6	23	0	3	13	46	0	0	59	30	33	8	66
Bacteria	Actinobacteria	Actinomycetia	Corynebacteriales	Nocardiaceae	Rhodococcus	Rhodococcus sp. MS16	0	5	0	2	0	32	9	0	0	0	0	0	13	23	1	1	3
Bacteria	Actinobacteria	Actinomycetia	Corynebacteriales	Nocardiaceae	Rhodococcus	Rhodococcus sp. MTM3W5.2	9	40	2	12	14	117	5	27	45	47	31	2	38	56	48	8	117
Bacteria	Actinobacteria	Actinomycetia	Corynebacteriales	Nocardiaceae	Rhodococcus	Rhodococcus sp. NCIMB 12038	4	78	0	8	8	30	10	0	45	24	25	1	44	70	14	5	0
Bacteria	Actinobacteria	Actinomycetia	Corynebacteriales	Nocardiaceae	Rhodococcus	Rhodococcus sp. NS1	0	20	0	0	0	7	0	4	0	0	4	1	21	0	51	6	0
Bacteria	Actinobacteria	Actinomycetia	Corynebacteriales	Nocardiaceae	Rhodococcus	Rhodococcus sp. OAS809	1	34	0	0	0	13	4	0	18	43	0	0	79	0	0	4	2
Bacteria	Actinobacteria	Actinomycetia	Corynebacteriales	Nocardiaceae	Rhodococcus	Rhodococcus sp. OK269	70	25	3	16	101	47	24	20	27	141	0	20	130	119	93	28	57
Bacteria	Actinobacteria	Actinomycetia	Corynebacteriales	Nocardiaceae	Rhodococcus	Rhodococcus sp. OK302	40	5	0	21	0	2	0	3	0	44	0	0	54	205	2	7	0
Bacteria	Actinobacteria	Actinomycetia	Corynebacteriales	Nocardiaceae	Rhodococcus	Rhodococcus sp. OK519	20	54	0	4	2	1	1	12	2	42	5	36	42	132	43	19	65
Bacteria	Actinobacteria	Actinomycetia	Corynebacteriales	Nocardiaceae	Rhodococcus	Rhodococcus sp. P14	17	6	0	0	40	0	0	0	0	0	0	0	29	21	0	9	0
Bacteria	Actinobacteria	Actinomycetia	Corynebacteriales	Nocardiaceae	Rhodococcus	Rhodococcus sp. P1Y	36	61	1	20	74	184	2	0	50	52	7	38	156	90	6	15	94
Bacteria	Actinobacteria	Actinomycetia	Corynebacteriales	Nocardiaceae	Rhodococcus	Rhodococcus sp. P27	5	11	0	0	0	0	0	0	0	0	0	74	5	0	0	1	0
Bacteria	Actinobacteria	Actinomycetia	Corynebacteriales	Nocardiaceae	Rhodococcus	Rhodococcus sp. PBTS 1	13	16	1	0	26	9	0	5	0	21	0	22	35	9	0	46	52
Bacteria	Actinobacteria	Actinomycetia	Corynebacteriales	Nocardiaceae	Rhodococcus	Rhodococcus sp. PML026	28	1	0	53	27	19	13	0	0	99	3	0	41	48	28	16	82
Bacteria	Actinobacteria	Actinomycetia	Corynebacteriales	Nocardiaceae	Rhodococcus	Rhodococcus sp. Q	0	20	0	45	0	0	0	24	1	22	0	1	37	37	1	39	24
Bacteria	Actinobacteria	Actinomycetia	Corynebacteriales	Nocardiaceae	Rhodococcus	Rhodococcus sp. Q1	0	0	0	0	20	0	0	1	13	0	0	38	1	3	0	1	0
Bacteria	Actinobacteria	Actinomycetia	Corynebacteriales	Nocardiaceae	Rhodococcus	Rhodococcus sp. R04	0	0	0	0	0	0	0	0	0	0	0	0	0	0	0	1	0
Bacteria	Actinobacteria	Actinomycetia	Corynebacteriales	Nocardiaceae	Rhodococcus	Rhodococcus sp. R1101	0	0	0	0	0	2	0	0	0	1	0	0	0	0	0	1	0
Bacteria	Actinobacteria	Actinomycetia	Corynebacteriales	Nocardiaceae	Rhodococcus	Rhodococcus sp. RD6.2	517	1204	7	749	425	788	236	394	674	1611	466	503	2166	615	1321	741	1438
Bacteria	Actinobacteria	Actinomycetia	Corynebacteriales	Nocardiaceae	Rhodococcus	Rhodococcus sp. S2-17	10	51	0	21	74	46	31	0	40	54	33	46	70	34	59	9	3
Bacteria	Actinobacteria	Actinomycetia	Corynebacteriales	Nocardiaceae	Rhodococcus	Rhodococcus sp. SBT000017	0	1	0	10	62	10	0	0	17	1	0	42	43	0	1	7	64
Bacteria	Actinobacteria	Actinomycetia	Corynebacteriales	Nocardiaceae	Rhodococcus	Rhodococcus sp. SC4	18	5	0	2	19	0	23	36	1	13	8	0	28	62	0	33	36
Bacteria	Actinobacteria	Actinomycetia	Corynebacteriales	Nocardiaceae	Rhodococcus	Rhodococcus sp. SGAir0479	23	116	2	0	15	46	8	28	38	31	107	49	167	56	17	23	95
Bacteria	Actinobacteria	Actinomycetia	Corynebacteriales	Nocardiaceae	Rhodococcus	Rhodococcus sp. SMB37	20	42	1	3	68	23	14	2	13	45	7	70	104	271	24	22	48
Bacteria	Actinobacteria	Actinomycetia	Corynebacteriales	Nocardiaceae	Rhodococcus	Rhodococcus sp. SRB_17	0	0	0	17	0	43	1	10	46	14	20	34	23	65	39	9	14
Bacteria	Actinobacteria	Actinomycetia	Corynebacteriales	Nocardiaceae	Rhodococcus	Rhodococcus sp. T7	0	50	0	23	22	53	13	8	37	90	10	25	108	163	35	55	16
Bacteria	Actinobacteria	Actinomycetia	Corynebacteriales	Nocardiaceae	Rhodococcus	Rhodococcus sp. UFZ-B548	0	4	0	0	15	0	1	0	0	11	8	0	5	3	60	4	0
Bacteria	Actinobacteria	Actinomycetia	Corynebacteriales	Nocardiaceae	Rhodococcus	Rhodococcus sp. UNC23MFCrub1.1	0	27	0	0	26	0	0	0	4	36	0	0	10	35	1	1	51
Bacteria	Actinobacteria	Actinomycetia	Corynebacteriales	Nocardiaceae	Rhodococcus	Rhodococcus sp. UNC363MFTsu5.1	30	5	2	18	13	3	2	0	0	29	16	54	56	40	48	18	0
Bacteria	Actinobacteria	Actinomycetia	Corynebacteriales	Nocardiaceae	Rhodococcus	Rhodococcus sp. W8901	0	18	0	1	0	0	0	27	59	35	31	0	25	0	38	9	27
Bacteria	Actinobacteria	Actinomycetia	Corynebacteriales	Nocardiaceae	Rhodococcus	Rhodococcus sp. WAY2	3	35	1	0	2	64	0	1	1	83	2	0	156	74	8	9	66
Bacteria	Actinobacteria	Actinomycetia	Corynebacteriales	Nocardiaceae	Rhodococcus	Rhodococcus sp. WB1	0	0	0	1	0	0	0	31	0	0	17	0	47	254	0	3	4
Bacteria	Actinobacteria	Actinomycetia	Corynebacteriales	Nocardiaceae	Rhodococcus	Rhodococcus sp. WB9	0	1	0	0	0	11	5	7	16	56	1	1	39	1	36	21	0
Bacteria	Actinobacteria	Actinomycetia	Corynebacteriales	Nocardiaceae	Rhodococcus	Rhodococcus sp. WMMA185	1	20	4	3	14	29	3	25	35	66	7	0	20	61	63	19	1
Bacteria	Actinobacteria	Actinomycetia	Corynebacteriales	Nocardiaceae	Rhodococcus	Rhodococcus sp. WS3	0	2	0	0	0	0	0	0	0	0	0	0	12	3	0	4	0
Bacteria	Actinobacteria	Actinomycetia	Corynebacteriales	Nocardiaceae	Rhodococcus	Rhodococcus sp. WS4	36	53	4	182	13	12	30	15	42	150	2	1	147	131	103	35	40
Bacteria	Actinobacteria	Actinomycetia	Corynebacteriales	Nocardiaceae	Rhodococcus	Rhodococcus sp. X156	72	93	8	80	68	164	29	15	75	175	8	66	585	395	158	28	144
Bacteria	Actinobacteria	Actinomycetia	Corynebacteriales	Nocardiaceae	Rhodococcus	Rhodococcus sp. YH3-3	0	0	0	5	0	10	0	0	0	0	0	0	11	15	21	1	3
Bacteria	Actinobacteria	Actinomycetia	Corynebacteriales	Nocardiaceae	Rhodococcus	Rhodococcus sp.	9	90	16	80	68	140	2	19	87	50	22	2	88	357	50	41	230
Bacteria	Actinobacteria	Actinomycetia	Corynebacteriales	Nocardiaceae	Rhodococcus	Rhodococcus subtropicus	404	156	303	14	103	81	657	684	78	74	41	21	118	85	144	56	77
Bacteria	Actinobacteria	Actinomycetia	Corynebacteriales	Nocardiaceae	Rhodococcus	Rhodococcus triatomae	62	111	2	45	67	142	39	55	53	206	58	118	599	595	298	91	357
Bacteria	Actinobacteria	Actinomycetia	Corynebacteriales	Nocardiaceae	Rhodococcus	Rhodococcus trifolii	18	85	5	101	100	125	24	28	46	123	37	51	107	228	60	51	93
Bacteria	Actinobacteria	Actinomycetia	Corynebacteriales	Nocardiaceae	Rhodococcus	Rhodococcus tukisamuensis	19	106	5	58	52	30	44	20	52	63	35	39	94	117	96	44	148
Bacteria	Actinobacteria	Actinomycetia	Corynebacteriales	Nocardiaceae	Rhodococcus	Rhodococcus wratislaviensis	52	110	3	65	58	88	33	92	42	297	44	34	491	757	250	141	226
Bacteria	Actinobacteria	Actinomycetia	Corynebacteriales	Nocardiaceae	Rhodococcus	Rhodococcus yunnanensis	0	89	1	45	38	141	6	65	0	66	25	34	221	198	90	51	38
Bacteria	Actinobacteria	Actinomycetia	Corynebacteriales	Nocardiaceae	Rhodococcus	Rhodococcus zopfii	19	31	1	15	96	29	19	0	35	78	4	70	283	163	70	29	99
Bacteria	Actinobacteria	Actinomycetia	Corynebacteriales	Tsukamurellaceae	Tsukamurella	Tsukamurella asaccharolytica	1	20	0	80	1	21	4	16	15	82	9	1	25	53	5	25	66
Bacteria	Actinobacteria	Actinomycetia	Corynebacteriales	Tsukamurellaceae	Tsukamurella	Tsukamurella columbiensis	0	0	0	0	0	0	0	0	0	0	0	0	6	0	1	9	0
Bacteria	Actinobacteria	Actinomycetia	Corynebacteriales	Tsukamurellaceae	Tsukamurella	Tsukamurella conjunctivitidis	30	8	0	1	26	22	2	0	0	0	0	0	0	0	1	3	0
Bacteria	Actinobacteria	Actinomycetia	Corynebacteriales	Tsukamurellaceae	Tsukamurella	Tsukamurella paurometabola	31	59	3	4	211	71	42	20	74	76	10	16	306	71	132	60	147
Bacteria	Actinobacteria	Actinomycetia	Corynebacteriales	Tsukamurellaceae	Tsukamurella	Tsukamurella pseudospumae	17	63	1	30	1	10	0	31	3	65	50	30	109	129	51	26	19
Bacteria	Actinobacteria	Actinomycetia	Corynebacteriales	Tsukamurellaceae	Tsukamurella	Tsukamurella pulmonis	1	52	0	1	1	145	6	2	68	83	9	14	66	147	92	14	111
Bacteria	Actinobacteria	Actinomycetia	Corynebacteriales	Tsukamurellaceae	Tsukamurella	Tsukamurella sp. 1534	0	17	0	0	44	17	18	7	18	68	24	4	40	212	39	9	23
Bacteria	Actinobacteria	Actinomycetia	Corynebacteriales	Tsukamurellaceae	Tsukamurella	Tsukamurella spumae	11	34	3	39	1	30	4	0	18	56	0	21	88	37	2	5	90
Bacteria	Actinobacteria	Actinomycetia	Corynebacteriales	Tsukamurellaceae	Tsukamurella	Tsukamurella sputi	13	41	0	0	2	70	1	9	40	32	1	1	20	112	27	17	66
Bacteria	Actinobacteria	Actinomycetia	Corynebacteriales	Tsukamurellaceae	Tsukamurella	Tsukamurella tyrosinosolvens	42	42	1	32	104	83	0	66	1	149	73	0	198	330	182	81	114
Bacteria	Actinobacteria	Actinomycetia	Geodermatophilales	Geodermatophilaceae	Blastococcus	Blastococcus aggregatus	11	170	5	269	100	209	11	34	55	103	115	84	352	197	211	70	522
Bacteria	Actinobacteria	Actinomycetia	Geodermatophilales	Geodermatophilaceae	Blastococcus	Blastococcus atacamensis	33	86	0	26	52	89	16	25	8	76	14	51	174	112	107	31	124
Bacteria	Actinobacteria	Actinomycetia	Geodermatophilales	Geodermatophilaceae	Blastococcus	Blastococcus colisei	1	121	8	45	126	99	34	33	57	274	17	120	341	429	331	81	131
Bacteria	Actinobacteria	Actinomycetia	Geodermatophilales	Geodermatophilaceae	Blastococcus	Blastococcus endophyticus	41	119	4	112	170	152	44	21	126	232	57	38	342	468	153	69	194
Bacteria	Actinobacteria	Actinomycetia	Geodermatophilales	Geodermatophilaceae	Blastococcus	Blastococcus litoris	51	106	0	368	87	139	27	29	60	174	61	40	126	241	255	57	209
Bacteria	Actinobacteria	Actinomycetia	Geodermatophilales	Geodermatophilaceae	Blastococcus	Blastococcus saxobsidens	204	479	17	354	445	286	80	154	388	518	194	257	771	824	611	176	697
Bacteria	Actinobacteria	Actinomycetia	Geodermatophilales	Geodermatophilaceae	Blastococcus	Blastococcus sp. AZ43	74	164	1	84	116	86	42	37	66	147	31	49	354	295	179	55	197
Bacteria	Actinobacteria	Actinomycetia	Geodermatophilales	Geodermatophilaceae	Blastococcus	Blastococcus sp. CCUG 61487	97	129	2	120	14	133	18	43	49	172	113	55	343	319	230	31	314
Bacteria	Actinobacteria	Actinomycetia	Geodermatophilales	Geodermatophilaceae	Blastococcus	Blastococcus sp. CT_GayMR16	114	131	7	141	104	248	52	26	43	361	43	94	354	559	180	64	477
Bacteria	Actinobacteria	Actinomycetia	Geodermatophilales	Geodermatophilaceae	Blastococcus	Blastococcus sp. CT_GayMR19	95	197	9	160	237	204	57	17	49	277	63	58	455	555	554	98	260
Bacteria	Actinobacteria	Actinomycetia	Geodermatophilales	Geodermatophilaceae	Blastococcus	Blastococcus sp. CT_GayMR20	52	142	5	211	120	206	34	32	46	395	61	96	448	318	230	72	184
Bacteria	Actinobacteria	Actinomycetia	Geodermatophilales	Geodermatophilaceae	Blastococcus	Blastococcus sp. DSM 44205	51	137	1	88	94	189	31	14	46	140	48	66	271	216	75	93	368
Bacteria	Actinobacteria	Actinomycetia	Geodermatophilales	Geodermatophilaceae	Blastococcus	Blastococcus sp. DSM 44268	75	525	1	278	94	237	78	59	115	417	206	78	605	431	284	120	2069
Bacteria	Actinobacteria	Actinomycetia	Geodermatophilales	Geodermatophilaceae	Blastococcus	Blastococcus sp. DSM 44270	76	135	5	154	126	129	60	26	5	244	35	90	232	179	316	80	335
Bacteria	Actinobacteria	Actinomycetia	Geodermatophilales	Geodermatophilaceae	Blastococcus	Blastococcus sp. DSM 44272	69	146	7	219	101	679	81	62	110	412	43	144	386	419	392	126	206
Bacteria	Actinobacteria	Actinomycetia	Geodermatophilales	Geodermatophilaceae	Blastococcus	Blastococcus sp. DSM 46786	2	125	0	28	184	140	56	32	118	176	25	21	254	195	277	86	17
Bacteria	Actinobacteria	Actinomycetia	Geodermatophilales	Geodermatophilaceae	Blastococcus	Blastococcus sp. DSM 46790	40	279	3	553	90	153	87	95	140	459	179	66	686	554	233	112	551
Bacteria	Actinobacteria	Actinomycetia	Geodermatophilales	Geodermatophilaceae	Blastococcus	Blastococcus sp. DSM 46838	60	161	5	140	116	100	43	4	73	155	51	75	309	360	299	84	208
Bacteria	Actinobacteria	Actinomycetia	Geodermatophilales	Geodermatophilaceae	Blastococcus	Blastococcus sp. Marseille-P5729	35	55	3	95	62	170	19	67	73	107	37	86	132	134	163	50	322
Bacteria	Actinobacteria	Actinomycetia	Geodermatophilales	Geodermatophilaceae	Blastococcus	Blastococcus sp. TBT05-19	42	47	2	65	25	126	18	28	19	132	113	72	202	114	168	42	151
Bacteria	Actinobacteria	Actinomycetia	Geodermatophilales	Geodermatophilaceae	Blastococcus	Blastococcus sp. TF02-8	72	124	0	143	93	149	32	21	1	177	95	34	205	171	195	37	91
Bacteria	Actinobacteria	Actinomycetia	Geodermatophilales	Geodermatophilaceae	Blastococcus	Blastococcus sp. TF02-9	74	266	2	255	66	165	24	29	84	322	176	102	673	102	125	120	1346
Bacteria	Actinobacteria	Actinomycetia	Geodermatophilales	Geodermatophilaceae	Blastococcus	Blastococcus sp. TF02A-26	43	163	44	130	192	723	22	94	111	308	94	33	446	753	216	113	136
Bacteria	Actinobacteria	Actinomycetia	Geodermatophilales	Geodermatophilaceae	Blastococcus	Blastococcus sp. TF02A-30	75	212	2	164	6	186	25	13	56	338	90	76	279	72	238	110	231
Bacteria	Actinobacteria	Actinomycetia	Geodermatophilales	Geodermatophilaceae	Blastococcus	Blastococcus sp. TF02A_35	0	83	3	133	15	69	7	53	24	59	24	0	146	327	103	15	79
Bacteria	Actinobacteria	Actinomycetia	Geodermatophilales	Geodermatophilaceae	Blastococcus	Blastococcus sp. TML/C7B	0	10	0	0	45	0	0	1	0	81	10	1	72	0	89	1	80
Bacteria	Actinobacteria	Actinomycetia	Geodermatophilales	Geodermatophilaceae	Blastococcus	Blastococcus sp. TML/M2B	0	2	0	1	10	26	13	10	28	22	0	0	57	0	11	7	73
Bacteria	Actinobacteria	Actinomycetia	Geodermatophilales	Geodermatophilaceae	Blastococcus	Blastococcus sp. URHD0036	91	304	3	232	249	190	64	77	179	396	131	103	322	238	379	76	172
Bacteria	Actinobacteria	Actinomycetia	Geodermatophilales	Geodermatophilaceae	Blastococcus	Blastococcus xanthinilyticus	75	165	9	64	98	205	18	39	50	151	12	3	388	609	193	38	208
Bacteria	Actinobacteria	Actinomycetia	Geodermatophilales	Geodermatophilaceae	Blastococcus	Candidatus Blastococcus massiliensis	121	98	3	46	62	126	15	11	41	116	59	30	336	35	191	55	587
Bacteria	Actinobacteria	Actinomycetia	Geodermatophilales	Geodermatophilaceae	Blastococcus	uncultured Blastococcus sp.	102	360	10	316	303	322	92	99	158	530	112	237	541	501	665	219	504
Bacteria	Actinobacteria	Actinomycetia	Geodermatophilales	Geodermatophilaceae	Geodermatophilus	Geodermatophilus africanus	118	187	3	98	125	209	59	83	101	348	53	28	646	208	259	259	299
Bacteria	Actinobacteria	Actinomycetia	Geodermatophilales	Geodermatophilaceae	Geodermatophilus	Geodermatophilus amargosae	50	161	31	153	86	89	26	8	71	152	8	80	121	231	244	86	269
Bacteria	Actinobacteria	Actinomycetia	Geodermatophilales	Geodermatophilaceae	Geodermatophilus	Geodermatophilus aquaeductus	9	61	1	82	17	63	7	19	28	99	38	81	146	186	108	26	209
Bacteria	Actinobacteria	Actinomycetia	Geodermatophilales	Geodermatophilaceae	Geodermatophilus	Geodermatophilus chilensis	505	395	482	397	903	201	64	42	6	124	35	121	512	366	431	121	196
Bacteria	Actinobacteria	Actinomycetia	Geodermatophilales	Geodermatophilaceae	Geodermatophilus	Geodermatophilus daqingensis	92	160	3	75	162	209	37	40	57	464	83	84	448	823	276	116	122
Bacteria	Actinobacteria	Actinomycetia	Geodermatophilales	Geodermatophilaceae	Geodermatophilus	Geodermatophilus dictyosporus	29	65	5	18	111	29	2	0	73	145	45	40	160	136	68	11	41
Bacteria	Actinobacteria	Actinomycetia	Geodermatophilales	Geodermatophilaceae	Geodermatophilus	Geodermatophilus nigrescens	3	67	4	624	162	57	29	4	61	182	34	1	232	321	116	33	343
Bacteria	Actinobacteria	Actinomycetia	Geodermatophilales	Geodermatophilaceae	Geodermatophilus	Geodermatophilus normandii	41	196	8	100	72	157	33	11	144	253	57	191	368	352	316	123	228
Bacteria	Actinobacteria	Actinomycetia	Geodermatophilales	Geodermatophilaceae	Geodermatophilus	Geodermatophilus obscurus	160	322	27	104	321	656	75	48	186	679	141	168	916	848	1135	249	723
Bacteria	Actinobacteria	Actinomycetia	Geodermatophilales	Geodermatophilaceae	Geodermatophilus	Geodermatophilus poikilotrophus	70	201	3	59	85	114	16	78	12	118	9	19	234	248	127	47	76
Bacteria	Actinobacteria	Actinomycetia	Geodermatophilales	Geodermatophilaceae	Geodermatophilus	Geodermatophilus pulveris	50	108	7	37	54	116	47	24	21	111	26	37	387	245	101	54	154
Bacteria	Actinobacteria	Actinomycetia	Geodermatophilales	Geodermatophilaceae	Geodermatophilus	Geodermatophilus ruber	74	173	2	136	223	406	47	32	29	225	100	95	394	397	344	106	217
Bacteria	Actinobacteria	Actinomycetia	Geodermatophilales	Geodermatophilaceae	Geodermatophilus	Geodermatophilus sabuli	99	378	13	244	373	343	78	42	155	728	112	79	901	791	493	102	595
Bacteria	Actinobacteria	Actinomycetia	Geodermatophilales	Geodermatophilaceae	Geodermatophilus	Geodermatophilus saharensis	8	71	3	20	76	259	36	26	78	188	59	74	233	202	172	90	204
Bacteria	Actinobacteria	Actinomycetia	Geodermatophilales	Geodermatophilaceae	Geodermatophilus	Geodermatophilus siccatus	23	144	1	144	47	96	95	36	67	154	22	47	349	239	185	54	326
Bacteria	Actinobacteria	Actinomycetia	Geodermatophilales	Geodermatophilaceae	Geodermatophilus	Geodermatophilus sp. DF01_2	39	107	4	47	57	119	19	45	103	122	134	71	283	309	356	52	235
Bacteria	Actinobacteria	Actinomycetia	Geodermatophilales	Geodermatophilaceae	Geodermatophilus	Geodermatophilus sp. DSM 44511	78	96	4	31	64	33	31	17	67	177	64	10	214	269	46	69	38
Bacteria	Actinobacteria	Actinomycetia	Geodermatophilales	Geodermatophilaceae	Geodermatophilus	Geodermatophilus sp. DSM 44513	71	144	6	75	146	132	23	24	23	175	19	64	550	416	169	65	472
Bacteria	Actinobacteria	Actinomycetia	Geodermatophilales	Geodermatophilaceae	Geodermatophilus	Geodermatophilus sp. DSM 45219	90	228	4	191	26	227	2	34	55	293	59	61	593	366	197	88	348
Bacteria	Actinobacteria	Actinomycetia	Geodermatophilales	Geodermatophilaceae	Geodermatophilus	Geodermatophilus sp. Leaf369	0	6	2	0	31	1	11	9	19	21	9	43	65	42	23	16	54
Bacteria	Actinobacteria	Actinomycetia	Geodermatophilales	Geodermatophilaceae	Geodermatophilus	Geodermatophilus sp. LHW52908	50	113	9	109	154	271	59	36	76	209	78	245	621	840	260	179	375
Bacteria	Actinobacteria	Actinomycetia	Geodermatophilales	Geodermatophilaceae	Geodermatophilus	Geodermatophilus sp. TF02-6	24	165	4	111	93	165	32	23	94	291	94	101	254	457	195	91	118
Bacteria	Actinobacteria	Actinomycetia	Geodermatophilales	Geodermatophilaceae	Geodermatophilus	Geodermatophilus telluris	18	72	1	61	70	72	12	4	3	141	28	65	162	189	96	35	192
Bacteria	Actinobacteria	Actinomycetia	Geodermatophilales	Geodermatophilaceae	Geodermatophilus	Geodermatophilus tzadiensis	5	59	0	83	28	65	9	9	22	189	8	101	115	258	135	59	136
Bacteria	Actinobacteria	Actinomycetia	Geodermatophilales	Geodermatophilaceae	Modestobacter	Modestobacter altitudinis	78	141	3	52	91	396	36	16	0	140	111	91	413	392	172	108	288
Bacteria	Actinobacteria	Actinomycetia	Geodermatophilales	Geodermatophilaceae	Modestobacter	Modestobacter caceresii	1	18	2	47	0	17	5	19	13	20	57	1	56	85	0	21	117
Bacteria	Actinobacteria	Actinomycetia	Geodermatophilales	Geodermatophilaceae	Modestobacter	Modestobacter excelsi	17	104	1	104	134	160	18	74	1	194	51	19	366	460	267	106	306
Bacteria	Actinobacteria	Actinomycetia	Geodermatophilales	Geodermatophilaceae	Modestobacter	Modestobacter marinus	87	525	8	294	175	435	107	61	143	651	315	174	815	665	320	321	1760
Bacteria	Actinobacteria	Actinomycetia	Geodermatophilales	Geodermatophilaceae	Modestobacter	Modestobacter multiseptatus	80	222	14	96	164	332	55	62	99	231	127	91	711	810	785	100	478
Bacteria	Actinobacteria	Actinomycetia	Geodermatophilales	Geodermatophilaceae	Modestobacter	Modestobacter muralis	50	243	3	235	62	104	22	64	11	298	96	26	396	677	374	127	344
Bacteria	Actinobacteria	Actinomycetia	Geodermatophilales	Geodermatophilaceae	Modestobacter	Modestobacter roseus	31	120	10	80	44	72	52	6	29	253	39	18	223	501	273	65	206
Bacteria	Actinobacteria	Actinomycetia	Geodermatophilales	Geodermatophilaceae	Modestobacter	Modestobacter sp. DSM 44400	86	218	10	244	116	240	52	40	199	301	124	40	415	627	525	60	264
Bacteria	Actinobacteria	Actinomycetia	Geodermatophilales	Geodermatophilaceae	Modestobacter	Modestobacter sp. DSM 46791	92	254	5	113	215	107	28	85	89	379	261	184	570	510	513	208	216
Bacteria	Actinobacteria	Actinomycetia	Geodermatophilales	Geodermatophilaceae	Modestobacter	Modestobacter sp. I12A-02628	6	6	0	0	11	0	3	22	0	9	0	0	1	0	0	28	0
Bacteria	Actinobacteria	Actinomycetia	Geodermatophilales	Geodermatophilaceae	Modestobacter	Modestobacter sp. KNN46-3	14	29	0	30	1	4	25	23	34	47	24	1	134	43	77	67	94
Bacteria	Actinobacteria	Actinomycetia	Geodermatophilales	Geodermatophilaceae	Modestobacter	Modestobacter sp. Leaf380	42	164	7	96	74	120	46	51	202	260	50	68	233	317	71	33	197
Bacteria	Actinobacteria	Actinomycetia	Geodermatophilales	Geodermatophilaceae	Modestobacter	Modestobacter sp. VKM Ac-2676	13	105	5	23	25	111	12	16	47	112	66	27	206	114	215	43	75
Bacteria	Actinobacteria	Actinomycetia	Geodermatophilales	Geodermatophilaceae	Modestobacter	Modestobacter versicolor	20	172	3	147	197	211	34	57	54	329	56	22	387	600	71	48	187
Bacteria	Actinobacteria	Actinomycetia	Jatrophihabitantales	Jatrophihabitantaceae	Jatrophihabitans	Jatrophihabitans endophyticus	115	193	4	577	249	300	51	75	80	406	42	66	535	1147	393	143	335
Bacteria	Actinobacteria	Actinomycetia	Jatrophihabitantales	Jatrophihabitantaceae	Jatrophihabitans	Jatrophihabitans sp. GAS493	45	116	1	59	11	196	18	31	28	212	50	4	317	237	76	39	270
Bacteria	Actinobacteria	Actinomycetia	Jatrophihabitantales	Jatrophihabitantaceae	Jatrophihabitans	Jatrophihabitans sp.	57	93	2	88	100	488	66	61	91	81	79	165	438	1070	458	65	138
Bacteria	Actinobacteria	Actinomycetia	Kineosporiales	Kineosporiaceae	Quadrisphaera	Quadrisphaera granulorum	40	209	5	100	70	454	5	22	13	119	57	134	286	484	161	55	98
Bacteria	Actinobacteria	Actinomycetia	Kineosporiales	Kineosporiaceae	Quadrisphaera	Quadrisphaera sp. DD2A	55	70	1	114	115	94	67	8	208	169	101	124	266	119	154	106	183
Bacteria	Actinobacteria	Actinomycetia	Kineosporiales	Kineosporiaceae	Quadrisphaera	Quadrisphaera sp. DSM 44207	186	238	8	371	363	469	49	39	221	405	105	124	720	867	487	161	361
Bacteria	Actinobacteria	Actinomycetia	Kineosporiales	Kineosporiaceae	Quadrisphaera	Quadrisphaera sp. INWT6	71	103	1	120	150	148	32	6	112	177	87	123	279	504	159	75	140
Bacteria	Actinobacteria	Actinomycetia	Kineosporiales	Kineosporiaceae	Quadrisphaera	Quadrisphaera sp. RL12-1S	25	135	3	22	65	133	12	28	47	282	28	47	262	214	85	119	261
Bacteria	Actinobacteria	Actinomycetia	Kineosporiales	Kineosporiaceae	Quadrisphaera	uncultured Quadrisphaera sp.	52	331	6	228	247	297	59	32	156	284	93	201	564	843	287	165	346
Bacteria	Actinobacteria	Actinomycetia	Micrococcales	Beutenbergiaceae	Beutenbergia	Beutenbergia cavernae	58	227	3	105	81	397	41	34	131	329	18	91	418	656	220	58	307
Bacteria	Actinobacteria	Actinomycetia	Micrococcales	Bogoriellaceae	Georgenia	Georgenia faecalis	48	68	2	123	62	84	21	8	22	223	101	133	313	635	192	76	113
Bacteria	Actinobacteria	Actinomycetia	Micrococcales	Bogoriellaceae	Georgenia	Georgenia muralis	121	114	2	71	172	659	8	49	15	206	67	99	448	327	291	123	703
Bacteria	Actinobacteria	Actinomycetia	Micrococcales	Bogoriellaceae	Georgenia	Georgenia ruanii	21	128	4	23	79	150	13	48	76	82	16	107	186	312	98	64	166
Bacteria	Actinobacteria	Actinomycetia	Micrococcales	Bogoriellaceae	Georgenia	Georgenia satyanarayanai	93	138	5	112	19	1007	43	52	28	300	161	142	517	761	299	85	215
Bacteria	Actinobacteria	Actinomycetia	Micrococcales	Bogoriellaceae	Georgenia	Georgenia soli	20	138	3	51	80	54	15	6	66	138	23	69	365	391	123	96	249
Bacteria	Actinobacteria	Actinomycetia	Micrococcales	Bogoriellaceae	Georgenia	Georgenia sp. 311	0	25	0	0	0	1	0	0	0	44	17	0	33	0	27	7	47
Bacteria	Actinobacteria	Actinomycetia	Micrococcales	Bogoriellaceae	Georgenia	Georgenia sp. SUBG003	1	21	0	1	17	13	3	2	14	62	0	52	48	163	31	22	8
Bacteria	Actinobacteria	Actinomycetia	Micrococcales	Bogoriellaceae	Georgenia	Georgenia sp. SYP-B2076	3	117	4	56	70	213	36	72	11	165	55	2	257	369	148	32	166
Bacteria	Actinobacteria	Actinomycetia	Micrococcales	Bogoriellaceae	Georgenia	Georgenia sp. Z294	0	1	0	1	0	8	3	0	0	0	1	38	0	0	0	1	0
Bacteria	Actinobacteria	Actinomycetia	Micrococcales	Bogoriellaceae	Georgenia	Georgenia sp. Z443	33	44	0	56	12	122	12	14	33	61	0	41	69	63	41	20	11
Bacteria	Actinobacteria	Actinomycetia	Micrococcales	Bogoriellaceae	Georgenia	Georgenia sp. Z446	20	60	2	90	71	29	7	23	1	86	25	1	184	652	91	11	59
Bacteria	Actinobacteria	Actinomycetia	Micrococcales	Bogoriellaceae	Georgenia	Georgenia subflava	62	82	4	131	119	173	33	1	38	132	35	28	244	152	111	59	223
Bacteria	Actinobacteria	Actinomycetia	Micrococcales	Bogoriellaceae	Georgenia	Georgenia thermotolerans	27	60	1	54	67	37	18	22	41	85	39	17	177	205	79	11	81
Bacteria	Actinobacteria	Actinomycetia	Micrococcales	Brevibacteriaceae	Brevibacterium	Brevibacterium album	65	85	2	52	51	133	27	39	27	101	54	22	207	285	113	32	48
Bacteria	Actinobacteria	Actinomycetia	Micrococcales	Brevibacteriaceae	Brevibacterium	Brevibacterium antiquum	6	109	5	50	124	50	44	27	24	135	24	27	51	46	113	82	269
Bacteria	Actinobacteria	Actinomycetia	Micrococcales	Brevibacteriaceae	Brevibacterium	Brevibacterium aurantiacum	160	296	1	151	236	174	51	85	144	657	97	118	499	445	396	259	285
Bacteria	Actinobacteria	Actinomycetia	Micrococcales	Brevibacteriaceae	Brevibacterium	Brevibacterium casei	106	271	1	178	267	172	33	53	134	357	101	97	613	384	132	95	164
Bacteria	Actinobacteria	Actinomycetia	Micrococcales	Brevibacteriaceae	Brevibacterium	Brevibacterium epidermidis	0	8	0	20	0	38	2	0	0	0	21	5	56	22	0	15	2
Bacteria	Actinobacteria	Actinomycetia	Micrococcales	Brevibacteriaceae	Brevibacterium	Brevibacterium ihuae	424	1024	2	1044	740	763	281	506	892	970	430	731	1401	938	1738	484	1147
Bacteria	Actinobacteria	Actinomycetia	Micrococcales	Brevibacteriaceae	Brevibacterium	Brevibacterium iodinum	2	80	0	42	0	49	0	0	0	55	0	41	32	12	2	36	64
Bacteria	Actinobacteria	Actinomycetia	Micrococcales	Brevibacteriaceae	Brevibacterium	Brevibacterium jeotgali	58	72	1	20	31	85	0	11	4	76	55	1	206	70	64	16	30
Bacteria	Actinobacteria	Actinomycetia	Micrococcales	Brevibacteriaceae	Brevibacterium	Brevibacterium linens	31	113	0	90	50	73	15	22	55	206	15	11	236	246	27	17	63
Bacteria	Actinobacteria	Actinomycetia	Micrococcales	Brevibacteriaceae	Brevibacterium	Brevibacterium luteolum	293	1493	2	471	261	457	140	132	263	1167	219	363	1461	608	367	305	629
Bacteria	Actinobacteria	Actinomycetia	Micrococcales	Brevibacteriaceae	Brevibacterium	Brevibacterium marinum	47	94	14	22	62	122	14	1	24	111	3	1	169	13	4	45	13
Bacteria	Actinobacteria	Actinomycetia	Micrococcales	Brevibacteriaceae	Brevibacterium	Brevibacterium mcbrellneri	167	1790	4	452	310	329	107	315	317	1507	312	281	2843	355	470	437	651
Bacteria	Actinobacteria	Actinomycetia	Micrococcales	Brevibacteriaceae	Brevibacterium	Brevibacterium oceani	18	55	0	13	3	55	1	1	12	45	31	17	36	74	26	16	2
Bacteria	Actinobacteria	Actinomycetia	Micrococcales	Brevibacteriaceae	Brevibacterium	Brevibacterium paucivorans	564	5947	5	1676	1115	1367	426	649	894	5919	1123	1462	8654	1491	2308	1071	2073
Bacteria	Actinobacteria	Actinomycetia	Micrococcales	Brevibacteriaceae	Brevibacterium	Brevibacterium permense	20	0	1	0	0	12	0	0	0	40	0	22	69	29	41	18	10
Bacteria	Actinobacteria	Actinomycetia	Micrococcales	Brevibacteriaceae	Brevibacterium	Brevibacterium ravenspurgense	0	144	0	38	50	76	19	18	58	198	36	43	419	13	51	35	66
Bacteria	Actinobacteria	Actinomycetia	Micrococcales	Brevibacteriaceae	Brevibacterium	Brevibacterium sandarakinum	1	102	0	0	23	142	24	3	39	199	9	21	154	215	39	23	2
Bacteria	Actinobacteria	Actinomycetia	Micrococcales	Brevibacteriaceae	Brevibacterium	Brevibacterium sediminis	16	0	0	12	0	15	0	0	0	11	11	0	0	0	0	13	0
Bacteria	Actinobacteria	Actinomycetia	Micrococcales	Brevibacteriaceae	Brevibacterium	Brevibacterium senegalense	103	269	0	153	170	308	13	32	137	100	108	254	244	129	57	57	469
Bacteria	Actinobacteria	Actinomycetia	Micrococcales	Brevibacteriaceae	Brevibacterium	Brevibacterium siliguriense	0	37	0	1	0	47	11	20	5	43	13	1	17	3	21	22	2
Bacteria	Actinobacteria	Actinomycetia	Micrococcales	Brevibacteriaceae	Brevibacterium	Brevibacterium sp. 'Marine'	24	1	3	0	1	34	9	0	1	43	8	0	60	19	1	10	0
Bacteria	Actinobacteria	Actinomycetia	Micrococcales	Brevibacteriaceae	Brevibacterium	Brevibacterium sp. 239c	0	20	0	0	0	63	0	6	0	37	12	0	41	37	1	20	53
Bacteria	Actinobacteria	Actinomycetia	Micrococcales	Brevibacteriaceae	Brevibacterium	Brevibacterium sp. 2SA	4	9	0	30	0	0	0	3	43	46	9	0	23	55	1	26	29
Bacteria	Actinobacteria	Actinomycetia	Micrococcales	Brevibacteriaceae	Brevibacterium	Brevibacterium sp. 5221	52	70	3	1	40	28	6	26	61	129	63	157	285	286	39	57	187
Bacteria	Actinobacteria	Actinomycetia	Micrococcales	Brevibacteriaceae	Brevibacterium	Brevibacterium sp. CS2	5988	10661	4	9861	7168	7994	2732	4833	8456	10401	4201	8183	14390	8066	15525	4378	12376
Bacteria	Actinobacteria	Actinomycetia	Micrococcales	Brevibacteriaceae	Brevibacterium	Brevibacterium sp. FME17	0	13	1	0	1	8	14	0	1	7	0	0	0	0	0	6	18
Bacteria	Actinobacteria	Actinomycetia	Micrococcales	Brevibacteriaceae	Brevibacterium	Brevibacterium sp. FME37	13	74	0	5	1	42	0	0	3	2	0	25	70	18	0	1	2
Bacteria	Actinobacteria	Actinomycetia	Micrococcales	Brevibacteriaceae	Brevibacterium	Brevibacterium sp. HMSC063G07	3	33	0	37	0	0	0	4	13	14	1	14	9	0	37	1	0
Bacteria	Actinobacteria	Actinomycetia	Micrococcales	Brevibacteriaceae	Brevibacterium	Brevibacterium sp. HMSC22B09	0	19	0	22	0	0	0	2	1	27	0	11	62	6	24	22	0
Bacteria	Actinobacteria	Actinomycetia	Micrococcales	Brevibacteriaceae	Brevibacterium	Brevibacterium sp. HMSC24B04	8	19	0	19	0	42	0	5	15	34	27	16	20	1	6	7	2
Bacteria	Actinobacteria	Actinomycetia	Micrococcales	Brevibacteriaceae	Brevibacterium	Brevibacterium sp. Marseille-P9724	0	30	0	0	0	0	15	0	0	24	0	0	6	15	1	1	0
Bacteria	Actinobacteria	Actinomycetia	Micrococcales	Brevibacteriaceae	Brevibacterium	Brevibacterium sp. MG-1	5	4	0	1	26	1	0	0	0	50	0	0	27	1	0	12	0
Bacteria	Actinobacteria	Actinomycetia	Micrococcales	Brevibacteriaceae	Brevibacterium	Brevibacterium sp. Mu109	12	96	1	39	53	30	5	7	17	38	19	38	100	29	41	29	83
Bacteria	Actinobacteria	Actinomycetia	Micrococcales	Brevibacteriaceae	Brevibacterium	Brevibacterium sp. o2	0	38	0	1	1	52	2	21	2	2	0	1	78	4	17	17	0
Bacteria	Actinobacteria	Actinomycetia	Micrococcales	Brevibacteriaceae	Brevibacterium	Brevibacterium sp. Re57	31	50	0	0	59	47	39	5	41	100	27	8	191	6	4	13	15
Bacteria	Actinobacteria	Actinomycetia	Micrococcales	Brevibacteriaceae	Brevibacterium	Brevibacterium sp. S111	31	39	0	0	19	281	30	28	8	35	38	2	54	8	19	147	2
Bacteria	Actinobacteria	Actinomycetia	Micrococcales	Brevibacteriaceae	Brevibacterium	Brevibacterium sp. S22	4	22	0	27	0	44	4	10	0	35	0	53	52	19	90	11	2
Bacteria	Actinobacteria	Actinomycetia	Micrococcales	Brevibacteriaceae	Brevibacterium	Brevibacterium sp. VCM10	0	6	0	0	0	78	0	0	0	26	0	0	23	0	0	16	1
Bacteria	Actinobacteria	Actinomycetia	Micrococcales	Brevibacteriaceae	Brevibacterium	Brevibacterium sp. WO024	0	3	0	15	0	18	0	4	24	34	21	13	21	31	50	29	57
Bacteria	Actinobacteria	Actinomycetia	Micrococcales	Brevibacteriaceae	Brevibacterium	Brevibacterium sp. XM4083	0	62	0	0	1	70	0	15	0	32	2	0	32	30	29	8	214
Bacteria	Actinobacteria	Actinomycetia	Micrococcales	Brevibacteriaceae	Brevibacterium	Brevibacterium sp. YB235	0	41	0	0	19	39	0	0	3	0	2	116	30	0	0	20	53
Bacteria	Actinobacteria	Actinomycetia	Micrococcales	Brevibacteriaceae	Brevibacterium	Brevibacterium yomogidense	67	102	3	86	31	233	41	18	21	163	103	42	313	713	69	59	202
Bacteria	Actinobacteria	Actinomycetia	Micrococcales	Cellulomonadaceae	Actinotalea	Actinotalea caeni	46	182	13	105	79	129	19	15	25	440	39	106	352	406	177	123	375
Bacteria	Actinobacteria	Actinomycetia	Micrococcales	Cellulomonadaceae	Actinotalea	Actinotalea fermentans	25	69	10	78	112	138	35	65	55	55	82	44	233	164	120	43	283
Bacteria	Actinobacteria	Actinomycetia	Micrococcales	Cellulomonadaceae	Actinotalea	Actinotalea ferrariae	237	158	102	70	52	146	366	252	59	86	43	80	233	402	337	31	257
Bacteria	Actinobacteria	Actinomycetia	Micrococcales	Cellulomonadaceae	Actinotalea	Actinotalea solisilvae	31	128	3	50	56	125	30	12	121	375	108	122	298	303	228	49	188
Bacteria	Actinobacteria	Actinomycetia	Micrococcales	Cellulomonadaceae	Actinotalea	Actinotalea sp. HO-Ch2	39	93	2	91	106	275	34	50	52	147	3	63	348	223	225	17	223
Bacteria	Actinobacteria	Actinomycetia	Micrococcales	Cellulomonadaceae	Actinotalea	Actinotalea sp. JY-7876	1	9	0	5	0	0	9	0	0	19	0	0	36	15	3	1	0
Bacteria	Actinobacteria	Actinomycetia	Micrococcales	Dermacoccaceae	Dermacoccus	Dermacoccus abyssi	2	89	1	0	20	65	13	2	10	70	0	0	113	217	45	19	81
Bacteria	Actinobacteria	Actinomycetia	Micrococcales	Dermacoccaceae	Dermacoccus	Dermacoccus nishinomiyaensis	28	126	3	74	265	124	53	33	107	175	123	87	185	175	10	36	155
Bacteria	Actinobacteria	Actinomycetia	Micrococcales	Dermacoccaceae	Dermacoccus	Dermacoccus sp. 147Ba	0	34	0	11	0	0	2	0	14	23	0	0	20	17	0	17	0
Bacteria	Actinobacteria	Actinomycetia	Micrococcales	Dermacoccaceae	Dermacoccus	Dermacoccus sp. Ellin185	0	13	0	0	50	0	1	0	0	36	0	0	45	0	0	9	66
Bacteria	Actinobacteria	Actinomycetia	Micrococcales	Dermacoccaceae	Dermacoccus	Dermacoccus sp. PE3	3	21	0	0	53	42	0	0	46	13	2	51	16	39	11	24	53
Bacteria	Actinobacteria	Actinomycetia	Micrococcales	Dermacoccaceae	Dermacoccus	Dermacoccus sp. SAI-028	26	0	0	0	23	0	0	0	0	18	3	22	16	1	26	15	0
Bacteria	Actinobacteria	Actinomycetia	Micrococcales	Intrasporangiaceae	Janibacter	Janibacter alkaliphilus	40	61	3	73	44	222	35	39	50	156	20	32	469	602	227	87	882
Bacteria	Actinobacteria	Actinomycetia	Micrococcales	Intrasporangiaceae	Janibacter	Janibacter anophelis	23	94	2	153	90	882	23	66	44	178	65	3	207	381	61	80	747
Bacteria	Actinobacteria	Actinomycetia	Micrococcales	Intrasporangiaceae	Janibacter	Janibacter corallicola	22	35	2	51	68	238	30	14	32	110	1	23	98	466	87	60	314
Bacteria	Actinobacteria	Actinomycetia	Micrococcales	Intrasporangiaceae	Janibacter	Janibacter cremeus	12	64	6	57	22	57	7	25	96	151	117	69	151	2054	247	40	239
Bacteria	Actinobacteria	Actinomycetia	Micrococcales	Intrasporangiaceae	Janibacter	Janibacter hoylei	91	78	0	133	287	466	123	12	202	187	139	102	323	236	70	80	700
Bacteria	Actinobacteria	Actinomycetia	Micrococcales	Intrasporangiaceae	Janibacter	Janibacter indicus	60	137	1	220	199	936	25	27	90	215	7	136	340	442	17	56	1480
Bacteria	Actinobacteria	Actinomycetia	Micrococcales	Intrasporangiaceae	Janibacter	Janibacter limosus	37	87	4	138	36	111	28	8	44	389	49	3	182	281	136	14	291
Bacteria	Actinobacteria	Actinomycetia	Micrococcales	Intrasporangiaceae	Janibacter	Janibacter massiliensis	27	31	5	43	71	69	32	31	16	89	26	27	182	250	134	15	147
Bacteria	Actinobacteria	Actinomycetia	Micrococcales	Intrasporangiaceae	Janibacter	Janibacter melonis	129	452	7	146	146	3212	69	66	348	561	275	245	709	469	289	204	2305
Bacteria	Actinobacteria	Actinomycetia	Micrococcales	Intrasporangiaceae	Janibacter	Janibacter sp. HTCC2649	2	57	9	117	99	97	28	27	157	134	110	67	275	192	42	38	83
Bacteria	Actinobacteria	Actinomycetia	Micrococcales	Intrasporangiaceae	Janibacter	Janibacter sp. Soil728	4	41	0	54	41	28	31	0	0	130	44	120	128	339	13	46	81
Bacteria	Actinobacteria	Actinomycetia	Micrococcales	Intrasporangiaceae	Janibacter	Janibacter sp. YB324	1	15	0	50	0	56	4	0	15	4	0	78	15	41	0	24	369
Bacteria	Actinobacteria	Actinomycetia	Micrococcales	Intrasporangiaceae	Janibacter	Janibacter terrae	13	50	1	24	29	172	7	27	28	135	37	3	128	258	135	35	191
Bacteria	Actinobacteria	Actinomycetia	Micrococcales	Intrasporangiaceae	Knoellia	Knoellia aerolata	78	230	1	144	28	263	45	41	90	401	80	316	511	521	215	99	213
Bacteria	Actinobacteria	Actinomycetia	Micrococcales	Intrasporangiaceae	Knoellia	Knoellia flava	57	250	2	234	9	326	47	49	162	246	125	172	454	199	476	116	360
Bacteria	Actinobacteria	Actinomycetia	Micrococcales	Intrasporangiaceae	Knoellia	Knoellia locipacati	57	70	3	48	35	300	36	31	135	59	99	103	248	246	181	56	177
Bacteria	Actinobacteria	Actinomycetia	Micrococcales	Intrasporangiaceae	Knoellia	Knoellia remsis	31	159	5	6	56	141	18	12	73	122	39	80	171	308	69	25	206
Bacteria	Actinobacteria	Actinomycetia	Micrococcales	Intrasporangiaceae	Knoellia	Knoellia sinensis	37	81	3	35	46	82	8	28	104	142	23	47	220	255	175	32	240
Bacteria	Actinobacteria	Actinomycetia	Micrococcales	Intrasporangiaceae	Knoellia	Knoellia sp. DB2414S	73	138	3	129	87	82	73	15	20	144	57	34	486	282	95	69	181
Bacteria	Actinobacteria	Actinomycetia	Micrococcales	Intrasporangiaceae	Knoellia	Knoellia sp. Soil729	21	98	1	97	30	148	75	31	92	51	18	106	191	242	117	67	83
Bacteria	Actinobacteria	Actinomycetia	Micrococcales	Intrasporangiaceae	Knoellia	Knoellia subterranea	26	103	5	10	70	775	15	38	60	74	9	61	213	42	165	38	454
Bacteria	Actinobacteria	Actinomycetia	Micrococcales	Microbacteriaceae	Conyzicola	Conyzicola lurida	15	83	2	2	33	38	52	38	1	104	4778	30	98	424	52	25	140
Bacteria	Actinobacteria	Actinomycetia	Micrococcales	Microbacteriaceae	Conyzicola	Conyzicola nivalis	48	78	2	108	28	108	43	12	86	209	4735	41	76	636	35	33	163
Bacteria	Actinobacteria	Actinomycetia	Micrococcales	Microbacteriaceae	Curtobacterium	Curtobacterium ammoniigenes	1	29	2	85	36	84	4	6	4	66	72	70	171	472	25	6	10
Bacteria	Actinobacteria	Actinomycetia	Micrococcales	Microbacteriaceae	Curtobacterium	Curtobacterium citreum	12	19	0	1	0	2	3	0	0	0	0	0	13	0	39	7	0
Bacteria	Actinobacteria	Actinomycetia	Micrococcales	Microbacteriaceae	Curtobacterium	Curtobacterium flaccumfaciens	3	132	4	116	41	55	14	0	38	106	6	47	163	303	93	78	81
Bacteria	Actinobacteria	Actinomycetia	Micrococcales	Microbacteriaceae	Curtobacterium	Curtobacterium luteum	0	9	2	89	31	52	6	9	21	72	18	0	87	28	46	18	30
Bacteria	Actinobacteria	Actinomycetia	Micrococcales	Microbacteriaceae	Curtobacterium	Curtobacterium oceanosedimentum	0	18	0	9	22	34	0	2	1	26	50	0	32	63	1	18	18
Bacteria	Actinobacteria	Actinomycetia	Micrococcales	Microbacteriaceae	Curtobacterium	Curtobacterium pusillum	20	134	1	1	3	125	13	35	18	280	85	2	185	698	262	91	152
Bacteria	Actinobacteria	Actinomycetia	Micrococcales	Microbacteriaceae	Curtobacterium	Curtobacterium sp. 'Ferrero'	9	22	1	0	0	3	1	13	48	49	46	21	61	349	1	16	30
Bacteria	Actinobacteria	Actinomycetia	Micrococcales	Microbacteriaceae	Curtobacterium	Curtobacterium sp. 314Chir4.1	486	1222	1	671	602	913	534	392	889	2486	751	636	1748	795	983	1210	1466
Bacteria	Actinobacteria	Actinomycetia	Micrococcales	Microbacteriaceae	Curtobacterium	Curtobacterium sp. 8I-2	40	125	1	170	8	153	42	68	76	271	73	23	269	64	159	54	284
Bacteria	Actinobacteria	Actinomycetia	Micrococcales	Microbacteriaceae	Curtobacterium	Curtobacterium sp. 9128	10	35	13	96	41	48	22	10	4	89	85	58	210	66	55	59	48
Bacteria	Actinobacteria	Actinomycetia	Micrococcales	Microbacteriaceae	Curtobacterium	Curtobacterium sp. B18	26	68	0	0	0	47	4	5	12	10	16	11	151	334	90	36	9
Bacteria	Actinobacteria	Actinomycetia	Micrococcales	Microbacteriaceae	Curtobacterium	Curtobacterium sp. B8	0	5	0	0	4	12	3	0	0	0	0	0	9	0	1	1	1
Bacteria	Actinobacteria	Actinomycetia	Micrococcales	Microbacteriaceae	Curtobacterium	Curtobacterium sp. BH-2-1-1	0	0	0	21	1	0	4	0	0	19	0	0	58	45	70	25	0
Bacteria	Actinobacteria	Actinomycetia	Micrococcales	Microbacteriaceae	Curtobacterium	Curtobacterium sp. Csp1	0	0	0	61	0	0	0	0	0	0	0	38	84	161	25	1	1
Bacteria	Actinobacteria	Actinomycetia	Micrococcales	Microbacteriaceae	Curtobacterium	Curtobacterium sp. Csp2	0	0	0	0	0	0	0	17	0	1	0	0	0	1	0	1	0
Bacteria	Actinobacteria	Actinomycetia	Micrococcales	Microbacteriaceae	Curtobacterium	Curtobacterium sp. ER1/6	5	68	0	1	1	37	3	19	2	151	41	91	171	144	33	39	48
Bacteria	Actinobacteria	Actinomycetia	Micrococcales	Microbacteriaceae	Curtobacterium	Curtobacterium sp. HSID17257	1	17	0	0	11	9	0	11	0	19	29	47	73	0	49	2	17
Bacteria	Actinobacteria	Actinomycetia	Micrococcales	Microbacteriaceae	Curtobacterium	Curtobacterium sp. JUb34	0	18	4	0	0	11	18	23	1	2	0	0	40	21	46	37	41
Bacteria	Actinobacteria	Actinomycetia	Micrococcales	Microbacteriaceae	Curtobacterium	Curtobacterium sp. KBS0715	5	0	0	0	0	0	0	1	1	1	0	0	26	1	0	8	0
Bacteria	Actinobacteria	Actinomycetia	Micrococcales	Microbacteriaceae	Curtobacterium	Curtobacterium sp. Leaf183	1	0	0	0	0	1	0	0	0	18	0	0	9	131	61	21	0
Bacteria	Actinobacteria	Actinomycetia	Micrococcales	Microbacteriaceae	Curtobacterium	Curtobacterium sp. Leaf261	46	100	0	58	10	104	17	0	41	84	96	73	196	198	71	38	188
Bacteria	Actinobacteria	Actinomycetia	Micrococcales	Microbacteriaceae	Curtobacterium	Curtobacterium sp. MCBA15_001	0	11	0	24	53	24	16	9	1	168	32	46	31	82	39	33	55
Bacteria	Actinobacteria	Actinomycetia	Micrococcales	Microbacteriaceae	Curtobacterium	Curtobacterium sp. MCBA15_008	0	20	1	48	70	107	11	30	0	50	1	19	137	49	63	17	2
Bacteria	Actinobacteria	Actinomycetia	Micrococcales	Microbacteriaceae	Curtobacterium	Curtobacterium sp. MCBA15_012	0	0	0	0	1	24	25	4	0	0	7	0	20	0	0	1	2
Bacteria	Actinobacteria	Actinomycetia	Micrococcales	Microbacteriaceae	Curtobacterium	Curtobacterium sp. MCBA15_013	0	3	0	0	0	0	0	1	0	2	0	0	0	3	0	6	0
Bacteria	Actinobacteria	Actinomycetia	Micrococcales	Microbacteriaceae	Curtobacterium	Curtobacterium sp. MCBA15_016	0	19	0	0	1	0	0	0	0	0	0	0	0	1	0	12	0
Bacteria	Actinobacteria	Actinomycetia	Micrococcales	Microbacteriaceae	Curtobacterium	Curtobacterium sp. MCBD17_008	14	63	0	0	3	23	4	27	0	20	18	0	69	20	12	4	0
Bacteria	Actinobacteria	Actinomycetia	Micrococcales	Microbacteriaceae	Curtobacterium	Curtobacterium sp. MCBD17_019	0	0	0	0	0	0	0	0	1	6	0	0	46	118	1	6	0
Bacteria	Actinobacteria	Actinomycetia	Micrococcales	Microbacteriaceae	Curtobacterium	Curtobacterium sp. MCBD17_028	0	8	0	23	0	0	0	0	0	0	0	35	8	0	27	8	0
Bacteria	Actinobacteria	Actinomycetia	Micrococcales	Microbacteriaceae	Curtobacterium	Curtobacterium sp. MCBD17_029	7	10	0	0	4	0	0	0	0	21	0	0	22	0	0	16	0
Bacteria	Actinobacteria	Actinomycetia	Micrococcales	Microbacteriaceae	Curtobacterium	Curtobacterium sp. MCBD17_032	9	0	1	0	1	33	6	0	0	42	17	0	37	86	29	10	25
Bacteria	Actinobacteria	Actinomycetia	Micrococcales	Microbacteriaceae	Curtobacterium	Curtobacterium sp. MCLR17_007	0	0	0	0	0	11	7	0	0	15	0	0	6	60	0	1	0
Bacteria	Actinobacteria	Actinomycetia	Micrococcales	Microbacteriaceae	Curtobacterium	Curtobacterium sp. MCLR17_032	0	25	0	20	0	23	31	1	23	11	37	0	54	39	24	15	98
Bacteria	Actinobacteria	Actinomycetia	Micrococcales	Microbacteriaceae	Curtobacterium	Curtobacterium sp. MCLR17_036	1	24	0	0	0	40	0	1	19	31	6	2	20	1	1	10	1
Bacteria	Actinobacteria	Actinomycetia	Micrococcales	Microbacteriaceae	Curtobacterium	Curtobacterium sp. MCLR17_044	2	13	1	16	11	35	12	16	31	56	20	4	15	4	22	17	7
Bacteria	Actinobacteria	Actinomycetia	Micrococcales	Microbacteriaceae	Curtobacterium	Curtobacterium sp. MCLR17_045	0	9	0	1	12	0	5	0	38	9	0	0	0	1	0	10	55
Bacteria	Actinobacteria	Actinomycetia	Micrococcales	Microbacteriaceae	Curtobacterium	Curtobacterium sp. MCPF17_001	0	0	0	0	0	0	13	0	0	9	0	0	3	43	0	29	0
Bacteria	Actinobacteria	Actinomycetia	Micrococcales	Microbacteriaceae	Curtobacterium	Curtobacterium sp. MCPF17_002	5	19	1	20	0	37	0	0	33	44	25	39	62	41	1	16	0
Bacteria	Actinobacteria	Actinomycetia	Micrococcales	Microbacteriaceae	Curtobacterium	Curtobacterium sp. MCPF17_018	0	0	0	0	1	14	6	0	0	0	2	35	0	0	0	3	20
Bacteria	Actinobacteria	Actinomycetia	Micrococcales	Microbacteriaceae	Curtobacterium	Curtobacterium sp. MCPF17_021	0	0	0	1	0	0	0	0	0	33	0	0	13	0	0	4	0
Bacteria	Actinobacteria	Actinomycetia	Micrococcales	Microbacteriaceae	Curtobacterium	Curtobacterium sp. MCPF17_031	0	0	1	0	0	0	0	0	0	9	0	0	0	1	0	7	16
Bacteria	Actinobacteria	Actinomycetia	Micrococcales	Microbacteriaceae	Curtobacterium	Curtobacterium sp. MCPF17_047	39	0	0	0	0	0	2	0	0	13	0	19	0	4	0	5	0
Bacteria	Actinobacteria	Actinomycetia	Micrococcales	Microbacteriaceae	Curtobacterium	Curtobacterium sp. MCPF17_050	0	6	0	0	0	0	0	0	0	14	0	0	0	0	0	5	48
Bacteria	Actinobacteria	Actinomycetia	Micrococcales	Microbacteriaceae	Curtobacterium	Curtobacterium sp. MCPF17_052	9	18	0	0	16	1	0	0	28	30	0	0	4	18	32	9	2
Bacteria	Actinobacteria	Actinomycetia	Micrococcales	Microbacteriaceae	Curtobacterium	Curtobacterium sp. MCSS17_005	31	23	38	0	14	0	178	219	0	0	0	0	9	0	0	8	0
Bacteria	Actinobacteria	Actinomycetia	Micrococcales	Microbacteriaceae	Curtobacterium	Curtobacterium sp. MCSS17_007	0	35	0	1	1	13	1	2	0	12	20	0	9	12	37	12	15
Bacteria	Actinobacteria	Actinomycetia	Micrococcales	Microbacteriaceae	Curtobacterium	Curtobacterium sp. MCSS17_008	33	27	1	48	39	0	0	0	1	25	23	3	72	3	22	9	50
Bacteria	Actinobacteria	Actinomycetia	Micrococcales	Microbacteriaceae	Curtobacterium	Curtobacterium sp. MCSS17_011	6	32	0	0	21	10	13	0	1	71	16	0	55	1	7	44	118
Bacteria	Actinobacteria	Actinomycetia	Micrococcales	Microbacteriaceae	Curtobacterium	Curtobacterium sp. MCSS17_015	21	2	0	0	0	27	0	0	15	11	0	0	12	46	1	11	0
Bacteria	Actinobacteria	Actinomycetia	Micrococcales	Microbacteriaceae	Curtobacterium	Curtobacterium sp. MCSS17_016	0	31	0	0	1	34	0	0	1	2	0	0	20	0	0	1	30
Bacteria	Actinobacteria	Actinomycetia	Micrococcales	Microbacteriaceae	Curtobacterium	Curtobacterium sp. ME26	0	14	0	32	7	0	1	4	0	47	0	1	53	6	17	41	16
Bacteria	Actinobacteria	Actinomycetia	Micrococcales	Microbacteriaceae	Curtobacterium	Curtobacterium sp. MMLR14_002	0	0	0	0	0	0	0	0	0	0	0	0	0	0	0	4	0
Bacteria	Actinobacteria	Actinomycetia	Micrococcales	Microbacteriaceae	Curtobacterium	Curtobacterium sp. MMLR14_010	0	19	0	0	0	15	9	18	1	18	3	28	35	29	29	12	70
Bacteria	Actinobacteria	Actinomycetia	Micrococcales	Microbacteriaceae	Curtobacterium	Curtobacterium sp. MR_MD2014	0	128	0	0	31	88	0	0	28	7	9	10	46	51	0	22	9
Bacteria	Actinobacteria	Actinomycetia	Micrococcales	Microbacteriaceae	Curtobacterium	Curtobacterium sp. PhB115	1	53	1	38	11	99	3	10	3	46	6	49	95	29	42	59	218
Bacteria	Actinobacteria	Actinomycetia	Micrococcales	Microbacteriaceae	Curtobacterium	Curtobacterium sp. PhB136	23	0	0	50	0	1	0	0	0	0	0	0	26	0	0	2	0
Bacteria	Actinobacteria	Actinomycetia	Micrococcales	Microbacteriaceae	Curtobacterium	Curtobacterium sp. S6	34	12	0	2	9	48	0	28	18	24	25	0	34	129	74	19	62
Bacteria	Actinobacteria	Actinomycetia	Micrococcales	Microbacteriaceae	Curtobacterium	Curtobacterium sp. SGAir0471	0	10	0	7	15	0	0	0	24	20	0	24	57	49	66	1	3
Bacteria	Actinobacteria	Actinomycetia	Micrococcales	Microbacteriaceae	Curtobacterium	Curtobacterium sp. UCD-KPL2560	9	13	0	75	11	0	0	0	0	13	13	5	59	3	1	21	27
Bacteria	Actinobacteria	Actinomycetia	Micrococcales	Microbacteriaceae	Curtobacterium	Curtobacterium sp. UNCCL17	0	9	0	46	23	42	17	0	13	9	3	0	10	83	0	9	52
Bacteria	Actinobacteria	Actinomycetia	Micrococcales	Microbacteriaceae	Curtobacterium	Curtobacterium sp. UNCCL20	13	0	4	11	2	30	6	2	0	22	4	1	39	54	2	2	59
Bacteria	Actinobacteria	Actinomycetia	Micrococcales	Microbacteriaceae	Curtobacterium	Curtobacterium sp. VKM Ac-1376	63	3	0	0	23	29	12	0	0	11	18	1	2	58	27	4	17
Bacteria	Actinobacteria	Actinomycetia	Micrococcales	Microbacteriaceae	Curtobacterium	Curtobacterium sp. VKM Ac-1393	0	0	0	0	0	326	5	6	0	7	1	0	17	163	1	32	35
Bacteria	Actinobacteria	Actinomycetia	Micrococcales	Microbacteriaceae	Curtobacterium	Curtobacterium sp. VKM Ac-1395	0	33	0	0	36	0	4	8	6	11	0	31	52	21	3	3	0
Bacteria	Actinobacteria	Actinomycetia	Micrococcales	Microbacteriaceae	Curtobacterium	Curtobacterium sp. VKM Ac-2852	0	11	0	0	0	47	0	0	0	22	25	0	57	14	35	4	15
Bacteria	Actinobacteria	Actinomycetia	Micrococcales	Microbacteriaceae	Curtobacterium	Curtobacterium sp. YC1	1	13	0	1	23	20	2	0	37	67	23	15	39	95	13	57	72
Bacteria	Actinobacteria	Actinomycetia	Micrococcales	Microbacteriaceae	Curtobacterium	Curtobacterium sp. YR515	0	17	0	14	0	0	0	0	2	40	0	0	43	0	41	4	22
Bacteria	Actinobacteria	Actinomycetia	Micrococcales	Microbacteriaceae	Microbacterium	Microbacterium aerolatum	105	313	4	115	31	84	44	50	181	394	132	116	464	115	176	89	164
Bacteria	Actinobacteria	Actinomycetia	Micrococcales	Microbacteriaceae	Microbacterium	Microbacterium album	2	63	3	19	30	31	0	23	28	85	31	5	367	343	7	31	2
Bacteria	Actinobacteria	Actinomycetia	Micrococcales	Microbacteriaceae	Microbacterium	Microbacterium algeriense	0	4	0	0	0	10	1	0	0	55	0	0	1	1	13	1	1
Bacteria	Actinobacteria	Actinomycetia	Micrococcales	Microbacteriaceae	Microbacterium	Microbacterium amylolyticum	56	21	1	18	0	19	0	2	2	90	6	17	37	54	10	30	115
Bacteria	Actinobacteria	Actinomycetia	Micrococcales	Microbacteriaceae	Microbacterium	Microbacterium aquimaris	20	40	0	20	47	34	15	24	0	66	34	23	12	66	80	13	81
Bacteria	Actinobacteria	Actinomycetia	Micrococcales	Microbacteriaceae	Microbacterium	Microbacterium arborescens	3300	7256	30	5757	2654	6179	2440	2878	4151	11373	2705	3874	10880	4507	7175	7895	8710
Bacteria	Actinobacteria	Actinomycetia	Micrococcales	Microbacteriaceae	Microbacterium	Microbacterium aurum	38	290	2	183	241	187	33	46	120	145	39	1	647	279	181	97	95
Bacteria	Actinobacteria	Actinomycetia	Micrococcales	Microbacteriaceae	Microbacterium	Microbacterium azadirachtae	48	54	2	20	48	56	7	14	31	47	58	42	257	311	24	31	205
Bacteria	Actinobacteria	Actinomycetia	Micrococcales	Microbacteriaceae	Microbacterium	Microbacterium barkeri	1	0	0	0	5	4	25	1	1	39	0	0	30	105	9	7	0
Bacteria	Actinobacteria	Actinomycetia	Micrococcales	Microbacteriaceae	Microbacterium	Microbacterium caowuchunii	9	99	0	56	104	63	6	3	71	124	8	1	88	257	125	48	47
Bacteria	Actinobacteria	Actinomycetia	Micrococcales	Microbacteriaceae	Microbacterium	Microbacterium chocolatum	0	29	3	0	14	71	0	28	0	27	36	2	63	65	84	28	68
Bacteria	Actinobacteria	Actinomycetia	Micrococcales	Microbacteriaceae	Microbacterium	Microbacterium enclense	16	46	17	99	33	246	24	83	42	85	105	43	218	253	29	50	203
Bacteria	Actinobacteria	Actinomycetia	Micrococcales	Microbacteriaceae	Microbacterium	Microbacterium endophyticum	33	4	0	0	1	47	1	0	0	148	37	1	64	22	66	2	94
Bacteria	Actinobacteria	Actinomycetia	Micrococcales	Microbacteriaceae	Microbacterium	Microbacterium esteraromaticum	627	1292	4	761	618	1087	400	481	668	2024	503	708	2018	1126	1556	1200	1444
Bacteria	Actinobacteria	Actinomycetia	Micrococcales	Microbacteriaceae	Microbacterium	Microbacterium excoecariae	11	8	6	0	54	30	0	14	0	17	1	25	92	81	123	2	43
Bacteria	Actinobacteria	Actinomycetia	Micrococcales	Microbacteriaceae	Microbacterium	Microbacterium faecale	9	27	0	9	0	535	1	1	33	23	25	11	196	316	54	12	30
Bacteria	Actinobacteria	Actinomycetia	Micrococcales	Microbacteriaceae	Microbacterium	Microbacterium foliorum	18	80	1	30	1	18	12	29	17	92	79	0	169	105	0	9	34
Bacteria	Actinobacteria	Actinomycetia	Micrococcales	Microbacteriaceae	Microbacterium	Microbacterium ginsengisoli	18	27	0	1418	1537	23	11	3	0	2	3	0	1827	4454	3	14	36
Bacteria	Actinobacteria	Actinomycetia	Micrococcales	Microbacteriaceae	Microbacterium	Microbacterium ginsengiterrae	12	126	0	2	98	56	7	17	16	84	56	111	396	675	96	30	248
Bacteria	Actinobacteria	Actinomycetia	Micrococcales	Microbacteriaceae	Microbacterium	Microbacterium gorillae	14	67	34	67	37	114	85	84	3	64	8	8	389	436	42	46	19
Bacteria	Actinobacteria	Actinomycetia	Micrococcales	Microbacteriaceae	Microbacterium	Microbacterium gubbeenense	43	35	1	13	38	24	14	63	0	38	43	0	50	60	39	27	60
Bacteria	Actinobacteria	Actinomycetia	Micrococcales	Microbacteriaceae	Microbacterium	Microbacterium halimionae	0	21	0	0	0	19	0	5	1	69	4	28	7	50	49	11	94
Bacteria	Actinobacteria	Actinomycetia	Micrococcales	Microbacteriaceae	Microbacterium	Microbacterium halophytorum	0	176	0	0	32	53	25	57	34	140	12	3	318	138	86	75	240
Bacteria	Actinobacteria	Actinomycetia	Micrococcales	Microbacteriaceae	Microbacterium	Microbacterium halotolerans	0	11	4	43	42	41	12	6	5	66	36	54	143	54	13	12	158
Bacteria	Actinobacteria	Actinomycetia	Micrococcales	Microbacteriaceae	Microbacterium	Microbacterium hatanonis	15	208	0	37	19	103	14	2	22	389	21	26	345	188	77	23	143
Bacteria	Actinobacteria	Actinomycetia	Micrococcales	Microbacteriaceae	Microbacterium	Microbacterium hibisci	86	55	1	20	44	50	15	9	0	64	29	7	146	227	57	10	81
Bacteria	Actinobacteria	Actinomycetia	Micrococcales	Microbacteriaceae	Microbacterium	Microbacterium hominis	94	229	1	125	40	157	34	67	104	239	125	215	295	382	136	69	143
Bacteria	Actinobacteria	Actinomycetia	Micrococcales	Microbacteriaceae	Microbacterium	Microbacterium humi	26	58	22	0	0	48	138	58	17	174	140	69	190	28	38	35	102
Bacteria	Actinobacteria	Actinomycetia	Micrococcales	Microbacteriaceae	Microbacterium	Microbacterium hydrocarbonoxydans	2	125	0	2	98	163	36	27	97	160	38	95	200	120	46	83	157
Bacteria	Actinobacteria	Actinomycetia	Micrococcales	Microbacteriaceae	Microbacterium	Microbacterium hydrothermale	0	37	0	0	0	1	0	4	0	8	51	0	44	9	51	28	90
Bacteria	Actinobacteria	Actinomycetia	Micrococcales	Microbacteriaceae	Microbacterium	Microbacterium immunditiarum	4	96	1	104	13	173	2	76	52	85	38	32	308	164	10	38	210
Bacteria	Actinobacteria	Actinomycetia	Micrococcales	Microbacteriaceae	Microbacterium	Microbacterium indicum	45	7	0	19	63	180	10	0	0	2	96	28	101	426	81	2	14
Bacteria	Actinobacteria	Actinomycetia	Micrococcales	Microbacteriaceae	Microbacterium	Microbacterium karelineae	15	30	1	6	3	55	1	19	1	68	33	20	72	85	31	11	110
Bacteria	Actinobacteria	Actinomycetia	Micrococcales	Microbacteriaceae	Microbacterium	Microbacterium ketosireducens	30	56	1	19	12	340	16	0	101	110	50	6	145	181	29	14	126
Bacteria	Actinobacteria	Actinomycetia	Micrococcales	Microbacteriaceae	Microbacterium	Microbacterium kitamiense	26	67	0	63	27	34	20	2	19	95	27	52	151	56	54	85	1
Bacteria	Actinobacteria	Actinomycetia	Micrococcales	Microbacteriaceae	Microbacterium	Microbacterium kyungheense	19	50	0	0	31	53	5	1	0	48	50	0	104	506	75	25	25
Bacteria	Actinobacteria	Actinomycetia	Micrococcales	Microbacteriaceae	Microbacterium	Microbacterium lacticum	34	203	1	628	401	142	19	77	89	244	144	78	840	1462	114	55	257
Bacteria	Actinobacteria	Actinomycetia	Micrococcales	Microbacteriaceae	Microbacterium	Microbacterium lacus	0	9	0	0	16	35	8	1	0	11	0	0	2	0	13	8	19
Bacteria	Actinobacteria	Actinomycetia	Micrococcales	Microbacteriaceae	Microbacterium	Microbacterium laevaniformans	132	94	2	164	75	369	41	49	135	236	107	73	251	137	91	189	260
Bacteria	Actinobacteria	Actinomycetia	Micrococcales	Microbacteriaceae	Microbacterium	Microbacterium lemovicicum	31	59	0	84	0	171	23	20	45	175	114	46	152	623	129	60	133
Bacteria	Actinobacteria	Actinomycetia	Micrococcales	Microbacteriaceae	Microbacterium	Microbacterium lindanitolerans	7	1	2	15	34	0	0	9	10	17	0	0	52	116	0	1	0
Bacteria	Actinobacteria	Actinomycetia	Micrococcales	Microbacteriaceae	Microbacterium	Microbacterium liquefaciens	0	14	0	37	41	1	6	7	6	52	200	0	41	1	0	10	21
Bacteria	Actinobacteria	Actinomycetia	Micrococcales	Microbacteriaceae	Microbacterium	Microbacterium lushaniae	598	352	1046	195	785	148	9	17	70	151	78	47	222	481	68	74	189
Bacteria	Actinobacteria	Actinomycetia	Micrococcales	Microbacteriaceae	Microbacterium	Microbacterium luticocti	0	35	2	2	46	149	14	5	20	60	59	38	215	221	24	9	29
Bacteria	Actinobacteria	Actinomycetia	Micrococcales	Microbacteriaceae	Microbacterium	Microbacterium mangrovi	112	304	1	292	61	301	67	93	133	274	336	351	727	492	267	296	363
Bacteria	Actinobacteria	Actinomycetia	Micrococcales	Microbacteriaceae	Microbacterium	Microbacterium marinum	105	68	1	95	9	199	24	1	0	160	61	107	313	316	28	31	2
Bacteria	Actinobacteria	Actinomycetia	Micrococcales	Microbacteriaceae	Microbacterium	Microbacterium mitrae	1	34	1	18	10	168	5	26	0	48	3	43	36	57	19	10	43
Bacteria	Actinobacteria	Actinomycetia	Micrococcales	Microbacteriaceae	Microbacterium	Microbacterium murale	11	149	0	13	1	144	25	12	3	180	113	0	97	80	26	33	34
Bacteria	Actinobacteria	Actinomycetia	Micrococcales	Microbacteriaceae	Microbacterium	Microbacterium nanhaiense	31	137	0	56	63	174	28	79	160	62	112	95	293	78	84	110	192
Bacteria	Actinobacteria	Actinomycetia	Micrococcales	Microbacteriaceae	Microbacterium	Microbacterium oleivorans	52	315	18	110	156	972	71	27	25	245	93	25	578	618	182	127	415
Bacteria	Actinobacteria	Actinomycetia	Micrococcales	Microbacteriaceae	Microbacterium	Microbacterium oryzae	17	126	1	0	5	39	13	8	18	422	12	19	145	248	31	39	128
Bacteria	Actinobacteria	Actinomycetia	Micrococcales	Microbacteriaceae	Microbacterium	Microbacterium oxydans	109	171	2	97	100	111	67	58	90	452	168	109	537	221	204	65	114
Bacteria	Actinobacteria	Actinomycetia	Micrococcales	Microbacteriaceae	Microbacterium	Microbacterium paludicola	141	139	51	34	4	176	161	138	32	94	49	68	215	119	27	61	13
Bacteria	Actinobacteria	Actinomycetia	Micrococcales	Microbacteriaceae	Microbacterium	Microbacterium paraoxydans	26	220	0	149	88	93	39	3	33	293	88	17	399	47	94	41	50
Bacteria	Actinobacteria	Actinomycetia	Micrococcales	Microbacteriaceae	Microbacterium	Microbacterium phyllosphaerae	0	0	0	0	14	0	0	0	0	25	20	2	23	2	0	4	0
Bacteria	Actinobacteria	Actinomycetia	Micrococcales	Microbacteriaceae	Microbacterium	Microbacterium profundi	13	44	0	2	8	83	0	2	0	82	22	52	65	160	131	35	49
Bacteria	Actinobacteria	Actinomycetia	Micrococcales	Microbacteriaceae	Microbacterium	Microbacterium protaetiae	3	76	3	64	41	68	4	22	88	118	16	83	150	228	54	48	106
Bacteria	Actinobacteria	Actinomycetia	Micrococcales	Microbacteriaceae	Microbacterium	Microbacterium proteolyticum	13	5	1	3	19	153	1	1	64	23	43	0	110	571	3	15	121
Bacteria	Actinobacteria	Actinomycetia	Micrococcales	Microbacteriaceae	Microbacterium	Microbacterium pseudoresistens	0	39	0	22	9	86	2	13	30	62	50	40	171	82	78	6	15
Bacteria	Actinobacteria	Actinomycetia	Micrococcales	Microbacteriaceae	Microbacterium	Microbacterium pumilum	2	57	2	43	21	69	23	6	1	107	32	47	52	206	38	11	23
Bacteria	Actinobacteria	Actinomycetia	Micrococcales	Microbacteriaceae	Microbacterium	Microbacterium pygmaeum	43	206	2	118	65	308	34	34	66	691	99	49	345	351	163	89	422
Bacteria	Actinobacteria	Actinomycetia	Micrococcales	Microbacteriaceae	Microbacterium	Microbacterium radiodurans	285	128	241	1	106	444	629	627	15	66	32	24	171	475	2	46	89
Bacteria	Actinobacteria	Actinomycetia	Micrococcales	Microbacteriaceae	Microbacterium	Microbacterium resistens	15	56	1	44	32	77	5	13	26	114	32	5	124	118	7	5	131
Bacteria	Actinobacteria	Actinomycetia	Micrococcales	Microbacteriaceae	Microbacterium	Microbacterium rhizomatis	6	135	2	115	27	355	8	43	6	218	78	33	406	743	79	51	51
Bacteria	Actinobacteria	Actinomycetia	Micrococcales	Microbacteriaceae	Microbacterium	Microbacterium saperdae	31496	68992	143	47693	23086	53363	21761	26852	38519	113981	34201	39281	92895	42787	66273	68636	73037
Bacteria	Actinobacteria	Actinomycetia	Micrococcales	Microbacteriaceae	Microbacterium	Microbacterium schleiferi	0	28	0	35	17	176	15	20	0	77	19	64	27	130	16	63	208
Bacteria	Actinobacteria	Actinomycetia	Micrococcales	Microbacteriaceae	Microbacterium	Microbacterium sediminis	68	115	2	50	0	383	25	40	65	111	114	29	1285	129	120	35	336
Bacteria	Actinobacteria	Actinomycetia	Micrococcales	Microbacteriaceae	Microbacterium	Microbacterium sorbitolivorans	4	71	1	42	26	61	28	19	12	190	41	4	170	89	44	92	78
Bacteria	Actinobacteria	Actinomycetia	Micrococcales	Microbacteriaceae	Microbacterium	Microbacterium sp. 1.5R	0	20	0	1	10	33	4	8	0	62	10	0	107	60	106	14	105
Bacteria	Actinobacteria	Actinomycetia	Micrococcales	Microbacteriaceae	Microbacterium	Microbacterium sp. 10M-3C3	48	47	0	23	12	44	23	7	1	35	47	1	77	193	45	39	21
Bacteria	Actinobacteria	Actinomycetia	Micrococcales	Microbacteriaceae	Microbacterium	Microbacterium sp. 13-71-7	0	29	0	0	1	5	1	14	1	2	0	1	14	19	2	2	0
Bacteria	Actinobacteria	Actinomycetia	Micrococcales	Microbacteriaceae	Microbacterium	Microbacterium sp. 14-71-5	41	42	0	14	14	80	2	23	0	105	36	26	65	89	80	35	301
Bacteria	Actinobacteria	Actinomycetia	Micrococcales	Microbacteriaceae	Microbacterium	Microbacterium sp. 18062	235	635	1	427	224	531	193	161	317	1080	325	369	929	534	447	664	477
Bacteria	Actinobacteria	Actinomycetia	Micrococcales	Microbacteriaceae	Microbacterium	Microbacterium sp. 292MF	20	30	0	42	8	1	1	9	62	53	23	1	92	86	38	21	2
Bacteria	Actinobacteria	Actinomycetia	Micrococcales	Microbacteriaceae	Microbacterium	Microbacterium sp. 2C	55	456	0	398	256	50	74	15	88	662	336	68	663	639	256	83	117
Bacteria	Actinobacteria	Actinomycetia	Micrococcales	Microbacteriaceae	Microbacterium	Microbacterium sp. 2FI	50	110	1	104	33	89	7	42	30	218	120	79	217	157	170	24	256
Bacteria	Actinobacteria	Actinomycetia	Micrococcales	Microbacteriaceae	Microbacterium	Microbacterium sp. 3290	34	340	0	70	98	158	21	38	52	592	175	37	456	275	115	90	72
Bacteria	Actinobacteria	Actinomycetia	Micrococcales	Microbacteriaceae	Microbacterium	Microbacterium sp. 3H14	0	10	0	0	21	0	0	7	0	15	9	0	52	17	0	1	37
Bacteria	Actinobacteria	Actinomycetia	Micrococcales	Microbacteriaceae	Microbacterium	Microbacterium sp. 3J1	0	46	0	10	1	67	0	8	0	30	23	18	17	34	1	9	1
Bacteria	Actinobacteria	Actinomycetia	Micrococcales	Microbacteriaceae	Microbacterium	Microbacterium sp. 4NA327F11	0	1	0	890	712	19	1	14	1	0	1	0	982	2812	2	1	0
Bacteria	Actinobacteria	Actinomycetia	Micrococcales	Microbacteriaceae	Microbacterium	Microbacterium sp. 4R-513	55	126	0	86	19	114	24	1	71	394	142	2	119	233	92	101	149
Bacteria	Actinobacteria	Actinomycetia	Micrococcales	Microbacteriaceae	Microbacterium	Microbacterium sp. 5K110	118	125	0	198	37	394	37	145	109	256	126	180	257	255	193	102	112
Bacteria	Actinobacteria	Actinomycetia	Micrococcales	Microbacteriaceae	Microbacterium	Microbacterium sp. 67-17	39	45	2	28	5	354	47	30	54	56	58	73	86	148	1	53	192
Bacteria	Actinobacteria	Actinomycetia	Micrococcales	Microbacteriaceae	Microbacterium	Microbacterium sp. 69-10	34	49	1	0	0	38	11	0	3	116	2	0	127	110	42	14	1
Bacteria	Actinobacteria	Actinomycetia	Micrococcales	Microbacteriaceae	Microbacterium	Microbacterium sp. 69-7	0	7	0	35	1	94	12	10	0	0	0	0	0	74	0	21	72
Bacteria	Actinobacteria	Actinomycetia	Micrococcales	Microbacteriaceae	Microbacterium	Microbacterium sp. 70-16	19	0	0	0	5	18	13	0	0	0	9	0	9	0	19	1	0
Bacteria	Actinobacteria	Actinomycetia	Micrococcales	Microbacteriaceae	Microbacterium	Microbacterium sp. 70-38	22	157	0	5	7	86	26	0	17	211	97	0	380	455	4	27	115
Bacteria	Actinobacteria	Actinomycetia	Micrococcales	Microbacteriaceae	Microbacterium	Microbacterium sp. 8M	58	98	2	24	95	87	8	12	5	124	46	96	218	124	127	42	169
Bacteria	Actinobacteria	Actinomycetia	Micrococcales	Microbacteriaceae	Microbacterium	Microbacterium sp. A18JL200	1	135	0	48	80	86	6	33	29	69	60	33	170	175	42	57	132
Bacteria	Actinobacteria	Actinomycetia	Micrococcales	Microbacteriaceae	Microbacterium	Microbacterium sp. A18JL241	0	82	0	28	9	83	10	12	61	221	22	15	169	252	29	38	0
Bacteria	Actinobacteria	Actinomycetia	Micrococcales	Microbacteriaceae	Microbacterium	Microbacterium sp. ABRD_28	0	26	1	24	63	87	5	0	79	93	8	76	29	78	32	12	1
Bacteria	Actinobacteria	Actinomycetia	Micrococcales	Microbacteriaceae	Microbacterium	Microbacterium sp. AG1240	1	32	0	49	0	17	0	15	0	49	29	1	79	45	1	4	0
Bacteria	Actinobacteria	Actinomycetia	Micrococcales	Microbacteriaceae	Microbacterium	Microbacterium sp. AG238	0	16	1	45	0	13	9	1	48	133	22	0	36	30	29	25	0
Bacteria	Actinobacteria	Actinomycetia	Micrococcales	Microbacteriaceae	Microbacterium	Microbacterium sp. AG790	0	33	2	1	35	111	13	21	34	79	0	12	57	51	27	6	92
Bacteria	Actinobacteria	Actinomycetia	Micrococcales	Microbacteriaceae	Microbacterium	Microbacterium sp. AISO3	13	78	1	27	20	1	7	27	24	96	13	14	110	1	53	6	30
Bacteria	Actinobacteria	Actinomycetia	Micrococcales	Microbacteriaceae	Microbacterium	Microbacterium sp. AK009	68	74	2	23	6	66	31	21	8	171	24	0	145	74	0	56	170
Bacteria	Actinobacteria	Actinomycetia	Micrococcales	Microbacteriaceae	Microbacterium	Microbacterium sp. ANT_H45B	216	307	3	237	185	214	115	139	221	523	114	215	421	289	347	356	499
Bacteria	Actinobacteria	Actinomycetia	Micrococcales	Microbacteriaceae	Microbacterium	Microbacterium sp. AR7-10	10	18	0	0	0	7	19	0	16	0	24	0	38	54	0	31	1
Bacteria	Actinobacteria	Actinomycetia	Micrococcales	Microbacteriaceae	Microbacterium	Microbacterium sp. B19	19	48	0	3	23	20	20	9	30	37	32	8	30	101	19	23	64
Bacteria	Actinobacteria	Actinomycetia	Micrococcales	Microbacteriaceae	Microbacterium	Microbacterium sp. B24	23	8	0	0	0	0	1	6	0	7	0	0	24	67	11	3	2
Bacteria	Actinobacteria	Actinomycetia	Micrococcales	Microbacteriaceae	Microbacterium	Microbacterium sp. B35-04	0	26	0	0	0	0	0	0	23	71	0	0	1	2	11	9	13
Bacteria	Actinobacteria	Actinomycetia	Micrococcales	Microbacteriaceae	Microbacterium	Microbacterium sp. B8U3A	12	40	1	1	292	226	0	1	13	159	70	21	159	381	10	50	98
Bacteria	Actinobacteria	Actinomycetia	Micrococcales	Microbacteriaceae	Microbacterium	Microbacterium sp. BH-3-3-3	7	86	1	2	75	58	3	2	7	1	43	0	64	45	23	25	32
Bacteria	Actinobacteria	Actinomycetia	Micrococcales	Microbacteriaceae	Microbacterium	Microbacterium sp. BK664	43	64	1	55	10	84	24	32	8	58	33	0	94	124	52	30	37
Bacteria	Actinobacteria	Actinomycetia	Micrococcales	Microbacteriaceae	Microbacterium	Microbacterium sp. BK668	93	80	2	79	14	97	30	30	0	217	61	2	223	94	60	80	111
Bacteria	Actinobacteria	Actinomycetia	Micrococcales	Microbacteriaceae	Microbacterium	Microbacterium sp. C448	2	39	1	38	60	10	0	0	22	140	21	0	37	169	1	14	3
Bacteria	Actinobacteria	Actinomycetia	Micrococcales	Microbacteriaceae	Microbacterium	Microbacterium sp. CCH5-D1	0	12	0	31	0	44	3	12	0	17	33	0	39	27	0	4	41
Bacteria	Actinobacteria	Actinomycetia	Micrococcales	Microbacteriaceae	Microbacterium	Microbacterium sp. cf046	120	491	3	109	137	423	115	123	322	1768	209	280	451	754	161	258	491
Bacteria	Actinobacteria	Actinomycetia	Micrococcales	Microbacteriaceae	Microbacterium	Microbacterium sp. cf332	0	11	0	54	21	1	10	2	24	62	39	27	46	100	100	8	6
Bacteria	Actinobacteria	Actinomycetia	Micrococcales	Microbacteriaceae	Microbacterium	Microbacterium sp. CF335	61	33	0	1	43	349	11	21	4	74	20	76	170	259	58	32	13
Bacteria	Actinobacteria	Actinomycetia	Micrococcales	Microbacteriaceae	Microbacterium	Microbacterium sp. CFBP 13617	0	0	0	0	0	0	0	1	0	0	0	0	0	84	0	2	15
Bacteria	Actinobacteria	Actinomycetia	Micrococcales	Microbacteriaceae	Microbacterium	Microbacterium sp. CFH 90308	32	88	2	39	44	357	10	17	12	149	74	3	284	536	139	36	101
Bacteria	Actinobacteria	Actinomycetia	Micrococcales	Microbacteriaceae	Microbacterium	Microbacterium sp. CGR1	0	13	0	18	0	15	2	0	1	1	29	0	0	12	0	8	0
Bacteria	Actinobacteria	Actinomycetia	Micrococcales	Microbacteriaceae	Microbacterium	Microbacterium sp. CGR2	0	43	2	29	0	29	2	39	0	98	67	2	184	288	10	40	12
Bacteria	Actinobacteria	Actinomycetia	Micrococcales	Microbacteriaceae	Microbacterium	Microbacterium sp. CH12i	0	21	2	71	6	87	7	3	2	96	11	29	137	387	17	18	30
Bacteria	Actinobacteria	Actinomycetia	Micrococcales	Microbacteriaceae	Microbacterium	Microbacterium sp. CJ77	5	10	0	0	0	14	8	1	11	10	13	0	10	59	69	6	0
Bacteria	Actinobacteria	Actinomycetia	Micrococcales	Microbacteriaceae	Microbacterium	Microbacterium sp. CPCC 204701	2	44	0	14	30	54	1	1	2	130	24	0	64	129	17	7	152
Bacteria	Actinobacteria	Actinomycetia	Micrococcales	Microbacteriaceae	Microbacterium	Microbacterium sp. CSI-V	0	6	0	0	0	9	6	16	0	18	1	0	17	0	0	1	1
Bacteria	Actinobacteria	Actinomycetia	Micrococcales	Microbacteriaceae	Microbacterium	Microbacterium sp. dk485	1	6	1	0	0	0	0	0	31	23	0	1	33	49	0	8	0
Bacteria	Actinobacteria	Actinomycetia	Micrococcales	Microbacteriaceae	Microbacterium	Microbacterium sp. GCS4	35	48	0	8	7	9	5	12	0	62	53	7	65	71	84	25	112
Bacteria	Actinobacteria	Actinomycetia	Micrococcales	Microbacteriaceae	Microbacterium	Microbacterium sp. Gd 4-13	8	51	0	0	1	136	12	9	0	7	40	34	87	56	3	15	100
Bacteria	Actinobacteria	Actinomycetia	Micrococcales	Microbacteriaceae	Microbacterium	Microbacterium sp. H83	27	53	0	96	0	16	1	8	0	58	80	0	51	25	1	29	77
Bacteria	Actinobacteria	Actinomycetia	Micrococcales	Microbacteriaceae	Microbacterium	Microbacterium sp. HMWF026	0	11	0	34	0	0	17	0	0	54	19	0	63	2	0	15	77
Bacteria	Actinobacteria	Actinomycetia	Micrococcales	Microbacteriaceae	Microbacterium	Microbacterium sp. HSID17254	0	5	0	1	38	9	10	9	2	64	20	10	75	1	26	4	0
Bacteria	Actinobacteria	Actinomycetia	Micrococcales	Microbacteriaceae	Microbacterium	Microbacterium sp. HY54	0	0	1	0	0	0	0	0	0	6	0	0	24	38	9	5	0
Bacteria	Actinobacteria	Actinomycetia	Micrococcales	Microbacteriaceae	Microbacterium	Microbacterium sp. HY82	0	10	0	0	0	0	0	0	0	20	6	0	10	85	0	10	0
Bacteria	Actinobacteria	Actinomycetia	Micrococcales	Microbacteriaceae	Microbacterium	Microbacterium sp. HY89	0	15	0	8	0	19	0	0	29	12	7	45	16	2	0	4	0
Bacteria	Actinobacteria	Actinomycetia	Micrococcales	Microbacteriaceae	Microbacterium	Microbacterium sp. JB110	0	23	0	0	0	0	0	1	0	0	0	4	0	1	0	23	0
Bacteria	Actinobacteria	Actinomycetia	Micrococcales	Microbacteriaceae	Microbacterium	Microbacterium sp. JZ31	18	31	2	82	1	26	38	6	0	49	113	2	165	32	108	43	131
Bacteria	Actinobacteria	Actinomycetia	Micrococcales	Microbacteriaceae	Microbacterium	Microbacterium sp. K24	6	67	8	2	15	9	45	3	65	122	41	2	105	162	41	30	46
Bacteria	Actinobacteria	Actinomycetia	Micrococcales	Microbacteriaceae	Microbacterium	Microbacterium sp. K35	0	2	0	16	0	0	0	0	0	0	0	0	32	24	0	3	0
Bacteria	Actinobacteria	Actinomycetia	Micrococcales	Microbacteriaceae	Microbacterium	Microbacterium sp. KROCY2	146	364	0	287	112	232	105	79	209	877	203	377	435	261	375	131	337
Bacteria	Actinobacteria	Actinomycetia	Micrococcales	Microbacteriaceae	Microbacterium	Microbacterium sp. LAM7116	17	148	1	22	10	243	2	23	24	231	69	1	215	315	33	41	137
Bacteria	Actinobacteria	Actinomycetia	Micrococcales	Microbacteriaceae	Microbacterium	Microbacterium sp. LCT-H2	11	76	0	37	13	98	11	14	4	38	57	23	132	40	27	27	17
Bacteria	Actinobacteria	Actinomycetia	Micrococcales	Microbacteriaceae	Microbacterium	Microbacterium sp. Leaf151	17	76	0	25	25	38	8	0	3	45	10	38	52	73	9	11	72
Bacteria	Actinobacteria	Actinomycetia	Micrococcales	Microbacteriaceae	Microbacterium	Microbacterium sp. Leaf159	0	18	0	0	0	12	5	0	0	49	0	0	29	0	3	9	0
Bacteria	Actinobacteria	Actinomycetia	Micrococcales	Microbacteriaceae	Microbacterium	Microbacterium sp. Leaf203	0	6	0	0	0	4	1	4	1	0	8	0	2	48	0	4	36
Bacteria	Actinobacteria	Actinomycetia	Micrococcales	Microbacteriaceae	Microbacterium	Microbacterium sp. Leaf288	8	90	0	10	9	81	1	23	58	142	13	1	259	518	30	38	24
Bacteria	Actinobacteria	Actinomycetia	Micrococcales	Microbacteriaceae	Microbacterium	Microbacterium sp. Leaf320	1	45	0	36	0	91	18	13	0	26	46	1	36	58	73	40	5
Bacteria	Actinobacteria	Actinomycetia	Micrococcales	Microbacteriaceae	Microbacterium	Microbacterium sp. LKL04	0	5	0	0	0	11	0	0	25	23	20	1	0	55	0	23	1
Bacteria	Actinobacteria	Actinomycetia	Micrococcales	Microbacteriaceae	Microbacterium	Microbacterium sp. MAH-37	0	17	0	0	22	15	0	1	11	107	3	0	88	197	0	14	126
Bacteria	Actinobacteria	Actinomycetia	Micrococcales	Microbacteriaceae	Microbacterium	Microbacterium sp. Marseille-Q2854	12	94	0	22	38	26	15	12	35	84	25	32	71	59	3	19	15
Bacteria	Actinobacteria	Actinomycetia	Micrococcales	Microbacteriaceae	Microbacterium	Microbacterium sp. MEJ108Y	2	2	0	0	0	8	1	0	0	0	12	0	1	53	0	1	0
Bacteria	Actinobacteria	Actinomycetia	Micrococcales	Microbacteriaceae	Microbacterium	Microbacterium sp. MRS-1	0	70	0	59	19	86	3	33	16	42	19	32	125	51	1	41	105
Bacteria	Actinobacteria	Actinomycetia	Micrococcales	Microbacteriaceae	Microbacterium	Microbacterium sp. MYb62	0	20	0	0	0	31	11	35	16	104	3	60	93	52	65	19	41
Bacteria	Actinobacteria	Actinomycetia	Micrococcales	Microbacteriaceae	Microbacterium	Microbacterium sp. MYb64	16	18	0	28	1	21	0	30	15	13	0	0	26	122	16	9	31
Bacteria	Actinobacteria	Actinomycetia	Micrococcales	Microbacteriaceae	Microbacterium	Microbacterium sp. MYb66	0	20	1	21	0	14	0	8	0	56	1	18	28	63	31	15	5
Bacteria	Actinobacteria	Actinomycetia	Micrococcales	Microbacteriaceae	Microbacterium	Microbacterium sp. MYb72	10	63	1	28	1	79	42	8	34	76	14	11	60	36	54	40	66
Bacteria	Actinobacteria	Actinomycetia	Micrococcales	Microbacteriaceae	Microbacterium	Microbacterium sp. NEAU-LLC	0	47	2	44	51	128	9	11	40	57	31	7	187	56	64	39	24
Bacteria	Actinobacteria	Actinomycetia	Micrococcales	Microbacteriaceae	Microbacterium	Microbacterium sp. NEAU-LLE	0	4	0	1	14	1	12	31	50	98	0	48	20	4	92	31	37
Bacteria	Actinobacteria	Actinomycetia	Micrococcales	Microbacteriaceae	Microbacterium	Microbacterium sp. NFIX05	1	5	1	0	18	191	0	32	1	15	12	1	80	394	2	2	110
Bacteria	Actinobacteria	Actinomycetia	Micrococcales	Microbacteriaceae	Microbacterium	Microbacterium sp. No. 7	31	108	0	45	110	54	34	87	6	203	45	21	250	220	16	47	34
Bacteria	Actinobacteria	Actinomycetia	Micrococcales	Microbacteriaceae	Microbacterium	Microbacterium sp. Nx66	22	476	0	77	68	140	53	70	121	382	63	160	409	185	274	89	97
Bacteria	Actinobacteria	Actinomycetia	Micrococcales	Microbacteriaceae	Microbacterium	Microbacterium sp. NY27	3	142	1	19	0	17	9	0	33	104	26	22	147	355	128	39	16
Bacteria	Actinobacteria	Actinomycetia	Micrococcales	Microbacteriaceae	Microbacterium	Microbacterium sp. OAE522	0	6	0	0	1	26	18	22	0	49	5	0	54	23	0	6	28
Bacteria	Actinobacteria	Actinomycetia	Micrococcales	Microbacteriaceae	Microbacterium	Microbacterium sp. OAP127	24	61	3	3	66	64	4	22	13	161	112	60	109	170	31	24	60
Bacteria	Actinobacteria	Actinomycetia	Micrococcales	Microbacteriaceae	Microbacterium	Microbacterium sp. oral taxon 186	0	0	1	39	0	29	0	0	0	13	8	0	1	33	0	16	106
Bacteria	Actinobacteria	Actinomycetia	Micrococcales	Microbacteriaceae	Microbacterium	Microbacterium sp. PI-1	0	15	0	63	0	19	9	0	0	0	0	25	54	38	0	7	0
Bacteria	Actinobacteria	Actinomycetia	Micrococcales	Microbacteriaceae	Microbacterium	Microbacterium sp. PM5	24	10	1	0	3	1	0	16	0	1	28	0	2	13	72	9	0
Bacteria	Actinobacteria	Actinomycetia	Micrococcales	Microbacteriaceae	Microbacterium	Microbacterium sp. R1	0	0	0	0	0	0	0	1	0	7	0	0	0	20	0	2	0
Bacteria	Actinobacteria	Actinomycetia	Micrococcales	Microbacteriaceae	Microbacterium	Microbacterium sp. Re1	0	3	0	32	7	5	0	0	0	0	28	1	10	9	4	1	1
Bacteria	Actinobacteria	Actinomycetia	Micrococcales	Microbacteriaceae	Microbacterium	Microbacterium sp. RG1	0	72	0	0	79	136	9	17	11	26	31	55	167	303	30	34	100
Bacteria	Actinobacteria	Actinomycetia	Micrococcales	Microbacteriaceae	Microbacterium	Microbacterium sp. Root166	91	92	0	119	28	82	54	19	92	174	56	1	131	223	46	53	170
Bacteria	Actinobacteria	Actinomycetia	Micrococcales	Microbacteriaceae	Microbacterium	Microbacterium sp. Root180	15	86	2	80	7	38	21	6	57	154	32	0	289	211	26	38	156
Bacteria	Actinobacteria	Actinomycetia	Micrococcales	Microbacteriaceae	Microbacterium	Microbacterium sp. Root322	0	0	0	0	0	0	0	0	0	0	0	0	0	0	1	7	0
Bacteria	Actinobacteria	Actinomycetia	Micrococcales	Microbacteriaceae	Microbacterium	Microbacterium sp. Root53	0	0	0	0	0	0	0	0	0	0	1	0	41	4	0	8	0
Bacteria	Actinobacteria	Actinomycetia	Micrococcales	Microbacteriaceae	Microbacterium	Microbacterium sp. Root553	0	0	0	0	8	66	1	6	0	19	0	0	30	47	20	8	2
Bacteria	Actinobacteria	Actinomycetia	Micrococcales	Microbacteriaceae	Microbacterium	Microbacterium sp. Root61	15	111	0	80	54	256	19	28	61	154	29	41	203	490	127	39	134
Bacteria	Actinobacteria	Actinomycetia	Micrococcales	Microbacteriaceae	Microbacterium	Microbacterium sp. RU33B	16	47	0	21	15	207	7	37	33	150	24	65	223	467	46	39	505
Bacteria	Actinobacteria	Actinomycetia	Micrococcales	Microbacteriaceae	Microbacterium	Microbacterium sp. RURRCA19A	29	51	0	80	11	127	39	16	1	111	74	63	117	114	103	53	109
Bacteria	Actinobacteria	Actinomycetia	Micrococcales	Microbacteriaceae	Microbacterium	Microbacterium sp. Sa1CUA4	53	60	0	95	6	70	26	43	9	226	24	77	130	357	20	102	161
Bacteria	Actinobacteria	Actinomycetia	Micrococcales	Microbacteriaceae	Microbacterium	Microbacterium sp. SA39	16	36	0	0	0	52	1	6	21	44	1	7	44	56	11	10	93
Bacteria	Actinobacteria	Actinomycetia	Micrococcales	Microbacteriaceae	Microbacterium	Microbacterium sp. Sa4CUA7	38	102	0	2	144	164	9	21	0	70	46	86	233	559	60	32	6
Bacteria	Actinobacteria	Actinomycetia	Micrococcales	Microbacteriaceae	Microbacterium	Microbacterium sp. SAI-030	163	120	201	67	102	57	608	542	39	79	46	0	135	26	46	29	70
Bacteria	Actinobacteria	Actinomycetia	Micrococcales	Microbacteriaceae	Microbacterium	Microbacterium sp. SCN 69-37	1	1	0	0	16	87	38	0	37	21	18	76	36	52	0	4	38
Bacteria	Actinobacteria	Actinomycetia	Micrococcales	Microbacteriaceae	Microbacterium	Microbacterium sp. SCN 70-18	11	39	0	1	34	18	6	43	29	29	30	39	82	105	90	17	242
Bacteria	Actinobacteria	Actinomycetia	Micrococcales	Microbacteriaceae	Microbacterium	Microbacterium sp. SCN 70-27	147	74	0	170	76	25	12	7	21	129	7	46	217	271	147	49	193
Bacteria	Actinobacteria	Actinomycetia	Micrococcales	Microbacteriaceae	Microbacterium	Microbacterium sp. SCN 71-17	1	13	1	0	0	2	0	0	0	0	0	0	0	0	0	17	0
Bacteria	Actinobacteria	Actinomycetia	Micrococcales	Microbacteriaceae	Microbacterium	Microbacterium sp. Se63.02b	26	41	0	0	30	57	24	0	118	130	76	20	212	145	1	43	24
Bacteria	Actinobacteria	Actinomycetia	Micrococcales	Microbacteriaceae	Microbacterium	Microbacterium sp. SLBN-1	48	123	0	47	21	27	19	38	40	184	64	32	226	165	39	84	186
Bacteria	Actinobacteria	Actinomycetia	Micrococcales	Microbacteriaceae	Microbacterium	Microbacterium sp. SLBN-146	19	59	2	24	26	29	2	0	1	114	87	89	151	93	25	27	139
Bacteria	Actinobacteria	Actinomycetia	Micrococcales	Microbacteriaceae	Microbacterium	Microbacterium sp. SLBN-154	13	63	2	49	48	42	10	4	0	77	37	0	97	69	78	11	119
Bacteria	Actinobacteria	Actinomycetia	Micrococcales	Microbacteriaceae	Microbacterium	Microbacterium sp. SLBN-158	47	138	5	58	55	51	39	51	166	220	114	56	202	258	83	105	184
Bacteria	Actinobacteria	Actinomycetia	Micrococcales	Microbacteriaceae	Microbacterium	Microbacterium sp. str. 'China'	21	62	0	32	0	46	0	10	4	106	2	67	102	88	33	18	17
Bacteria	Actinobacteria	Actinomycetia	Micrococcales	Microbacteriaceae	Microbacterium	Microbacterium sp. SUBG005	30	26	0	0	0	92	2	0	0	38	21	4	95	69	29	5	0
Bacteria	Actinobacteria	Actinomycetia	Micrococcales	Microbacteriaceae	Microbacterium	Microbacterium sp. SYP-A9085	44	70	0	69	33	88	12	11	36	117	21	19	113	168	105	14	96
Bacteria	Actinobacteria	Actinomycetia	Micrococcales	Microbacteriaceae	Microbacterium	Microbacterium sp. SZ1	0	55	0	0	16	17	5	0	17	40	0	30	89	49	16	11	0
Bacteria	Actinobacteria	Actinomycetia	Micrococcales	Microbacteriaceae	Microbacterium	Microbacterium sp. T32	0	6	0	0	26	3	16	15	0	5	6	56	99	380	0	2	30
Bacteria	Actinobacteria	Actinomycetia	Micrococcales	Microbacteriaceae	Microbacterium	Microbacterium sp. TL13	0	0	0	0	0	20	0	0	0	0	0	0	15	0	0	7	0
Bacteria	Actinobacteria	Actinomycetia	Micrococcales	Microbacteriaceae	Microbacterium	Microbacterium sp. TNHR37B	19	115	3	37	68	88	2	45	40	158	66	105	345	46	25	59	46
Bacteria	Actinobacteria	Actinomycetia	Micrococcales	Microbacteriaceae	Microbacterium	Microbacterium sp. TPD7012	1	76	1	30	1	48	3	66	17	116	1	26	109	111	20	6	55
Bacteria	Actinobacteria	Actinomycetia	Micrococcales	Microbacteriaceae	Microbacterium	Microbacterium sp. TS-1	1	6	0	31	34	51	0	0	0	35	14	92	43	40	0	1	24
Bacteria	Actinobacteria	Actinomycetia	Micrococcales	Microbacteriaceae	Microbacterium	Microbacterium sp. UCD-TDU	7	34	0	1	0	46	14	28	26	60	40	0	68	186	9	43	20
Bacteria	Actinobacteria	Actinomycetia	Micrococcales	Microbacteriaceae	Microbacterium	Microbacterium sp. UFMG61	0	12	0	25	12	17	0	0	6	8	12	1	113	86	3	15	0
Bacteria	Actinobacteria	Actinomycetia	Micrococcales	Microbacteriaceae	Microbacterium	Microbacterium sp. UMB0228	31	16	0	9	9	10	0	0	3	1	4	0	26	28	0	27	0
Bacteria	Actinobacteria	Actinomycetia	Micrococcales	Microbacteriaceae	Microbacterium	Microbacterium sp. URHA0036	0	3	10	0	0	18	0	6	67	0	23	0	24	0	38	16	0
Bacteria	Actinobacteria	Actinomycetia	Micrococcales	Microbacteriaceae	Microbacterium	Microbacterium sp. VKM Ac-2870	21	110	0	81	19	212	19	0	47	88	46	61	203	71	34	27	108
Bacteria	Actinobacteria	Actinomycetia	Micrococcales	Microbacteriaceae	Microbacterium	Microbacterium sp. WY121	12	55	2	71	28	79	32	0	16	121	36	0	70	330	58	17	34
Bacteria	Actinobacteria	Actinomycetia	Micrococcales	Microbacteriaceae	Microbacterium	Microbacterium sp. XT11	51	5	0	38	74	85	0	0	1	29	5	59	92	116	19	1	17
Bacteria	Actinobacteria	Actinomycetia	Micrococcales	Microbacteriaceae	Microbacterium	Microbacterium sp. Y-01	2	3	0	0	28	14	0	0	0	0	0	0	24	0	15	1	44
Bacteria	Actinobacteria	Actinomycetia	Micrococcales	Microbacteriaceae	Microbacterium	Microbacterium sp. Yaish 1	0	2	0	26	17	0	3	6	20	19	17	2	29	73	1	27	0
Bacteria	Actinobacteria	Actinomycetia	Micrococcales	Microbacteriaceae	Microbacterium	Microbacterium sp. YJN-G	5	82	20	0	6	123	37	7	15	131	38	16	99	65	59	11	67
Bacteria	Actinobacteria	Actinomycetia	Micrococcales	Microbacteriaceae	Microbacterium	Microbacterium sp. ZOR0019	0	7	0	0	0	0	16	10	0	37	0	0	45	33	0	12	8
Bacteria	Actinobacteria	Actinomycetia	Micrococcales	Microbacteriaceae	Microbacterium	Microbacterium sp. ZXX196	0	6	0	33	1	24	3	3	0	64	14	42	39	32	11	15	45
Bacteria	Actinobacteria	Actinomycetia	Micrococcales	Microbacteriaceae	Microbacterium	Microbacterium sp.	207	2002	4	819	286	1178	284	215	320	2902	417	506	3214	1290	880	430	882
Bacteria	Actinobacteria	Actinomycetia	Micrococcales	Microbacteriaceae	Microbacterium	Microbacterium suaedae	22	87	2	1	0	8	13	12	9	37	28	0	134	85	2	8	38
Bacteria	Actinobacteria	Actinomycetia	Micrococcales	Microbacteriaceae	Microbacterium	Microbacterium telephonicum	21	96	1	3	38	19	14	0	28	114	24	14	264	219	104	21	124
Bacteria	Actinobacteria	Actinomycetia	Micrococcales	Microbacteriaceae	Microbacterium	Microbacterium testaceum	45	253	6	2	90	536	57	107	89	258	162	37	382	545	215	125	233
Bacteria	Actinobacteria	Actinomycetia	Micrococcales	Microbacteriaceae	Microbacterium	Microbacterium thalassium	27	115	5	50	54	107	14	42	66	226	52	74	253	219	34	97	155
Bacteria	Actinobacteria	Actinomycetia	Micrococcales	Microbacteriaceae	Microbacterium	Microbacterium timonense	0	55	4	98	89	20	16	8	1	182	35	0	83	154	116	36	44
Bacteria	Actinobacteria	Actinomycetia	Micrococcales	Microbacteriaceae	Microbacterium	Microbacterium trichothecenolyticum	49	65	7	16	75	178	18	6	28	127	33	135	365	229	80	43	143
Bacteria	Actinobacteria	Actinomycetia	Micrococcales	Microbacteriaceae	Microbacterium	Microbacterium ulmi	76	55	2	28	2	639	38	12	21	195	54	49	187	493	128	10	143
Bacteria	Actinobacteria	Actinomycetia	Micrococcales	Microbacteriaceae	Microbacterium	Microbacterium yannicii	41	212	2	151	50	60	64	12	83	373	73	92	342	721	86	149	183
Bacteria	Actinobacteria	Actinomycetia	Micrococcales	Microbacteriaceae	Microbacterium	uncultured Microbacterium sp.	16	124	0	30	94	104	29	33	60	223	175	42	103	144	84	34	101
Bacteria	Actinobacteria	Actinomycetia	Micrococcales	Microbacteriaceae	Pseudoclavibacter	Pseudoclavibacter alba	650	4642	4	1388	1127	1013	479	423	1035	4035	977	1254	5643	1133	1822	886	887
Bacteria	Actinobacteria	Actinomycetia	Micrococcales	Microbacteriaceae	Pseudoclavibacter	Pseudoclavibacter caeni	39	12	2	23	17	98	8	37	33	45	1	1	155	311	96	26	59
Bacteria	Actinobacteria	Actinomycetia	Micrococcales	Microbacteriaceae	Pseudoclavibacter	Pseudoclavibacter chungangensis	52	74	1	71	10	59	13	14	2	100	41	3	298	561	68	56	99
Bacteria	Actinobacteria	Actinomycetia	Micrococcales	Microbacteriaceae	Pseudoclavibacter	Pseudoclavibacter endophyticus	78	87	3	22	29	4	1	16	1	182	0	136	272	241	140	63	55
Bacteria	Actinobacteria	Actinomycetia	Micrococcales	Microbacteriaceae	Pseudoclavibacter	Pseudoclavibacter helvolus	15	86	0	57	54	75	1	29	21	59	67	31	125	109	105	55	149
Bacteria	Actinobacteria	Actinomycetia	Micrococcales	Microbacteriaceae	Pseudoclavibacter	Pseudoclavibacter soli	16	8	3	44	2	45	23	22	45	44	57	59	59	65	56	49	8
Bacteria	Actinobacteria	Actinomycetia	Micrococcales	Microbacteriaceae	Pseudoclavibacter	Pseudoclavibacter sp. 8L	39	145	0	142	7	130	22	5	77	151	51	229	219	76	19	11	100
Bacteria	Actinobacteria	Actinomycetia	Micrococcales	Microbacteriaceae	Pseudoclavibacter	Pseudoclavibacter sp. AY1F1	52	54	1	5	47	25	17	0	45	75	2	0	53	21	0	18	2
Bacteria	Actinobacteria	Actinomycetia	Micrococcales	Microbacteriaceae	Pseudoclavibacter	Pseudoclavibacter sp. AY1H1	0	10	0	0	0	0	0	0	0	0	1	0	0	0	42	7	0
Bacteria	Actinobacteria	Actinomycetia	Micrococcales	Microbacteriaceae	Pseudoclavibacter	Pseudoclavibacter sp. CFCC 11306	0	22	0	1	23	42	8	13	35	47	21	19	33	52	26	13	105
Bacteria	Actinobacteria	Actinomycetia	Micrococcales	Microbacteriaceae	Pseudoclavibacter	Pseudoclavibacter sp. CFCC 14310	1	16	0	1	1	1	0	0	0	5	0	1	0	0	2	3	0
Bacteria	Actinobacteria	Actinomycetia	Micrococcales	Microbacteriaceae	Pseudoclavibacter	Pseudoclavibacter sp. JAI123	0	6	0	0	0	0	0	7	0	1	13	0	3	36	0	13	34
Bacteria	Actinobacteria	Actinomycetia	Micrococcales	Microbacteriaceae	Pseudoclavibacter	Pseudoclavibacter sp. RFBA6	0	9	0	18	0	0	0	0	0	9	28	0	50	51	21	18	89
Bacteria	Actinobacteria	Actinomycetia	Micrococcales	Microbacteriaceae	Pseudoclavibacter	Pseudoclavibacter sp. RFBB5	0	12	0	0	0	20	0	11	14	19	11	0	0	47	1	9	0
Bacteria	Actinobacteria	Actinomycetia	Micrococcales	Microbacteriaceae	Pseudoclavibacter	Pseudoclavibacter sp. RFBG4	10	18	0	0	22	14	0	0	0	8	0	0	2	34	27	1	37
Bacteria	Actinobacteria	Actinomycetia	Micrococcales	Microbacteriaceae	Pseudoclavibacter	Pseudoclavibacter sp. RFBJ3	0	0	0	0	0	0	0	0	0	0	0	0	0	0	0	1	0
Bacteria	Actinobacteria	Actinomycetia	Micrococcales	Microbacteriaceae	Pseudoclavibacter	Pseudoclavibacter sp. VKM Ac-2888	13	23	1	11	0	38	0	20	0	22	1	0	41	1	0	5	0
Bacteria	Actinobacteria	Actinomycetia	Micrococcales	Microbacteriaceae	Pseudoclavibacter	Pseudoclavibacter sp. YIM M12148	0	46	0	0	40	16	9	0	0	27	1	0	114	28	0	9	125
Bacteria	Actinobacteria	Actinomycetia	Micrococcales	Micrococcaceae	Arthrobacter	Arthrobacter agilis	69	37	0	3	58	202	10	0	46	176	147	82	356	122	73	38	107
Bacteria	Actinobacteria	Actinomycetia	Micrococcales	Micrococcaceae	Arthrobacter	Arthrobacter alpinus	17	38	0	1	1	40	41	10	1	119	31	30	178	255	9	44	71
Bacteria	Actinobacteria	Actinomycetia	Micrococcales	Micrococcaceae	Arthrobacter	Arthrobacter bussei	0	25	0	26	2	67	6	25	1	46	51	0	87	114	43	21	15
Bacteria	Actinobacteria	Actinomycetia	Micrococcales	Micrococcaceae	Arthrobacter	Arthrobacter castelli	21	93	1	27	76	54	17	15	16	105	4	33	214	576	88	17	25
Bacteria	Actinobacteria	Actinomycetia	Micrococcales	Micrococcaceae	Arthrobacter	Arthrobacter citreus	0	30	0	21	17	185	8	39	1	75	2	0	180	497	33	2	0
Bacteria	Actinobacteria	Actinomycetia	Micrococcales	Micrococcaceae	Arthrobacter	Arthrobacter crystallopoietes	42	81	7	79	131	454	39	36	78	172	33	177	551	1223	47	123	61
Bacteria	Actinobacteria	Actinomycetia	Micrococcales	Micrococcaceae	Arthrobacter	Arthrobacter cupressi	1	37	0	1	29	0	21	18	0	31	0	0	34	35	1	20	1
Bacteria	Actinobacteria	Actinomycetia	Micrococcales	Micrococcaceae	Arthrobacter	Arthrobacter dokdonellae	17	24	0	1	4	36	8	0	16	56	16	27	82	79	3	26	26
Bacteria	Actinobacteria	Actinomycetia	Micrococcales	Micrococcaceae	Arthrobacter	Arthrobacter echini	39	68	5	135	83	491	46	6	39	144	65	1	216	212	30	16	150
Bacteria	Actinobacteria	Actinomycetia	Micrococcales	Micrococcaceae	Arthrobacter	Arthrobacter gandavensis	38	60	2	55	64	66	0	77	30	73	8	26	70	98	20	6	16
Bacteria	Actinobacteria	Actinomycetia	Micrococcales	Micrococcaceae	Arthrobacter	Arthrobacter glacialis	12	12	2	69	55	21	0	4	72	74	18	17	118	238	56	19	16
Bacteria	Actinobacteria	Actinomycetia	Micrococcales	Micrococcaceae	Arthrobacter	Arthrobacter globiformis	45	103	1	67	48	267	6	30	0	159	14	55	240	482	93	85	111
Bacteria	Actinobacteria	Actinomycetia	Micrococcales	Micrococcaceae	Arthrobacter	Arthrobacter koreensis	0	1	0	1	0	2	6	5	0	0	5	0	1	115	37	4	1
Bacteria	Actinobacteria	Actinomycetia	Micrococcales	Micrococcaceae	Arthrobacter	Arthrobacter liuii	22	36	0	2	17	5	19	12	41	51	0	77	62	303	53	1	47
Bacteria	Actinobacteria	Actinomycetia	Micrococcales	Micrococcaceae	Arthrobacter	Arthrobacter livingstonensis	6	40	2	99	68	104	1	20	5	182	18	22	115	137	98	29	104
Bacteria	Actinobacteria	Actinomycetia	Micrococcales	Micrococcaceae	Arthrobacter	Arthrobacter nitrophenolicus	29	75	2	9	5	63	13	15	10	62	17	30	66	65	91	17	81
Bacteria	Actinobacteria	Actinomycetia	Micrococcales	Micrococcaceae	Arthrobacter	Arthrobacter oryzae	1	82	1	35	39	16	28	19	19	71	44	39	85	228	56	19	60
Bacteria	Actinobacteria	Actinomycetia	Micrococcales	Micrococcaceae	Arthrobacter	Arthrobacter pigmenti	17	84	2	17	91	31	9	37	14	78	15	0	139	80	60	58	66
Bacteria	Actinobacteria	Actinomycetia	Micrococcales	Micrococcaceae	Arthrobacter	Arthrobacter pityocampae	21	73	2	37	22	31	3	25	71	33	25	54	190	271	97	7	7
Bacteria	Actinobacteria	Actinomycetia	Micrococcales	Micrococcaceae	Arthrobacter	Arthrobacter psychrochitiniphilus	7	64	1	23	26	55	8	23	26	131	29	54	133	180	3	57	94
Bacteria	Actinobacteria	Actinomycetia	Micrococcales	Micrococcaceae	Arthrobacter	Arthrobacter psychrolactophilus	17	76	0	1	16	54	4	12	16	32	14	22	80	17	1	44	121
Bacteria	Actinobacteria	Actinomycetia	Micrococcales	Micrococcaceae	Arthrobacter	Arthrobacter rhombi	0	17	0	29	12	0	9	6	3	24	2	0	61	1	0	23	16
Bacteria	Actinobacteria	Actinomycetia	Micrococcales	Micrococcaceae	Arthrobacter	Arthrobacter ruber	7	44	4	41	0	89	8	0	2	14	96	8	78	107	3	28	86
Bacteria	Actinobacteria	Actinomycetia	Micrococcales	Micrococcaceae	Arthrobacter	Arthrobacter saudimassiliensis	3	51	2	39	0	87	9	12	63	109	9	22	145	78	10	9	2
Bacteria	Actinobacteria	Actinomycetia	Micrococcales	Micrococcaceae	Arthrobacter	Arthrobacter silvisoli	1	4	0	1	0	1	4	5	45	74	7	67	35	16	8	35	27
Bacteria	Actinobacteria	Actinomycetia	Micrococcales	Micrococcaceae	Arthrobacter	Arthrobacter silviterrae	15	60	1	0	0	0	2	12	0	58	23	1	128	90	31	43	30
Bacteria	Actinobacteria	Actinomycetia	Micrococcales	Micrococcaceae	Arthrobacter	Arthrobacter sp. 08Y14	0	0	0	0	0	50	4	0	0	18	0	0	6	77	44	1	0
Bacteria	Actinobacteria	Actinomycetia	Micrococcales	Micrococcaceae	Arthrobacter	Arthrobacter sp. 131MFCol6.1	0	5	0	0	0	2	0	0	0	0	11	0	3	16	0	5	1
Bacteria	Actinobacteria	Actinomycetia	Micrococcales	Micrococcaceae	Arthrobacter	Arthrobacter sp. 162MFSha1.1	0	0	0	40	0	0	1	0	0	0	0	1	35	49	0	1	0
Bacteria	Actinobacteria	Actinomycetia	Micrococcales	Micrococcaceae	Arthrobacter	Arthrobacter sp. 1704	0	3	0	20	0	0	6	0	0	0	0	51	26	13	0	1	0
Bacteria	Actinobacteria	Actinomycetia	Micrococcales	Micrococcaceae	Arthrobacter	Arthrobacter sp. 18067	25	2	0	0	0	19	0	0	0	42	1	18	6	21	0	9	1
Bacteria	Actinobacteria	Actinomycetia	Micrococcales	Micrococcaceae	Arthrobacter	Arthrobacter sp. 208	28	11	0	62	0	3	6	2	43	0	0	1	3	11	31	5	2
Bacteria	Actinobacteria	Actinomycetia	Micrococcales	Micrococcaceae	Arthrobacter	Arthrobacter sp. 24S4-2	58	48	0	29	5	15	28	36	6	68	25	23	127	134	108	45	1
Bacteria	Actinobacteria	Actinomycetia	Micrococcales	Micrococcaceae	Arthrobacter	Arthrobacter sp. 260	3	29	0	0	1	27	0	8	10	27	1	0	1	6	80	21	27
Bacteria	Actinobacteria	Actinomycetia	Micrococcales	Micrococcaceae	Arthrobacter	Arthrobacter sp. 35/47	16	5	10	0	2	0	25	29	0	31	0	37	80	1	24	12	27
Bacteria	Actinobacteria	Actinomycetia	Micrococcales	Micrococcaceae	Arthrobacter	Arthrobacter sp. 35W	0	62	1	33	56	7	4	23	31	94	98	3	119	94	74	8	104
Bacteria	Actinobacteria	Actinomycetia	Micrococcales	Micrococcaceae	Arthrobacter	Arthrobacter sp. 49Tsu3.1M3	19	2	0	1	12	12	7	0	9	21	19	12	41	3	31	1	15
Bacteria	Actinobacteria	Actinomycetia	Micrococcales	Micrococcaceae	Arthrobacter	Arthrobacter sp. 785	10	0	0	0	1	51	0	0	0	4	2	0	41	4	0	14	0
Bacteria	Actinobacteria	Actinomycetia	Micrococcales	Micrococcaceae	Arthrobacter	Arthrobacter sp. 8AJ	28	113	2	77	100	1	27	0	0	172	38	39	308	201	60	36	187
Bacteria	Actinobacteria	Actinomycetia	Micrococcales	Micrococcaceae	Arthrobacter	Arthrobacter sp. 9AX	0	51	1	30	19	195	7	7	7	78	42	1	174	230	83	7	57
Bacteria	Actinobacteria	Actinomycetia	Micrococcales	Micrococcaceae	Arthrobacter	Arthrobacter sp. 9E14	6	0	0	0	42	2	10	1	43	34	23	27	10	41	0	13	1
Bacteria	Actinobacteria	Actinomycetia	Micrococcales	Micrococcaceae	Arthrobacter	Arthrobacter sp. 9MFCol3.1	0	4	0	0	22	3	0	0	0	36	30	0	55	0	0	11	30
Bacteria	Actinobacteria	Actinomycetia	Micrococcales	Micrococcaceae	Arthrobacter	Arthrobacter sp. 9V	1	48	3	17	5	57	10	15	12	59	22	4	33	49	67	16	40
Bacteria	Actinobacteria	Actinomycetia	Micrococcales	Micrococcaceae	Arthrobacter	Arthrobacter sp. AAC22	0	49	0	0	0	1	0	0	22	19	1	0	63	108	23	1	18
Bacteria	Actinobacteria	Actinomycetia	Micrococcales	Micrococcaceae	Arthrobacter	Arthrobacter sp. AET 35A	0	11	0	0	5	2	1	0	0	27	0	0	2	15	0	14	0
Bacteria	Actinobacteria	Actinomycetia	Micrococcales	Micrococcaceae	Arthrobacter	Arthrobacter sp. AETb3-4	48	49	0	62	1	76	20	18	46	148	30	28	43	34	47	43	64
Bacteria	Actinobacteria	Actinomycetia	Micrococcales	Micrococcaceae	Arthrobacter	Arthrobacter sp. AFG20	0	2	3	0	40	0	0	1	1	43	14	0	147	104	2	2	0
Bacteria	Actinobacteria	Actinomycetia	Micrococcales	Micrococcaceae	Arthrobacter	Arthrobacter sp. AFG7.2	20	33	1	42	0	0	25	0	9	5	21	26	73	78	37	18	2
Bacteria	Actinobacteria	Actinomycetia	Micrococcales	Micrococcaceae	Arthrobacter	Arthrobacter sp. AG1021	2	0	0	0	0	7	0	0	25	16	0	0	59	45	0	22	0
Bacteria	Actinobacteria	Actinomycetia	Micrococcales	Micrococcaceae	Arthrobacter	Arthrobacter sp. Alg241-R88	0	10	0	28	22	10	1	29	0	42	8	0	63	2	33	5	125
Bacteria	Actinobacteria	Actinomycetia	Micrococcales	Micrococcaceae	Arthrobacter	Arthrobacter sp. AQ5-05	0	23	0	18	0	57	8	3	39	56	32	0	55	41	96	30	17
Bacteria	Actinobacteria	Actinomycetia	Micrococcales	Micrococcaceae	Arthrobacter	Arthrobacter sp. AQ5-06	0	56	0	26	25	15	6	7	0	29	0	43	53	54	25	3	0
Bacteria	Actinobacteria	Actinomycetia	Micrococcales	Micrococcaceae	Arthrobacter	Arthrobacter sp. AZCC_0090	0	72	0	0	0	13	4	17	19	47	21	0	28	87	82	21	17
Bacteria	Actinobacteria	Actinomycetia	Micrococcales	Micrococcaceae	Arthrobacter	Arthrobacter sp. B0490	12	26	0	26	25	0	0	24	13	146	159	3	116	16	51	34	1
Bacteria	Actinobacteria	Actinomycetia	Micrococcales	Micrococcaceae	Arthrobacter	Arthrobacter sp. B1805	19	66	0	38	40	54	25	42	63	168	136	29	200	73	46	54	182
Bacteria	Actinobacteria	Actinomycetia	Micrococcales	Micrococcaceae	Arthrobacter	Arthrobacter sp. B6	1	12	2	14	58	26	3	10	37	17	1	0	41	74	2	10	21
Bacteria	Actinobacteria	Actinomycetia	Micrococcales	Micrococcaceae	Arthrobacter	Arthrobacter sp. Br18	20	33	1	30	49	1	3	3	15	28	28	85	34	96	53	35	80
Bacteria	Actinobacteria	Actinomycetia	Micrococcales	Micrococcaceae	Arthrobacter	Arthrobacter sp. Bz4	0	5	1	0	0	38	1	0	0	36	18	0	20	81	0	9	24
Bacteria	Actinobacteria	Actinomycetia	Micrococcales	Micrococcaceae	Arthrobacter	Arthrobacter sp. C9C5	0	14	0	8	49	92	0	7	23	8	0	0	61	142	0	4	38
Bacteria	Actinobacteria	Actinomycetia	Micrococcales	Micrococcaceae	Arthrobacter	Arthrobacter sp. CAL618	0	1	0	0	0	23	0	0	0	9	0	0	0	0	0	7	18
Bacteria	Actinobacteria	Actinomycetia	Micrococcales	Micrococcaceae	Arthrobacter	Arthrobacter sp. CAN_A1	6	11	4	1	79	1	3	0	46	43	8	33	45	21	62	16	0
Bacteria	Actinobacteria	Actinomycetia	Micrococcales	Micrococcaceae	Arthrobacter	Arthrobacter sp. CAN_A2	1	1	0	0	12	47	0	7	16	38	14	0	43	3	67	7	81
Bacteria	Actinobacteria	Actinomycetia	Micrococcales	Micrococcaceae	Arthrobacter	Arthrobacter sp. CAN_A212	2	36	9	16	6	12	8	11	1	54	16	2	68	26	172	14	68
Bacteria	Actinobacteria	Actinomycetia	Micrococcales	Micrococcaceae	Arthrobacter	Arthrobacter sp. CAN_A214	1	14	1	0	1	12	10	5	4	50	61	98	24	81	62	31	46
Bacteria	Actinobacteria	Actinomycetia	Micrococcales	Micrococcaceae	Arthrobacter	Arthrobacter sp. CAU 1506	1	65	2	21	86	197	1	26	32	113	70	27	101	340	79	6	9
Bacteria	Actinobacteria	Actinomycetia	Micrococcales	Micrococcaceae	Arthrobacter	Arthrobacter sp. cf158	1	7	0	7	0	12	0	0	0	21	0	15	36	68	1	2	0
Bacteria	Actinobacteria	Actinomycetia	Micrococcales	Micrococcaceae	Arthrobacter	Arthrobacter sp. DR-2P	0	12	5	21	34	25	17	0	14	4	0	0	20	81	0	25	1
Bacteria	Actinobacteria	Actinomycetia	Micrococcales	Micrococcaceae	Arthrobacter	Arthrobacter sp. DWC3	95	234	3	33	168	118	63	73	71	317	315	144	340	190	109	224	225
Bacteria	Actinobacteria	Actinomycetia	Micrococcales	Micrococcaceae	Arthrobacter	Arthrobacter sp. E918	0	32	2	74	13	34	2	8	28	42	44	3	229	470	125	25	62
Bacteria	Actinobacteria	Actinomycetia	Micrococcales	Micrococcaceae	Arthrobacter	Arthrobacter sp. EpRS71	13	0	0	22	21	1	0	0	0	1	17	2	20	58	7	2	1
Bacteria	Actinobacteria	Actinomycetia	Micrococcales	Micrococcaceae	Arthrobacter	Arthrobacter sp. EPSL27	1	35	2	0	14	541	0	30	0	9	0	17	66	126	89	28	3
Bacteria	Actinobacteria	Actinomycetia	Micrococcales	Micrococcaceae	Arthrobacter	Arthrobacter sp. ERGS1:01	11	48	5	108	59	79	24	28	80	24	33	1	129	213	24	29	46
Bacteria	Actinobacteria	Actinomycetia	Micrococcales	Micrococcaceae	Arthrobacter	Arthrobacter sp. FB24	0	58	1	28	17	12	19	16	21	43	37	57	22	56	25	47	4
Bacteria	Actinobacteria	Actinomycetia	Micrococcales	Micrococcaceae	Arthrobacter	Arthrobacter sp. GMC3	249	918	6	461	326	615	215	277	509	1362	183	497	930	344	819	769	909
Bacteria	Actinobacteria	Actinomycetia	Micrococcales	Micrococcaceae	Arthrobacter	Arthrobacter sp. H-02-3	13	34	0	0	8	9	13	0	15	142	8	70	22	10	1	101	25
Bacteria	Actinobacteria	Actinomycetia	Micrococcales	Micrococcaceae	Arthrobacter	Arthrobacter sp. H14	27	50	6	67	39	120	21	57	1	67	48	31	32	197	120	14	78
Bacteria	Actinobacteria	Actinomycetia	Micrococcales	Micrococcaceae	Arthrobacter	Arthrobacter sp. H20	17	28	1	1	0	27	31	9	10	92	6	22	61	26	29	16	113
Bacteria	Actinobacteria	Actinomycetia	Micrococcales	Micrococcaceae	Arthrobacter	Arthrobacter sp. H41	5	16	0	2	1	46	5	0	9	91	40	0	74	61	50	22	37
Bacteria	Actinobacteria	Actinomycetia	Micrococcales	Micrococcaceae	Arthrobacter	Arthrobacter sp. H5	11	83	7	26	35	50	1	12	2	9	26	1	75	122	46	30	64
Bacteria	Actinobacteria	Actinomycetia	Micrococcales	Micrococcaceae	Arthrobacter	Arthrobacter sp. Hiyo1	29	29	1	20	0	23	12	0	2	88	21	2	109	150	20	34	1
Bacteria	Actinobacteria	Actinomycetia	Micrococcales	Micrococcaceae	Arthrobacter	Arthrobacter sp. Hiyo4	0	49	0	57	53	85	5	42	13	108	70	90	216	236	180	35	88
Bacteria	Actinobacteria	Actinomycetia	Micrococcales	Micrococcaceae	Arthrobacter	Arthrobacter sp. Hiyo6	23	30	1	31	14	438	15	15	0	115	11	2	137	272	20	36	22
Bacteria	Actinobacteria	Actinomycetia	Micrococcales	Micrococcaceae	Arthrobacter	Arthrobacter sp. Hiyo8	21	130	0	80	27	119	26	97	90	313	7	32	254	369	145	76	54
Bacteria	Actinobacteria	Actinomycetia	Micrococcales	Micrococcaceae	Arthrobacter	Arthrobacter sp. HMSC06H05	0	30	0	0	7	25	0	0	0	25	0	0	29	14	0	1	1
Bacteria	Actinobacteria	Actinomycetia	Micrococcales	Micrococcaceae	Arthrobacter	Arthrobacter sp. HMWF013	95	75	3	31	29	101	11	12	46	95	24	24	181	467	79	36	53
Bacteria	Actinobacteria	Actinomycetia	Micrococcales	Micrococcaceae	Arthrobacter	Arthrobacter sp. Hz2	1	50	8	19	9	13	6	0	22	66	68	28	66	5	3	4	95
Bacteria	Actinobacteria	Actinomycetia	Micrococcales	Micrococcaceae	Arthrobacter	Arthrobacter sp. I3	26	40	0	56	0	45	4	0	37	72	2	0	52	117	2	12	60
Bacteria	Actinobacteria	Actinomycetia	Micrococcales	Micrococcaceae	Arthrobacter	Arthrobacter sp. IA7	21	30	0	0	31	8	7	10	0	25	15	17	59	54	98	41	21
Bacteria	Actinobacteria	Actinomycetia	Micrococcales	Micrococcaceae	Arthrobacter	Arthrobacter sp. J391	0	9	0	13	1	0	0	0	41	28	13	0	16	0	1	9	0
Bacteria	Actinobacteria	Actinomycetia	Micrococcales	Micrococcaceae	Arthrobacter	Arthrobacter sp. J915	0	1	1	0	16	2	1	14	0	0	0	0	4	50	0	3	0
Bacteria	Actinobacteria	Actinomycetia	Micrococcales	Micrococcaceae	Arthrobacter	Arthrobacter sp. JUb115	45	33	0	0	12	55	11	15	0	3	0	0	37	28	2	11	5
Bacteria	Actinobacteria	Actinomycetia	Micrococcales	Micrococcaceae	Arthrobacter	Arthrobacter sp. KBS0702	15	2	2	39	29	78	2	8	29	28	4	0	5	42	29	2	4
Bacteria	Actinobacteria	Actinomycetia	Micrococcales	Micrococcaceae	Arthrobacter	Arthrobacter sp. KBS0703	24	45	1	0	14	14	0	5	15	99	0	1	68	46	7	10	48
Bacteria	Actinobacteria	Actinomycetia	Micrococcales	Micrococcaceae	Arthrobacter	Arthrobacter sp. L77	64	36	1	21	0	12	1	17	18	43	81	6	85	109	5	9	102
Bacteria	Actinobacteria	Actinomycetia	Micrococcales	Micrococcaceae	Arthrobacter	Arthrobacter sp. Leaf137	0	41	0	1	0	2	17	0	34	22	0	4	18	64	18	14	23
Bacteria	Actinobacteria	Actinomycetia	Micrococcales	Micrococcaceae	Arthrobacter	Arthrobacter sp. Leaf145	5	9	0	1	1	0	0	6	0	0	0	19	15	41	0	8	0
Bacteria	Actinobacteria	Actinomycetia	Micrococcales	Micrococcaceae	Arthrobacter	Arthrobacter sp. Leaf234	0	7	1	1	1	0	0	0	0	4	11	25	14	67	0	26	32
Bacteria	Actinobacteria	Actinomycetia	Micrococcales	Micrococcaceae	Arthrobacter	Arthrobacter sp. Leaf337	1	23	1	73	65	35	15	11	0	123	0	0	72	55	0	21	66
Bacteria	Actinobacteria	Actinomycetia	Micrococcales	Micrococcaceae	Arthrobacter	Arthrobacter sp. Leaf69	19	18	0	33	0	28	3	0	17	52	21	17	70	1	22	13	66
Bacteria	Actinobacteria	Actinomycetia	Micrococcales	Micrococcaceae	Arthrobacter	Arthrobacter sp. M2012083	0	26	0	0	0	0	7	1	0	22	0	0	16	14	4	10	2
Bacteria	Actinobacteria	Actinomycetia	Micrococcales	Micrococcaceae	Arthrobacter	Arthrobacter sp. MA-N2	0	60	0	0	0	3	0	29	60	54	15	12	112	99	32	45	2
Bacteria	Actinobacteria	Actinomycetia	Micrococcales	Micrococcaceae	Arthrobacter	Arthrobacter sp. MDT2-14	135	331	0	125	121	200	109	47	100	432	42	121	431	259	296	229	493
Bacteria	Actinobacteria	Actinomycetia	Micrococcales	Micrococcaceae	Arthrobacter	Arthrobacter sp. MN05-02	10	30	0	2	15	31	20	26	54	38	22	62	176	346	80	8	14
Bacteria	Actinobacteria	Actinomycetia	Micrococcales	Micrococcaceae	Arthrobacter	Arthrobacter sp. MSA 4-2	0	10	0	1	0	14	7	0	0	19	16	0	68	12	53	8	0
Bacteria	Actinobacteria	Actinomycetia	Micrococcales	Micrococcaceae	Arthrobacter	Arthrobacter sp. MWB30	0	22	1	0	0	6	4	19	0	22	5	4	15	19	54	17	34
Bacteria	Actinobacteria	Actinomycetia	Micrococcales	Micrococcaceae	Arthrobacter	Arthrobacter sp. MYb213	0	13	0	1	27	27	3	0	0	10	23	0	70	90	2	8	1
Bacteria	Actinobacteria	Actinomycetia	Micrococcales	Micrococcaceae	Arthrobacter	Arthrobacter sp. MYb214	0	0	0	0	8	428	0	0	0	0	4	0	22	69	15	10	0
Bacteria	Actinobacteria	Actinomycetia	Micrococcales	Micrococcaceae	Arthrobacter	Arthrobacter sp. MYb227	0	11	2	18	5	325	17	14	0	51	41	2	195	194	94	32	11
Bacteria	Actinobacteria	Actinomycetia	Micrococcales	Micrococcaceae	Arthrobacter	Arthrobacter sp. NCCP-1664	22	81	0	19	111	242	49	66	25	156	40	174	209	139	16	78	63
Bacteria	Actinobacteria	Actinomycetia	Micrococcales	Micrococcaceae	Arthrobacter	Arthrobacter sp. NEAU-SA2	0	38	0	0	10	2	3	19	11	0	0	10	54	135	20	13	0
Bacteria	Actinobacteria	Actinomycetia	Micrococcales	Micrococcaceae	Arthrobacter	Arthrobacter sp. NEB 688	12	56	2	97	59	166	37	32	333	236	33	123	332	262	131	60	258
Bacteria	Actinobacteria	Actinomycetia	Micrococcales	Micrococcaceae	Arthrobacter	Arthrobacter sp. ok362	0	37	0	55	1	38	28	1	20	42	28	32	105	13	28	20	7
Bacteria	Actinobacteria	Actinomycetia	Micrococcales	Micrococcaceae	Arthrobacter	Arthrobacter sp. ok909	16	9	2	34	24	27	13	17	0	34	42	12	112	115	1	6	9
Bacteria	Actinobacteria	Actinomycetia	Micrococcales	Micrococcaceae	Arthrobacter	Arthrobacter sp. ov118	7	22	1	1	14	33	0	0	0	50	15	28	68	2	32	17	203
Bacteria	Actinobacteria	Actinomycetia	Micrococcales	Micrococcaceae	Arthrobacter	Arthrobacter sp. ov407	25	9	2	0	29	28	12	0	0	66	10	80	99	110	71	3	20
Bacteria	Actinobacteria	Actinomycetia	Micrococcales	Micrococcaceae	Arthrobacter	Arthrobacter sp. OY3WO11	15	27	0	16	16	1	8	2	0	15	5	0	21	31	2	18	0
Bacteria	Actinobacteria	Actinomycetia	Micrococcales	Micrococcaceae	Arthrobacter	Arthrobacter sp. PAMC 25486	36	76	2	25	25	45	23	1	23	43	18	17	15	145	43	23	34
Bacteria	Actinobacteria	Actinomycetia	Micrococcales	Micrococcaceae	Arthrobacter	Arthrobacter sp. PAMC25564	64	14	0	0	8	17	13	20	12	33	39	12	94	104	3	40	5
Bacteria	Actinobacteria	Actinomycetia	Micrococcales	Micrococcaceae	Arthrobacter	Arthrobacter sp. PGP41	0	3	3	0	0	0	7	0	15	20	0	0	15	21	28	11	10
Bacteria	Actinobacteria	Actinomycetia	Micrococcales	Micrococcaceae	Arthrobacter	Arthrobacter sp. PM3	0	32	0	24	0	18	4	8	26	24	49	19	68	4	82	2	30
Bacteria	Actinobacteria	Actinomycetia	Micrococcales	Micrococcaceae	Arthrobacter	Arthrobacter sp. QXT-31	19	30	0	0	0	33	20	0	21	20	0	0	37	10	52	1	1
Bacteria	Actinobacteria	Actinomycetia	Micrococcales	Micrococcaceae	Arthrobacter	Arthrobacter sp. RC1.1 241	0	20	0	43	0	1	4	23	8	32	19	0	106	11	7	19	20
Bacteria	Actinobacteria	Actinomycetia	Micrococcales	Micrococcaceae	Arthrobacter	Arthrobacter sp. REN12	51	22	0	3	0	120	3	25	16	32	0	0	208	298	0	20	32
Bacteria	Actinobacteria	Actinomycetia	Micrococcales	Micrococcaceae	Arthrobacter	Arthrobacter sp. RIT-PI-e	17	42	0	55	52	41	15	11	0	66	47	0	111	38	56	31	67
Bacteria	Actinobacteria	Actinomycetia	Micrococcales	Micrococcaceae	Arthrobacter	Arthrobacter sp. RT-1	0	36	0	8	0	135	0	0	34	89	0	52	24	10	17	6	21
Bacteria	Actinobacteria	Actinomycetia	Micrococcales	Micrococcaceae	Arthrobacter	Arthrobacter sp. Rue61a	0	0	0	0	0	4	0	0	19	14	0	0	24	1	0	16	42
Bacteria	Actinobacteria	Actinomycetia	Micrococcales	Micrococcaceae	Arthrobacter	Arthrobacter sp. S39	0	24	0	80	23	28	11	0	0	29	3	0	63	141	71	20	26
Bacteria	Actinobacteria	Actinomycetia	Micrococcales	Micrococcaceae	Arthrobacter	Arthrobacter sp. Sa2BUA2	201	58	145	89	62	17	589	409	25	77	6	23	21	22	20	39	38
Bacteria	Actinobacteria	Actinomycetia	Micrococcales	Micrococcaceae	Arthrobacter	Arthrobacter sp. Sa2CUA1	19	5	0	8	0	43	11	9	21	2	94	52	9	37	1	3	8
Bacteria	Actinobacteria	Actinomycetia	Micrococcales	Micrococcaceae	Arthrobacter	Arthrobacter sp. SDTb3-6	16	76	1	31	0	89	1	0	29	51	37	0	71	21	38	38	9
Bacteria	Actinobacteria	Actinomycetia	Micrococcales	Micrococcaceae	Arthrobacter	Arthrobacter sp. SF27	0	8	4	18	54	71	3	24	3	28	41	1	85	39	79	1	17
Bacteria	Actinobacteria	Actinomycetia	Micrococcales	Micrococcaceae	Arthrobacter	Arthrobacter sp. SLBN-100	7	79	0	11	2	40	26	13	13	72	32	1	172	249	78	1	23
Bacteria	Actinobacteria	Actinomycetia	Micrococcales	Micrococcaceae	Arthrobacter	Arthrobacter sp. SLBN-112	19	20	0	1	0	0	0	0	0	17	0	0	0	81	0	3	29
Bacteria	Actinobacteria	Actinomycetia	Micrococcales	Micrococcaceae	Arthrobacter	Arthrobacter sp. SLBN-122	17	9	0	20	6	2	13	12	0	34	7	24	24	33	0	7	2
Bacteria	Actinobacteria	Actinomycetia	Micrococcales	Micrococcaceae	Arthrobacter	Arthrobacter sp. SLBN-179	0	0	0	0	1	382	0	0	27	50	0	17	152	232	2	24	0
Bacteria	Actinobacteria	Actinomycetia	Micrococcales	Micrococcaceae	Arthrobacter	Arthrobacter sp. SLBN-53	77	262	1	199	88	231	54	74	88	488	87	175	479	107	127	119	70
Bacteria	Actinobacteria	Actinomycetia	Micrococcales	Micrococcaceae	Arthrobacter	Arthrobacter sp. SLBN-83	0	51	1	20	13	552	0	9	0	34	36	61	112	402	43	5	63
Bacteria	Actinobacteria	Actinomycetia	Micrococcales	Micrococcaceae	Arthrobacter	Arthrobacter sp. Soil736	2151	4482	13	3144	1804	3398	1502	1430	2158	7312	1672	2619	5929	2653	4158	4653	4607
Bacteria	Actinobacteria	Actinomycetia	Micrococcales	Micrococcaceae	Arthrobacter	Arthrobacter sp. Soil762	13	27	0	1	48	13	0	1	0	29	0	0	39	36	0	2	16
Bacteria	Actinobacteria	Actinomycetia	Micrococcales	Micrococcaceae	Arthrobacter	Arthrobacter sp. Soil763	8	4	0	25	30	45	18	12	50	72	20	1	66	101	1	22	39
Bacteria	Actinobacteria	Actinomycetia	Micrococcales	Micrococcaceae	Arthrobacter	Arthrobacter sp. Soil782	37	55	0	47	25	72	0	14	0	79	17	1	65	217	142	9	1
Bacteria	Actinobacteria	Actinomycetia	Micrococcales	Micrococcaceae	Arthrobacter	Arthrobacter sp. SPG23	1	44	0	7	23	19	3	0	40	12	3	124	32	12	22	61	4
Bacteria	Actinobacteria	Actinomycetia	Micrococcales	Micrococcaceae	Arthrobacter	Arthrobacter sp. SRS-W-1-2016	18	10	0	63	1	0	10	3	0	17	0	2	48	106	4	8	19
Bacteria	Actinobacteria	Actinomycetia	Micrococcales	Micrococcaceae	Arthrobacter	Arthrobacter sp. SW1	43	20	2	92	19	11	0	9	19	122	7	0	20	87	8	42	77
Bacteria	Actinobacteria	Actinomycetia	Micrococcales	Micrococcaceae	Arthrobacter	Arthrobacter sp. SX1312	51	25	1	34	57	13	26	46	20	141	29	63	127	55	41	62	97
Bacteria	Actinobacteria	Actinomycetia	Micrococcales	Micrococcaceae	Arthrobacter	Arthrobacter sp. TB 23	17	6	0	14	2	20	7	0	26	72	0	25	53	68	97	3	24
Bacteria	Actinobacteria	Actinomycetia	Micrococcales	Micrococcaceae	Arthrobacter	Arthrobacter sp. TB 26	5	40	1	29	0	34	5	6	15	17	9	40	13	0	8	11	34
Bacteria	Actinobacteria	Actinomycetia	Micrococcales	Micrococcaceae	Arthrobacter	Arthrobacter sp. TPD3018	0	23	0	0	0	0	5	4	0	0	0	30	0	0	0	11	96
Bacteria	Actinobacteria	Actinomycetia	Micrococcales	Micrococcaceae	Arthrobacter	Arthrobacter sp. U41	30	78	2	14	17	181	11	2	94	126	52	77	201	241	123	56	29
Bacteria	Actinobacteria	Actinomycetia	Micrococcales	Micrococcaceae	Arthrobacter	Arthrobacter sp. UCD-GKA	2	54	0	0	0	7	5	15	0	33	4	78	43	40	62	28	54
Bacteria	Actinobacteria	Actinomycetia	Micrococcales	Micrococcaceae	Arthrobacter	Arthrobacter sp. UKPF54-2	0	21	0	31	43	0	6	37	0	36	13	34	37	113	3	19	97
Bacteria	Actinobacteria	Actinomycetia	Micrococcales	Micrococcaceae	Arthrobacter	Arthrobacter sp. UNC362MFTsu5.1	3	14	0	0	65	11	0	21	0	21	36	0	154	85	1	7	43
Bacteria	Actinobacteria	Actinomycetia	Micrococcales	Micrococcaceae	Arthrobacter	Arthrobacter sp. UNCCL28	0	28	0	0	0	0	1	22	40	13	1	0	50	1	15	8	0
Bacteria	Actinobacteria	Actinomycetia	Micrococcales	Micrococcaceae	Arthrobacter	Arthrobacter sp. Y81	12	17	1	1	49	52	22	1	6	31	1	0	2	97	28	7	3
Bacteria	Actinobacteria	Actinomycetia	Micrococcales	Micrococcaceae	Arthrobacter	Arthrobacter sp. YN	41	10	4	31	24	19	1	25	49	37	2	12	50	25	20	14	2
Bacteria	Actinobacteria	Actinomycetia	Micrococcales	Micrococcaceae	Arthrobacter	Arthrobacter sp. yr096	0	42	0	0	0	20	0	0	0	14	0	0	52	0	0	15	0
Bacteria	Actinobacteria	Actinomycetia	Micrococcales	Micrococcaceae	Arthrobacter	Arthrobacter sp. ZBG10	0	4	0	0	0	0	0	0	0	10	0	0	0	1	21	5	1
Bacteria	Actinobacteria	Actinomycetia	Micrococcales	Micrococcaceae	Arthrobacter	Arthrobacter sp. ZGTC131	16	20	0	56	30	13	9	0	29	24	7	60	76	35	2	22	2
Bacteria	Actinobacteria	Actinomycetia	Micrococcales	Micrococcaceae	Arthrobacter	Arthrobacter sp. ZXY-2	0	14	0	0	0	0	0	4	0	2	0	8	1	2	0	8	0
Bacteria	Actinobacteria	Actinomycetia	Micrococcales	Micrococcaceae	Arthrobacter	Arthrobacter sp.	0	11	0	28	20	0	1	0	0	1	17	0	25	80	0	5	0
Bacteria	Actinobacteria	Actinomycetia	Micrococcales	Micrococcaceae	Arthrobacter	Arthrobacter stackebrandtii	9	50	3	20	35	34	14	21	38	146	46	80	86	136	55	95	115
Bacteria	Actinobacteria	Actinomycetia	Micrococcales	Micrococcaceae	Arthrobacter	Arthrobacter subterraneus	1	47	0	31	39	136	11	0	19	11	27	0	85	325	32	33	56
Bacteria	Actinobacteria	Actinomycetia	Micrococcales	Micrococcaceae	Arthrobacter	Arthrobacter terricola	35	95	0	2	0	250	20	28	0	114	45	1	155	116	143	16	40
Bacteria	Actinobacteria	Actinomycetia	Micrococcales	Micrococcaceae	Arthrobacter	Arthrobacter ulcerisalmonis	13	49	0	21	1	32	0	0	1	120	14	0	28	28	4	15	70
Bacteria	Actinobacteria	Actinomycetia	Micrococcales	Micrococcaceae	Arthrobacter	Arthrobacter woluwensis	51	78	2	0	27	44	20	11	35	126	15	1	224	455	121	63	130
Bacteria	Actinobacteria	Actinomycetia	Micrococcales	Micrococcaceae	Arthrobacter	uncultured Arthrobacter sp.	45	1	1	1	85	13	7	0	37	40	7	4	30	183	50	32	1
Bacteria	Actinobacteria	Actinomycetia	Micrococcales	Micrococcaceae	Kocuria	Kocuria carniphila	167	367	1	318	188	306	93	77	235	524	116	272	645	358	517	167	273
Bacteria	Actinobacteria	Actinomycetia	Micrococcales	Micrococcaceae	Kocuria	Kocuria coralli	33	55	0	68	89	139	42	0	4	150	21	137	112	126	100	47	115
Bacteria	Actinobacteria	Actinomycetia	Micrococcales	Micrococcaceae	Kocuria	Kocuria dechangensis	25	154	1	112	12	258	26	37	48	176	20	76	430	537	88	75	139
Bacteria	Actinobacteria	Actinomycetia	Micrococcales	Micrococcaceae	Kocuria	Kocuria flava	56	100	1	58	17	129	7	20	90	202	66	23	314	309	102	33	184
Bacteria	Actinobacteria	Actinomycetia	Micrococcales	Micrococcaceae	Kocuria	Kocuria indica	142	101	0	160	93	112	18	42	89	509	122	115	405	360	151	57	233
Bacteria	Actinobacteria	Actinomycetia	Micrococcales	Micrococcaceae	Kocuria	Kocuria marina	12	46	0	0	22	21	9	0	1	44	30	0	45	57	9	15	14
Bacteria	Actinobacteria	Actinomycetia	Micrococcales	Micrococcaceae	Kocuria	Kocuria massiliensis	0	0	0	0	0	1	0	0	0	0	0	1	13	99	0	6	0
Bacteria	Actinobacteria	Actinomycetia	Micrococcales	Micrococcaceae	Kocuria	Kocuria palustris	3205	5736	11	4484	2868	6094	1803	2291	4572	12272	2214	4880	9100	3601	5383	4363	8000
Bacteria	Actinobacteria	Actinomycetia	Micrococcales	Micrococcaceae	Kocuria	Kocuria polaris	39	121	0	47	53	65	20	0	14	128	13	46	191	147	230	24	245
Bacteria	Actinobacteria	Actinomycetia	Micrococcales	Micrococcaceae	Kocuria	Kocuria rhizophila	674	1105	21	1016	1225	1093	312	603	1043	1401	481	532	2145	821	1305	540	1281
Bacteria	Actinobacteria	Actinomycetia	Micrococcales	Micrococcaceae	Kocuria	Kocuria rosea	45	285	1	100	111	183	41	69	94	138	22	46	407	189	218	53	111
Bacteria	Actinobacteria	Actinomycetia	Micrococcales	Micrococcaceae	Kocuria	Kocuria salina	1	35	1	16	33	0	10	1	0	24	4	7	17	20	0	5	72
Bacteria	Actinobacteria	Actinomycetia	Micrococcales	Micrococcaceae	Kocuria	Kocuria salsicia	5	53	2	14	62	183	0	42	36	106	202	38	86	43	59	3	38
Bacteria	Actinobacteria	Actinomycetia	Micrococcales	Micrococcaceae	Kocuria	Kocuria sediminis	1	44	1	1	74	16	2	1	46	53	16	28	79	71	33	33	206
Bacteria	Actinobacteria	Actinomycetia	Micrococcales	Micrococcaceae	Kocuria	Kocuria soli	22	16	0	36	23	137	1	0	3	93	38	39	91	253	21	43	329
Bacteria	Actinobacteria	Actinomycetia	Micrococcales	Micrococcaceae	Kocuria	Kocuria sp. 2SI	29	351	0	166	159	237	32	37	49	647	91	147	482	48	198	133	314
Bacteria	Actinobacteria	Actinomycetia	Micrococcales	Micrococcaceae	Kocuria	Kocuria sp. 36	1	28	1	20	8	11	7	9	42	0	0	0	5	34	72	6	0
Bacteria	Actinobacteria	Actinomycetia	Micrococcales	Micrococcaceae	Kocuria	Kocuria sp. CNJ-770	25	39	1	0	11	4	12	1	2	38	9	0	85	65	22	10	53
Bacteria	Actinobacteria	Actinomycetia	Micrococcales	Micrococcaceae	Kocuria	Kocuria sp. ICS0012	22	4	0	39	0	0	5	2	23	16	4	0	24	57	18	6	20
Bacteria	Actinobacteria	Actinomycetia	Micrococcales	Micrococcaceae	Kocuria	Kocuria sp. JC486	28	26	1	37	15	166	3	26	24	52	22	0	19	1	9	3	218
Bacteria	Actinobacteria	Actinomycetia	Micrococcales	Micrococcaceae	Kocuria	Kocuria sp. OV113	35	14	0	39	39	15	1	0	16	38	11	0	60	24	0	7	46
Bacteria	Actinobacteria	Actinomycetia	Micrococcales	Micrococcaceae	Kocuria	Kocuria sp. SM24M-10	0	53	0	4	40	96	7	2	0	51	9	1	18	23	1	32	40
Bacteria	Actinobacteria	Actinomycetia	Micrococcales	Micrococcaceae	Kocuria	Kocuria sp. TGY1120_3	34	296	0	154	60	42	28	8	20	474	79	26	347	61	128	56	191
Bacteria	Actinobacteria	Actinomycetia	Micrococcales	Micrococcaceae	Kocuria	Kocuria sp. WN036	0	42	0	0	0	0	10	7	54	0	0	0	43	28	0	20	0
Bacteria	Actinobacteria	Actinomycetia	Micrococcales	Micrococcaceae	Kocuria	Kocuria sp. WRN011	235	378	0	232	165	217	41	133	201	322	284	388	565	377	344	68	572
Bacteria	Actinobacteria	Actinomycetia	Micrococcales	Micrococcaceae	Kocuria	Kocuria sp. ZOR0020	0	36	1	19	0	28	0	15	0	29	0	1	107	162	2	1	0
Bacteria	Actinobacteria	Actinomycetia	Micrococcales	Micrococcaceae	Kocuria	Kocuria subflava	18	4	0	1	5	4	4	44	0	36	0	33	22	26	0	5	0
Bacteria	Actinobacteria	Actinomycetia	Micrococcales	Micrococcaceae	Kocuria	Kocuria turfanensis	44	58	2	68	48	67	16	40	65	109	11	47	120	64	102	20	144
Bacteria	Actinobacteria	Actinomycetia	Micrococcales	Micrococcaceae	Kocuria	Kocuria tytonicola	10	59	0	15	25	45	16	35	0	97	2	1	42	2	48	48	7
Bacteria	Actinobacteria	Actinomycetia	Micrococcales	Micrococcaceae	Kocuria	Kocuria tytonis	0	13	0	28	24	22	1	1	34	59	1	28	95	40	77	40	5
Bacteria	Actinobacteria	Actinomycetia	Micrococcales	Micrococcaceae	Kocuria	Kocuria varians	50	139	1	42	120	84	23	34	15	142	48	183	152	173	51	58	148
Bacteria	Actinobacteria	Actinomycetia	Micrococcales	Micrococcaceae	Micrococcus	Micrococcus aloeverae	15	227	0	269	98	72	45	27	40	358	20	72	343	71	140	86	88
Bacteria	Actinobacteria	Actinomycetia	Micrococcales	Micrococcaceae	Micrococcus	Micrococcus cohnii	0	13	0	0	0	4	1	0	78	28	0	68	21	47	2	14	81
Bacteria	Actinobacteria	Actinomycetia	Micrococcales	Micrococcaceae	Micrococcus	Micrococcus endophyticus	25	35	0	68	45	169	0	3	1	45	59	0	66	35	135	14	212
Bacteria	Actinobacteria	Actinomycetia	Micrococcales	Micrococcaceae	Micrococcus	Micrococcus flavus	57	181	0	506	1042	1720	38	42	118	342	225	40	621	648	255	54	1847
Bacteria	Actinobacteria	Actinomycetia	Micrococcales	Micrococcaceae	Micrococcus	Micrococcus luteus	2543	15193	9	15786	4013	6951	1775	1892	3988	19492	4023	3918	25268	5250	5643	4034	7051
Bacteria	Actinobacteria	Actinomycetia	Micrococcales	Micrococcaceae	Micrococcus	Micrococcus lylae	16	97	0	42	42	131	31	26	30	172	62	49	152	98	127	57	276
Bacteria	Actinobacteria	Actinomycetia	Micrococcales	Micrococcaceae	Micrococcus	Micrococcus sp. 116	72	866	1	826	214	210	82	59	141	1239	238	234	1416	308	265	208	357
Bacteria	Actinobacteria	Actinomycetia	Micrococcales	Micrococcaceae	Micrococcus	Micrococcus sp. 28	36	327	0	135	52	135	22	29	32	314	79	26	560	90	124	37	116
Bacteria	Actinobacteria	Actinomycetia	Micrococcales	Micrococcaceae	Micrococcus	Micrococcus sp. 80W	0	0	0	0	0	0	0	0	0	0	0	0	0	0	0	13	0
Bacteria	Actinobacteria	Actinomycetia	Micrococcales	Micrococcaceae	Micrococcus	Micrococcus sp. A1	48	20	0	28	17	0	0	9	0	49	0	0	20	21	25	18	0
Bacteria	Actinobacteria	Actinomycetia	Micrococcales	Micrococcaceae	Micrococcus	Micrococcus sp. A7	9	18	0	0	0	0	5	19	0	17	0	0	29	45	0	6	41
Bacteria	Actinobacteria	Actinomycetia	Micrococcales	Micrococcaceae	Micrococcus	Micrococcus sp. Alg238-R198	0	8	0	21	0	26	0	0	0	8	0	0	34	0	0	11	0
Bacteria	Actinobacteria	Actinomycetia	Micrococcales	Micrococcaceae	Micrococcus	Micrococcus sp. CH7	0	38	0	20	32	3	5	19	1	51	0	0	27	5	1	1	52
Bacteria	Actinobacteria	Actinomycetia	Micrococcales	Micrococcaceae	Micrococcus	Micrococcus sp. FDAARGOS_333	113	82	0	86	110	73	8	45	15	160	80	35	122	94	109	50	108
Bacteria	Actinobacteria	Actinomycetia	Micrococcales	Micrococcaceae	Micrococcus	Micrococcus sp. HMSC30C05	0	19	0	87	33	0	0	36	0	76	33	29	62	11	0	15	0
Bacteria	Actinobacteria	Actinomycetia	Micrococcales	Micrococcaceae	Micrococcus	Micrococcus sp. HSID17227	0	48	0	185	50	77	10	0	36	54	15	1	167	2	0	4	0
Bacteria	Actinobacteria	Actinomycetia	Micrococcales	Micrococcaceae	Micrococcus	Micrococcus sp. HSID17228	0	8	0	12	0	0	0	0	15	24	5	0	32	0	1	7	7
Bacteria	Actinobacteria	Actinomycetia	Micrococcales	Micrococcaceae	Micrococcus	Micrococcus sp. HSID17245	2	40	0	26	0	37	5	9	1	67	19	0	74	1	1	33	2
Bacteria	Actinobacteria	Actinomycetia	Micrococcales	Micrococcaceae	Micrococcus	Micrococcus sp. KT16	14	73	0	238	0	31	0	8	17	196	0	209	295	25	56	33	59
Bacteria	Actinobacteria	Actinomycetia	Micrococcales	Micrococcaceae	Micrococcus	Micrococcus sp. MS-ASIII-49	0	11	0	3	45	0	0	0	3	1	0	0	3	0	0	12	8
Bacteria	Actinobacteria	Actinomycetia	Micrococcales	Micrococcaceae	Micrococcus	Micrococcus sp. R8502A1	17	56	0	126	0	48	10	0	47	33	3	102	82	44	0	26	87
Bacteria	Actinobacteria	Actinomycetia	Micrococcales	Micrococcaceae	Micrococcus	Micrococcus sp. RIT608	16	41	0	41	0	0	1	1	2	45	0	0	70	0	77	1	10
Bacteria	Actinobacteria	Actinomycetia	Micrococcales	Micrococcaceae	Micrococcus	Micrococcus sp. TA1	22	18	0	31	14	532	1	0	1	26	15	104	40	292	6	16	52
Bacteria	Actinobacteria	Actinomycetia	Micrococcales	Micrococcaceae	Micrococcus	Micrococcus sp. V7	15	23	2	0	14	0	0	0	1	104	19	0	65	0	1	16	0
Bacteria	Actinobacteria	Actinomycetia	Micrococcales	Micrococcaceae	Micrococcus	Micrococcus terreus	68	165	9	400	241	1043	71	36	116	260	81	133	493	384	95	68	688
Bacteria	Actinobacteria	Actinomycetia	Micrococcales	Micrococcaceae	Micrococcus	Micrococcus yunnanensis	1	256	0	273	10	156	29	30	55	356	93	154	484	173	136	27	137
Bacteria	Actinobacteria	Actinomycetia	Micrococcales	Micrococcaceae	Nesterenkonia	Nesterenkonia alba	1	22	2	17	14	80	2	21	34	14	28	1	38	126	8	42	117
Bacteria	Actinobacteria	Actinomycetia	Micrococcales	Micrococcaceae	Nesterenkonia	Nesterenkonia alkaliphila	34	58	0	38	87	168	1	38	22	155	27	77	190	180	157	66	176
Bacteria	Actinobacteria	Actinomycetia	Micrococcales	Micrococcaceae	Nesterenkonia	Nesterenkonia cremea	133	362	0	181	172	2597	99	140	294	673	275	315	584	447	234	262	471
Bacteria	Actinobacteria	Actinomycetia	Micrococcales	Micrococcaceae	Nesterenkonia	Nesterenkonia halophila	0	2	0	19	3	28	0	0	0	0	12	1	20	39	38	1	6
Bacteria	Actinobacteria	Actinomycetia	Micrococcales	Micrococcaceae	Nesterenkonia	Nesterenkonia halotolerans	26	63	0	0	0	49	1	15	52	163	13	9	106	120	39	22	62
Bacteria	Actinobacteria	Actinomycetia	Micrococcales	Micrococcaceae	Nesterenkonia	Nesterenkonia jeotgali	0	12	0	54	26	11	13	0	0	1	31	12	11	0	0	1	1
Bacteria	Actinobacteria	Actinomycetia	Micrococcales	Micrococcaceae	Nesterenkonia	Nesterenkonia lutea	3	42	0	16	12	68	5	1	31	82	5	0	73	381	116	37	132
Bacteria	Actinobacteria	Actinomycetia	Micrococcales	Micrococcaceae	Nesterenkonia	Nesterenkonia massiliensis	10	90	0	1	79	154	0	1	0	110	51	0	143	106	55	47	103
Bacteria	Actinobacteria	Actinomycetia	Micrococcales	Micrococcaceae	Nesterenkonia	Nesterenkonia muleiensis	41	33	0	0	25	221	21	43	12	38	34	1	119	135	62	38	156
Bacteria	Actinobacteria	Actinomycetia	Micrococcales	Micrococcaceae	Nesterenkonia	Nesterenkonia natronophila	181	395	10	235	124	382	102	103	169	407	151	99	424	214	403	392	397
Bacteria	Actinobacteria	Actinomycetia	Micrococcales	Micrococcaceae	Nesterenkonia	Nesterenkonia populi	1	30	0	0	9	20	15	10	41	39	13	24	154	127	0	16	71
Bacteria	Actinobacteria	Actinomycetia	Micrococcales	Micrococcaceae	Nesterenkonia	Nesterenkonia salmonea	1	41	2	43	5	184	17	0	22	20	1	68	39	44	66	5	21
Bacteria	Actinobacteria	Actinomycetia	Micrococcales	Micrococcaceae	Nesterenkonia	Nesterenkonia sandarakina	17	37	0	28	18	38	7	31	43	17	72	20	121	53	33	20	23
Bacteria	Actinobacteria	Actinomycetia	Micrococcales	Micrococcaceae	Nesterenkonia	Nesterenkonia sp. CPCC 204709	0	0	0	0	0	0	0	0	0	10	0	0	30	1	6	19	1
Bacteria	Actinobacteria	Actinomycetia	Micrococcales	Micrococcaceae	Nesterenkonia	Nesterenkonia sp. F	9	60	0	64	75	133	13	28	28	40	0	12	84	83	110	24	62
Bacteria	Actinobacteria	Actinomycetia	Micrococcales	Micrococcaceae	Nesterenkonia	Nesterenkonia sp. Hz 6-5	1	6	0	31	0	126	4	27	1	15	6	1	66	22	35	2	0
Bacteria	Actinobacteria	Actinomycetia	Micrococcales	Micrococcaceae	Nesterenkonia	Nesterenkonia sp. MD2	28	50	0	8	28	188	7	29	53	50	12	157	172	326	74	63	46
Bacteria	Actinobacteria	Actinomycetia	Micrococcales	Micrococcaceae	Nesterenkonia	Nesterenkonia sp. MY13	17	107	1	7	0	428	13	8	57	145	51	29	190	139	47	23	65
Bacteria	Actinobacteria	Actinomycetia	Micrococcales	Micrococcaceae	Nesterenkonia	Nesterenkonia sp. NBAIMH1	13	23	2	96	37	141	20	0	7	45	4	1	35	69	62	39	29
Bacteria	Actinobacteria	Actinomycetia	Micrococcales	Micrococcaceae	Nesterenkonia	Nesterenkonia sp. PF2B19	58	30	3	27	73	61	2	0	68	55	28	23	81	56	201	49	65
Bacteria	Actinobacteria	Actinomycetia	Micrococcales	Micrococcaceae	Nesterenkonia	Nesterenkonia sphaerica	11	10	1	16	15	142	5	0	0	52	11	32	219	685	20	32	47
Bacteria	Actinobacteria	Actinomycetia	Micrococcales	Micrococcaceae	Nesterenkonia	Nesterenkonia xinjiangensis	5	38	4	68	90	171	24	15	15	185	37	20	222	85	132	32	128
Bacteria	Actinobacteria	Actinomycetia	Micrococcales	Micrococcaceae	Rothia	Rothia aeria	361	1622	3	1099	290	675	256	609	659	5227	519	723	2820	2688	1439	787	1403
Bacteria	Actinobacteria	Actinomycetia	Micrococcales	Micrococcaceae	Rothia	Rothia amarae	29	0	0	0	0	55	0	0	0	10	11	0	17	33	0	28	49
Bacteria	Actinobacteria	Actinomycetia	Micrococcales	Micrococcaceae	Rothia	Rothia dentocariosa	162	624	0	496	181	1131	88	477	228	2078	258	439	1130	1640	501	343	418
Bacteria	Actinobacteria	Actinomycetia	Micrococcales	Micrococcaceae	Rothia	Rothia halotolerans	15	44	0	23	1	18	14	39	67	120	26	12	70	70	20	88	105
Bacteria	Actinobacteria	Actinomycetia	Micrococcales	Micrococcaceae	Rothia	Rothia koreensis	21	40	0	1	1	2	0	28	0	38	54	0	12	10	11	26	0
Bacteria	Actinobacteria	Actinomycetia	Micrococcales	Micrococcaceae	Rothia	Rothia kristinae	71	163	2	121	152	395	43	13	42	341	36	99	394	479	53	119	199
Bacteria	Actinobacteria	Actinomycetia	Micrococcales	Micrococcaceae	Rothia	Rothia mucilaginosa	163	704	2	445	281	840	222	142	283	1511	308	310	1277	575	673	449	270
Bacteria	Actinobacteria	Actinomycetia	Micrococcales	Micrococcaceae	Rothia	Rothia nasimurium	49	38	1	1	29	123	12	9	11	77	8	1	93	114	87	47	69
Bacteria	Actinobacteria	Actinomycetia	Micrococcales	Micrococcaceae	Rothia	Rothia sp. HMSC058E10	42	16	0	0	18	0	2	11	0	62	0	0	32	6	49	13	1
Bacteria	Actinobacteria	Actinomycetia	Micrococcales	Micrococcaceae	Rothia	Rothia sp. HMSC061D12	0	0	0	0	0	0	11	1	2	12	19	0	51	34	0	8	25
Bacteria	Actinobacteria	Actinomycetia	Micrococcales	Micrococcaceae	Rothia	Rothia sp. HMSC061E04	14	3	0	40	0	14	0	8	0	30	8	0	0	0	17	9	9
Bacteria	Actinobacteria	Actinomycetia	Micrococcales	Micrococcaceae	Rothia	Rothia sp. HMSC062F03	0	13	0	1	38	0	2	0	0	20	0	0	0	0	4	7	51
Bacteria	Actinobacteria	Actinomycetia	Micrococcales	Micrococcaceae	Rothia	Rothia sp. HMSC064D08	17	15	0	0	0	2	22	28	0	54	0	0	45	14	0	25	17
Bacteria	Actinobacteria	Actinomycetia	Micrococcales	Micrococcaceae	Rothia	Rothia sp. HMSC064F07	0	12	0	2	0	52	0	20	17	1	0	1	10	0	1	16	0
Bacteria	Actinobacteria	Actinomycetia	Micrococcales	Micrococcaceae	Rothia	Rothia sp. HMSC065B04	0	13	0	1	0	5	3	5	5	61	0	0	24	0	15	30	6
Bacteria	Actinobacteria	Actinomycetia	Micrococcales	Micrococcaceae	Rothia	Rothia sp. HMSC065C03	0	20	0	0	8	0	12	0	4	44	4	38	39	15	0	6	0
Bacteria	Actinobacteria	Actinomycetia	Micrococcales	Micrococcaceae	Rothia	Rothia sp. HMSC065C12	0	4	0	6	11	16	0	5	4	9	0	0	20	9	0	9	111
Bacteria	Actinobacteria	Actinomycetia	Micrococcales	Micrococcaceae	Rothia	Rothia sp. HMSC065G12	0	27	0	21	0	0	8	9	0	30	0	0	5	90	0	23	0
Bacteria	Actinobacteria	Actinomycetia	Micrococcales	Micrococcaceae	Rothia	Rothia sp. HMSC067H10	29	60	0	16	30	23	34	61	0	124	11	126	77	47	44	40	45
Bacteria	Actinobacteria	Actinomycetia	Micrococcales	Micrococcaceae	Rothia	Rothia sp. HMSC069C03	0	3	0	0	57	0	0	0	0	0	1	18	15	0	21	3	0
Bacteria	Actinobacteria	Actinomycetia	Micrococcales	Micrococcaceae	Rothia	Rothia sp. HMSC069C04	0	0	0	0	0	0	1	0	0	13	0	0	0	9	0	4	0
Bacteria	Actinobacteria	Actinomycetia	Micrococcales	Micrococcaceae	Rothia	Rothia sp. HMSC069C10	0	15	0	0	0	0	0	0	0	8	0	0	6	0	0	1	34
Bacteria	Actinobacteria	Actinomycetia	Micrococcales	Micrococcaceae	Rothia	Rothia sp. HMSC071F11	0	24	0	15	0	10	10	0	1	97	18	27	29	15	0	22	0
Bacteria	Actinobacteria	Actinomycetia	Micrococcales	Micrococcaceae	Rothia	Rothia sp. HMSC072B03	0	0	0	0	0	0	0	0	0	0	0	0	1	0	0	20	18
Bacteria	Actinobacteria	Actinomycetia	Micrococcales	Micrococcaceae	Rothia	Rothia sp. HMSC072B04	0	16	0	0	1	1	11	0	1	37	33	0	10	0	0	3	0
Bacteria	Actinobacteria	Actinomycetia	Micrococcales	Micrococcaceae	Rothia	Rothia sp. HMSC073B08	0	18	0	25	0	36	0	4	0	69	0	7	20	32	8	21	27
Bacteria	Actinobacteria	Actinomycetia	Micrococcales	Micrococcaceae	Rothia	Rothia sp. HMSC078H08	5	44	0	0	17	0	0	0	26	26	0	27	19	0	0	1	0
Bacteria	Actinobacteria	Actinomycetia	Micrococcales	Micrococcaceae	Rothia	Rothia sp. HMSC08A08	12	0	0	12	0	16	0	0	45	72	24	0	13	0	20	8	0
Bacteria	Actinobacteria	Actinomycetia	Micrococcales	Micrococcaceae	Rothia	Rothia sp. HSID18067	40	103	0	95	30	78	37	83	17	311	31	39	221	216	57	93	113
Bacteria	Actinobacteria	Actinomycetia	Micrococcales	Micrococcaceae	Rothia	Rothia sp. HSID18069	0	103	0	17	11	28	10	37	51	265	11	37	95	183	12	27	23
Bacteria	Actinobacteria	Actinomycetia	Micrococcales	Micrococcaceae	Rothia	Rothia sp. Olga	80	155	3	67	87	146	25	21	58	486	18	87	223	227	71	84	26
Bacteria	Actinobacteria	Actinomycetia	Micrococcales	Micrococcaceae	Rothia	Rothia terrae	0	37	0	53	1	10	0	14	17	14	19	0	74	124	32	8	110
Bacteria	Actinobacteria	Actinomycetia	Micrococcales	Ornithinimicrobiaceae	Serinicoccus	Serinicoccus chungangensis	29	181	9	40	41	167	21	23	83	204	44	23	204	260	130	66	321
Bacteria	Actinobacteria	Actinomycetia	Micrococcales	Ornithinimicrobiaceae	Serinicoccus	Serinicoccus hydrothermalis	31	92	3	0	83	136	6	85	51	58	28	1	218	112	116	35	231
Bacteria	Actinobacteria	Actinomycetia	Micrococcales	Ornithinimicrobiaceae	Serinicoccus	Serinicoccus profundi	34	158	0	75	25	122	15	34	16	162	56	34	256	63	135	51	62
Bacteria	Actinobacteria	Actinomycetia	Micrococcales	Ornithinimicrobiaceae	Serinicoccus	Serinicoccus sediminis	26	85	2	21	19	163	16	6	67	92	39	16	201	189	101	44	106
Bacteria	Actinobacteria	Actinomycetia	Micrococcales	Ornithinimicrobiaceae	Serinicoccus	Serinicoccus sp. CUA-874	28	35	1	20	39	89	9	15	37	90	0	25	40	123	17	5	96
Bacteria	Actinobacteria	Actinomycetia	Micrococcales	Ornithinimicrobiaceae	Serinicoccus	Serinicoccus sp. P2D13	35	66	3	38	65	98	31	17	39	136	16	59	274	312	62	66	239
Bacteria	Actinobacteria	Actinomycetia	Micrococcales	Promicromonosporaceae	Isoptericola	Isoptericola chiayiensis	1	41	2	19	21	48	18	10	25	129	12	16	98	178	55	31	60
Bacteria	Actinobacteria	Actinomycetia	Micrococcales	Promicromonosporaceae	Isoptericola	Isoptericola cucumis	570	1777	18	1377	508	1103	405	469	694	1877	737	582	2493	1571	1621	697	1716
Bacteria	Actinobacteria	Actinomycetia	Micrococcales	Promicromonosporaceae	Isoptericola	Isoptericola dokdonensis	9	18	1	23	23	34	17	44	14	87	52	1	171	122	5	23	19
Bacteria	Actinobacteria	Actinomycetia	Micrococcales	Promicromonosporaceae	Isoptericola	Isoptericola halotolerans	53	93	1	93	48	31	25	9	17	124	41	5	231	264	85	70	188
Bacteria	Actinobacteria	Actinomycetia	Micrococcales	Promicromonosporaceae	Isoptericola	Isoptericola jiangsuensis	12	64	3	20	101	34	17	3	27	119	23	1	61	131	87	70	134
Bacteria	Actinobacteria	Actinomycetia	Micrococcales	Promicromonosporaceae	Isoptericola	Isoptericola sediminis	75	38	3	82	59	27	11	10	33	71	0	49	129	406	136	40	181
Bacteria	Actinobacteria	Actinomycetia	Micrococcales	Promicromonosporaceae	Isoptericola	Isoptericola sp. BMS4	56	100	5	26	83	130	30	50	34	122	10	22	174	369	68	99	213
Bacteria	Actinobacteria	Actinomycetia	Micrococcales	Promicromonosporaceae	Isoptericola	Isoptericola sp. TLY-12	43	131	8	1	45	671	31	26	49	120	60	114	173	150	140	59	36
Bacteria	Actinobacteria	Actinomycetia	Micrococcales	Promicromonosporaceae	Isoptericola	Isoptericola variabilis	138	635	0	263	152	418	40	207	186	634	194	241	801	568	354	139	369
Bacteria	Actinobacteria	Actinomycetia	Propionibacteriales	Nocardioidaceae	Aeromicrobium	Aeromicrobium camelliae	22	57	0	57	13	99	0	16	26	23	5	1	94	86	133	27	4
Bacteria	Actinobacteria	Actinomycetia	Propionibacteriales	Nocardioidaceae	Aeromicrobium	Aeromicrobium choanae	45	40	1	88	9	44	7	5	40	5	5	0	156	9	76	45	59
Bacteria	Actinobacteria	Actinomycetia	Propionibacteriales	Nocardioidaceae	Aeromicrobium	Aeromicrobium endophyticum	92	126	2	41	61	126	17	9	0	32	228	87	79	944	90	21	64
Bacteria	Actinobacteria	Actinomycetia	Propionibacteriales	Nocardioidaceae	Aeromicrobium	Aeromicrobium erythreum	13	128	2	68	50	117	0	49	21	199	32	128	215	149	57	50	121
Bacteria	Actinobacteria	Actinomycetia	Propionibacteriales	Nocardioidaceae	Aeromicrobium	Aeromicrobium fastidiosum	32	177	4	0	60	181	14	17	22	148	132	1	174	1329	52	76	40
Bacteria	Actinobacteria	Actinomycetia	Propionibacteriales	Nocardioidaceae	Aeromicrobium	Aeromicrobium flavum	5	95	2	12	76	92	18	2	1	137	26	2	124	130	290	2	181
Bacteria	Actinobacteria	Actinomycetia	Propionibacteriales	Nocardioidaceae	Aeromicrobium	Aeromicrobium ginsengisoli	9	44	15	21	49	34	17	0	1	4	15	3	136	224	3	11	68
Bacteria	Actinobacteria	Actinomycetia	Propionibacteriales	Nocardioidaceae	Aeromicrobium	Aeromicrobium marinum	54	136	5	153	72	205	30	15	48	138	61	6	313	431	58	37	254
Bacteria	Actinobacteria	Actinomycetia	Propionibacteriales	Nocardioidaceae	Aeromicrobium	Aeromicrobium massiliense	2	31	3	40	0	8	13	0	0	19	16	1	107	240	120	27	45
Bacteria	Actinobacteria	Actinomycetia	Propionibacteriales	Nocardioidaceae	Aeromicrobium	Aeromicrobium phoceense	0	35	2	24	0	55	22	5	20	153	50	1	62	40	92	24	39
Bacteria	Actinobacteria	Actinomycetia	Propionibacteriales	Nocardioidaceae	Aeromicrobium	Aeromicrobium phragmitis	13	29	2	5	2	47	12	5	1	107	16	2	67	79	60	23	153
Bacteria	Actinobacteria	Actinomycetia	Propionibacteriales	Nocardioidaceae	Aeromicrobium	Aeromicrobium sp. 9AM	98	248	0	162	148	113	32	65	102	275	183	27	347	679	235	104	182
Bacteria	Actinobacteria	Actinomycetia	Propionibacteriales	Nocardioidaceae	Aeromicrobium	Aeromicrobium sp. A1-2	31	58	6	48	65	23	53	14	74	218	107	48	214	508	53	30	261
Bacteria	Actinobacteria	Actinomycetia	Propionibacteriales	Nocardioidaceae	Aeromicrobium	Aeromicrobium sp. CFBP 8757	0	44	2	10	0	19	9	0	23	83	27	22	99	439	25	13	147
Bacteria	Actinobacteria	Actinomycetia	Propionibacteriales	Nocardioidaceae	Aeromicrobium	Aeromicrobium sp. Co35	17	112	0	68	12	57	24	39	65	146	59	25	205	134	80	95	150
Bacteria	Actinobacteria	Actinomycetia	Propionibacteriales	Nocardioidaceae	Aeromicrobium	Aeromicrobium sp. IC_218	1	26	1	52	29	109	25	4	22	71	15	30	158	40	25	20	112
Bacteria	Actinobacteria	Actinomycetia	Propionibacteriales	Nocardioidaceae	Aeromicrobium	Aeromicrobium sp. Leaf245	9	0	0	2	8	13	0	0	0	26	0	0	0	0	0	12	0
Bacteria	Actinobacteria	Actinomycetia	Propionibacteriales	Nocardioidaceae	Aeromicrobium	Aeromicrobium sp. Leaf272	0	0	0	1	0	0	0	0	0	16	18	0	0	15	1	11	0
Bacteria	Actinobacteria	Actinomycetia	Propionibacteriales	Nocardioidaceae	Aeromicrobium	Aeromicrobium sp. Leaf291	13	9	0	0	1	34	12	0	0	21	0	0	10	0	12	25	32
Bacteria	Actinobacteria	Actinomycetia	Propionibacteriales	Nocardioidaceae	Aeromicrobium	Aeromicrobium sp. MF47	0	3	0	1	0	1	0	1	0	18	0	0	23	65	1	9	0
Bacteria	Actinobacteria	Actinomycetia	Propionibacteriales	Nocardioidaceae	Aeromicrobium	Aeromicrobium sp. OAE604	19	10	1	10	1	201	32	1	0	67	0	16	97	106	90	15	254
Bacteria	Actinobacteria	Actinomycetia	Propionibacteriales	Nocardioidaceae	Aeromicrobium	Aeromicrobium sp. PE09-221	10	79	1	3	21	157	53	17	28	106	17	91	61	365	16	20	97
Bacteria	Actinobacteria	Actinomycetia	Propionibacteriales	Nocardioidaceae	Aeromicrobium	Aeromicrobium sp. Root236	0	32	1	33	46	68	26	26	27	87	57	0	23	280	79	62	224
Bacteria	Actinobacteria	Actinomycetia	Propionibacteriales	Nocardioidaceae	Aeromicrobium	Aeromicrobium sp. Root344	14	52	2	7	55	40	18	8	14	35	21	32	22	277	0	17	59
Bacteria	Actinobacteria	Actinomycetia	Propionibacteriales	Nocardioidaceae	Aeromicrobium	Aeromicrobium sp. Root472D3	1	20	0	13	20	65	3	0	1	37	44	2	37	230	39	8	36
Bacteria	Actinobacteria	Actinomycetia	Propionibacteriales	Nocardioidaceae	Aeromicrobium	Aeromicrobium sp. Root495	0	49	5	1	23	18	3	1	18	91	29	2	89	36	178	53	2
Bacteria	Actinobacteria	Actinomycetia	Propionibacteriales	Nocardioidaceae	Aeromicrobium	Aeromicrobium sp. S22	0	5	0	0	0	0	0	0	0	4	0	0	1	23	0	8	1
Bacteria	Actinobacteria	Actinomycetia	Propionibacteriales	Nocardioidaceae	Aeromicrobium	Aeromicrobium sp. SMF47	0	0	0	0	40	0	0	0	0	1	0	0	0	32	0	1	0
Bacteria	Actinobacteria	Actinomycetia	Propionibacteriales	Nocardioidaceae	Aeromicrobium	Aeromicrobium sp. YC3-14	72	146	1	64	209	527	35	11	30	115	187	1	258	2038	160	28	104
Bacteria	Actinobacteria	Actinomycetia	Propionibacteriales	Nocardioidaceae	Aeromicrobium	Aeromicrobium sp. zg-636	20	7	2	0	0	108	0	0	25	14	0	0	51	82	1	13	2
Bacteria	Actinobacteria	Actinomycetia	Propionibacteriales	Nocardioidaceae	Aeromicrobium	Aeromicrobium sp.	0	0	1	1	16	47	21	8	48	32	20	2	49	55	43	1	49
Bacteria	Actinobacteria	Actinomycetia	Propionibacteriales	Nocardioidaceae	Aeromicrobium	Aeromicrobium tamlense	7	77	7	3	58	193	9	9	17	74	34	3	136	73	19	33	70
Bacteria	Actinobacteria	Actinomycetia	Propionibacteriales	Nocardioidaceae	Aeromicrobium	Aeromicrobium terrae	62	31	1	22	14	12	3	1	20	67	29	87	143	184	162	1	102
Bacteria	Actinobacteria	Actinomycetia	Propionibacteriales	Nocardioidaceae	Friedmanniella	Friedmanniella endophytica	169	543	3	241	209	527	191	70	238	1052	160	214	1193	1185	521	232	463
Bacteria	Actinobacteria	Actinomycetia	Propionibacteriales	Nocardioidaceae	Friedmanniella	Friedmanniella luteola	570	2343	5	993	516	1100	361	413	619	3423	633	802	5852	2131	1141	1001	2982
Bacteria	Actinobacteria	Actinomycetia	Propionibacteriales	Nocardioidaceae	Friedmanniella	uncultured Friedmanniella sp.	270	823	5	293	396	594	187	117	390	1363	255	327	1726	744	604	612	870
Bacteria	Actinobacteria	Actinomycetia	Propionibacteriales	Nocardioidaceae	Marmoricola	Marmoricola aequoreus	310	699	18	263	142	371	324	74	400	732	245	677	912	849	339	163	2171
Bacteria	Actinobacteria	Actinomycetia	Propionibacteriales	Nocardioidaceae	Marmoricola	Marmoricola aurantiacus	68	248	8	180	155	222	96	87	98	595	324	164	457	279	165	132	336
Bacteria	Actinobacteria	Actinomycetia	Propionibacteriales	Nocardioidaceae	Marmoricola	Marmoricola caldifontis	185	488	4	355	175	459	120	126	275	842	209	247	1293	724	491	261	1101
Bacteria	Actinobacteria	Actinomycetia	Propionibacteriales	Nocardioidaceae	Marmoricola	Marmoricola endophyticus	54	95	2	50	110	89	35	71	54	209	32	36	129	405	80	62	211
Bacteria	Actinobacteria	Actinomycetia	Propionibacteriales	Nocardioidaceae	Marmoricola	Marmoricola ginsengisoli	27	88	5	47	185	265	23	28	109	209	56	176	412	484	68	99	443
Bacteria	Actinobacteria	Actinomycetia	Propionibacteriales	Nocardioidaceae	Marmoricola	Marmoricola mangrovicus	106	173	6	203	104	258	31	27	160	209	52	12	340	447	178	64	526
Bacteria	Actinobacteria	Actinomycetia	Propionibacteriales	Nocardioidaceae	Marmoricola	Marmoricola pocheonensis	28	134	6	144	353	328	110	33	73	284	53	184	472	588	585	120	364
Bacteria	Actinobacteria	Actinomycetia	Propionibacteriales	Nocardioidaceae	Marmoricola	Marmoricola scoriae	135	216	4	329	172	214	139	37	98	453	1258	351	619	446	285	176	764
Bacteria	Actinobacteria	Actinomycetia	Propionibacteriales	Nocardioidaceae	Marmoricola	Marmoricola solisilvae	68	159	3	162	226	122	66	26	144	242	62	71	254	570	212	86	288
Bacteria	Actinobacteria	Actinomycetia	Propionibacteriales	Nocardioidaceae	Marmoricola	Marmoricola sp. Leaf446	28	235	0	13	160	190	77	113	75	491	359	69	420	426	43	122	726
Bacteria	Actinobacteria	Actinomycetia	Propionibacteriales	Nocardioidaceae	Marmoricola	Marmoricola sp. URHB0036	166	627	11	273	337	438	286	200	232	1367	253	421	1217	1285	797	303	1266
Bacteria	Actinobacteria	Actinomycetia	Propionibacteriales	Nocardioidaceae	Nocardioides	Nocardioides agariphilus	171	764	13	174	466	470	164	144	299	1229	213	325	896	936	479	388	440
Bacteria	Actinobacteria	Actinomycetia	Propionibacteriales	Nocardioidaceae	Nocardioides	Nocardioides albertanoniae	33	63	1	17	51	108	18	37	45	102	0	3	118	62	102	29	52
Bacteria	Actinobacteria	Actinomycetia	Propionibacteriales	Nocardioidaceae	Nocardioides	Nocardioides albidus	73	37	5	68	39	158	16	18	21	87	17	34	253	571	58	57	121
Bacteria	Actinobacteria	Actinomycetia	Propionibacteriales	Nocardioidaceae	Nocardioides	Nocardioides albus	19	64	1	27	26	87	21	6	0	120	14	26	43	57	34	20	8
Bacteria	Actinobacteria	Actinomycetia	Propionibacteriales	Nocardioidaceae	Nocardioides	Nocardioides alkalitolerans	27	204	3	20	175	382	26	4	16	350	124	87	336	265	134	84	184
Bacteria	Actinobacteria	Actinomycetia	Propionibacteriales	Nocardioidaceae	Nocardioides	Nocardioides allogilvus	18	23	4	1	55	19	8	6	0	16	0	0	53	81	41	20	28
Bacteria	Actinobacteria	Actinomycetia	Propionibacteriales	Nocardioidaceae	Nocardioides	Nocardioides alpinus	192	331	9	100	223	404	124	73	232	414	661	201	427	723	564	177	265
Bacteria	Actinobacteria	Actinomycetia	Propionibacteriales	Nocardioidaceae	Nocardioides	Nocardioides anomalus	97	564	26	301	170	586	182	155	153	1033	136	146	1002	772	379	173	501
Bacteria	Actinobacteria	Actinomycetia	Propionibacteriales	Nocardioidaceae	Nocardioides	Nocardioides aromaticivorans	137	126	86	0	51	47	275	347	36	97	28	5	43	49	87	33	208
Bacteria	Actinobacteria	Actinomycetia	Propionibacteriales	Nocardioidaceae	Nocardioides	Nocardioides baekrokdamisoli	46	130	1	110	6	159	9	2	22	155	58	2	213	333	38	19	68
Bacteria	Actinobacteria	Actinomycetia	Propionibacteriales	Nocardioidaceae	Nocardioides	Nocardioides caeni	32	66	1	65	116	113	13	58	17	78	11	1	97	113	216	45	74
Bacteria	Actinobacteria	Actinomycetia	Propionibacteriales	Nocardioidaceae	Nocardioides	Nocardioides cavernae	519	1261	2	568	574	1246	249	270	590	3155	546	568	2347	1170	828	1032	1718
Bacteria	Actinobacteria	Actinomycetia	Propionibacteriales	Nocardioidaceae	Nocardioides	Nocardioides currus	142	231	7	225	174	328	86	24	150	431	149	97	555	456	653	164	618
Bacteria	Actinobacteria	Actinomycetia	Propionibacteriales	Nocardioidaceae	Nocardioides	Nocardioides cynanchi	78	250	8	11	171	382	68	58	71	338	81	95	445	539	436	103	749
Bacteria	Actinobacteria	Actinomycetia	Propionibacteriales	Nocardioidaceae	Nocardioides	Nocardioides daedukensis	6	148	2	137	96	238	7	3	111	65	16	129	229	287	212	42	233
Bacteria	Actinobacteria	Actinomycetia	Propionibacteriales	Nocardioidaceae	Nocardioides	Nocardioides daejeonensis	20	104	9	103	41	74	40	12	124	224	35	132	265	168	216	38	116
Bacteria	Actinobacteria	Actinomycetia	Propionibacteriales	Nocardioidaceae	Nocardioides	Nocardioides daphniae	25	176	4	76	41	111	19	37	48	221	82	176	361	322	278	55	255
Bacteria	Actinobacteria	Actinomycetia	Propionibacteriales	Nocardioidaceae	Nocardioides	Nocardioides deserti	55	121	2	119	43	98	3	40	38	159	46	30	226	211	197	65	51
Bacteria	Actinobacteria	Actinomycetia	Propionibacteriales	Nocardioidaceae	Nocardioides	Nocardioides dokdonensis	34	66	9	57	51	152	12	12	118	250	22	280	298	321	424	96	480
Bacteria	Actinobacteria	Actinomycetia	Propionibacteriales	Nocardioidaceae	Nocardioides	Nocardioides dongxiaopingii	12	14	0	1	23	12	0	0	19	38	7	0	19	25	21	1	3
Bacteria	Actinobacteria	Actinomycetia	Propionibacteriales	Nocardioidaceae	Nocardioides	Nocardioides eburneiflavus	34	184	9	309	176	331	44	79	161	450	50	346	473	622	560	102	256
Bacteria	Actinobacteria	Actinomycetia	Propionibacteriales	Nocardioidaceae	Nocardioides	Nocardioides euryhalodurans	191	519	25	579	940	502	143	134	208	771	145	359	836	1924	1263	237	787
Bacteria	Actinobacteria	Actinomycetia	Propionibacteriales	Nocardioidaceae	Nocardioides	Nocardioides exalbidus	61	150	2	91	98	193	24	2	81	273	88	1	337	407	157	39	117
Bacteria	Actinobacteria	Actinomycetia	Propionibacteriales	Nocardioidaceae	Nocardioides	Nocardioides ferulae	49	106	10	3	157	166	52	44	24	434	100	170	478	229	281	77	493
Bacteria	Actinobacteria	Actinomycetia	Propionibacteriales	Nocardioidaceae	Nocardioides	Nocardioides flavus Wang et al. 2016	30	180	15	90	105	356	31	66	198	242	69	182	306	230	178	124	416
Bacteria	Actinobacteria	Actinomycetia	Propionibacteriales	Nocardioidaceae	Nocardioides	Nocardioides ganghwensis	39	118	1	192	60	154	67	32	84	562	42	176	215	212	256	102	381
Bacteria	Actinobacteria	Actinomycetia	Propionibacteriales	Nocardioidaceae	Nocardioides	Nocardioides gansuensis	82	220	6	69	183	275	30	49	82	359	157	91	575	569	612	146	469
Bacteria	Actinobacteria	Actinomycetia	Propionibacteriales	Nocardioidaceae	Nocardioides	Nocardioides gilvus	7	90	1	86	62	226	14	48	2	156	9	0	255	92	187	64	125
Bacteria	Actinobacteria	Actinomycetia	Propionibacteriales	Nocardioidaceae	Nocardioides	Nocardioides ginsengisegetis	8	67	0	59	120	124	13	11	42	120	59	36	134	103	170	31	5
Bacteria	Actinobacteria	Actinomycetia	Propionibacteriales	Nocardioidaceae	Nocardioides	Nocardioides glacieisoli	135	301	10	190	99	541	75	103	249	394	197	178	547	486	608	158	610
Bacteria	Actinobacteria	Actinomycetia	Propionibacteriales	Nocardioidaceae	Nocardioides	Nocardioides guangzhouensis	128	517	12	272	289	280	78	156	214	878	153	202	1340	1092	856	190	907
Bacteria	Actinobacteria	Actinomycetia	Propionibacteriales	Nocardioidaceae	Nocardioides	Nocardioides halotolerans	138	428	10	316	303	415	105	117	177	791	302	195	977	407	427	201	625
Bacteria	Actinobacteria	Actinomycetia	Propionibacteriales	Nocardioidaceae	Nocardioides	Nocardioides houyundeii	14	133	0	105	56	202	22	21	59	137	33	0	95	32	298	47	83
Bacteria	Actinobacteria	Actinomycetia	Propionibacteriales	Nocardioidaceae	Nocardioides	Nocardioides humi	50	78	2	3	152	92	9	12	1	123	68	1	260	546	226	47	153
Bacteria	Actinobacteria	Actinomycetia	Propionibacteriales	Nocardioidaceae	Nocardioides	Nocardioides hwasunensis	33	160	9	77	173	423	28	48	33	319	82	47	337	766	162	95	185
Bacteria	Actinobacteria	Actinomycetia	Propionibacteriales	Nocardioidaceae	Nocardioides	Nocardioides immobilis	117	200	10	107	150	721	62	79	108	273	91	242	1225	1882	368	122	314
Bacteria	Actinobacteria	Actinomycetia	Propionibacteriales	Nocardioidaceae	Nocardioides	Nocardioides insulae	51	126	1	151	41	113	8	53	23	217	22	85	243	264	128	26	336
Bacteria	Actinobacteria	Actinomycetia	Propionibacteriales	Nocardioidaceae	Nocardioides	Nocardioides iriomotensis	94	311	8	207	112	311	41	35	79	592	125	237	707	544	430	233	694
Bacteria	Actinobacteria	Actinomycetia	Propionibacteriales	Nocardioidaceae	Nocardioides	Nocardioides islandensis	50	634	7	664	243	533	215	135	342	1097	141	383	1343	1591	790	320	950
Bacteria	Actinobacteria	Actinomycetia	Propionibacteriales	Nocardioidaceae	Nocardioides	Nocardioides jejuensis	23	58	2	83	35	73	17	1	10	84	1	3	161	323	14	16	139
Bacteria	Actinobacteria	Actinomycetia	Propionibacteriales	Nocardioidaceae	Nocardioides	Nocardioides jensenii	27	118	2	129	117	203	22	0	85	32	81	139	340	222	290	45	82
Bacteria	Actinobacteria	Actinomycetia	Propionibacteriales	Nocardioidaceae	Nocardioides	Nocardioides kongjuensis	41	33	0	66	57	47	11	16	49	128	17	14	205	207	104	50	115
Bacteria	Actinobacteria	Actinomycetia	Propionibacteriales	Nocardioidaceae	Nocardioides	Nocardioides kribbensis	0	29	1	3	60	35	15	24	0	70	0	0	63	124	27	7	13
Bacteria	Actinobacteria	Actinomycetia	Propionibacteriales	Nocardioidaceae	Nocardioides	Nocardioides lianchengensis	99	475	2	181	231	446	42	55	89	664	1073	94	835	653	520	208	462
Bacteria	Actinobacteria	Actinomycetia	Propionibacteriales	Nocardioidaceae	Nocardioides	Nocardioides litoris	162	312	5	225	51	447	61	133	215	411	145	93	567	810	690	236	636
Bacteria	Actinobacteria	Actinomycetia	Propionibacteriales	Nocardioidaceae	Nocardioides	Nocardioides luteus	65	122	3	188	58	83	29	30	49	154	52	38	160	153	169	58	81
Bacteria	Actinobacteria	Actinomycetia	Propionibacteriales	Nocardioidaceae	Nocardioides	Nocardioides marinisabuli	24	62	10	130	68	354	51	39	75	147	124	41	549	595	274	73	327
Bacteria	Actinobacteria	Actinomycetia	Propionibacteriales	Nocardioidaceae	Nocardioides	Nocardioides marinus	3	272	9	91	94	336	60	56	55	301	155	45	568	349	288	94	108
Bacteria	Actinobacteria	Actinomycetia	Propionibacteriales	Nocardioidaceae	Nocardioides	Nocardioides massiliensis	26	71	5	38	39	100	35	11	98	134	95	81	384	831	237	101	339
Bacteria	Actinobacteria	Actinomycetia	Propionibacteriales	Nocardioidaceae	Nocardioides	Nocardioides mesophilus	159	221	16	164	189	231	109	155	79	352	80	122	645	601	362	219	914
Bacteria	Actinobacteria	Actinomycetia	Propionibacteriales	Nocardioidaceae	Nocardioides	Nocardioides oleivorans	35	158	3	237	146	294	32	59	165	234	126	4	501	770	264	80	322
Bacteria	Actinobacteria	Actinomycetia	Propionibacteriales	Nocardioidaceae	Nocardioides	Nocardioides panaciterrulae	17	247	8	104	178	267	71	42	109	220	118	121	381	457	377	127	246
Bacteria	Actinobacteria	Actinomycetia	Propionibacteriales	Nocardioidaceae	Nocardioides	Nocardioides panzhihuensis	32	51	1	82	108	141	28	22	34	52	1	5	42	213	105	18	117
Bacteria	Actinobacteria	Actinomycetia	Propionibacteriales	Nocardioidaceae	Nocardioides	Nocardioides pelophilus	41	166	3	39	39	190	48	15	24	239	35	90	317	186	298	57	125
Bacteria	Actinobacteria	Actinomycetia	Propionibacteriales	Nocardioidaceae	Nocardioides	Nocardioides perillae	40	236	8	13	183	463	39	91	71	275	36	129	466	519	239	109	327
Bacteria	Actinobacteria	Actinomycetia	Propionibacteriales	Nocardioidaceae	Nocardioides	Nocardioides phosphati	9	32	4	45	41	38	13	0	35	81	26	109	96	124	110	14	135
Bacteria	Actinobacteria	Actinomycetia	Propionibacteriales	Nocardioidaceae	Nocardioides	Nocardioides plantarum	105	292	5	94	143	226	49	55	109	389	82	121	461	1301	463	148	323
Bacteria	Actinobacteria	Actinomycetia	Propionibacteriales	Nocardioidaceae	Nocardioides	Nocardioides psychrotolerans	112	209	13	32	190	141	31	76	51	236	135	140	470	750	703	45	481
Bacteria	Actinobacteria	Actinomycetia	Propionibacteriales	Nocardioidaceae	Nocardioides	Nocardioides rubriscoriae	117	377	13	83	176	443	131	49	72	432	142	105	577	1650	419	117	1216
Bacteria	Actinobacteria	Actinomycetia	Propionibacteriales	Nocardioidaceae	Nocardioides	Nocardioides salarius	32	144	7	51	93	67	13	13	5	106	72	22	172	185	111	53	211
Bacteria	Actinobacteria	Actinomycetia	Propionibacteriales	Nocardioidaceae	Nocardioides	Nocardioides sambongensis	29	137	3	81	61	106	34	49	158	326	128	116	453	561	119	128	291
Bacteria	Actinobacteria	Actinomycetia	Propionibacteriales	Nocardioidaceae	Nocardioides	Nocardioides sediminis	35	242	7	251	155	277	23	34	87	416	70	191	489	388	321	117	421
Bacteria	Actinobacteria	Actinomycetia	Propionibacteriales	Nocardioidaceae	Nocardioides	Nocardioides seonyuensis	74	208	5	121	119	233	40	51	37	252	70	152	509	276	216	107	257
Bacteria	Actinobacteria	Actinomycetia	Propionibacteriales	Nocardioidaceae	Nocardioides	Nocardioides silvaticus	11	91	5	110	149	136	16	23	11	140	52	125	201	299	158	93	194
Bacteria	Actinobacteria	Actinomycetia	Propionibacteriales	Nocardioidaceae	Nocardioides	Nocardioides soli	33	257	7	443	167	209	38	84	79	403	184	93	400	569	135	103	339
Bacteria	Actinobacteria	Actinomycetia	Propionibacteriales	Nocardioidaceae	Nocardioides	Nocardioides solisilvae	130	142	1	103	110	1007	71	0	17	250	37	28	321	301	261	57	123
Bacteria	Actinobacteria	Actinomycetia	Propionibacteriales	Nocardioidaceae	Nocardioides	Nocardioides sp. 1598	1	33	0	40	42	260	8	14	18	88	29	11	46	229	71	44	14
Bacteria	Actinobacteria	Actinomycetia	Propionibacteriales	Nocardioidaceae	Nocardioides	Nocardioides sp. 1609	125	139	0	145	41	101	48	102	104	197	91	73	315	583	259	70	70
Bacteria	Actinobacteria	Actinomycetia	Propionibacteriales	Nocardioidaceae	Nocardioides	Nocardioides sp. 406	0	5	0	4	0	16	7	0	0	15	0	9	36	39	36	10	19
Bacteria	Actinobacteria	Actinomycetia	Propionibacteriales	Nocardioidaceae	Nocardioides	Nocardioides sp. 503	19	92	3	85	102	99	36	57	52	201	94	49	337	433	118	56	159
Bacteria	Actinobacteria	Actinomycetia	Propionibacteriales	Nocardioidaceae	Nocardioides	Nocardioides sp. 603	13	27	1	25	0	10	15	21	0	48	16	0	64	113	23	19	10
Bacteria	Actinobacteria	Actinomycetia	Propionibacteriales	Nocardioidaceae	Nocardioides	Nocardioides sp. 616	40	68	1	42	113	81	0	19	0	56	14	1	140	117	100	31	110
Bacteria	Actinobacteria	Actinomycetia	Propionibacteriales	Nocardioidaceae	Nocardioides	Nocardioides sp. AX2bis	676	1043	74	800	2350	1861	215	59	562	822	236	219	4247	5571	3180	212	1539
Bacteria	Actinobacteria	Actinomycetia	Propionibacteriales	Nocardioidaceae	Nocardioides	Nocardioides sp. BGMRC 2183	95	124	5	67	46	62	47	76	47	189	60	145	303	231	94	82	63
Bacteria	Actinobacteria	Actinomycetia	Propionibacteriales	Nocardioidaceae	Nocardioides	Nocardioides sp. BN130099	97	399	5	566	112	170	83	84	192	331	134	189	438	253	453	347	400
Bacteria	Actinobacteria	Actinomycetia	Propionibacteriales	Nocardioidaceae	Nocardioides	Nocardioides sp. BN140041	73	106	47	171	143	226	116	225	148	247	28	106	350	505	312	59	270
Bacteria	Actinobacteria	Actinomycetia	Propionibacteriales	Nocardioidaceae	Nocardioides	Nocardioides sp. CBS4Y-1	60	103	5	79	122	67	24	26	33	199	75	35	269	310	215	43	261
Bacteria	Actinobacteria	Actinomycetia	Propionibacteriales	Nocardioidaceae	Nocardioides	Nocardioides sp. CF167	42	54	3	22	38	52	24	4	1	129	36	12	214	147	156	26	242
Bacteria	Actinobacteria	Actinomycetia	Propionibacteriales	Nocardioidaceae	Nocardioides	Nocardioides sp. CF204	3	35	1	2	39	179	23	14	28	65	60	146	114	174	107	30	53
Bacteria	Actinobacteria	Actinomycetia	Propionibacteriales	Nocardioidaceae	Nocardioides	Nocardioides sp. CF479	42	355	5	331	128	987	108	56	175	466	138	288	572	616	393	213	367
Bacteria	Actinobacteria	Actinomycetia	Propionibacteriales	Nocardioidaceae	Nocardioides	Nocardioides sp. CF8	32	148	13	35	164	162	37	12	65	58	27	88	288	433	140	59	567
Bacteria	Actinobacteria	Actinomycetia	Propionibacteriales	Nocardioidaceae	Nocardioides	Nocardioides sp. CGMCC 1.13656	1	10	0	1	4	21	10	66	5	28	0	26	126	211	16	4	0
Bacteria	Actinobacteria	Actinomycetia	Propionibacteriales	Nocardioidaceae	Nocardioides	Nocardioides sp. DJM-14	62	87	14	73	176	301	16	40	38	169	66	106	372	179	183	21	511
Bacteria	Actinobacteria	Actinomycetia	Propionibacteriales	Nocardioidaceae	Nocardioides	Nocardioides sp. dk3136	0	0	0	0	0	0	1	0	0	0	0	0	0	14	0	1	0
Bacteria	Actinobacteria	Actinomycetia	Propionibacteriales	Nocardioidaceae	Nocardioides	Nocardioides sp. dk4132	0	0	0	0	0	0	0	3	0	0	0	34	35	203	22	2	0
Bacteria	Actinobacteria	Actinomycetia	Propionibacteriales	Nocardioidaceae	Nocardioides	Nocardioides sp. dk884	0	35	0	35	0	17	0	22	0	31	0	0	6	0	30	15	95
Bacteria	Actinobacteria	Actinomycetia	Propionibacteriales	Nocardioidaceae	Nocardioides	Nocardioides sp. G10	116	326	6	247	250	370	56	43	82	366	227	118	480	646	648	166	353
Bacteria	Actinobacteria	Actinomycetia	Propionibacteriales	Nocardioidaceae	Nocardioides	Nocardioides sp. GY 10113	23	185	9	68	68	310	61	33	3	196	90	116	309	441	216	97	150
Bacteria	Actinobacteria	Actinomycetia	Propionibacteriales	Nocardioidaceae	Nocardioides	Nocardioides sp. GY 10127	53	117	2	208	176	293	29	39	49	197	209	102	308	314	170	97	313
Bacteria	Actinobacteria	Actinomycetia	Propionibacteriales	Nocardioidaceae	Nocardioides	Nocardioides sp. HDW12A	60	109	4	61	148	945	31	40	53	238	67	76	375	493	206	67	175
Bacteria	Actinobacteria	Actinomycetia	Propionibacteriales	Nocardioidaceae	Nocardioides	Nocardioides sp. HDW12B	176	381	27	318	301	327	165	142	335	1033	200	1394	1123	1145	973	347	7602
Bacteria	Actinobacteria	Actinomycetia	Propionibacteriales	Nocardioidaceae	Nocardioides	Nocardioides sp. HLT2-9	109	404	6	257	548	269	105	85	101	522	142	18	523	1032	1805	198	181
Bacteria	Actinobacteria	Actinomycetia	Propionibacteriales	Nocardioidaceae	Nocardioides	Nocardioides sp. IC4_145	38	170	1	69	122	66	20	47	4	140	97	22	137	151	178	66	264
Bacteria	Actinobacteria	Actinomycetia	Propionibacteriales	Nocardioidaceae	Nocardioides	Nocardioides sp. Iso805N	80	147	2	155	142	444	33	30	79	202	51	152	372	640	122	70	166
Bacteria	Actinobacteria	Actinomycetia	Propionibacteriales	Nocardioidaceae	Nocardioides	Nocardioides sp. J54	0	15	0	13	18	22	2	26	0	47	1	1	49	98	82	21	3
Bacteria	Actinobacteria	Actinomycetia	Propionibacteriales	Nocardioidaceae	Nocardioides	Nocardioides sp. J9	24	21	0	0	1	24	1	17	17	28	11	40	43	26	4	3	33
Bacteria	Actinobacteria	Actinomycetia	Propionibacteriales	Nocardioidaceae	Nocardioides	Nocardioides sp. JQ2195	74	79	4	43	2	156	15	1	65	257	49	3	158	287	185	21	355
Bacteria	Actinobacteria	Actinomycetia	Propionibacteriales	Nocardioidaceae	Nocardioides	Nocardioides sp. K1W22B-1	58	38	1	15	176	121	2	14	68	169	57	105	259	147	114	62	134
Bacteria	Actinobacteria	Actinomycetia	Propionibacteriales	Nocardioidaceae	Nocardioides	Nocardioides sp. KC13	30	16	4	8	0	18	1	0	3	8	18	34	40	65	77	9	2
Bacteria	Actinobacteria	Actinomycetia	Propionibacteriales	Nocardioidaceae	Nocardioides	Nocardioides sp. KIGAM211	76	187	7	86	122	346	34	32	33	354	136	7	703	452	263	108	139
Bacteria	Actinobacteria	Actinomycetia	Propionibacteriales	Nocardioidaceae	Nocardioides	Nocardioides sp. Leaf285	14	23	0	1	0	18	6	0	8	54	10	21	19	29	135	27	6
Bacteria	Actinobacteria	Actinomycetia	Propionibacteriales	Nocardioidaceae	Nocardioides	Nocardioides sp. Leaf307	1	0	0	0	0	53	0	0	24	21	24	0	1	12	37	2	0
Bacteria	Actinobacteria	Actinomycetia	Propionibacteriales	Nocardioidaceae	Nocardioides	Nocardioides sp. LS1	47	28	0	47	39	73	2	1	29	180	27	37	167	206	124	32	82
Bacteria	Actinobacteria	Actinomycetia	Propionibacteriales	Nocardioidaceae	Nocardioides	Nocardioides sp. MAH-18	0	22	0	34	0	0	0	20	0	28	0	0	5	33	0	4	33
Bacteria	Actinobacteria	Actinomycetia	Propionibacteriales	Nocardioidaceae	Nocardioides	Nocardioides sp. MC1495	0	2	1	0	46	285	15	6	1	14	0	1	125	267	30	29	1
Bacteria	Actinobacteria	Actinomycetia	Propionibacteriales	Nocardioidaceae	Nocardioides	Nocardioides sp. OAE507	66	268	8	80	28	129	29	44	76	269	85	87	495	129	306	121	194
Bacteria	Actinobacteria	Actinomycetia	Propionibacteriales	Nocardioidaceae	Nocardioides	Nocardioides sp. OAE577	0	32	0	76	4	46	6	0	40	96	14	32	20	67	142	23	124
Bacteria	Actinobacteria	Actinomycetia	Propionibacteriales	Nocardioidaceae	Nocardioides	Nocardioides sp. PD653	0	8	0	0	0	5	3	0	0	0	0	0	30	0	0	15	65
Bacteria	Actinobacteria	Actinomycetia	Propionibacteriales	Nocardioidaceae	Nocardioides	Nocardioides sp. Root122	88	350	5	139	79	281	86	116	145	862	195	167	533	733	265	248	525
Bacteria	Actinobacteria	Actinomycetia	Propionibacteriales	Nocardioidaceae	Nocardioides	Nocardioides sp. Root140	1	42	1	27	68	102	8	3	21	62	0	33	113	191	17	30	115
Bacteria	Actinobacteria	Actinomycetia	Propionibacteriales	Nocardioidaceae	Nocardioides	Nocardioides sp. Root151	36	66	0	13	24	0	8	0	3	26	0	13	7	32	1	23	43
Bacteria	Actinobacteria	Actinomycetia	Propionibacteriales	Nocardioidaceae	Nocardioides	Nocardioides sp. Root190	4	83	2	58	22	33	77	14	1	109	30	106	134	186	170	70	118
Bacteria	Actinobacteria	Actinomycetia	Propionibacteriales	Nocardioidaceae	Nocardioides	Nocardioides sp. S-1144	18	0	0	62	27	31	8	0	57	4	24	0	39	96	2	20	78
Bacteria	Actinobacteria	Actinomycetia	Propionibacteriales	Nocardioidaceae	Nocardioides	Nocardioides sp. S-531	23	18	2	2	64	16	0	21	0	21	33	33	77	44	2	10	22
Bacteria	Actinobacteria	Actinomycetia	Propionibacteriales	Nocardioidaceae	Nocardioides	Nocardioides sp. S-713	0	27	1	27	1	31	10	0	8	50	56	0	51	1	32	17	0
Bacteria	Actinobacteria	Actinomycetia	Propionibacteriales	Nocardioidaceae	Nocardioides	Nocardioides sp. SAI-095	1	41	0	1	8	23	2	13	1	45	9	46	63	83	84	2	60
Bacteria	Actinobacteria	Actinomycetia	Propionibacteriales	Nocardioidaceae	Nocardioides	Nocardioides sp. SLBN-16	14	38	1	30	33	72	15	61	21	72	1	35	63	64	68	25	35
Bacteria	Actinobacteria	Actinomycetia	Propionibacteriales	Nocardioidaceae	Nocardioides	Nocardioides sp. SLBN-172	32	39	2	0	35	39	4	9	0	88	17	0	41	119	36	26	57
Bacteria	Actinobacteria	Actinomycetia	Propionibacteriales	Nocardioidaceae	Nocardioides	Nocardioides sp. SLBN-35	53	126	2	112	56	306	37	35	88	169	62	359	166	245	120	79	173
Bacteria	Actinobacteria	Actinomycetia	Propionibacteriales	Nocardioidaceae	Nocardioides	Nocardioides sp. Soil774	32	219	7	108	29	211	54	46	92	367	46	134	318	367	299	124	406
Bacteria	Actinobacteria	Actinomycetia	Propionibacteriales	Nocardioidaceae	Nocardioides	Nocardioides sp. Soil777	19	92	4	86	93	155	26	3	256	262	46	30	308	95	229	91	172
Bacteria	Actinobacteria	Actinomycetia	Propionibacteriales	Nocardioidaceae	Nocardioides	Nocardioides sp. Soil796	14	0	0	0	0	62	0	0	16	27	0	0	23	81	0	9	89
Bacteria	Actinobacteria	Actinomycetia	Propionibacteriales	Nocardioidaceae	Nocardioides	Nocardioides sp. Soil797	88	96	2	137	8	155	4	7	1	119	52	58	175	549	40	39	110
Bacteria	Actinobacteria	Actinomycetia	Propionibacteriales	Nocardioidaceae	Nocardioides	Nocardioides sp. Soil805	114	198	4	109	105	120	56	34	63	177	44	44	367	297	285	45	88
Bacteria	Actinobacteria	Actinomycetia	Propionibacteriales	Nocardioidaceae	Nocardioides	Nocardioides sp. URHA0020	38	275	5	251	29	467	29	146	41	340	131	389	464	413	249	99	321
Bacteria	Actinobacteria	Actinomycetia	Propionibacteriales	Nocardioidaceae	Nocardioides	Nocardioides sp. URHA0032	64	215	1	207	159	123	59	109	207	555	141	79	449	268	465	152	351
Bacteria	Actinobacteria	Actinomycetia	Propionibacteriales	Nocardioidaceae	Nocardioides	Nocardioides sp. WS12	20	85	1	26	76	98	24	5	39	123	11	127	176	143	285	61	12
Bacteria	Actinobacteria	Actinomycetia	Propionibacteriales	Nocardioidaceae	Nocardioides	Nocardioides sp. Y192	5	49	1	0	11	54	11	11	0	14	0	0	42	186	27	17	0
Bacteria	Actinobacteria	Actinomycetia	Propionibacteriales	Nocardioidaceae	Nocardioides	Nocardioides sp. Y6	60	742	1	288	283	181	74	191	160	606	250	314	1118	500	475	193	630
Bacteria	Actinobacteria	Actinomycetia	Propionibacteriales	Nocardioidaceae	Nocardioides	Nocardioides sp. YIM 123512	109	341	2	158	163	338	67	68	41	422	115	149	382	444	148	60	412
Bacteria	Actinobacteria	Actinomycetia	Propionibacteriales	Nocardioidaceae	Nocardioides	Nocardioides sp. YR527	14	46	2	86	16	92	1	10	9	94	47	14	118	150	104	38	93
Bacteria	Actinobacteria	Actinomycetia	Propionibacteriales	Nocardioidaceae	Nocardioides	Nocardioides sp. zg-1228	40	276	5	55	112	233	72	100	68	323	74	64	448	433	173	82	306
Bacteria	Actinobacteria	Actinomycetia	Propionibacteriales	Nocardioidaceae	Nocardioides	Nocardioides sp. zg-1230	161	450	7	193	169	338	89	96	429	855	227	289	817	522	207	309	666
Bacteria	Actinobacteria	Actinomycetia	Propionibacteriales	Nocardioidaceae	Nocardioides	Nocardioides sp. zg-1308	81	252	5	113	200	251	84	61	18	589	102	51	405	376	314	217	376
Bacteria	Actinobacteria	Actinomycetia	Propionibacteriales	Nocardioidaceae	Nocardioides	Nocardioides sp. zg-578	41	22	1	1	17	55	5	0	0	29	0	0	81	77	39	4	1
Bacteria	Actinobacteria	Actinomycetia	Propionibacteriales	Nocardioidaceae	Nocardioides	Nocardioides sp. zg-DK7169	23	69	12	78	16	113	13	1	65	103	55	30	193	58	33	48	162
Bacteria	Actinobacteria	Actinomycetia	Propionibacteriales	Nocardioidaceae	Nocardioides	Nocardioides sp. ZJ1307	0	2	0	0	21	8	0	0	0	0	4	0	0	0	0	3	8
Bacteria	Actinobacteria	Actinomycetia	Propionibacteriales	Nocardioidaceae	Nocardioides	Nocardioides sp. ZJ1313	0	3	0	0	0	28	0	3	0	12	20	0	35	94	15	21	1
Bacteria	Actinobacteria	Actinomycetia	Propionibacteriales	Nocardioidaceae	Nocardioides	Nocardioides sp.	34	121	5	110	154	170	46	40	111	153	11	11	278	307	179	60	557
Bacteria	Actinobacteria	Actinomycetia	Propionibacteriales	Nocardioidaceae	Nocardioides	Nocardioides speluncae	163	168	13	119	309	287	54	34	124	445	38	176	431	766	401	146	175
Bacteria	Actinobacteria	Actinomycetia	Propionibacteriales	Nocardioidaceae	Nocardioides	Nocardioides stalactiti	11	76	5	47	84	72	22	21	37	57	77	2	233	320	124	53	75
Bacteria	Actinobacteria	Actinomycetia	Propionibacteriales	Nocardioidaceae	Nocardioides	Nocardioides szechwanensis	115	188	8	120	92	490	83	71	69	347	129	221	494	600	362	100	557
Bacteria	Actinobacteria	Actinomycetia	Propionibacteriales	Nocardioidaceae	Nocardioides	Nocardioides terrae	2	186	3	76	137	202	32	5	32	278	37	57	291	380	89	40	129
Bacteria	Actinobacteria	Actinomycetia	Propionibacteriales	Nocardioidaceae	Nocardioides	Nocardioides terrigena	2	109	6	220	47	142	32	46	34	214	115	76	185	176	29	122	175
Bacteria	Actinobacteria	Actinomycetia	Propionibacteriales	Nocardioidaceae	Nocardioides	Nocardioides thalensis	59	121	5	3	127	135	36	27	19	109	23	71	323	483	253	49	90
Bacteria	Actinobacteria	Actinomycetia	Propionibacteriales	Nocardioidaceae	Nocardioides	Nocardioides ungokensis	29	276	3	173	232	311	32	17	81	276	46	124	622	689	331	60	376
Bacteria	Actinobacteria	Actinomycetia	Propionibacteriales	Nocardioidaceae	Nocardioides	Nocardioides zeae	72	134	10	42	146	260	18	12	75	139	137	69	242	381	182	67	268
Bacteria	Actinobacteria	Actinomycetia	Propionibacteriales	Nocardioidaceae	Nocardioides	uncultured Nocardioides sp.	81	265	14	236	311	851	58	113	247	377	73	251	657	751	425	182	554
Bacteria	Actinobacteria	Actinomycetia	Propionibacteriales	Propionibacteriaceae	Cutibacterium	[Propionibacterium] humerusii	1805	3825	9	2714	994	3461	955	1227	1805	4248	1764	1887	6654	2685	2864	2459	3431
Bacteria	Actinobacteria	Actinomycetia	Propionibacteriales	Propionibacteriaceae	Cutibacterium	Cutibacterium acnes	231826	618526	1171	534254	196889	444369	159299	182230	295635	646420	279645	313560	975194	387212	550329	377119	534538
Bacteria	Actinobacteria	Actinomycetia	Propionibacteriales	Propionibacteriaceae	Cutibacterium	Cutibacterium avidum	1934	5631	17	3327	1482	3975	1793	1723	2313	10066	2319	2282	7764	2971	3639	6937	5361
Bacteria	Actinobacteria	Actinomycetia	Propionibacteriales	Propionibacteriaceae	Cutibacterium	Cutibacterium granulosum	15624	41968	107	30976	13507	33774	13708	12510	18758	60716	16148	22685	74039	24943	30602	44600	38572
Bacteria	Actinobacteria	Actinomycetia	Propionibacteriales	Propionibacteriaceae	Cutibacterium	Cutibacterium namnetense	1241	3818	5	2489	1302	2919	780	842	1634	4091	2427	1774	6462	2624	2921	1552	3032
Bacteria	Actinobacteria	Actinomycetia	Propionibacteriales	Propionibacteriaceae	Cutibacterium	Cutibacterium sp. WCA-380-WT-3A	985	2286	1	1536	759	1393	586	648	955	2053	739	1029	3707	1158	1455	1365	1932
Bacteria	Actinobacteria	Actinomycetia	Propionibacteriales	Propionibacteriaceae	Microlunatus	Microlunatus antarcticus	301	2952	0	974	676	922	311	493	555	2446	552	701	5547	946	1325	606	1203
Bacteria	Actinobacteria	Actinomycetia	Propionibacteriales	Propionibacteriaceae	Microlunatus	Microlunatus endophyticus	102	241	2	172	162	296	42	62	74	427	59	98	707	780	124	89	199
Bacteria	Actinobacteria	Actinomycetia	Propionibacteriales	Propionibacteriaceae	Microlunatus	Microlunatus flavus	429	1970	4	597	341	668	185	321	417	2059	526	539	3560	805	763	507	946
Bacteria	Actinobacteria	Actinomycetia	Propionibacteriales	Propionibacteriaceae	Microlunatus	Microlunatus parietis	177	714	6	245	146	571	120	82	106	936	113	336	1165	780	446	210	575
Bacteria	Actinobacteria	Actinomycetia	Propionibacteriales	Propionibacteriaceae	Microlunatus	Microlunatus phosphovorus	788	1984	3	1569	447	1392	332	542	711	3851	1556	715	3985	3899	1388	1057	1998
Bacteria	Actinobacteria	Actinomycetia	Propionibacteriales	Propionibacteriaceae	Microlunatus	Microlunatus sagamiharensis	481	1844	3	901	321	691	208	270	435	1685	664	452	3690	569	636	627	958
Bacteria	Actinobacteria	Actinomycetia	Propionibacteriales	Propionibacteriaceae	Microlunatus	Microlunatus soli	103	177	2	108	139	250	74	27	156	435	116	40	755	542	366	156	287
Bacteria	Actinobacteria	Actinomycetia	Propionibacteriales	Propionibacteriaceae	Microlunatus	Microlunatus sp. Gsoil 973	85	212	5	87	159	837	33	28	66	399	85	47	1538	2700	218	115	261
Bacteria	Actinobacteria	Actinomycetia	Propionibacteriales	Propionibacteriaceae	Microlunatus	Microlunatus sp. KUDC0627	101	273	5	168	112	390	28	53	80	411	97	370	1230	2743	313	100	261
Bacteria	Actinobacteria	Actinomycetia	Propionibacteriales	Propionibacteriaceae	Microlunatus	Microlunatus speluncae	115	425	5	343	189	326	79	138	205	779	141	187	917	822	411	153	616
Bacteria	Actinobacteria	Actinomycetia	Propionibacteriales	Propionibacteriaceae	Microlunatus	Microlunatus terrae	50	178	4	12	71	431	52	66	111	545	33	141	571	869	160	149	267
Bacteria	Actinobacteria	Actinomycetia	Propionibacteriales	Propionibacteriaceae	Propionibacterium	Propionibacterium acidifaciens	15	348	3	175	48	66	58	37	112	211	78	216	330	173	211	137	204
Bacteria	Actinobacteria	Actinomycetia	Propionibacteriales	Propionibacteriaceae	Propionibacterium	Propionibacterium australiense	90	291	1	246	53	145	52	54	112	303	122	287	333	540	139	152	200
Bacteria	Actinobacteria	Actinomycetia	Propionibacteriales	Propionibacteriaceae	Propionibacterium	Propionibacterium cyclohexanicum	57	136	1	116	33	43	13	49	8	156	45	51	197	154	104	30	46
Bacteria	Actinobacteria	Actinomycetia	Propionibacteriales	Propionibacteriaceae	Propionibacterium	Propionibacterium freudenreichii	587	1696	6	1073	671	1453	436	517	801	1992	558	880	2631	1187	1127	820	951
Bacteria	Actinobacteria	Actinomycetia	Propionibacteriales	Propionibacteriaceae	Propionibacterium	Propionibacterium sp. 409-HC1	2034	4802	2	3574	1897	3474	1257	1368	2131	4942	1731	2627	7632	3376	3950	3228	3461
Bacteria	Actinobacteria	Actinomycetia	Propionibacteriales	Propionibacteriaceae	Propionibacterium	Propionibacterium sp. 434-HC2	1303	4163	8	3676	1382	3221	940	1103	2322	5052	1912	2604	6236	2465	3065	2206	3281
Bacteria	Actinobacteria	Actinomycetia	Propionibacteriales	Propionibacteriaceae	Propionibacterium	Propionibacterium sp. 4572_24	227	732	2	656	38	484	147	190	249	861	249	187	1044	444	644	333	537
Bacteria	Actinobacteria	Actinomycetia	Propionibacteriales	Propionibacteriaceae	Propionibacterium	Propionibacterium sp. 5_U_42AFAA	674	1692	2	1460	468	1181	414	482	824	1798	843	830	2392	1037	1541	1173	1657
Bacteria	Actinobacteria	Actinomycetia	Propionibacteriales	Propionibacteriaceae	Propionibacterium	Propionibacterium sp. CC003-HC2	294	920	1	942	312	633	339	295	514	1009	444	406	1476	478	1118	633	878
Bacteria	Actinobacteria	Actinomycetia	Propionibacteriales	Propionibacteriaceae	Propionibacterium	Propionibacterium sp. CG1_02_60_36	76	316	0	260	106	55	121	114	159	416	167	68	651	173	346	207	377
Bacteria	Actinobacteria	Actinomycetia	Propionibacteriales	Propionibacteriaceae	Propionibacterium	Propionibacterium sp. DORA_15	350	823	4	614	184	623	216	217	304	946	279	274	1127	274	404	379	587
Bacteria	Actinobacteria	Actinomycetia	Propionibacteriales	Propionibacteriaceae	Propionibacterium	Propionibacterium sp. HGH0353	165	833	4	599	201	579	299	269	502	1122	468	498	1386	522	796	604	881
Bacteria	Actinobacteria	Actinomycetia	Propionibacteriales	Propionibacteriaceae	Propionibacterium	Propionibacterium sp. HMSC062D02	4	7	0	7	2	8	2	2	9	2	2	23	18	2	7	6	14
Bacteria	Actinobacteria	Actinomycetia	Propionibacteriales	Propionibacteriaceae	Propionibacterium	Propionibacterium sp. HMSC062D05	15	18	0	26	1	7	2	2	2	41	12	2	23	16	4	18	4
Bacteria	Actinobacteria	Actinomycetia	Propionibacteriales	Propionibacteriaceae	Propionibacterium	Propionibacterium sp. HMSC065F07	49	93	0	63	9	153	63	14	45	73	39	2	186	31	22	157	185
Bacteria	Actinobacteria	Actinomycetia	Propionibacteriales	Propionibacteriaceae	Propionibacterium	Propionibacterium sp. HMSC067A01	11	18	0	32	5	20	7	18	12	34	10	17	53	26	10	30	20
Bacteria	Actinobacteria	Actinomycetia	Propionibacteriales	Propionibacteriaceae	Propionibacterium	Propionibacterium sp. HMSC067A02	36	68	3	117	37	64	33	60	78	150	13	80	95	48	77	77	98
Bacteria	Actinobacteria	Actinomycetia	Propionibacteriales	Propionibacteriaceae	Propionibacterium	Propionibacterium sp. HMSC068C01	35	36	0	42	7	61	11	10	3	65	21	2	48	44	64	35	69
Bacteria	Actinobacteria	Actinomycetia	Propionibacteriales	Propionibacteriaceae	Propionibacterium	Propionibacterium sp. HMSC069G10	5	14	0	13	11	26	4	11	1	8	2	38	33	11	10	12	18
Bacteria	Actinobacteria	Actinomycetia	Propionibacteriales	Propionibacteriaceae	Propionibacterium	Propionibacterium sp. HMSC075A12	0	2	0	0	0	1	1	1	1	2	6	0	3	1	2	2	0
Bacteria	Actinobacteria	Actinomycetia	Propionibacteriales	Propionibacteriaceae	Propionibacterium	Propionibacterium sp. HMSC078F01	51	78	0	42	53	48	14	52	32	100	67	38	199	163	79	64	292
Bacteria	Actinobacteria	Actinomycetia	Propionibacteriales	Propionibacteriaceae	Propionibacterium	Propionibacterium sp. HMSC078F10	4	13	0	3	1	3	1	1	5	4	1	24	5	2	3	4	7
Bacteria	Actinobacteria	Actinomycetia	Propionibacteriales	Propionibacteriaceae	Propionibacterium	Propionibacterium sp. JV5	6	189	2	122	25	62	62	9	118	252	63	186	456	96	95	142	271
Bacteria	Actinobacteria	Actinomycetia	Propionibacteriales	Propionibacteriaceae	Propionibacterium	Propionibacterium sp. KPL1838	0	4	0	0	0	1	1	0	0	6	0	0	16	0	27	16	0
Bacteria	Actinobacteria	Actinomycetia	Propionibacteriales	Propionibacteriaceae	Propionibacterium	Propionibacterium sp. KPL1844	3102	8493	16	5095	2799	6650	1859	2535	3667	11291	3519	3831	14506	4225	6191	6377	7419
Bacteria	Actinobacteria	Actinomycetia	Propionibacteriales	Propionibacteriaceae	Propionibacterium	Propionibacterium sp. KPL1849	351	1018	2	688	261	949	258	451	638	990	435	532	1875	826	810	468	1303
Bacteria	Actinobacteria	Actinomycetia	Propionibacteriales	Propionibacteriaceae	Propionibacterium	Propionibacterium sp. KPL1854	405	767	5	571	320	574	203	424	424	815	296	318	1389	421	765	547	748
Bacteria	Actinobacteria	Actinomycetia	Propionibacteriales	Propionibacteriaceae	Propionibacterium	Propionibacterium sp. KPL2000	34	6	0	14	0	29	1	0	0	50	4	18	17	0	0	20	0
Bacteria	Actinobacteria	Actinomycetia	Propionibacteriales	Propionibacteriaceae	Propionibacterium	Propionibacterium sp. KPL2003	161	405	0	145	158	320	94	75	153	423	133	166	558	123	284	230	330
Bacteria	Actinobacteria	Actinomycetia	Propionibacteriales	Propionibacteriaceae	Propionibacterium	Propionibacterium sp. KPL2008	78	284	1	191	4	246	53	98	80	280	59	137	400	164	138	133	96
Bacteria	Actinobacteria	Actinomycetia	Propionibacteriales	Propionibacteriaceae	Propionibacterium	Propionibacterium sp. KPL2009	149	633	1	276	85	227	158	165	183	518	351	335	1001	385	450	420	593
Bacteria	Actinobacteria	Actinomycetia	Propionibacteriales	Propionibacteriaceae	Propionibacterium	Propionibacterium sp. NM47_B9-13	40	93	0	18	0	53	18	65	5	33	10	20	84	0	25	15	75
Bacteria	Actinobacteria	Actinomycetia	Propionibacteriales	Propionibacteriaceae	Propionibacterium	Propionibacterium sp. oral taxon 192	164	239	0	115	88	389	15	68	83	253	38	16	352	104	262	105	167
Bacteria	Actinobacteria	Actinomycetia	Propionibacteriales	Propionibacteriaceae	Propionibacterium	Propionibacterium sp.	0	13	1	5	3	2	13	0	7	22	4	53	90	91	85	29	4
Bacteria	Actinobacteria	Actinomycetia	Propionibacteriales	Propionibacteriaceae	Tessaracoccus	Tessaracoccus antarcticus	81	147	6	33	17	82	16	34	39	64	28	286	199	398	215	46	268
Bacteria	Actinobacteria	Actinomycetia	Propionibacteriales	Propionibacteriaceae	Tessaracoccus	Tessaracoccus aquimaris	61	116	1	88	73	128	7	12	2	166	56	16	218	138	159	53	80
Bacteria	Actinobacteria	Actinomycetia	Propionibacteriales	Propionibacteriaceae	Tessaracoccus	Tessaracoccus bendigoensis	40	107	1	94	11	316	13	27	107	74	5	4	204	97	4	12	228
Bacteria	Actinobacteria	Actinomycetia	Propionibacteriales	Propionibacteriaceae	Tessaracoccus	Tessaracoccus defluvii	94	165	2	79	29	94	57	21	86	134	45	119	262	199	184	83	332
Bacteria	Actinobacteria	Actinomycetia	Propionibacteriales	Propionibacteriaceae	Tessaracoccus	Tessaracoccus flavescens	6	124	2	53	92	130	24	3	30	109	69	56	128	7	78	63	316
Bacteria	Actinobacteria	Actinomycetia	Propionibacteriales	Propionibacteriaceae	Tessaracoccus	Tessaracoccus flavus	5	91	1	71	79	338	37	11	3	139	64	83	372	737	102	53	203
Bacteria	Actinobacteria	Actinomycetia	Propionibacteriales	Propionibacteriaceae	Tessaracoccus	Tessaracoccus massiliensis	0	125	1	1	22	303	17	35	10	114	26	110	155	50	50	67	26
Bacteria	Actinobacteria	Actinomycetia	Propionibacteriales	Propionibacteriaceae	Tessaracoccus	Tessaracoccus oleiagri	27	221	2	21	4	222	41	52	26	143	34	130	362	218	106	84	94
Bacteria	Actinobacteria	Actinomycetia	Propionibacteriales	Propionibacteriaceae	Tessaracoccus	Tessaracoccus rhinocerotis	5	157	2	72	58	61	45	26	56	211	71	46	176	191	146	36	212
Bacteria	Actinobacteria	Actinomycetia	Propionibacteriales	Propionibacteriaceae	Tessaracoccus	Tessaracoccus sp. MC1627	12	39	0	12	27	18	1	10	0	20	34	36	65	24	45	9	0
Bacteria	Actinobacteria	Actinomycetia	Propionibacteriales	Propionibacteriaceae	Tessaracoccus	Tessaracoccus sp. MC1679	14	24	1	8	66	17	1	0	0	54	0	53	99	82	23	11	78
Bacteria	Actinobacteria	Actinomycetia	Propionibacteriales	Propionibacteriaceae	Tessaracoccus	Tessaracoccus sp. MC1756	0	1	0	11	34	14	10	11	0	1	0	29	15	18	22	8	1
Bacteria	Actinobacteria	Actinomycetia	Propionibacteriales	Propionibacteriaceae	Tessaracoccus	Tessaracoccus sp. MC1865	13	4	1	58	21	0	8	70	0	42	0	0	34	134	18	18	72
Bacteria	Actinobacteria	Actinomycetia	Propionibacteriales	Propionibacteriaceae	Tessaracoccus	Tessaracoccus sp. OH4464_COT-324	82	233	1	3	7	58	30	30	7	176	76	23	203	64	83	32	134
Bacteria	Actinobacteria	Actinomycetia	Propionibacteriales	Propionibacteriaceae	Tessaracoccus	Tessaracoccus sp. ZS01	20	3	0	2	61	39	4	16	72	46	14	0	58	34	60	57	75
Bacteria	Actinobacteria	Actinomycetia	Propionibacteriales	Propionibacteriaceae	Tessaracoccus	Tessaracoccus timonensis	508	3352	1	1102	762	1492	204	361	515	3753	854	535	4896	1367	979	616	810
Bacteria	Actinobacteria	Actinomycetia	Pseudonocardiales	Pseudonocardiaceae	Pseudonocardia	Pseudonocardia acaciae	128	392	30	141	424	380	106	119	144	465	109	135	1359	1370	1898	94	458
Bacteria	Actinobacteria	Actinomycetia	Pseudonocardiales	Pseudonocardiaceae	Pseudonocardia	Pseudonocardia alni	29	25	0	0	5	62	9	10	0	11	6	38	107	117	102	7	31
Bacteria	Actinobacteria	Actinomycetia	Pseudonocardiales	Pseudonocardiaceae	Pseudonocardia	Pseudonocardia ammonioxydans	436	1895	160	478	413	1245	643	570	245	1369	206	115	1765	1747	730	369	847
Bacteria	Actinobacteria	Actinomycetia	Pseudonocardiales	Pseudonocardiaceae	Pseudonocardia	Pseudonocardia antarctica	9	33	1	0	0	41	6	17	0	53	12	2	70	1	114	14	0
Bacteria	Actinobacteria	Actinomycetia	Pseudonocardiales	Pseudonocardiaceae	Pseudonocardia	Pseudonocardia asaccharolytica	305	415	38	227	534	448	125	119	170	993	89	164	1491	1118	1731	280	738
Bacteria	Actinobacteria	Actinomycetia	Pseudonocardiales	Pseudonocardiaceae	Pseudonocardia	Pseudonocardia autotrophica	179	277	20	265	402	431	77	142	105	949	209	239	980	1137	982	254	693
Bacteria	Actinobacteria	Actinomycetia	Pseudonocardiales	Pseudonocardiaceae	Pseudonocardia	Pseudonocardia bannensis	180	445	28	186	397	625	157	128	278	808	65	58	1866	1473	1883	153	389
Bacteria	Actinobacteria	Actinomycetia	Pseudonocardiales	Pseudonocardiaceae	Pseudonocardia	Pseudonocardia broussonetiae	232	967	30	157	248	939	245	75	217	1093	139	408	2476	1710	1983	241	1025
Bacteria	Actinobacteria	Actinomycetia	Pseudonocardiales	Pseudonocardiaceae	Pseudonocardia	Pseudonocardia cypriaca	93	467	14	96	253	272	109	68	201	1052	74	140	1025	998	807	193	395
Bacteria	Actinobacteria	Actinomycetia	Pseudonocardiales	Pseudonocardiaceae	Pseudonocardia	Pseudonocardia cytotoxica	34	211	8	78	156	281	47	81	48	308	104	91	450	932	282	109	374
Bacteria	Actinobacteria	Actinomycetia	Pseudonocardiales	Pseudonocardiaceae	Pseudonocardia	Pseudonocardia dioxanivorans	262	317	12	206	346	468	111	68	43	676	47	178	726	767	881	205	164
Bacteria	Actinobacteria	Actinomycetia	Pseudonocardiales	Pseudonocardiaceae	Pseudonocardia	Pseudonocardia endophytica	77	226	10	168	297	426	169	71	106	528	172	138	794	981	727	239	449
Bacteria	Actinobacteria	Actinomycetia	Pseudonocardiales	Pseudonocardiaceae	Pseudonocardia	Pseudonocardia eucalypti	228	409	23	308	355	399	60	41	232	617	102	83	1221	1791	1095	170	145
Bacteria	Actinobacteria	Actinomycetia	Pseudonocardiales	Pseudonocardiaceae	Pseudonocardia	Pseudonocardia hierapolitana	258	410	14	229	257	437	137	58	169	907	102	83	1048	836	1250	154	365
Bacteria	Actinobacteria	Actinomycetia	Pseudonocardiales	Pseudonocardiaceae	Pseudonocardia	Pseudonocardia hydrocarbonoxydans	406	405	26	398	529	762	161	40	100	566	152	225	1989	869	2004	204	519
Bacteria	Actinobacteria	Actinomycetia	Pseudonocardiales	Pseudonocardiaceae	Pseudonocardia	Pseudonocardia kunmingensis	195	288	20	283	283	385	142	95	61	772	42	63	867	762	1534	206	452
Bacteria	Actinobacteria	Actinomycetia	Pseudonocardiales	Pseudonocardiaceae	Pseudonocardia	Pseudonocardia oroxyli	142	253	19	113	266	376	52	83	102	433	67	121	756	744	386	147	303
Bacteria	Actinobacteria	Actinomycetia	Pseudonocardiales	Pseudonocardiaceae	Pseudonocardia	Pseudonocardia sediminis	369	312	12	187	166	364	42	43	167	574	98	65	727	606	712	165	357
Bacteria	Actinobacteria	Actinomycetia	Pseudonocardiales	Pseudonocardiaceae	Pseudonocardia	Pseudonocardia sp. 73-21	328	555	20	259	450	734	180	119	171	1305	174	103	1611	1722	2062	242	498
Bacteria	Actinobacteria	Actinomycetia	Pseudonocardiales	Pseudonocardiaceae	Pseudonocardia	Pseudonocardia sp. Ae331_Ps2	0	4	0	0	1	0	0	2	1	46	1	2	1	17	36	3	0
Bacteria	Actinobacteria	Actinomycetia	Pseudonocardiales	Pseudonocardiaceae	Pseudonocardia	Pseudonocardia sp. Ae356_Ps1	0	0	0	0	0	0	0	0	0	5	0	0	12	0	0	4	1
Bacteria	Actinobacteria	Actinomycetia	Pseudonocardiales	Pseudonocardiaceae	Pseudonocardia	Pseudonocardia sp. Ae406_Ps2	0	2	0	0	0	0	0	0	0	1	0	0	0	1	0	1	1
Bacteria	Actinobacteria	Actinomycetia	Pseudonocardiales	Pseudonocardiaceae	Pseudonocardia	Pseudonocardia sp. Ae505_Ps2	16	30	0	18	43	27	8	18	45	48	2	0	5	90	43	36	48
Bacteria	Actinobacteria	Actinomycetia	Pseudonocardiales	Pseudonocardiaceae	Pseudonocardia	Pseudonocardia sp. Ae707_Ps1	0	15	0	1	10	72	9	20	0	34	21	0	15	25	97	4	76
Bacteria	Actinobacteria	Actinomycetia	Pseudonocardiales	Pseudonocardiaceae	Pseudonocardia	Pseudonocardia sp. Ae717_Ps2	0	64	0	18	1	24	17	28	16	70	0	2	31	43	37	22	0
Bacteria	Actinobacteria	Actinomycetia	Pseudonocardiales	Pseudonocardiaceae	Pseudonocardia	Pseudonocardia sp. AL041005-10	30	89	10	15	18	151	20	15	57	148	14	5	164	68	47	53	62
Bacteria	Actinobacteria	Actinomycetia	Pseudonocardiales	Pseudonocardiaceae	Pseudonocardia	Pseudonocardia sp. C8	30	263	18	76	91	283	100	54	48	379	17	62	507	792	383	199	447
Bacteria	Actinobacteria	Actinomycetia	Pseudonocardiales	Pseudonocardiaceae	Pseudonocardia	Pseudonocardia sp. CAP47R	67	189	4	63	124	246	70	96	83	657	73	99	583	753	224	77	335
Bacteria	Actinobacteria	Actinomycetia	Pseudonocardiales	Pseudonocardiaceae	Pseudonocardia	Pseudonocardia sp. CGMCC 4.1532	328	926	26	485	557	833	117	125	240	613	187	145	2023	1331	2287	167	693
Bacteria	Actinobacteria	Actinomycetia	Pseudonocardiales	Pseudonocardiaceae	Pseudonocardia	Pseudonocardia sp. CNS-004	33	251	9	101	110	318	38	87	171	505	105	118	720	950	421	153	283
Bacteria	Actinobacteria	Actinomycetia	Pseudonocardiales	Pseudonocardiaceae	Pseudonocardia	Pseudonocardia sp. CNS-139	138	370	9	221	139	645	108	54	48	458	78	109	805	832	816	236	339
Bacteria	Actinobacteria	Actinomycetia	Pseudonocardiales	Pseudonocardiaceae	Pseudonocardia	Pseudonocardia sp. EC080619-01	0	2	0	0	0	0	0	0	0	11	1	1	12	0	0	7	0
Bacteria	Actinobacteria	Actinomycetia	Pseudonocardiales	Pseudonocardiaceae	Pseudonocardia	Pseudonocardia sp. EC080625-04	0	27	0	0	0	0	0	0	0	9	0	14	6	1	2	17	16
Bacteria	Actinobacteria	Actinomycetia	Pseudonocardiales	Pseudonocardiaceae	Pseudonocardia	Pseudonocardia sp. EV170527-09	71	83	0	142	2	86	43	14	7	123	80	97	176	195	45	52	68
Bacteria	Actinobacteria	Actinomycetia	Pseudonocardiales	Pseudonocardiaceae	Pseudonocardia	Pseudonocardia sp. HH130629-09	15	51	2	2	27	84	13	16	42	86	2	50	255	35	58	43	61
Bacteria	Actinobacteria	Actinomycetia	Pseudonocardiales	Pseudonocardiaceae	Pseudonocardia	Pseudonocardia sp. HH130630-07	98	263	7	248	169	296	48	44	94	343	113	158	513	612	184	123	110
Bacteria	Actinobacteria	Actinomycetia	Pseudonocardiales	Pseudonocardiaceae	Pseudonocardia	Pseudonocardia sp. ICBG1122	2	82	1	90	2	0	16	12	38	147	40	31	72	3	82	44	123
Bacteria	Actinobacteria	Actinomycetia	Pseudonocardiales	Pseudonocardiaceae	Pseudonocardia	Pseudonocardia sp. K10HN5	279	471	29	156	383	922	139	114	284	1054	151	85	1653	1401	1739	159	582
Bacteria	Actinobacteria	Actinomycetia	Pseudonocardiales	Pseudonocardiaceae	Pseudonocardia	Pseudonocardia sp. MH-G8	98	316	19	244	324	624	105	99	66	543	129	172	1442	1341	1497	195	583
Bacteria	Actinobacteria	Actinomycetia	Pseudonocardiales	Pseudonocardiaceae	Pseudonocardia	Pseudonocardia sp. N23	93	133	7	205	85	257	74	57	76	214	35	104	452	365	796	109	212
Bacteria	Actinobacteria	Actinomycetia	Pseudonocardiales	Pseudonocardiaceae	Pseudonocardia	Pseudonocardia sp. P2	25	99	1	199	37	63	15	59	31	147	21	31	278	75	183	53	52
Bacteria	Actinobacteria	Actinomycetia	Pseudonocardiales	Pseudonocardiaceae	Pseudonocardia	Pseudonocardia sp. SCN 72-86	53	117	8	119	77	291	26	56	94	91	25	19	305	521	421	45	318
Bacteria	Actinobacteria	Actinomycetia	Pseudonocardiales	Pseudonocardiaceae	Pseudonocardia	Pseudonocardia sp. SCN 73-27	0	12	0	0	16	22	10	10	20	46	1	0	85	1	11	11	25
Bacteria	Actinobacteria	Actinomycetia	Pseudonocardiales	Pseudonocardiaceae	Pseudonocardia	Pseudonocardia sp. SID8383	10	54	1	24	0	20	0	0	0	11	0	0	32	29	135	17	1
Bacteria	Actinobacteria	Actinomycetia	Pseudonocardiales	Pseudonocardiaceae	Pseudonocardia	Pseudonocardia sp.	0	2	0	0	0	17	0	2	0	42	0	0	0	1	19	12	1
Bacteria	Actinobacteria	Actinomycetia	Pseudonocardiales	Pseudonocardiaceae	Pseudonocardia	Pseudonocardia spinosispora	123	211	18	146	447	939	74	113	159	638	146	184	1123	1351	919	147	287
Bacteria	Actinobacteria	Actinomycetia	Pseudonocardiales	Pseudonocardiaceae	Pseudonocardia	Pseudonocardia sulfidoxydans	46	85	6	113	54	165	41	50	56	298	19	0	417	196	577	56	196
Bacteria	Actinobacteria	Actinomycetia	Pseudonocardiales	Pseudonocardiaceae	Pseudonocardia	Pseudonocardia thermophila	227	228	51	205	232	92	89	54	150	703	142	121	590	949	997	182	415
Bacteria	Actinobacteria	Actinomycetia	Pseudonocardiales	Pseudonocardiaceae	Pseudonocardia	Pseudonocardia xinjiangensis	230	453	31	401	885	365	150	186	166	1503	171	167	1715	1622	2624	315	672
Bacteria	Actinobacteria	Actinomycetia	Pseudonocardiales	Pseudonocardiaceae	Pseudonocardia	uncultured Pseudonocardia sp.	295	514	13	554	287	367	232	303	175	958	160	387	1499	907	1053	425	504
Bacteria	Actinobacteria	Actinomycetia	Streptomycetales	Streptomycetaceae	Streptomyces	Streptacidiphilus griseoplanus	22	113	5	47	15	97	16	50	146	126	67	151	193	221	95	83	204
Bacteria	Actinobacteria	Actinomycetia	Streptomycetales	Streptomycetaceae	Streptomyces	Streptomyces abikoensis	23	46	6	15	73	12	8	5	28	72	0	28	90	11	17	17	95
Bacteria	Actinobacteria	Actinomycetia	Streptomycetales	Streptomycetaceae	Streptomyces	Streptomyces abyssalis	12	26	0	0	7	15	2	0	1	22	9	2	68	151	0	16	18
Bacteria	Actinobacteria	Actinomycetia	Streptomycetales	Streptomycetaceae	Streptomyces	Streptomyces abyssomicinicus	60	117	0	33	51	136	10	57	37	97	25	46	92	142	78	65	177
Bacteria	Actinobacteria	Actinomycetia	Streptomycetales	Streptomycetaceae	Streptomyces	Streptomyces achromogenes	58	101	4	83	56	195	12	51	18	138	61	131	137	278	98	90	250
Bacteria	Actinobacteria	Actinomycetia	Streptomycetales	Streptomycetaceae	Streptomyces	Streptomyces acidiscabies	112	159	5	92	182	163	50	46	89	444	100	109	438	312	301	220	585
Bacteria	Actinobacteria	Actinomycetia	Streptomycetales	Streptomycetaceae	Streptomyces	Streptomyces actinomycinicus	53	39	1	96	0	105	6	16	59	85	6	17	196	148	26	57	86
Bacteria	Actinobacteria	Actinomycetia	Streptomycetales	Streptomycetaceae	Streptomyces	Streptomyces actuosus	12	0	0	1	0	57	9	0	0	66	0	0	25	0	35	14	0
Bacteria	Actinobacteria	Actinomycetia	Streptomycetales	Streptomycetaceae	Streptomyces	Streptomyces adustus	3	78	2	11	55	224	52	122	62	97	31	51	226	293	30	74	162
Bacteria	Actinobacteria	Actinomycetia	Streptomycetales	Streptomycetaceae	Streptomyces	Streptomyces afghaniensis	48	63	2	24	22	77	15	48	43	204	28	62	185	61	66	46	259
Bacteria	Actinobacteria	Actinomycetia	Streptomycetales	Streptomycetaceae	Streptomyces	Streptomyces africanus	37	41	2	65	5	32	19	8	34	60	0	0	35	47	42	14	53
Bacteria	Actinobacteria	Actinomycetia	Streptomycetales	Streptomycetaceae	Streptomyces	Streptomyces agglomeratus	21	72	1	82	154	173	26	33	19	202	37	40	311	230	160	113	78
Bacteria	Actinobacteria	Actinomycetia	Streptomycetales	Streptomycetaceae	Streptomyces	Streptomyces aidingensis	63	264	27	165	154	95	66	110	113	302	74	101	485	648	78	55	214
Bacteria	Actinobacteria	Actinomycetia	Streptomycetales	Streptomycetaceae	Streptomyces	Streptomyces alanosinicus	52	141	2	28	16	92	18	26	83	266	5	48	248	229	244	103	153
Bacteria	Actinobacteria	Actinomycetia	Streptomycetales	Streptomycetaceae	Streptomyces	Streptomyces albaduncus	0	58	0	11	7	1	7	6	38	7	16	56	119	69	89	18	20
Bacteria	Actinobacteria	Actinomycetia	Streptomycetales	Streptomycetaceae	Streptomyces	Streptomyces albicerus	21	129	2	103	23	131	13	12	10	251	57	69	79	63	26	105	151
Bacteria	Actinobacteria	Actinomycetia	Streptomycetales	Streptomycetaceae	Streptomyces	Streptomyces albidochromogenes	2	26	0	0	39	20	14	8	12	110	2	0	73	69	70	17	113
Bacteria	Actinobacteria	Actinomycetia	Streptomycetales	Streptomycetaceae	Streptomyces	Streptomyces albidoflavus	3117	2201	2044	778	1941	592	1298	2044	106	454	170	125	562	490	310	170	306
Bacteria	Actinobacteria	Actinomycetia	Streptomycetales	Streptomycetaceae	Streptomyces	Streptomyces albiflavescens	84	240	226	36	240	48	8	4	31	73	9	25	209	606	229	56	75
Bacteria	Actinobacteria	Actinomycetia	Streptomycetales	Streptomycetaceae	Streptomyces	Streptomyces albireticuli	48	185	8	164	143	170	33	46	87	248	56	201	245	211	125	158	15
Bacteria	Actinobacteria	Actinomycetia	Streptomycetales	Streptomycetaceae	Streptomyces	Streptomyces albofaciens	30	41	0	73	44	79	4	27	5	97	29	2	84	119	100	55	31
Bacteria	Actinobacteria	Actinomycetia	Streptomycetales	Streptomycetaceae	Streptomyces	Streptomyces alboflavus	169	123	26	94	55	312	70	41	89	188	91	70	277	286	137	110	193
Bacteria	Actinobacteria	Actinomycetia	Streptomycetales	Streptomycetaceae	Streptomyces	Streptomyces albogriseolus	6	27	0	1	1	0	4	23	43	43	7	0	3	32	4	5	9
Bacteria	Actinobacteria	Actinomycetia	Streptomycetales	Streptomycetaceae	Streptomyces	Streptomyces alboniger	14	44	0	24	14	64	7	31	12	64	8	44	51	46	131	35	1
Bacteria	Actinobacteria	Actinomycetia	Streptomycetales	Streptomycetaceae	Streptomyces	Streptomyces albospinus	26	226	16	114	56	201	35	23	50	198	36	20	213	800	206	117	490
Bacteria	Actinobacteria	Actinomycetia	Streptomycetales	Streptomycetaceae	Streptomyces	Streptomyces alboverticillatus	20	114	0	37	12	12	40	6	79	270	37	89	171	144	107	74	78
Bacteria	Actinobacteria	Actinomycetia	Streptomycetales	Streptomycetaceae	Streptomyces	Streptomyces albovinaceus	0	0	0	0	0	0	1	0	0	14	1	0	1	0	0	8	0
Bacteria	Actinobacteria	Actinomycetia	Streptomycetales	Streptomycetaceae	Streptomyces	Streptomyces albulus	129	239	29	260	143	534	114	113	145	604	155	249	775	669	454	282	289
Bacteria	Actinobacteria	Actinomycetia	Streptomycetales	Streptomycetaceae	Streptomyces	Streptomyces albus	325	566	6	269	347	922	196	147	363	913	169	242	1280	1722	808	464	435
Bacteria	Actinobacteria	Actinomycetia	Streptomycetales	Streptomycetaceae	Streptomyces	Streptomyces alfalfae	0	12	0	1	16	69	3	1	1	46	10	57	13	38	2	1	2
Bacteria	Actinobacteria	Actinomycetia	Streptomycetales	Streptomycetaceae	Streptomyces	Streptomyces alkaliphilus	81	130	4	13	40	97	40	33	49	129	71	1	96	398	118	96	71
Bacteria	Actinobacteria	Actinomycetia	Streptomycetales	Streptomycetaceae	Streptomyces	Streptomyces alkaliterrae	11	33	0	49	3	18	13	13	14	55	28	47	55	274	95	41	134
Bacteria	Actinobacteria	Actinomycetia	Streptomycetales	Streptomycetaceae	Streptomyces	Streptomyces alni	52	80	0	74	187	302	41	46	43	128	37	1	240	361	167	78	258
Bacteria	Actinobacteria	Actinomycetia	Streptomycetales	Streptomycetaceae	Streptomyces	Streptomyces althioticus	29	33	0	1	0	15	0	1	48	68	18	0	5	27	0	26	2
Bacteria	Actinobacteria	Actinomycetia	Streptomycetales	Streptomycetaceae	Streptomyces	Streptomyces ambofaciens	26	61	3	24	12	100	63	38	64	237	27	29	181	92	149	135	78
Bacteria	Actinobacteria	Actinomycetia	Streptomycetales	Streptomycetaceae	Streptomyces	Streptomyces amritsarensis	11	17	0	0	0	2	3	11	12	6	0	26	37	1	0	9	65
Bacteria	Actinobacteria	Actinomycetia	Streptomycetales	Streptomycetaceae	Streptomyces	Streptomyces anandii	41	65	5	35	1	188	5	3	48	82	8	22	125	55	93	35	264
Bacteria	Actinobacteria	Actinomycetia	Streptomycetales	Streptomycetaceae	Streptomyces	Streptomyces angustmyceticus	40	9	1	56	49	80	14	14	28	154	31	77	178	105	49	80	34
Bacteria	Actinobacteria	Actinomycetia	Streptomycetales	Streptomycetaceae	Streptomyces	Streptomyces ansochromogenes	0	0	0	0	0	0	0	5	0	0	0	0	0	55	0	28	0
Bacteria	Actinobacteria	Actinomycetia	Streptomycetales	Streptomycetaceae	Streptomyces	Streptomyces anthocyanicus	0	0	0	10	3	0	0	7	0	0	10	0	18	0	4	6	0
Bacteria	Actinobacteria	Actinomycetia	Streptomycetales	Streptomycetaceae	Streptomyces	Streptomyces antibioticus	67	87	1	44	52	116	26	26	82	130	55	55	258	151	155	77	146
Bacteria	Actinobacteria	Actinomycetia	Streptomycetales	Streptomycetaceae	Streptomyces	Streptomyces antimycoticus	26	146	9	113	192	311	36	138	13	204	73	82	629	372	277	123	125
Bacteria	Actinobacteria	Actinomycetia	Streptomycetales	Streptomycetaceae	Streptomyces	Streptomyces antioxidans	16	77	1	48	21	63	42	53	27	54	33	66	250	232	56	63	137
Bacteria	Actinobacteria	Actinomycetia	Streptomycetales	Streptomycetaceae	Streptomyces	Streptomyces anulatus	178	391	3	522	117	266	158	119	107	435	184	255	667	322	209	218	363
Bacteria	Actinobacteria	Actinomycetia	Streptomycetales	Streptomycetaceae	Streptomyces	Streptomyces aquilus	23	0	0	9	0	0	5	12	1	10	0	0	2	4	0	13	4
Bacteria	Actinobacteria	Actinomycetia	Streptomycetales	Streptomycetaceae	Streptomyces	Streptomyces argenteolus	65	50	1	20	42	67	32	0	47	228	6	43	235	12	38	63	110
Bacteria	Actinobacteria	Actinomycetia	Streptomycetales	Streptomycetaceae	Streptomyces	Streptomyces armeniacus	25	128	1	124	144	307	51	33	83	374	81	14	485	751	221	84	334
Bacteria	Actinobacteria	Actinomycetia	Streptomycetales	Streptomycetaceae	Streptomyces	Streptomyces asterosporus	0	1	0	0	8	0	0	1	18	17	0	4	0	1	0	5	0
Bacteria	Actinobacteria	Actinomycetia	Streptomycetales	Streptomycetaceae	Streptomyces	Streptomyces atratus	109	160	4	181	144	612	47	50	105	208	68	163	259	358	240	137	207
Bacteria	Actinobacteria	Actinomycetia	Streptomycetales	Streptomycetaceae	Streptomyces	Streptomyces atriruber	17	92	1	159	128	1	15	55	24	65	24	6	113	121	0	38	10
Bacteria	Actinobacteria	Actinomycetia	Streptomycetales	Streptomycetaceae	Streptomyces	Streptomyces atroolivaceus	0	101	2	122	52	67	31	40	1	119	6	35	66	89	81	27	41
Bacteria	Actinobacteria	Actinomycetia	Streptomycetales	Streptomycetaceae	Streptomyces	Streptomyces aurantiacus	28	82	2	25	23	136	22	33	31	140	12	150	312	126	73	63	28
Bacteria	Actinobacteria	Actinomycetia	Streptomycetales	Streptomycetaceae	Streptomyces	Streptomyces aurantiogriseus	14	51	0	2	53	34	36	17	50	217	37	136	67	194	138	53	155
Bacteria	Actinobacteria	Actinomycetia	Streptomycetales	Streptomycetaceae	Streptomyces	Streptomyces auratus	0	29	1	32	1	4	0	0	1	115	1	32	191	531	71	8	15
Bacteria	Actinobacteria	Actinomycetia	Streptomycetales	Streptomycetaceae	Streptomyces	Streptomyces aureocirculatus	14	91	0	25	60	230	71	51	43	142	24	31	188	249	153	86	131
Bacteria	Actinobacteria	Actinomycetia	Streptomycetales	Streptomycetaceae	Streptomyces	Streptomyces aureorectus	0	11	0	0	0	0	0	0	0	0	0	0	0	0	0	1	0
Bacteria	Actinobacteria	Actinomycetia	Streptomycetales	Streptomycetaceae	Streptomyces	Streptomyces aureoverticillatus	174	352	3	362	107	315	82	273	256	653	156	140	529	177	348	405	347
Bacteria	Actinobacteria	Actinomycetia	Streptomycetales	Streptomycetaceae	Streptomyces	Streptomyces aureus	27	48	3	143	51	121	17	29	31	95	24	23	127	119	93	79	118
Bacteria	Actinobacteria	Actinomycetia	Streptomycetales	Streptomycetaceae	Streptomyces	Streptomyces avermitilis	31	153	1	9	87	101	63	81	119	314	51	280	357	198	161	119	364
Bacteria	Actinobacteria	Actinomycetia	Streptomycetales	Streptomycetaceae	Streptomyces	Streptomyces avicenniae	50	105	2	99	80	220	20	34	37	242	87	110	134	199	105	30	181
Bacteria	Actinobacteria	Actinomycetia	Streptomycetales	Streptomycetaceae	Streptomyces	Streptomyces avidinii	58	74	1	37	45	41	14	13	0	28	1	51	89	45	19	24	144
Bacteria	Actinobacteria	Actinomycetia	Streptomycetales	Streptomycetaceae	Streptomyces	Streptomyces azureus	12	39	5	9	4	39	15	17	34	119	27	12	42	99	92	55	25
Bacteria	Actinobacteria	Actinomycetia	Streptomycetales	Streptomycetaceae	Streptomyces	Streptomyces baarnensis	0	6	0	0	0	10	0	0	11	46	0	54	7	14	11	3	0
Bacteria	Actinobacteria	Actinomycetia	Streptomycetales	Streptomycetaceae	Streptomyces	Streptomyces badius	0	13	0	0	1	51	13	17	18	48	0	0	75	27	0	11	34
Bacteria	Actinobacteria	Actinomycetia	Streptomycetales	Streptomycetaceae	Streptomyces	Streptomyces barkulensis	20	16	0	64	1	1	8	18	7	103	0	7	27	103	35	13	92
Bacteria	Actinobacteria	Actinomycetia	Streptomycetales	Streptomycetaceae	Streptomyces	Streptomyces bauhiniae	25	51	0	1	7	41	7	59	2	69	16	47	73	46	45	69	35
Bacteria	Actinobacteria	Actinomycetia	Streptomycetales	Streptomycetaceae	Streptomyces	Streptomyces bellus	10	33	1	0	2	65	22	1	36	138	20	5	75	64	106	10	41
Bacteria	Actinobacteria	Actinomycetia	Streptomycetales	Streptomycetaceae	Streptomyces	Streptomyces bicolor	11	68	9	20	55	54	23	17	12	71	1	1	34	73	54	10	50
Bacteria	Actinobacteria	Actinomycetia	Streptomycetales	Streptomycetaceae	Streptomyces	Streptomyces bikiniensis	0	34	0	1	7	39	12	29	16	42	0	24	50	92	1	50	5
Bacteria	Actinobacteria	Actinomycetia	Streptomycetales	Streptomycetaceae	Streptomyces	Streptomyces bingchenggensis	0	82	0	9	62	87	21	5	4	50	1	37	69	56	65	47	150
Bacteria	Actinobacteria	Actinomycetia	Streptomycetales	Streptomycetaceae	Streptomyces	Streptomyces bobili	0	2	0	1	0	2	8	19	0	17	3	0	8	1	1	12	1
Bacteria	Actinobacteria	Actinomycetia	Streptomycetales	Streptomycetaceae	Streptomyces	Streptomyces bohaiensis	41	182	50	67	110	94	20	25	98	234	41	148	172	90	194	139	114
Bacteria	Actinobacteria	Actinomycetia	Streptomycetales	Streptomycetaceae	Streptomyces	Streptomyces boluensis	4	23	5	49	44	67	19	22	37	87	22	4	145	447	32	58	2
Bacteria	Actinobacteria	Actinomycetia	Streptomycetales	Streptomycetaceae	Streptomyces	Streptomyces boncukensis	67	119	3	34	103	344	1980	985	308	325	78	159	297	488	199	103	211
Bacteria	Actinobacteria	Actinomycetia	Streptomycetales	Streptomycetaceae	Streptomyces	Streptomyces bottropensis	0	16	0	0	67	29	2	0	3	30	4	2	87	118	62	6	79
Bacteria	Actinobacteria	Actinomycetia	Streptomycetales	Streptomycetaceae	Streptomyces	Streptomyces brasiliensis	36	52	6	87	46	32	36	28	31	229	71	60	135	157	135	113	195
Bacteria	Actinobacteria	Actinomycetia	Streptomycetales	Streptomycetaceae	Streptomyces	Streptomyces brevispora	11	35	2	69	47	18	21	1	24	87	33	46	102	47	49	48	40
Bacteria	Actinobacteria	Actinomycetia	Streptomycetales	Streptomycetaceae	Streptomyces	Streptomyces broussonetiae	28	17	1	13	0	70	8	16	69	123	5	37	189	151	71	14	26
Bacteria	Actinobacteria	Actinomycetia	Streptomycetales	Streptomycetaceae	Streptomyces	Streptomyces buecherae	133	338	8	226	242	250	121	139	158	720	211	217	431	521	316	320	328
Bacteria	Actinobacteria	Actinomycetia	Streptomycetales	Streptomycetaceae	Streptomyces	Streptomyces bungoensis	1	75	2	11	17	86	21	10	3	163	41	60	172	304	71	134	68
Bacteria	Actinobacteria	Actinomycetia	Streptomycetales	Streptomycetaceae	Streptomyces	Streptomyces caatingaensis	79	107	1	74	46	66	53	65	14	276	65	63	219	140	245	96	68
Bacteria	Actinobacteria	Actinomycetia	Streptomycetales	Streptomycetaceae	Streptomyces	Streptomyces cacaoi	100	169	0	112	33	82	53	52	64	185	48	40	207	366	245	91	199
Bacteria	Actinobacteria	Actinomycetia	Streptomycetales	Streptomycetaceae	Streptomyces	Streptomyces cadmiisoli	14	2	0	12	22	3	1	19	25	3	2	16	53	110	7	21	43
Bacteria	Actinobacteria	Actinomycetia	Streptomycetales	Streptomycetaceae	Streptomyces	Streptomyces caelestis	17026	37582	83	24967	12776	28450	12501	14045	19881	65198	15924	21060	51975	24293	34843	38784	42559
Bacteria	Actinobacteria	Actinomycetia	Streptomycetales	Streptomycetaceae	Streptomyces	Streptomyces caeruleatus	16	122	1	25	14	31	28	24	58	63	10	2	112	107	123	70	46
Bacteria	Actinobacteria	Actinomycetia	Streptomycetales	Streptomycetaceae	Streptomyces	Streptomyces calidiresistens	46	100	0	82	52	172	28	13	48	332	68	19	88	266	229	80	177
Bacteria	Actinobacteria	Actinomycetia	Streptomycetales	Streptomycetaceae	Streptomyces	Streptomyces californicus	0	0	0	0	0	0	0	0	0	1	3	0	21	15	46	1	0
Bacteria	Actinobacteria	Actinomycetia	Streptomycetales	Streptomycetaceae	Streptomyces	Streptomyces calvus	31	35	0	1	0	62	9	1	10	43	5	81	12	0	0	6	20
Bacteria	Actinobacteria	Actinomycetia	Streptomycetales	Streptomycetaceae	Streptomyces	Streptomyces camponoticapitis	41	83	2	51	29	77	22	34	13	78	23	37	219	103	70	35	56
Bacteria	Actinobacteria	Actinomycetia	Streptomycetales	Streptomycetaceae	Streptomyces	Streptomyces canarius	43	78	1	44	53	26	25	20	40	160	22	32	135	146	157	67	82
Bacteria	Actinobacteria	Actinomycetia	Streptomycetales	Streptomycetaceae	Streptomyces	Streptomyces candidus	32	147	2	23	1	96	74	26	126	121	28	90	130	39	156	80	149
Bacteria	Actinobacteria	Actinomycetia	Streptomycetales	Streptomycetaceae	Streptomyces	Streptomyces caniferus	69	112	1	121	79	31	46	57	40	239	19	38	181	146	99	117	16
Bacteria	Actinobacteria	Actinomycetia	Streptomycetales	Streptomycetaceae	Streptomyces	Streptomyces canus	71	65	3	40	44	134	33	39	40	185	28	51	264	244	143	97	318
Bacteria	Actinobacteria	Actinomycetia	Streptomycetales	Streptomycetaceae	Streptomyces	Streptomyces capillispiralis	3	18	4	12	99	16	4	35	16	115	32	42	98	100	3	48	105
Bacteria	Actinobacteria	Actinomycetia	Streptomycetales	Streptomycetaceae	Streptomyces	Streptomyces capitiformicae	11	39	0	71	3	38	18	23	15	114	25	49	216	130	106	96	62
Bacteria	Actinobacteria	Actinomycetia	Streptomycetales	Streptomycetaceae	Streptomyces	Streptomyces capoamus	0	0	0	56	0	0	0	4	0	1	0	8	1	0	0	2	0
Bacteria	Actinobacteria	Actinomycetia	Streptomycetales	Streptomycetaceae	Streptomyces	Streptomyces carminius	29	114	2	163	75	247	20	34	51	196	20	4	255	195	58	87	166
Bacteria	Actinobacteria	Actinomycetia	Streptomycetales	Streptomycetaceae	Streptomyces	Streptomyces carpinensis	67	121	0	26	37	116	15	19	72	160	28	117	222	126	49	69	134
Bacteria	Actinobacteria	Actinomycetia	Streptomycetales	Streptomycetaceae	Streptomyces	Streptomyces catenulae	2	55	2	7	60	9	15	7	29	76	42	1	148	28	228	41	115
Bacteria	Actinobacteria	Actinomycetia	Streptomycetales	Streptomycetaceae	Streptomyces	Streptomyces cattleya	4	70	2	126	51	119	33	51	50	121	47	123	91	109	85	40	43
Bacteria	Actinobacteria	Actinomycetia	Streptomycetales	Streptomycetaceae	Streptomyces	Streptomyces cavernae	65	95	0	67	1	110	28	8	3	72	62	2	200	349	27	70	37
Bacteria	Actinobacteria	Actinomycetia	Streptomycetales	Streptomycetaceae	Streptomyces	Streptomyces cavourensis	16	33	0	29	10	0	13	0	4	101	21	0	67	54	81	30	64
Bacteria	Actinobacteria	Actinomycetia	Streptomycetales	Streptomycetaceae	Streptomyces	Streptomyces cellostaticus	86	86	0	86	5	135	42	7	1	124	31	38	133	121	101	38	116
Bacteria	Actinobacteria	Actinomycetia	Streptomycetales	Streptomycetaceae	Streptomyces	Streptomyces cellulosae	70	84	1	53	19	53	22	48	66	105	48	24	114	230	55	49	132
Bacteria	Actinobacteria	Actinomycetia	Streptomycetales	Streptomycetaceae	Streptomyces	Streptomyces chartreusis	36	147	2	88	74	120	38	85	47	125	24	19	162	262	194	50	198
[truncated: 14,133 more rows]

## Sheet: Suppl. Table 5
Supplementary Table 5 List of singletons and species only present in one sample removed from taxonomy table generated from metagenomic profiling. Samples collected from Pisciarelli large pool are denoted by PLP, Pisciarelli small pool by PSP, Pisciarelli fumarole by PF, Solfatara mud pool by SMP, and Solfatara fumarole by SF. W represents water, M for mud, MO for mud outlet, E for green epilithic…
							Pisciarelli										Solfatara
Domain	Phylum	Class	Order	Family	Genus	Species	PLP-W (temp: 84.1 °C, pH: 2.5)	PLP-M_a (temp: 84.1 °C, pH: 2.5)	PLP-M_b (temp: 84.1 °C, pH: 2.5)	PLP-MO_a (temp: 78.9 °C, pH: 2.5)	PLP-MO_b (temp: 78.9 °C, pH: 2.5)	PLP-E (temp: 74 °C, pH: NA)	PSP-W_a (temp: 88.8 °C, pH: 1.5)	PSP-W_b (temp: 88.8 °C, pH: 1.5)	PSP-M (temp: 94.6 °C, pH: 2)	PF-D (temp: 93.3 °C, pH: 1.5)	SMP-W_a (temp: 42.5 °C, pH: 1)	SMP-W_b (temp: 42.5 °C, pH: 1)	SMP-M_a1 (temp: 68.8 °C, pH: 1)	SMP-M_a1.2 (temp: 68.8 °C, pH: 1)	SMP-M_b (temp: 68.8 °C, pH: 1)	SF-D_a (temp: 88.7 °C, pH: 1)	SF-D_b (temp: 88.7 °C, pH: 1)
Archaea	Euryarchaeota	Halobacteria	Haloferacales	Haloferacaceae	Haloferax	Haloferax sp. Atlit-6N	0	0	0	0	0	0	0	0	0	0	0	0	0	0	0	1	0
Archaea	Euryarchaeota	NA	NA	NA	NA	uncultured marine group II/III euryarchaeote AD1000_104_H03	0	0	0	0	0	0	0	0	0	0	0	0	0	0	0	2	0
Archaea	Euryarchaeota	NA	NA	NA	NA	uncultured marine group II/III euryarchaeote KM3_155_E06	0	0	0	0	0	0	0	0	0	0	0	0	0	0	0	1	0
Archaea	Thaumarchaeota	NA	NA	NA	NA	Thaumarchaeota archaeon 13_1_20CM_2_39_20	0	0	0	0	0	0	0	0	0	0	0	0	0	0	0	1	0
Archaea	Thaumarchaeota	NA	NA	NA	NA	uncultured marine thaumarchaeote AD1000_39_D08	0	0	0	0	0	0	0	0	0	0	0	0	0	0	0	1	0
Bacteria	Acidobacteria	NA	NA	NA	NA	uncultured Acidobacteria bacterium A3	0	0	0	0	0	0	0	0	0	0	0	0	0	0	0	1	0
Bacteria	Actinobacteria	Actinomycetia	Bifidobacteriales	Bifidobacteriaceae	NA	Bifidobacteriaceae bacterium VN002	0	0	0	0	0	0	0	0	0	0	0	0	0	0	0	2	0
Bacteria	Actinobacteria	Actinomycetia	Frankiales	Frankiaceae	Frankia	Frankia sp. CH37	0	0	0	0	0	0	0	0	0	0	0	0	0	0	0	2	0
Bacteria	Actinobacteria	Actinomycetia	Micrococcales	Microbacteriaceae	Candidatus Aquiluna	Candidatus Aquiluna rubra	0	0	0	0	0	0	0	0	0	0	0	0	0	0	0	4	0
Bacteria	Actinobacteria	Actinomycetia	Micrococcales	Microbacteriaceae	Frigoribacterium	Frigoribacterium sp. Leaf8	0	0	0	0	0	0	0	0	0	0	0	0	0	0	0	12	0
Bacteria	Actinobacteria	Actinomycetia	Micrococcales	Microbacteriaceae	Plantibacter	Plantibacter sp. CFBP 13570	0	0	0	0	0	0	0	0	0	0	0	0	0	0	0	5	0
Bacteria	Actinobacteria	Actinomycetia	Micrococcales	Micrococcaceae	Glutamicibacter	Glutamicibacter sp. 0426	0	0	0	0	0	0	0	0	0	0	0	0	0	0	0	6	0
Bacteria	Actinobacteria	Actinomycetia	NA	NA	NA	Actinobacteria bacterium BACL2 MAG-120813-bin23	0	0	0	0	0	0	0	0	0	0	0	0	0	0	0	2	0
Bacteria	Actinobacteria	Actinomycetia	Streptosporangiales	Streptosporangiaceae	Streptosporangium	Streptosporangium jomthongense	0	0	0	0	0	0	0	0	0	0	0	0	0	0	0	1	0
Bacteria	Actinobacteria	Coriobacteriia	Eggerthellales	Eggerthellaceae	Adlercreutzia	Adlercreutzia sp. 8CFCBH1	0	0	0	0	0	0	0	0	0	0	0	0	0	0	0	1	0
Bacteria	Bacteroidetes	Cytophagia	Cytophagales	NA	NA	Cytophagales bacterium CG17_big_fil_post_rev_8_21_14_2_50_40_13	0	0	0	0	0	0	0	0	0	0	0	0	0	0	0	1	0
Bacteria	Candidatus Collierbacteria	NA	NA	NA	NA	Candidatus Collierbacteria bacterium CG09_land_8_20_14_0_10_46_12	0	0	0	0	0	0	0	0	0	0	0	0	0	0	0	12	0
Bacteria	Candidatus Collierbacteria	NA	NA	NA	NA	Candidatus Collierbacteria bacterium GW2011_GWA2_44_99	0	0	0	0	0	0	0	0	0	0	0	0	0	0	0	1	0
Bacteria	Candidatus Collierbacteria	NA	NA	NA	NA	Candidatus Collierbacteria bacterium GW2011_GWC2_43_12	0	0	0	0	0	0	0	0	0	0	0	0	0	0	0	7	0
Bacteria	Candidatus Falkowbacteria	NA	NA	NA	NA	Candidatus Falkowbacteria bacterium CG1_02_41_21	0	0	0	0	0	0	0	0	0	0	0	0	0	0	0	1	0
Bacteria	Candidatus Moranbacteria	NA	NA	NA	NA	Candidatus Moranbacteria bacterium CG23_combo_of_CG06-09_8_20_14_all_41_28	0	0	0	0	0	0	0	0	0	0	0	0	0	0	0	1	0
Bacteria	Candidatus Nealsonbacteria	NA	NA	NA	NA	Candidatus Nealsonbacteria bacterium RIFCSPHIGHO2_01_FULL_38_55	0	0	0	0	0	0	0	0	0	0	0	0	0	0	0	7	0
Bacteria	Candidatus Nomurabacteria	NA	NA	NA	NA	Candidatus Nomurabacteria bacterium RIFCSPLOWO2_01_FULL_37_49	0	0	0	0	0	0	0	0	0	0	0	0	0	0	0	1	0
Bacteria	Candidatus Peregrinibacteria	NA	NA	NA	NA	Candidatus Peregrinibacteria bacterium CG10_big_fil_rev_8_21_14_0_10_49_24	0	0	0	0	0	0	0	0	0	0	0	0	0	0	0	20	0
Bacteria	Candidatus Roizmanbacteria	NA	NA	NA	NA	Candidatus Roizmanbacteria bacterium RIFCSPHIGHO2_01_FULL_39_24	0	0	0	0	0	0	0	0	0	0	0	0	0	0	0	3	0
Bacteria	Candidatus Rokubacteria	NA	NA	NA	NA	Candidatus Rokubacteria bacterium 13_1_20CM_2_68_19	0	0	0	0	0	0	0	0	0	0	0	0	0	0	0	6	0
Bacteria	Candidatus Woesebacteria	NA	NA	NA	NA	Candidatus Woesebacteria bacterium RIFCSPHIGHO2_01_FULL_44_10	0	0	0	0	0	0	0	0	0	0	0	0	0	0	0	1	0
Bacteria	Cyanobacteria	NA	Nostocales	Nostocaceae	Anabaena	Anabaena sp. XPORK15F	0	0	0	0	0	0	0	0	0	0	0	0	0	0	0	1	0
Bacteria	Cyanobacteria	NA	Synechococcales	Prochloraceae	Prochlorococcus	Prochlorococcus sp. HOT208_60m_808G21	0	0	0	0	0	0	0	0	0	0	0	0	0	0	0	1	0
Bacteria	Cyanobacteria	NA	Synechococcales	Prochloraceae	Prochlorococcus	Prochlorococcus sp. HOT212_60m_824C06	0	0	0	0	0	0	0	0	0	0	0	0	0	0	0	14	0
Bacteria	Cyanobacteria	NA	Synechococcales	Pseudanabaenaceae	Pseudanabaena	Pseudanabaena sp. LEGE 06194	0	0	0	0	0	0	0	0	0	0	0	0	0	0	0	1	0
Bacteria	Deinococcus-Thermus	NA	NA	NA	NA	uncultured Thermus/Deinococcus group bacterium	0	0	0	0	0	0	0	0	0	0	0	0	0	0	0	1	0
Bacteria	Firmicutes	Bacilli	Bacillales	NA	Exiguobacterium	Exiguobacterium sp. SH5S13	0	0	0	0	0	0	0	0	0	0	0	0	0	0	0	7	0
Bacteria	Firmicutes	Bacilli	Lactobacillales	Lactobacillaceae	Companilactobacillus	Companilactobacillus paralimentarius	0	0	0	0	0	0	0	0	0	0	0	0	0	0	0	2	0
Bacteria	Firmicutes	Clostridia	Clostridiales	Ruminococcaceae	Anaerotruncus	Anaerotruncus sp. 1XD42-93	0	0	0	0	0	0	0	0	0	0	0	0	0	0	0	4	0
Bacteria	Firmicutes	Clostridia	Halanaerobiales	Halanaerobiaceae	Halanaerobium	Halanaerobium sp. MDAL1	0	0	0	0	0	0	0	0	0	0	0	0	0	0	0	15	0
Bacteria	Firmicutes	NA	NA	NA	NA	Firmicutes bacterium enrichment culture clone fosmid MGS-M2	0	0	0	0	0	0	0	0	0	0	0	0	0	0	0	8	0
Bacteria	NA	NA	NA	NA	NA	Parcubacteria group bacterium GW2011_GWC1_43_61	0	0	0	0	0	0	0	0	0	0	0	0	0	0	0	1	0
Bacteria	NA	NA	NA	NA	NA	symbiont bacterium of Axinella verrucosa	0	0	0	0	0	0	0	0	0	0	0	0	0	0	0	3	0
Bacteria	NA	NA	NA	NA	NA	uncultured bacterium A1Q1_fos_560	0	0	0	0	0	0	0	0	0	0	0	0	0	0	0	1	0
Bacteria	NA	NA	NA	NA	NA	uncultured bacterium Contig1758	0	0	0	0	0	0	0	0	0	0	0	0	0	0	0	1	0
Bacteria	NA	NA	NA	NA	NA	uncultured bacterium FLS18	0	0	0	0	0	0	0	0	0	0	0	0	0	0	0	2	0
Bacteria	NA	NA	NA	NA	NA	uncultured bacterium psy1	0	0	0	0	0	0	0	0	0	0	0	0	0	0	0	24	0
Bacteria	NA	NA	NA	NA	NA	uncultured bacterium TB303_p	0	0	0	0	0	0	0	0	0	0	0	0	0	0	0	1	0
Bacteria	NA	NA	NA	NA	NA	uncultured bacterium UPO74	0	0	0	0	0	0	0	0	0	0	0	0	0	0	0	1	0
Bacteria	NA	NA	NA	NA	NA	uncultured marine bacterium PPT_M2	0	0	0	0	0	0	0	0	0	0	0	0	0	0	0	3	0
Bacteria	NA	NA	NA	NA	NA	uncultured nuHF2 cluster bacterium HF0770_13K08	0	0	0	0	0	0	0	0	0	0	0	0	0	0	0	1	0
Bacteria	Nitrospirae	NA	NA	NA	NA	uncultured Nitrospirae bacterium	0	0	0	0	0	0	0	0	0	0	0	0	0	0	0	1	0
Bacteria	Planctomycetes	Planctomycetia	Planctomycetales	NA	NA	uncultured Planctomycetales bacterium HF0200_11L05	0	0	0	0	0	0	0	0	0	0	0	0	0	0	0	1	0
Bacteria	Proteobacteria	Alphaproteobacteria	NA	NA	NA	uncultured marine alpha proteobacterium HOT2C01	0	0	0	0	0	0	0	0	0	0	0	0	0	0	0	1	0
Bacteria	Proteobacteria	Alphaproteobacteria	Pelagibacterales	Pelagibacteraceae	NA	Pelagibacteraceae bacterium TMED246	0	0	0	0	0	0	0	0	0	0	0	0	0	0	0	1	0
Bacteria	Proteobacteria	Alphaproteobacteria	Rhizobiales	Bartonellaceae	Bartonella	Bartonella sp. W8097	0	0	0	0	0	0	0	0	0	0	0	0	0	0	0	2	0
Bacteria	Proteobacteria	Alphaproteobacteria	Rhizobiales	Brucellaceae	Brucella	Brucella sp. 09RB8910	0	0	0	0	0	0	0	0	0	0	0	0	0	0	0	8	0
Bacteria	Proteobacteria	Alphaproteobacteria	Rhizobiales	Methylocystaceae	Methylosinus	Methylosinus sp. 3S-1	0	0	0	0	0	0	0	0	0	0	0	0	0	0	0	1	0
Bacteria	Proteobacteria	Alphaproteobacteria	Rhizobiales	Rhizobiaceae	Sinorhizobium	Sinorhizobium sp. LM21	0	0	0	0	0	0	0	0	0	0	0	0	0	0	0	1	0
Bacteria	Proteobacteria	Alphaproteobacteria	Rhodospirillales	Acetobacteraceae	Saccharibacter	Saccharibacter sp. 3.A.1	0	0	0	0	0	0	0	0	0	0	0	0	0	0	0	1	0
Bacteria	Proteobacteria	Alphaproteobacteria	Rickettsiales	Anaplasmataceae	Wolbachia	Wolbachia endosymbiont of Cardiocondyla obscurior	0	0	0	0	0	0	0	0	0	0	0	0	0	0	0	3	0
Bacteria	Proteobacteria	Alphaproteobacteria	Rickettsiales	Anaplasmataceae	Wolbachia	Wolbachia endosymbiont of Trichogramma pretiosum	0	0	0	0	0	0	0	0	0	0	0	0	0	0	0	5	0
Bacteria	Proteobacteria	Alphaproteobacteria	Rickettsiales	Rickettsiaceae	Candidatus Megaira	Candidatus Megaira polyxenophila	0	0	0	0	0	0	0	0	0	0	0	0	0	0	0	1	0
Bacteria	Proteobacteria	Betaproteobacteria	Burkholderiales	Burkholderiaceae	Polynucleobacter	Polynucleobacter sp. 35-46-207	0	0	0	0	0	0	0	0	0	0	0	0	0	0	0	11	0
Bacteria	Proteobacteria	Betaproteobacteria	Nitrosomonadales	Gallionellaceae	Sideroxydans	uncultured Sideroxydans sp.	0	0	0	0	0	0	0	0	0	0	0	0	0	0	0	1	0
Bacteria	Proteobacteria	Epsilonproteobacteria	NA	NA	NA	Epsilonproteobacteria bacterium SCGC AD-311-E16	0	0	0	0	0	0	0	0	0	0	0	0	0	0	0	1	0
Bacteria	Proteobacteria	Gammaproteobacteria	Alteromonadales	Colwelliaceae	Colwellia	Colwellia sp. BRX10-6	0	0	0	0	0	0	0	0	0	0	0	0	0	0	0	1	0
Bacteria	Proteobacteria	Gammaproteobacteria	Alteromonadales	Pseudoalteromonadaceae	Pseudoalteromonas	Pseudoalteromonas porphyrae	0	0	0	0	0	0	0	0	0	0	0	0	0	0	0	3	0
Bacteria	Proteobacteria	Gammaproteobacteria	Alteromonadales	Pseudoalteromonadaceae	Pseudoalteromonas	Pseudoalteromonas sp. HF66	0	0	0	0	0	0	0	0	0	0	0	0	0	0	0	8	0
Bacteria	Proteobacteria	Gammaproteobacteria	Alteromonadales	Pseudoalteromonadaceae	Pseudoalteromonas	Pseudoalteromonas sp. S1649	0	0	0	0	0	0	0	0	0	0	0	0	0	0	0	1	0
Bacteria	Proteobacteria	Gammaproteobacteria	Alteromonadales	Pseudoalteromonadaceae	Pseudoalteromonas	Pseudoalteromonas sp. S408	0	0	0	0	0	0	0	0	0	0	0	0	0	0	0	1	0
Bacteria	Proteobacteria	Gammaproteobacteria	Enterobacterales	Enterobacteriaceae	Citrobacter	Citrobacter sp. CRE-46	0	0	0	0	0	0	0	0	0	0	0	0	0	0	0	1	0
Bacteria	Proteobacteria	Gammaproteobacteria	Enterobacterales	Enterobacteriaceae	Citrobacter	Citrobacter sp. wls714	0	0	0	0	0	0	0	0	0	0	0	0	0	0	0	1	0
Bacteria	Proteobacteria	Gammaproteobacteria	Enterobacterales	Enterobacteriaceae	Raoultella	Raoultella sp. RIT712	0	0	0	0	0	0	0	0	0	0	0	0	0	0	0	1	0
Bacteria	Proteobacteria	Gammaproteobacteria	Enterobacterales	Erwiniaceae	Pantoea	Pantoea sp. 3_1284	0	0	0	0	0	0	0	0	0	0	0	0	0	0	0	1	0
Bacteria	Proteobacteria	Gammaproteobacteria	Enterobacterales	Erwiniaceae	Pantoea	Pantoea sp. ICBG 985	0	0	0	0	0	0	0	0	0	0	0	0	0	0	0	1	0
Bacteria	Proteobacteria	Gammaproteobacteria	Enterobacterales	Erwiniaceae	Pantoea	Pantoea sp.	0	0	0	0	0	0	0	0	0	0	0	0	0	0	0	3	0
Bacteria	Proteobacteria	Gammaproteobacteria	Orbales	Orbaceae	Gilliamella	Gilliamella sp. Pas-s27	0	0	0	0	0	0	0	0	0	0	0	0	0	0	0	4	0
Bacteria	Proteobacteria	Gammaproteobacteria	Thiotrichales	Francisellaceae	Francisella	Francisella salina	0	0	0	0	0	0	0	0	0	0	0	0	0	0	0	1	0
Bacteria	Proteobacteria	Gammaproteobacteria	Vibrionales	Vibrionaceae	Aliivibrio	Aliivibrio sp. S10_S31	0	0	0	0	0	0	0	0	0	0	0	0	0	0	0	7	0
Bacteria	Spirochaetes	Spirochaetia	Spirochaetales	Spirochaetaceae	Spirochaeta	Spirochaeta aurantia	0	0	0	0	0	0	0	0	0	0	0	0	0	0	0	7	0
Bacteria	Tenericutes	Mollicutes	Acholeplasmatales	Acholeplasmataceae	Candidatus Phytoplasma	Chrysanthemum yellows phytoplasma	0	0	0	0	0	0	0	0	0	0	0	0	0	0	0	1	0
Bacteria	Tenericutes	Mollicutes	Acholeplasmatales	Acholeplasmataceae	Candidatus Phytoplasma	Milkweed yellows phytoplasma	0	0	0	0	0	0	0	0	0	0	0	0	0	0	0	1	0
Eukaryota	Apicomplexa	Aconoidasida	Haemosporida	Leucocytozoidae	Leucocytozoon	Leucocytozoon neotropicalis	0	0	0	0	0	0	0	0	0	0	0	0	0	0	0	7	0
Eukaryota	Apicomplexa	Conoidasida	Eucoccidiorida	Cryptosporidiidae	Cryptosporidium	Cryptosporidium sp. ferret genotype	0	0	0	0	0	0	0	0	0	0	0	0	0	0	0	1	0
Eukaryota	Apicomplexa	Conoidasida	Eucoccidiorida	Eimeriidae	Eimeria	Eimeria magna	0	0	0	0	0	0	0	0	0	0	0	0	0	0	0	5	0
Eukaryota	Ascomycota	Eurotiomycetes	Eurotiales	Aspergillaceae	Penicillium	Penicillium arenicola	0	0	0	0	0	0	0	0	0	0	0	0	0	0	0	2	0
Eukaryota	Ascomycota	Lecanoromycetes	Lecanorales	Parmeliaceae	Bryoria	Bryoria fuscescens	0	0	0	0	0	0	0	0	0	0	0	0	0	0	0	1	0
Eukaryota	Ascomycota	Lecanoromycetes	Peltigerales	Pannariaceae	Pannaria	Pannaria rubiginosa	0	0	0	0	0	0	0	0	0	0	0	0	0	0	0	1	0
Eukaryota	Ascomycota	Saccharomycetes	Saccharomycetales	Saccharomycodaceae	Hanseniaspora	Hanseniaspora sp. 'hatyaiensis'	0	0	0	0	0	0	0	0	0	0	0	0	0	0	0	1	0
Eukaryota	Ascomycota	Sordariomycetes	Glomerellales	Glomerellaceae	Colletotrichum	Colletotrichum cigarro	0	0	0	0	0	0	0	0	0	0	0	0	0	0	0	1	0
Eukaryota	Ascomycota	Sordariomycetes	Hypocreales	Nectriaceae	Fusarium	Fusarium cf. dimerum a DPGS-2011	0	0	0	0	0	0	0	0	0	0	0	0	0	0	0	1	0
Eukaryota	Ascomycota	Sordariomycetes	Xylariales	Sporocadaceae	Discosia	Discosia rubi	0	0	0	0	0	0	0	0	0	0	0	0	0	0	0	1	0
Eukaryota	Bacillariophyta	Bacillariophyceae	Bacillariales	Bacillariaceae	Pseudo-nitzschia	Pseudo-nitzschia granii	0	0	0	0	0	0	0	0	0	0	0	0	0	0	0	1	0
Eukaryota	Bacillariophyta	Bacillariophyceae	Bacillariales	Bacillariaceae	Pseudo-nitzschia	Pseudo-nitzschia seriata	0	0	0	0	0	0	0	0	0	0	0	0	0	0	0	2	0
Eukaryota	Bacillariophyta	Bacillariophyceae	Eunotiales	Eunotiaceae	Eunotia	Eunotia minor	0	0	0	0	0	0	0	0	0	0	0	0	0	0	0	1	0
Eukaryota	Bacillariophyta	Mediophyceae	Biddulphiales	Biddulphiaceae	Biddulphia	Biddulphia tridens	0	0	0	0	0	0	0	0	0	0	0	0	0	0	0	1	0
Eukaryota	Bacillariophyta	NA	NA	NA	NA	uncultured diatom	0	0	0	0	0	0	0	0	0	0	0	0	0	0	0	1	0
Eukaryota	Basidiomycota	Agaricomycetes	Agaricales	Cortinariaceae	Hebeloma	Hebeloma longicaudum	0	0	0	0	0	0	0	0	0	0	0	0	0	0	0	4	0
Eukaryota	Basidiomycota	Agaricomycetes	Agaricales	Strophariaceae	Pholiota	Pholiota microspora	0	0	0	0	0	0	0	0	0	0	0	0	0	0	0	2	0
Eukaryota	Basidiomycota	Agaricomycetes	Agaricales	Tricholomataceae	Tricholoma	Tricholoma flavovirens	0	0	0	0	0	0	0	0	0	0	0	0	0	0	0	1	0
Eukaryota	Basidiomycota	Agaricomycetes	Polyporales	Polyporaceae	Ganoderma	Ganoderma curtisii	0	0	0	0	0	0	0	0	0	0	0	0	0	0	0	1	0
Eukaryota	Basidiomycota	Agaricomycetes	Thelephorales	Thelephoraceae	Sarcodon	Sarcodon imbricatus	0	0	0	0	0	0	0	0	0	0	0	0	0	0	0	1	0
Eukaryota	Basidiomycota	Microbotryomycetes	Microbotryales	Microbotryaceae	Microbotryum	Microbotryum silenes-inflatae	0	0	0	0	0	0	0	0	0	0	0	0	0	0	0	1	0
Eukaryota	Chlorophyta	Trebouxiophyceae	Chlorellales	Chlorellaceae	Auxenochlorella	Auxenochlorella pyrenoidosa	0	0	0	0	0	0	0	0	0	0	0	0	0	0	0	2	0
Eukaryota	Chlorophyta	Ulvophyceae	Bryopsidales	Bryopsidaceae	Bryopsis	Bryopsis plumosa	0	0	0	0	0	0	0	0	0	0	0	0	0	0	0	1	0
Eukaryota	Chlorophyta	Ulvophyceae	Bryopsidales	Halimedaceae	Boodleopsis	Boodleopsis pusilla	0	0	0	0	0	0	0	0	0	0	0	0	0	0	0	1	0
Eukaryota	Discosea	Flabellinia	Dactylopodida	Vexilliferidae	Pseudoparamoeba	Pseudoparamoeba pagei	0	0	0	0	0	0	0	0	0	0	0	0	0	0	0	1	0
Eukaryota	Endomyxa	Ascetosporea	Haplosporida	NA	Bonamia	Bonamia ostreae	0	0	0	0	0	0	0	0	0	0	0	0	0	0	0	1	0
Eukaryota	Euglenozoa	Euglenida	Rhabdomonadales	Astasiidae	Menoidium	Menoidium bibaciliatum	0	0	0	0	0	0	0	0	0	0	0	0	0	0	0	8	0
Eukaryota	Heterolobosea	NA	NA	Creneidae	Creneis	Creneis carolina	0	0	0	0	0	0	0	0	0	0	0	0	0	0	0	1	0
Eukaryota	Mucoromycota	Mucoromycetes	Mucorales	Mucoraceae	Mucor	Mucor mucedo	0	0	0	0	0	0	0	0	0	0	0	0	0	0	0	3	0
Eukaryota	NA	Bigyra	Bicosoecida	NA	Caecitellus	Caecitellus parvulus	0	0	0	0	0	0	0	0	0	0	0	0	0	0	0	7	0
Eukaryota	NA	Bigyra	Bicosoecida	NA	Cafileria	Cafileria marina	0	0	0	0	0	0	0	0	0	0	0	0	0	0	0	1	0
Eukaryota	NA	Choanoflagellata	Acanthoecida	Stephanoecidae	Diaphanoeca	Diaphanoeca grandis	0	0	0	0	0	0	0	0	0	0	0	0	0	0	0	2	0
Eukaryota	NA	Dinophyceae	Dinophysiales	Dinophysiaceae	Dinophysis	Dinophysis acuminata	0	0	0	0	0	0	0	0	0	0	0	0	0	0	0	1	0
Eukaryota	NA	Phaeophyceae	Dictyotales	Dictyotaceae	Dictyota	Dictyota fasciola	0	0	0	0	0	0	0	0	0	0	0	0	0	0	0	1	0
Eukaryota	NA	Synurophyceae	Synurales	Mallomonadaceae	Synura	Synura sphagnicola	0	0	0	0	0	0	0	0	0	0	0	0	0	0	0	1	0
Eukaryota	Oomycota	NA	Peronosporales	Peronosporaceae	Phytophthora	Phytophthora niederhauseri	0	0	0	0	0	0	0	0	0	0	0	0	0	0	0	5	0
Eukaryota	Oomycota	NA	Pythiales	Pythiaceae	Globisporangium	Globisporangium sylvaticum	0	0	0	0	0	0	0	0	0	0	0	0	0	0	0	9	0
Eukaryota	Preaxostyla	NA	Oxymonadida	Pyrsonymphidae	Dinenympha	Dinenympha exilis	0	0	0	0	0	0	0	0	0	0	0	0	0	0	0	5	0
Eukaryota	Rhodophyta	Florideophyceae	Ceramiales	Ceramiaceae	Compsothamnion	Compsothamnion thuyoides	0	0	0	0	0	0	0	0	0	0	0	0	0	0	0	1	0
Eukaryota	Tubulinea	Echinamoebida	NA	Echinamoebidae	Echinamoeba	Echinamoeba exundans	0	0	0	0	0	0	0	0	0	0	0	0	0	0	0	4	0
Eukaryota	Tubulinea	Elardia	Euamoebida	Hartmannellidae	Saccamoeba	Saccamoeba lacustris	0	0	0	0	0	0	0	0	0	0	0	0	0	0	0	5	0
Eukaryota	Zoopagomycota	Entomophthoromycetes	Entomophthorales	Entomophthoraceae	Massospora	Massospora cicadina	0	0	0	0	0	0	0	0	0	0	0	0	0	0	0	1	0
Eukaryota	Zoopagomycota	NA	Ramicandelaberales	Ramicandelaberaceae	Ramicandelaber	Ramicandelaber longisporus	0	0	0	0	0	0	0	0	0	0	0	0	0	0	0	9	0
Viruses	Artverviricota	Revtraviricetes	Ortervirales	Retroviridae	Simiispumavirus	Squirrel monkey simian foamy virus	0	0	0	0	0	0	0	0	0	0	0	0	0	0	0	3	0
Viruses	Cossaviricota	Papovaviricetes	Sepolyvirales	Polyomaviridae	Betapolyomavirus	Mastomys natalensis polyomavirus 2	0	0	0	0	0	0	0	0	0	0	0	0	0	0	0	1	0
Viruses	Cossaviricota	Quintoviricetes	Piccovirales	Parvoviridae	Bocaparvovirus	Carnivore bocaparvovirus 1	0	0	0	0	0	0	0	0	0	0	0	0	0	0	0	1	0
Viruses	Cressdnaviricota	Repensiviricetes	Geplafuvirales	Geminiviridae	Begomovirus	Ageratum enation virus	0	0	0	0	0	0	0	0	0	0	0	0	0	0	0	1	0
Viruses	Cressdnaviricota	Repensiviricetes	Geplafuvirales	Geminiviridae	Begomovirus	Siegesbeckia yellow vein Guangxi virus	0	0	0	0	0	0	0	0	0	0	0	0	0	0	0	10	0
Viruses	Cressdnaviricota	Repensiviricetes	Geplafuvirales	Geminiviridae	Begomovirus	Tomato leaf curl New Delhi virus	0	0	0	0	0	0	0	0	0	0	0	0	0	0	0	1	0
Viruses	Cressdnaviricota	Repensiviricetes	Geplafuvirales	Genomoviridae	NA	Chicken genomovirus mg8_401	0	0	0	0	0	0	0	0	0	0	0	0	0	0	0	1	0
Viruses	Duplornaviricota	Chrymotiviricetes	Ghabrivirales	Chrysoviridae	Chrysovirus	Magnaporthe oryzae chrysovirus 1	0	0	0	0	0	0	0	0	0	0	0	0	0	0	0	1	0
Viruses	Duplornaviricota	Chrymotiviricetes	Ghabrivirales	Totiviridae	NA	Uromyces totivirus B	0	0	0	0	0	0	0	0	0	0	0	0	0	0	0	2	0
Viruses	Kitrinoviricota	Alsuviricetes	Martellivirales	Closteroviridae	Closterovirus	Carrot yellow leaf virus	0	0	0	0	0	0	0	0	0	0	0	0	0	0	0	12	0
Viruses	Kitrinoviricota	Alsuviricetes	Martellivirales	Endornaviridae	NA	Ceratobasidium endornavirus-like	0	0	0	0	0	0	0	0	0	0	0	0	0	0	0	1	0
Viruses	Kitrinoviricota	Alsuviricetes	Martellivirales	Togaviridae	Alphavirus	Getah virus	0	0	0	0	0	0	0	0	0	0	0	0	0	0	0	1	0
Viruses	Kitrinoviricota	Alsuviricetes	Tymovirales	Betaflexiviridae	Vitivirus	Grapevine virus B	0	0	0	0	0	0	0	0	0	0	0	0	0	0	0	1	0
Viruses	Kitrinoviricota	Alsuviricetes	Tymovirales	Tymoviridae	Marafivirus	Grapevine Syrah virus 1	0	0	0	0	0	0	0	0	0	0	0	0	0	0	0	4	0
Viruses	Kitrinoviricota	Alsuviricetes	Tymovirales	Tymoviridae	Tymovirus	Erysimum latent virus	0	0	0	0	0	0	0	0	0	0	0	0	0	0	0	1	0
Viruses	Kitrinoviricota	Flasuviricetes	Amarillovirales	Flaviviridae	Pestivirus	Trinbago virus	0	0	0	0	0	0	0	0	0	0	0	0	0	0	0	1	0
Viruses	Kitrinoviricota	Tolucaviricetes	Tolivirales	Luteoviridae	Polerovirus	Cereal yellow dwarf virus RPV	0	0	0	0	0	0	0	0	0	0	0	0	0	0	0	1	0
Viruses	Kitrinoviricota	Tolucaviricetes	Tolivirales	Tombusviridae	NA	Soybean thrips tombus-like virus 2	0	0	0	0	0	0	0	0	0	0	0	0	0	0	0	1	0
Viruses	Kitrinoviricota	Tolucaviricetes	Tolivirales	Tombusviridae	NA	TGP Carmovirus 3	0	0	0	0	0	0	0	0	0	0	0	0	0	0	0	1	0
Viruses	NA	NA	NA	Anelloviridae	Alphatorquevirus	Torque teno virus 14	0	0	0	0	0	0	0	0	0	0	0	0	0	0	0	1	0
Viruses	NA	NA	NA	Baculoviridae	Alphabaculovirus	Catopsilia pomona nucleopolyhedrovirus	0	0	0	0	0	0	0	0	0	0	0	0	0	0	0	1	0
Viruses	NA	NA	NA	NA	NA	Beihai noda-like virus 9	0	0	0	0	0	0	0	0	0	0	0	0	0	0	0	2	0
Viruses	NA	NA	NA	NA	NA	environmental Halophage eHP-7	0	0	0	0	0	0	0	0	0	0	0	0	0	0	0	8	0
Viruses	NA	NA	NA	NA	NA	Manly virus	0	0	0	0	0	0	0	0	0	0	0	0	0	0	0	1	0
Viruses	NA	NA	NA	NA	NA	Penicillium adametzioides negative-stranded RNA virus 1	0	0	0	0	0	0	0	0	0	0	0	0	0	0	0	12	0
Viruses	NA	NA	NA	NA	NA	Primus virus	0	0	0	0	0	0	0	0	0	0	0	0	0	0	0	2	0
Viruses	NA	NA	NA	NA	NA	Streptococcus phage 23TH	0	0	0	0	0	0	0	0	0	0	0	0	0	0	0	4	0
Viruses	NA	NA	NA	Nimaviridae	NA	NA	0	0	0	0	0	0	0	0	0	0	0	0	0	0	0	1	0
Viruses	Negarnaviricota	Ellioviricetes	Bunyavirales	Nairoviridae	Orthonairovirus	Camel Crimean-Congo hemorrhagic fever orthonairovirus	0	0	0	0	0	0	0	0	0	0	0	0	0	0	0	2	0
Viruses	Negarnaviricota	Ellioviricetes	Bunyavirales	Phenuiviridae	Wubeivirus	Fly wubeivirus	0	0	0	0	0	0	0	0	0	0	0	0	0	0	0	1	0
Viruses	Negarnaviricota	Insthoviricetes	Articulavirales	Amnoonviridae	Tilapinevirus	Tilapia tilapinevirus	0	0	0	0	0	0	0	0	0	0	0	0	0	0	0	1	0
Viruses	Negarnaviricota	Monjiviricetes	Mononegavirales	Bornaviridae	Orthobornavirus	Parrot bornavirus 8	0	0	0	0	0	0	0	0	0	0	0	0	0	0	0	5	0
Viruses	Negarnaviricota	NA	NA	NA	NA	Botrytis cinerea negative stranded RNA virus 9	0	0	0	0	0	0	0	0	0	0	0	0	0	0	0	4	0
Viruses	Nucleocytoviricota	Megaviricetes	Pimascovirales	Iridoviridae	Chloriridovirus	Invertebrate iridescent virus 30	0	0	0	0	0	0	0	0	0	0	0	0	0	0	0	4	0
Viruses	Nucleocytoviricota	Pokkesviricetes	Chitovirales	Poxviridae	Avipoxvirus	Pigeonpox virus	0	0	0	0	0	0	0	0	0	0	0	0	0	0	0	1	0
Viruses	Peploviricota	Herviviricetes	Herpesvirales	Herpesviridae	Cytomegalovirus	Cynomolgus cytomegalovirus	0	0	0	0	0	0	0	0	0	0	0	0	0	0	0	1	0
Viruses	Peploviricota	Herviviricetes	Herpesvirales	Herpesviridae	Macavirus	Suid gammaherpesvirus 4	0	0	0	0	0	0	0	0	0	0	0	0	0	0	0	9	0
Viruses	Peploviricota	Herviviricetes	Herpesvirales	Herpesviridae	NA	Macropodid alphaherpesvirus 4	0	0	0	0	0	0	0	0	0	0	0	0	0	0	0	12	0
Viruses	Peploviricota	Herviviricetes	Herpesvirales	Herpesviridae	NA	Tupaia belangeri gammaherpesvirus 1	0	0	0	0	0	0	0	0	0	0	0	0	0	0	0	17	0
Viruses	Pisuviricota	Pisoniviricetes	Nidovirales	Coronaviridae	Alphacoronavirus	Alphacoronavirus sp.	0	0	0	0	0	0	0	0	0	0	0	0	0	0	0	1	0
Viruses	Pisuviricota	Pisoniviricetes	Nidovirales	Coronaviridae	NA	Shrew coronavirus	0	0	0	0	0	0	0	0	0	0	0	0	0	0	0	1	0
Viruses	Pisuviricota	Pisoniviricetes	Picornavirales	Iflaviridae	Iflavirus	Iflavirus sp.	0	0	0	0	0	0	0	0	0	0	0	0	0	0	0	10	0
Viruses	Pisuviricota	Pisoniviricetes	Picornavirales	Secoviridae	Comovirus	Turnip ringspot virus	0	0	0	0	0	0	0	0	0	0	0	0	0	0	0	2	0
Viruses	Pisuviricota	Stelpaviricetes	Stellavirales	Astroviridae	NA	Hainan marbled pigmy frog astrovirus 1	0	0	0	0	0	0	0	0	0	0	0	0	0	0	0	1	0
Viruses	Preplasmiviricota	Tectiliviricetes	Rowavirales	Adenoviridae	Atadenovirus	Bearded dragon adenovirus 1	0	0	0	0	0	0	0	0	0	0	0	0	0	0	0	1	0
Viruses	Preplasmiviricota	Tectiliviricetes	Rowavirales	Adenoviridae	NA	Red-eared slider adenovirus 1	0	0	0	0	0	0	0	0	0	0	0	0	0	0	0	2	0
Viruses	Uroviricota	Caudoviricetes	Caudovirales	Autographiviridae	Phimunavirus	Pectobacterium virus Gaspode	0	0	0	0	0	0	0	0	0	0	0	0	0	0	0	12	0
Viruses	Uroviricota	Caudoviricetes	Caudovirales	Myoviridae	Asteriusvirus	Escherichia phage CMSTMSU	0	0	0	0	0	0	0	0	0	0	0	0	0	0	0	11	0
Viruses	Uroviricota	Caudoviricetes	Caudovirales	Myoviridae	NA	Edwardsiella phage vB_EtaM_ET-ABTNL-9	0	0	0	0	0	0	0	0	0	0	0	0	0	0	0	4	0
Viruses	Uroviricota	Caudoviricetes	Caudovirales	Myoviridae	NA	Pantoea phage vB_PagM_AAM22	0	0	0	0	0	0	0	0	0	0	0	0	0	0	0	5	0
Viruses	Uroviricota	Caudoviricetes	Caudovirales	Myoviridae	NA	Rhizobium phage RR1-A	0	0	0	0	0	0	0	0	0	0	0	0	0	0	0	1	0
Viruses	Uroviricota	Caudoviricetes	Caudovirales	Myoviridae	NA	Synechococcus phage S-H34	0	0	0	0	0	0	0	0	0	0	0	0	0	0	0	20	0
Viruses	Uroviricota	Caudoviricetes	Caudovirales	Myoviridae	NA	Vibrio phage 1.187.O._10N.286.49.F1	0	0	0	0	0	0	0	0	0	0	0	0	0	0	0	18	0
Viruses	Uroviricota	Caudoviricetes	Caudovirales	Myoviridae	Pbunavirus	Burkholderia virus BcepF1	0	0	0	0	0	0	0	0	0	0	0	0	0	0	0	1	0
Viruses	Uroviricota	Caudoviricetes	Caudovirales	Myoviridae	Vequintavirus	Escherichia virus V18	0	0	0	0	0	0	0	0	0	0	0	0	0	0	0	1	0
Viruses	Uroviricota	Caudoviricetes	Caudovirales	Myoviridae	Winklervirus	Serratia phage X20	0	0	0	0	0	0	0	0	0	0	0	0	0	0	0	3	0
Viruses	Uroviricota	Caudoviricetes	Caudovirales	NA	NA	Bacteroides phage DAC16	0	0	0	0	0	0	0	0	0	0	0	0	0	0	0	20	0
Viruses	Uroviricota	Caudoviricetes	Caudovirales	NA	NA	uncultured Mediterranean phage uvDeep-CGR2-AD12-C183	0	0	0	0	0	0	0	0	0	0	0	0	0	0	0	1	0
Viruses	Uroviricota	Caudoviricetes	Caudovirales	Podoviridae	Baltimorevirus	Silicibacter phage DSS3phi2	0	0	0	0	0	0	0	0	0	0	0	0	0	0	0	3	0
Viruses	Uroviricota	Caudoviricetes	Caudovirales	Podoviridae	Ithacavirus	Salmonella virus FSL SP-058	0	0	0	0	0	0	0	0	0	0	0	0	0	0	0	15	0
Viruses	Uroviricota	Caudoviricetes	Caudovirales	Podoviridae	Lessievirus	Burkholderia virus Bcepil02	0	0	0	0	0	0	0	0	0	0	0	0	0	0	0	1	0
Viruses	Uroviricota	Caudoviricetes	Caudovirales	Podoviridae	NA	EBPR podovirus 2	0	0	0	0	0	0	0	0	0	0	0	0	0	0	0	14	0
Viruses	Uroviricota	Caudoviricetes	Caudovirales	Podoviridae	NA	Erwinia phage Pavtok	0	0	0	0	0	0	0	0	0	0	0	0	0	0	0	1	0
Viruses	Uroviricota	Caudoviricetes	Caudovirales	Podoviridae	NA	Podoviridae sp. ctdc61	0	0	0	0	0	0	0	0	0	0	0	0	0	0	0	5	0
Viruses	Uroviricota	Caudoviricetes	Caudovirales	Podoviridae	NA	Serratia phage Parlo	0	0	0	0	0	0	0	0	0	0	0	0	0	0	0	1	0
Viruses	Uroviricota	Caudoviricetes	Caudovirales	Podoviridae	NA	uncultured Mediterranean phage uvDeep-CGR2-KM21-C368	0	0	0	0	0	0	0	0	0	0	0	0	0	0	0	1	0
Viruses	Uroviricota	Caudoviricetes	Caudovirales	Siphoviridae	Ahduovirus	Burkholderia virus AH2	0	0	0	0	0	0	0	0	0	0	0	0	0	0	0	5	0
Viruses	Uroviricota	Caudoviricetes	Caudovirales	Siphoviridae	Bongovirus	NA	0	0	0	0	0	0	0	0	0	0	0	0	0	0	0	1	0
Viruses	Uroviricota	Caudoviricetes	Caudovirales	Siphoviridae	Brussowvirus	Streptococcus phage P7953	0	0	0	0	0	0	0	0	0	0	0	0	0	0	0	3	0
Viruses	Uroviricota	Caudoviricetes	Caudovirales	Siphoviridae	Brussowvirus	Streptococcus phage P9852	0	0	0	0	0	0	0	0	0	0	0	0	0	0	0	5	0
Viruses	Uroviricota	Caudoviricetes	Caudovirales	Siphoviridae	Feofaniavirus	Erwinia virus Eho59	0	0	0	0	0	0	0	0	0	0	0	0	0	0	0	1	0
Viruses	Uroviricota	Caudoviricetes	Caudovirales	Siphoviridae	NA	Bordetella phage vB_BbrS_PHB09	0	0	0	0	0	0	0	0	0	0	0	0	0	0	0	1	0
Viruses	Uroviricota	Caudoviricetes	Caudovirales	Siphoviridae	NA	Flavobacterium sp. phage 1/32	0	0	0	0	0	0	0	0	0	0	0	0	0	0	0	10	0
Viruses	Uroviricota	Caudoviricetes	Caudovirales	Siphoviridae	NA	Gordonia phage Ennea	0	0	0	0	0	0	0	0	0	0	0	0	0	0	0	1	0
Viruses	Uroviricota	Caudoviricetes	Caudovirales	Siphoviridae	NA	Klebsiella phage Seifer	0	0	0	0	0	0	0	0	0	0	0	0	0	0	0	4	0
Viruses	Uroviricota	Caudoviricetes	Caudovirales	Siphoviridae	NA	Lactococcus phage Tuc2009	0	0	0	0	0	0	0	0	0	0	0	0	0	0	0	1	0
Viruses	Uroviricota	Caudoviricetes	Caudovirales	Siphoviridae	NA	Mycobacterium phage DS6A	0	0	0	0	0	0	0	0	0	0	0	0	0	0	0	1	0
Viruses	Uroviricota	Caudoviricetes	Caudovirales	Siphoviridae	NA	Paracoccus phage vB_PbeS_Pben1	0	0	0	0	0	0	0	0	0	0	0	0	0	0	0	10	0
Viruses	Uroviricota	Caudoviricetes	Caudovirales	Siphoviridae	NA	Plesiomonas phage phiP4-7	0	0	0	0	0	0	0	0	0	0	0	0	0	0	0	10	0
Viruses	Uroviricota	Caudoviricetes	Caudovirales	Siphoviridae	NA	Ruegeria phage Tedan	0	0	0	0	0	0	0	0	0	0	0	0	0	0	0	1	0
Viruses	Uroviricota	Caudoviricetes	Caudovirales	Siphoviridae	NA	Streptococcus phage Javan350	0	0	0	0	0	0	0	0	0	0	0	0	0	0	0	1	0
Viruses	Uroviricota	Caudoviricetes	Caudovirales	Siphoviridae	NA	Streptomyces phage ZL12	0	0	0	0	0	0	0	0	0	0	0	0	0	0	0	2	0
Viruses	Uroviricota	Caudoviricetes	Caudovirales	Siphoviridae	NA	Vibrio phage 1.060.A._10N.261.48.B5	0	0	0	0	0	0	0	0	0	0	0	0	0	0	0	1	0
Viruses	Uroviricota	Caudoviricetes	Caudovirales	Siphoviridae	NA	Vibrio phage vB_VhaS-tm	0	0	0	0	0	0	0	0	0	0	0	0	0	0	0	1	0
Viruses	Uroviricota	Caudoviricetes	Caudovirales	Siphoviridae	Pahexavirus	Propionibacterium phage PAC6	0	0	0	0	0	0	0	0	0	0	0	0	0	0	0	2	0
Viruses	Uroviricota	Caudoviricetes	Caudovirales	Siphoviridae	Pipefishvirus	Mycobacterium phage Yahalom	0	0	0	0	0	0	0	0	0	0	0	0	0	0	0	4	0
Viruses	Uroviricota	Caudoviricetes	Caudovirales	Siphoviridae	Plotvirus	Mycobacterium virus Plot	0	0	0	0	0	0	0	0	0	0	0	0	0	0	0	7	0
Viruses	Uroviricota	Caudoviricetes	Caudovirales	Siphoviridae	Poindextervirus	Caulobacter virus CcrBL10	0	0	0	0	0	0	0	0	0	0	0	0	0	0	0	12	0
Viruses	Uroviricota	Caudoviricetes	Caudovirales	Siphoviridae	Samistivirus	Streptomyces phage EGole	0	0	0	0	0	0	0	0	0	0	0	0	0	0	0	1	0
Viruses	Uroviricota	Caudoviricetes	Caudovirales	Siphoviridae	Sasvirus	Corynebacterium virus BFK20	0	0	0	0	0	0	0	0	0	0	0	0	0	0	0	4	0
Viruses	Uroviricota	Caudoviricetes	Caudovirales	Siphoviridae	Smoothievirus	NA	0	0	0	0	0	0	0	0	0	0	0	0	0	0	0	4	0
Viruses	Uroviricota	Caudoviricetes	Caudovirales	Siphoviridae	Steinhofvirus	Achromobacter phage AMA1	0	0	0	0	0	0	0	0	0	0	0	0	0	0	0	1	0
Viruses	Uroviricota	Caudoviricetes	Caudovirales	Siphoviridae	Yangvirus	NA	0	0	0	0	0	0	0	0	0	0	0	0	0	0	0	1	0
Archaea	Candidatus Bathyarchaeota	NA	NA	NA	NA	uncultured miscellaneous Crenarchaeota group	0	0	0	0	0	0	0	0	0	0	0	0	0	0	0	0	8
Archaea	Candidatus Micrarchaeota	NA	NA	NA	Candidatus Micrarchaeum	Candidatus Micrarchaeum sp. AZ1	0	0	0	0	0	0	0	0	0	0	0	0	0	0	0	0	9
Archaea	Candidatus Micrarchaeota	NA	NA	NA	NA	Candidatus Micrarchaeota archaeon CG1_02_55_41	0	0	0	0	0	0	0	0	0	0	0	0	0	0	0	0	1
Archaea	Crenarchaeota	NA	NA	NA	NA	Crenarchaeota archaeon 13_1_20CM_2_53_14	0	0	0	0	0	0	0	0	0	0	0	0	0	0	0	0	28
Archaea	Euryarchaeota	Methanobacteria	Methanobacteriales	Methanobacteriaceae	Methanobacterium	Methanobacterium sp. 42_16	0	0	0	0	0	0	0	0	0	0	0	0	0	0	0	0	7
Archaea	Euryarchaeota	Methanomicrobia	Methanosarcinales	Methanosarcinaceae	Methanohalophilus	Methanohalophilus euhalobius	0	0	0	0	0	0	0	0	0	0	0	0	0	0	0	0	9
Archaea	Euryarchaeota	Methanomicrobia	Methanosarcinales	Methanosarcinaceae	Methanosarcina	Methanosarcina sp. WH1	0	0	0	0	0	0	0	0	0	0	0	0	0	0	0	0	1
Archaea	Thaumarchaeota	NA	NA	NA	NA	uncultured marine thaumarchaeote KM3_15_E05	0	0	0	0	0	0	0	0	0	0	0	0	0	0	0	0	1
Archaea	Thaumarchaeota	NA	NA	NA	NA	uncultured marine thaumarchaeote KM3_15_F02	0	0	0	0	0	0	0	0	0	0	0	0	0	0	0	0	7
Archaea	Thaumarchaeota	NA	NA	NA	NA	uncultured marine thaumarchaeote KM3_79_C04	0	0	0	0	0	0	0	0	0	0	0	0	0	0	0	0	14
Bacteria	Acidobacteria	Acidobacteriia	Bryobacterales	NA	NA	Bryobacterales bacterium KBS 96	0	0	0	0	0	0	0	0	0	0	0	0	0	0	0	0	2
Bacteria	Actinobacteria	Actinomycetia	Bifidobacteriales	Bifidobacteriaceae	NA	Bifidobacteriaceae bacterium NR020	0	0	0	0	0	0	0	0	0	0	0	0	0	0	0	0	1
Bacteria	Actinobacteria	Actinomycetia	Micrococcales	Kytococcaceae	Kytococcus	uncultured Kytococcus sp.	0	0	0	0	0	0	0	0	0	0	0	0	0	0	0	0	1
Bacteria	Actinobacteria	Actinomycetia	Streptosporangiales	Nocardiopsaceae	Nocardiopsis	Nocardiopsis sp. 25L-1-1c	0	0	0	0	0	0	0	0	0	0	0	0	0	0	0	0	17
Bacteria	Actinobacteria	Actinomycetia	Streptosporangiales	Thermomonosporaceae	Actinomadura	Actinomadura sp. SoC090715LN-10	0	0	0	0	0	0	0	0	0	0	0	0	0	0	0	0	1
Bacteria	Actinobacteria	Coriobacteriia	Coriobacteriales	Coriobacteriaceae	Collinsella	Collinsella sp. AF04-24	0	0	0	0	0	0	0	0	0	0	0	0	0	0	0	0	1
Bacteria	Bacteroidetes	Cytophagia	Cytophagales	Flammeovirgaceae	Flammeovirga	uncultured Flammeovirga sp.	0	0	0	0	0	0	0	0	0	0	0	0	0	0	0	0	1
Bacteria	Bacteroidetes	Flavobacteriia	Flavobacteriales	Blattabacteriaceae	Blattabacterium	Blattabacterium sp. (Eurycotis decipiens)	0	0	0	0	0	0	0	0	0	0	0	0	0	0	0	0	14
Bacteria	Bacteroidetes	Flavobacteriia	Flavobacteriales	Flavobacteriaceae	Maribacter	Maribacter sp. 6B07	0	0	0	0	0	0	0	0	0	0	0	0	0	0	0	0	17
Bacteria	Bacteroidetes	Sphingobacteriia	NA	NA	NA	Sphingobacteriia bacterium 32-37-4	0	0	0	0	0	0	0	0	0	0	0	0	0	0	0	0	24
Bacteria	Candidatus Adlerbacteria	NA	NA	NA	NA	Candidatus Adlerbacteria bacterium RIFOXYB1_FULL_48_10	0	0	0	0	0	0	0	0	0	0	0	0	0	0	0	0	28
Bacteria	Candidatus Amesbacteria	NA	NA	NA	NA	Candidatus Amesbacteria bacterium GW2011_GWA1_46_35	0	0	0	0	0	0	0	0	0	0	0	0	0	0	0	0	23
Bacteria	Candidatus Atribacteria	NA	NA	NA	NA	Candidatus Atribacteria bacterium RBG_16_35_8	0	0	0	0	0	0	0	0	0	0	0	0	0	0	0	0	30
Bacteria	Candidatus Azambacteria	NA	NA	NA	NA	Candidatus Azambacteria bacterium GW2011_GWA2_42_9	0	0	0	0	0	0	0	0	0	0	0	0	0	0	0	0	39
Bacteria	Candidatus Azambacteria	NA	NA	NA	NA	Candidatus Azambacteria bacterium GW2011_GWC2_43_27	0	0	0	0	0	0	0	0	0	0	0	0	0	0	0	0	3
Bacteria	Candidatus Azambacteria	NA	NA	NA	NA	Candidatus Azambacteria bacterium GW2011_GWE2_46_45	0	0	0	0	0	0	0	0	0	0	0	0	0	0	0	0	12
Bacteria	Candidatus Azambacteria	NA	NA	NA	NA	Candidatus Azambacteria bacterium RIFCSPHIGHO2_01_FULL_51_74	0	0	0	0	0	0	0	0	0	0	0	0	0	0	0	0	8
Bacteria	Candidatus Brennerbacteria	NA	NA	NA	NA	Candidatus Brennerbacteria bacterium RIFOXYD1_FULL_41_16	0	0	0	0	0	0	0	0	0	0	0	0	0	0	0	0	38
Bacteria	Candidatus Collierbacteria	NA	NA	NA	NA	Candidatus Collierbacteria bacterium GW2011_GWE2_42_48	0	0	0	0	0	0	0	0	0	0	0	0	0	0	0	0	24
Bacteria	Candidatus Colwellbacteria	NA	NA	NA	NA	Candidatus Colwellbacteria bacterium RIFCSPHIGHO2_02_FULL_45_17	0	0	0	0	0	0	0	0	0	0	0	0	0	0	0	0	6
Bacteria	Candidatus Colwellbacteria	NA	NA	NA	NA	Candidatus Colwellbacteria bacterium RIFCSPHIGHO2_12_FULL_43_12	0	0	0	0	0	0	0	0	0	0	0	0	0	0	0	0	37
Bacteria	Candidatus Daviesbacteria	NA	NA	NA	NA	Candidatus Daviesbacteria bacterium GW2011_GWA2_40_9	0	0	0	0	0	0	0	0	0	0	0	0	0	0	0	0	23
Bacteria	Candidatus Daviesbacteria	NA	NA	NA	NA	Candidatus Daviesbacteria bacterium GW2011_GWF2_38_7	0	0	0	0	0	0	0	0	0	0	0	0	0	0	0	0	41
Bacteria	Candidatus Daviesbacteria	NA	NA	NA	NA	Candidatus Daviesbacteria bacterium RIFCSPHIGHO2_01_FULL_38_8b	0	0	0	0	0	0	0	0	0	0	0	0	0	0	0	0	13
Bacteria	Candidatus Daviesbacteria	NA	NA	NA	NA	Candidatus Daviesbacteria bacterium RIFCSPHIGHO2_12_FULL_47_45	0	0	0	0	0	0	0	0	0	0	0	0	0	0	0	0	27
Bacteria	Candidatus Daviesbacteria	NA	NA	NA	NA	Candidatus Daviesbacteria bacterium RIFCSPLOWO2_02_FULL_40_8	0	0	0	0	0	0	0	0	0	0	0	0	0	0	0	0	17
Bacteria	Candidatus Desantisbacteria	NA	NA	NA	NA	Candidatus Desantisbacteria bacterium CG2_30_40_21	0	0	0	0	0	0	0	0	0	0	0	0	0	0	0	0	45
Bacteria	Candidatus Falkowbacteria	NA	NA	NA	NA	Candidatus Falkowbacteria bacterium RIFOXYD2_FULL_35_9	0	0	0	0	0	0	0	0	0	0	0	0	0	0	0	0	9
Bacteria	Candidatus Giovannonibacteria	NA	NA	NA	NA	Candidatus Giovannonibacteria bacterium GW2011_GWA1_44_29	0	0	0	0	0	0	0	0	0	0	0	0	0	0	0	0	30
Bacteria	Candidatus Giovannonibacteria	NA	NA	NA	NA	Candidatus Giovannonibacteria bacterium RIFCSPHIGHO2_02_FULL_43_32	0	0	0	0	0	0	0	0	0	0	0	0	0	0	0	0	12
Bacteria	Candidatus Gottesmanbacteria	NA	NA	NA	NA	Candidatus Gottesmanbacteria bacterium CG1_02_37_22	0	0	0	0	0	0	0	0	0	0	0	0	0	0	0	0	43
Bacteria	Candidatus Gottesmanbacteria	NA	NA	NA	NA	Candidatus Gottesmanbacteria bacterium GW2011_GWA2_44_17	0	0	0	0	0	0	0	0	0	0	0	0	0	0	0	0	1
Bacteria	Candidatus Jacksonbacteria	NA	NA	NA	NA	Candidatus Jacksonbacteria bacterium RIFCSPLOWO2_02_FULL_44_20	0	0	0	0	0	0	0	0	0	0	0	0	0	0	0	0	11
Bacteria	Candidatus Kaiserbacteria	NA	NA	NA	NA	Candidatus Kaiserbacteria bacterium CG08_land_8_20_14_0_20_50_21	0	0	0	0	0	0	0	0	0	0	0	0	0	0	0	0	4
Bacteria	Candidatus Kaiserbacteria	NA	NA	NA	NA	Candidatus Kaiserbacteria bacterium RIFCSPHIGHO2_01_FULL_58_22	0	0	0	0	0	0	0	0	0	0	0	0	0	0	0	0	13
Bacteria	Candidatus Kaiserbacteria	NA	NA	NA	NA	Candidatus Kaiserbacteria bacterium RIFCSPLOWO2_12_FULL_50_10	0	0	0	0	0	0	0	0	0	0	0	0	0	0	0	0	48
Bacteria	Candidatus Kerfeldbacteria	NA	NA	NA	NA	Candidatus Kerfeldbacteria bacterium CG_4_9_14_3_um_filter_45_8	0	0	0	0	0	0	0	0	0	0	0	0	0	0	0	0	19
Bacteria	Candidatus Kuenenbacteria	NA	NA	NA	NA	Candidatus Kuenenbacteria bacterium CG1_02_38_13	0	0	0	0	0	0	0	0	0	0	0	0	0	0	0	0	23
Bacteria	Candidatus Levybacteria	NA	NA	NA	NA	Candidatus Levybacteria bacterium CG_4_10_14_0_2_um_filter_36_16	0	0	0	0	0	0	0	0	0	0	0	0	0	0	0	0	26
Bacteria	Candidatus Levybacteria	NA	NA	NA	NA	Candidatus Levybacteria bacterium GW2011_GWB1_36_18	0	0	0	0	0	0	0	0	0	0	0	0	0	0	0	0	8
Bacteria	Candidatus Levybacteria	NA	NA	NA	NA	Candidatus Levybacteria bacterium GW2011_GWB1_41_21	0	0	0	0	0	0	0	0	0	0	0	0	0	0	0	0	19
Bacteria	Candidatus Levybacteria	NA	NA	NA	NA	Candidatus Levybacteria bacterium RIFCSPLOWO2_02_FULL_39_26	0	0	0	0	0	0	0	0	0	0	0	0	0	0	0	0	1
Bacteria	Candidatus Moranbacteria	NA	NA	NA	NA	Candidatus Moranbacteria bacterium GW2011_GWE1_36_7	0	0	0	0	0	0	0	0	0	0	0	0	0	0	0	0	33
Bacteria	Candidatus Nealsonbacteria	NA	NA	NA	NA	Candidatus Nealsonbacteria bacterium CG10_big_fil_rev_8_21_14_0_10_36_228	0	0	0	0	0	0	0	0	0	0	0	0	0	0	0	0	14
Bacteria	Candidatus Nealsonbacteria	NA	NA	NA	NA	Candidatus Nealsonbacteria bacterium CG11_big_fil_rev_8_21_14_0_20_35_11	0	0	0	0	0	0	0	0	0	0	0	0	0	0	0	0	16
Bacteria	Candidatus Nealsonbacteria	NA	NA	NA	NA	Candidatus Nealsonbacteria bacterium CG23_combo_of_CG06-09_8_20_14_all_39_17	0	0	0	0	0	0	0	0	0	0	0	0	0	0	0	0	16
Bacteria	Candidatus Nomurabacteria	NA	NA	NA	NA	Candidatus Nomurabacteria bacterium GW2011_GWA2_41_25	0	0	0	0	0	0	0	0	0	0	0	0	0	0	0	0	22
Bacteria	Candidatus Nomurabacteria	NA	NA	NA	NA	Candidatus Nomurabacteria bacterium GW2011_GWB1_43_19	0	0	0	0	0	0	0	0	0	0	0	0	0	0	0	0	7
Bacteria	Candidatus Nomurabacteria	NA	NA	NA	NA	Candidatus Nomurabacteria bacterium RIFCSPHIGHO2_12_FULL_42_19	0	0	0	0	0	0	0	0	0	0	0	0	0	0	0	0	19
Bacteria	Candidatus Nomurabacteria	NA	NA	NA	NA	Candidatus Nomurabacteria bacterium RIFCSPLOWO2_02_FULL_42_24	0	0	0	0	0	0	0	0	0	0	0	0	0	0	0	0	12
Bacteria	Candidatus Nomurabacteria	NA	NA	NA	NA	Candidatus Nomurabacteria bacterium RIFOXYB1_FULL_39_16	0	0	0	0	0	0	0	0	0	0	0	0	0	0	0	0	15
Bacteria	Candidatus Nomurabacteria	NA	NA	NA	NA	Candidatus Nomurabacteria bacterium RIFOXYC2_FULL_36_19	0	0	0	0	0	0	0	0	0	0	0	0	0	0	0	0	15
Bacteria	Candidatus Omnitrophica	NA	NA	NA	NA	Omnitrophica WOR_2 bacterium RIFOXYA12_FULL_38_10	0	0	0	0	0	0	0	0	0	0	0	0	0	0	0	0	2
Bacteria	Candidatus Pacebacteria	NA	NA	NA	NA	Candidatus Pacebacteria bacterium CG10_big_fil_rev_8_21_14_0_10_44_11	0	0	0	0	0	0	0	0	0	0	0	0	0	0	0	0	27
Bacteria	Candidatus Peregrinibacteria	Candidatus Peribacteria	NA	NA	NA	Candidatus Peribacteria bacterium RIFCSPHIGHO2_02_FULL_52_16	0	0	0	0	0	0	0	0	0	0	0	0	0	0	0	0	9
Bacteria	Candidatus Peregrinibacteria	NA	NA	NA	NA	Candidatus Peregrinibacteria bacterium GW2011_GWA2_54_9	0	0	0	0	0	0	0	0	0	0	0	0	0	0	0	0	1
Bacteria	Candidatus Portnoybacteria	NA	NA	NA	NA	Candidatus Portnoybacteria bacterium RIFCSPLOWO2_02_FULL_40_15	0	0	0	0	0	0	0	0	0	0	0	0	0	0	0	0	5
Bacteria	Candidatus Roizmanbacteria	NA	NA	NA	NA	Candidatus Roizmanbacteria bacterium CG10_big_fil_rev_8_21_14_0_10_39_12	0	0	0	0	0	0	0	0	0	0	0	0	0	0	0	0	19
Bacteria	Candidatus Roizmanbacteria	NA	NA	NA	NA	Candidatus Roizmanbacteria bacterium RIFOXYA1_FULL_41_12	0	0	0	0	0	0	0	0	0	0	0	0	0	0	0	0	10
Bacteria	Candidatus Ryanbacteria	NA	NA	NA	NA	Candidatus Ryanbacteria bacterium RIFCSPHIGHO2_01_FULL_48_80	0	0	0	0	0	0	0	0	0	0	0	0	0	0	0	0	18
Bacteria	Candidatus Schekmanbacteria	NA	NA	NA	NA	Candidatus Schekmanbacteria bacterium GWA2_38_9	0	0	0	0	0	0	0	0	0	0	0	0	0	0	0	0	17
Bacteria	Candidatus Shapirobacteria	NA	NA	NA	NA	Candidatus Shapirobacteria bacterium CG09_land_8_20_14_0_10_49_15	0	0	0	0	0	0	0	0	0	0	0	0	0	0	0	0	16
Bacteria	Candidatus Sungbacteria	NA	NA	NA	NA	Candidatus Sungbacteria bacterium RIFCSPHIGHO2_02_FULL_46_12	0	0	0	0	0	0	0	0	0	0	0	0	0	0	0	0	16
Bacteria	Candidatus Taylorbacteria	NA	NA	NA	NA	Candidatus Taylorbacteria bacterium RIFCSPLOWO2_01_FULL_43_44	0	0	0	0	0	0	0	0	0	0	0	0	0	0	0	0	3
Bacteria	Candidatus Taylorbacteria	NA	NA	NA	NA	Candidatus Taylorbacteria bacterium RIFCSPLOWO2_01_FULL_43_83	0	0	0	0	0	0	0	0	0	0	0	0	0	0	0	0	18
Bacteria	Candidatus Taylorbacteria	NA	NA	NA	NA	Candidatus Taylorbacteria bacterium RIFCSPLOWO2_02_50_13	0	0	0	0	0	0	0	0	0	0	0	0	0	0	0	0	1
Bacteria	Candidatus Taylorbacteria	NA	NA	NA	NA	Candidatus Taylorbacteria bacterium RIFCSPLOWO2_02_FULL_50_120	0	0	0	0	0	0	0	0	0	0	0	0	0	0	0	0	3
Bacteria	Candidatus Uhrbacteria	NA	NA	NA	NA	Candidatus Uhrbacteria bacterium GW2011_GWF2_40_263	0	0	0	0	0	0	0	0	0	0	0	0	0	0	0	0	6
Bacteria	Candidatus Wildermuthbacteria	NA	NA	NA	NA	Candidatus Wildermuthbacteria bacterium RIFCSPLOWO2_01_FULL_50_46	0	0	0	0	0	0	0	0	0	0	0	0	0	0	0	0	18
Bacteria	Candidatus Woesebacteria	NA	NA	NA	NA	Candidatus Woesebacteria bacterium RBG_16_42_24	0	0	0	0	0	0	0	0	0	0	0	0	0	0	0	0	24
Bacteria	Candidatus Woesebacteria	NA	NA	NA	NA	Candidatus Woesebacteria bacterium RIFCSPHIGHO2_12_FULL_42_9	0	0	0	0	0	0	0	0	0	0	0	0	0	0	0	0	2
Bacteria	Candidatus Woesebacteria	NA	NA	NA	NA	Candidatus Woesebacteria bacterium RIFOXYD1_FULL_33_11	0	0	0	0	0	0	0	0	0	0	0	0	0	0	0	0	31
Bacteria	Candidatus Zambryskibacteria	NA	NA	NA	NA	Candidatus Zambryskibacteria bacterium RIFCSPHIGHO2_01_FULL_46_25	0	0	0	0	0	0	0	0	0	0	0	0	0	0	0	0	13
Bacteria	Candidatus Zambryskibacteria	NA	NA	NA	NA	Candidatus Zambryskibacteria bacterium RIFCSPLOWO2_02_FULL_39_69	0	0	0	0	0	0	0	0	0	0	0	0	0	0	0	0	20
Bacteria	Candidatus Zambryskibacteria	NA	NA	NA	NA	Candidatus Zambryskibacteria bacterium RIFOXYD1_FULL_39_35	0	0	0	0	0	0	0	0	0	0	0	0	0	0	0	0	12
Bacteria	Chloroflexi	NA	NA	NA	NA	Chloroflexi bacterium 13_1_40CM_4_65_13	0	0	0	0	0	0	0	0	0	0	0	0	0	0	0	0	12
Bacteria	Chloroflexi	NA	NA	NA	NA	uncultured Chloroflexi bacterium Rifle_16ft_4_minimus_38099	0	0	0	0	0	0	0	0	0	0	0	0	0	0	0	0	56
Bacteria	Chloroflexi	NA	NA	NA	NA	uncultured Chloroflexi bacterium Rifle_16ft_4_minimus_38663	0	0	0	0	0	0	0	0	0	0	0	0	0	0	0	0	1
Bacteria	Chloroflexi	NA	NA	NA	NA	uncultured Chloroflexi bacterium Rifle_16ft_4_minimus_5165	0	0	0	0	0	0	0	0	0	0	0	0	0	0	0	0	22
Bacteria	Cyanobacteria	NA	NA	NA	NA	Cyanobacteria bacterium QS_4_48_99	0	0	0	0	0	0	0	0	0	0	0	0	0	0	0	0	1
Bacteria	Cyanobacteria	NA	Nostocales	Calotrichaceae	Calothrix	Calothrix sp. FACHB-168	0	0	0	0	0	0	0	0	0	0	0	0	0	0	0	0	24
Bacteria	Cyanobacteria	NA	Nostocales	Fortieaceae	Aulosira	Aulosira sp. FACHB-113	0	0	0	0	0	0	0	0	0	0	0	0	0	0	0	0	13
Bacteria	Cyanobacteria	NA	Synechococcales	Synechococcaceae	Synechococcus	Synechococcus sp. 63AY4M2	0	0	0	0	0	0	0	0	0	0	0	0	0	0	0	0	1
Bacteria	Cyanobacteria	NA	Synechococcales	Synechococcaceae	Synechococcus	Synechococcus sp. MIT S9504	0	0	0	0	0	0	0	0	0	0	0	0	0	0	0	0	3
Bacteria	Cyanobacteria	NA	Synechococcales	Synechococcaceae	Synechococcus	Synechococcus sp. RS9909	0	0	0	0	0	0	0	0	0	0	0	0	0	0	0	0	1
Bacteria	Deinococcus-Thermus	Deinococci	Thermales	Thermaceae	Thermus	Thermus sp. Rt41A	0	0	0	0	0	0	0	0	0	0	0	0	0	0	0	0	2
Bacteria	Dictyoglomi	Dictyoglomia	Dictyoglomales	Dictyoglomaceae	Dictyoglomus	uncultured Dictyoglomus sp.	0	0	0	0	0	0	0	0	0	0	0	0	0	0	0	0	21
Bacteria	Fibrobacteres	Fibrobacteria	Fibrobacterales	Fibrobacteraceae	Fibrobacter	Fibrobacter sp. UWB16	0	0	0	0	0	0	0	0	0	0	0	0	0	0	0	0	31
Bacteria	Firmicutes	Bacilli	Bacillales	Listeriaceae	Listeria	Listeria sp. FSL_L7-1699	0	0	0	0	0	0	0	0	0	0	0	0	0	0	0	0	1
Bacteria	Firmicutes	Bacilli	Bacillales	NA	Exiguobacterium	Exiguobacterium sp. JLM-2	0	0	0	0	0	0	0	0	0	0	0	0	0	0	0	0	26
Bacteria	Firmicutes	Clostridia	Clostridiales	Lachnospiraceae	Coprococcus	Coprococcus sp. OM06-34AC	0	0	0	0	0	0	0	0	0	0	0	0	0	0	0	0	34
Bacteria	Firmicutes	Clostridia	Clostridiales	Lachnospiraceae	Dorea	Dorea sp. CAG:105	0	0	0	0	0	0	0	0	0	0	0	0	0	0	0	0	32
Bacteria	Firmicutes	Clostridia	Clostridiales	Ruminococcaceae	Pseudoflavonifractor	Pseudoflavonifractor sp. BIOML-A14	0	0	0	0	0	0	0	0	0	0	0	0	0	0	0	0	1
Bacteria	Firmicutes	Erysipelotrichia	Erysipelotrichales	Coprobacillaceae	Coprobacillus	Coprobacillus sp. AM37-9BH	0	0	0	0	0	0	0	0	0	0	0	0	0	0	0	0	28
Bacteria	Firmicutes	Erysipelotrichia	Erysipelotrichales	Coprobacillaceae	Coprobacillus	Coprobacillus sp. CAG:235	0	0	0	0	0	0	0	0	0	0	0	0	0	0	0	0	1
Bacteria	Firmicutes	Erysipelotrichia	Erysipelotrichales	Erysipelotrichaceae	Erysipelothrix	Erysipelothrix sp. D17_0559-3-2-1	0	0	0	0	0	0	0	0	0	0	0	0	0	0	0	0	1
Bacteria	NA	NA	NA	NA	NA	Aplysina aerophoba bacterial symbiont clone AANRPS	0	0	0	0	0	0	0	0	0	0	0	0	0	0	0	0	8
Bacteria	NA	NA	NA	NA	NA	bacterium D16-59	0	0	0	0	0	0	0	0	0	0	0	0	0	0	0	0	19
Bacteria	NA	NA	NA	NA	NA	bacterium M00.F.Ca.ET.177.01.1.1	0	0	0	0	0	0	0	0	0	0	0	0	0	0	0	0	1
Bacteria	NA	NA	NA	NA	NA	Microgenomates group bacterium GW2011_GWC1_38_14	0	0	0	0	0	0	0	0	0	0	0	0	0	0	0	0	3
Bacteria	NA	NA	NA	NA	NA	Microgenomates group bacterium GW2011_GWC1_44_10	0	0	0	0	0	0	0	0	0	0	0	0	0	0	0	0	2
Bacteria	NA	NA	NA	NA	NA	Parcubacteria group bacterium CG_4_8_14_3_um_filter_48_16	0	0	0	0	0	0	0	0	0	0	0	0	0	0	0	0	3
Bacteria	NA	NA	NA	NA	NA	Parcubacteria group bacterium CG2_30_48_51	0	0	0	0	0	0	0	0	0	0	0	0	0	0	0	0	42
Bacteria	NA	NA	NA	NA	NA	Parcubacteria group bacterium GW2011_GWA2_42_35	0	0	0	0	0	0	0	0	0	0	0	0	0	0	0	0	5
Bacteria	NA	NA	NA	NA	NA	Parcubacteria group bacterium GW2011_GWA2_46_10	0	0	0	0	0	0	0	0	0	0	0	0	0	0	0	0	8
Bacteria	NA	NA	NA	NA	NA	Parcubacteria group bacterium GW2011_GWC1_38_22	0	0	0	0	0	0	0	0	0	0	0	0	0	0	0	0	25
Bacteria	NA	NA	NA	NA	NA	Parcubacteria group bacterium GW2011_GWF1_43_9	0	0	0	0	0	0	0	0	0	0	0	0	0	0	0	0	17
Bacteria	NA	NA	NA	NA	NA	Parcubacteria group bacterium GW2011_GWF2_45_11	0	0	0	0	0	0	0	0	0	0	0	0	0	0	0	0	21
Bacteria	NA	NA	NA	NA	NA	Parcubacteria group bacterium RIFCSPLOWO2_12_FULL_40_10	0	0	0	0	0	0	0	0	0	0	0	0	0	0	0	0	17
Bacteria	NA	NA	NA	NA	NA	Theonella swinhoei bacterial symbiont clone pSW1H8	0	0	0	0	0	0	0	0	0	0	0	0	0	0	0	0	3
Bacteria	NA	NA	NA	NA	NA	uncultured bacterium A1Q1_fos_1070	0	0	0	0	0	0	0	0	0	0	0	0	0	0	0	0	5
Bacteria	NA	NA	NA	NA	NA	uncultured bacterium Ad_142_N07	0	0	0	0	0	0	0	0	0	0	0	0	0	0	0	0	1
Bacteria	NA	NA	NA	NA	NA	uncultured bacterium Contig1625	0	0	0	0	0	0	0	0	0	0	0	0	0	0	0	0	42
Bacteria	NA	NA	NA	NA	NA	uncultured bacterium Contig4	0	0	0	0	0	0	0	0	0	0	0	0	0	0	0	0	1
Bacteria	NA	NA	NA	NA	NA	uncultured bacterium CSL1	0	0	0	0	0	0	0	0	0	0	0	0	0	0	0	0	8
Bacteria	NA	NA	NA	NA	NA	uncultured bacterium esnapd26	0	0	0	0	0	0	0	0	0	0	0	0	0	0	0	0	1
Bacteria	NA	NA	NA	NA	NA	uncultured bacterium HF770_09N20	0	0	0	0	0	0	0	0	0	0	0	0	0	0	0	0	1
Bacteria	NA	NA	NA	NA	NA	uncultured bacterium W4-21b	0	0	0	0	0	0	0	0	0	0	0	0	0	0	0	0	35
Bacteria	NA	NA	NA	NA	NA	uncultured marine bacterium 105	0	0	0	0	0	0	0	0	0	0	0	0	0	0	0	0	4
Bacteria	Nitrospirae	NA	NA	NA	NA	Nitrospirae bacterium RIFOXYC2_FULL_44_7	0	0	0	0	0	0	0	0	0	0	0	0	0	0	0	0	16
Bacteria	Nitrospirae	NA	NA	NA	NA	uncultured Nitrospirae bacterium Rifle_16ft_4_minimus_18822	0	0	0	0	0	0	0	0	0	0	0	0	0	0	0	0	1
Bacteria	Nitrospirae	Thermodesulfovibrionia	Thermodesulfovibrionales	Thermodesulfovibrionaceae	Thermodesulfovibrio	Thermodesulfovibrio yellowstonii	0	0	0	0	0	0	0	0	0	0	0	0	0	0	0	0	11
Bacteria	Planctomycetes	NA	NA	NA	NA	Planctomycetes bacterium RIFCSPHIGHO2_02_FULL_50_42	0	0	0	0	0	0	0	0	0	0	0	0	0	0	0	0	2
Bacteria	Proteobacteria	Alphaproteobacteria	NA	NA	NA	Alphaproteobacteria bacterium MarineAlpha6_Bin3	0	0	0	0	0	0	0	0	0	0	0	0	0	0	0	0	53
Bacteria	Proteobacteria	Alphaproteobacteria	Rhizobiales	Brucellaceae	Brucella	Brucella sp. 10RB9210	0	0	0	0	0	0	0	0	0	0	0	0	0	0	0	0	1
Bacteria	Proteobacteria	Alphaproteobacteria	Rhizobiales	Hyphomicrobiaceae	Pelagibacterium	Pelagibacterium sp. SCN 63-17	0	0	0	0	0	0	0	0	0	0	0	0	0	0	0	0	18
Bacteria	Proteobacteria	Alphaproteobacteria	Rhizobiales	Phyllobacteriaceae	Aminobacter	Aminobacter sp. J41	0	0	0	0	0	0	0	0	0	0	0	0	0	0	0	0	1
Bacteria	Proteobacteria	Alphaproteobacteria	Rhizobiales	Rhizobiaceae	Ensifer	Ensifer sp. ENS03	0	0	0	0	0	0	0	0	0	0	0	0	0	0	0	0	1
Bacteria	Proteobacteria	Alphaproteobacteria	Rickettsiales	Anaplasmataceae	Wolbachia	Wolbachia endosymbiont of Nomada ferruginata	0	0	0	0	0	0	0	0	0	0	0	0	0	0	0	0	1
Bacteria	Proteobacteria	Alphaproteobacteria	Sphingomonadales	Sphingomonadaceae	Blastomonas	Blastomonas sp. CCH6-A6	0	0	0	0	0	0	0	0	0	0	0	0	0	0	0	0	1
Bacteria	Proteobacteria	Betaproteobacteria	Burkholderiales	Burkholderiaceae	Polynucleobacter	Polynucleobacter sp. 35-46-11	0	0	0	0	0	0	0	0	0	0	0	0	0	0	0	0	80
Bacteria	Proteobacteria	Betaproteobacteria	Burkholderiales	NA	NA	Burkholderiales bacterium GWE1_65_30	0	0	0	0	0	0	0	0	0	0	0	0	0	0	0	0	1
Bacteria	Proteobacteria	Candidatus Muproteobacteria	NA	NA	NA	Candidatus Muproteobacteria bacterium RIFCSPHIGHO2_02_FULL_60_13	0	0	0	0	0	0	0	0	0	0	0	0	0	0	0	0	1
Bacteria	Proteobacteria	Deltaproteobacteria	NA	NA	Desulfocaldus	Desulfocaldus sp. Hobo	0	0	0	0	0	0	0	0	0	0	0	0	0	0	0	0	51
Bacteria	Proteobacteria	Deltaproteobacteria	NA	NA	NA	Deltaproteobacteria bacterium RIFCSPLOWO2_12_FULL_38_8	0	0	0	0	0	0	0	0	0	0	0	0	0	0	0	0	36
Bacteria	Proteobacteria	Epsilonproteobacteria	Campylobacterales	Campylobacteraceae	Poseidonibacter	Poseidonibacter sp. SJOD-M-33	0	0	0	0	0	0	0	0	0	0	0	0	0	0	0	0	1
Bacteria	Proteobacteria	Gammaproteobacteria	Alteromonadales	Idiomarinaceae	Pseudidiomarina	Pseudidiomarina marina	0	0	0	0	0	0	0	0	0	0	0	0	0	0	0	0	1
Bacteria	Proteobacteria	Gammaproteobacteria	Alteromonadales	Pseudoalteromonadaceae	Pseudoalteromonas	Pseudoalteromonas sp. 3D05	0	0	0	0	0	0	0	0	0	0	0	0	0	0	0	0	1
Bacteria	Proteobacteria	Gammaproteobacteria	Alteromonadales	Pseudoalteromonadaceae	Pseudoalteromonas	Pseudoalteromonas sp. 5Ae-yellow	0	0	0	0	0	0	0	0	0	0	0	0	0	0	0	0	20
Bacteria	Proteobacteria	Gammaproteobacteria	Alteromonadales	Pseudoalteromonadaceae	Pseudoalteromonas	Pseudoalteromonas sp. UCD-33C	0	0	0	0	0	0	0	0	0	0	0	0	0	0	0	0	2
Bacteria	Proteobacteria	Gammaproteobacteria	Alteromonadales	Psychromonadaceae	Psychromonas	Psychromonas sp. SR45-3	0	0	0	0	0	0	0	0	0	0	0	0	0	0	0	0	1
Bacteria	Proteobacteria	Gammaproteobacteria	Chromatiales	Ectothiorhodospiraceae	Thioalkalivibrio	Thioalkalivibrio sp. K90mix	0	0	0	0	0	0	0	0	0	0	0	0	0	0	0	0	72
Bacteria	Proteobacteria	Gammaproteobacteria	Enterobacterales	Enterobacteriaceae	Citrobacter	Citrobacter sp. RHBSTW-01044	0	0	0	0	0	0	0	0	0	0	0	0	0	0	0	0	1
Bacteria	Proteobacteria	Gammaproteobacteria	Enterobacterales	Erwiniaceae	Pantoea	Pantoea sp. B_10	0	0	0	0	0	0	0	0	0	0	0	0	0	0	0	0	3
Bacteria	Proteobacteria	Gammaproteobacteria	Enterobacterales	Erwiniaceae	Pantoea	Pantoea sp. MBLJ3	0	0	0	0	0	0	0	0	0	0	0	0	0	0	0	0	3
Bacteria	Proteobacteria	Hydrogenophilalia	Hydrogenophilales	NA	NA	Hydrogenophilales bacterium 16-61-112	0	0	0	0	0	0	0	0	0	0	0	0	0	0	0	0	48
Bacteria	Proteobacteria	NA	NA	NA	NA	uncultured proteobacterium QS1	0	0	0	0	0	0	0	0	0	0	0	0	0	0	0	0	16
Bacteria	Spirochaetes	NA	NA	NA	NA	Spirochaetes bacterium GWC1_27_15	0	0	0	0	0	0	0	0	0	0	0	0	0	0	0	0	18
Bacteria	Tenericutes	Mollicutes	Entomoplasmatales	Spiroplasmataceae	Spiroplasma	Spiroplasma sp. ChiS	0	0	0	0	0	0	0	0	0	0	0	0	0	0	0	0	1
Bacteria	Verrucomicrobia	Opitutae	Puniceicoccales	Puniceicoccaceae	Coraliomargarita	uncultured Coraliomargarita sp.	0	0	0	0	0	0	0	0	0	0	0	0	0	0	0	0	1
Bacteria	Verrucomicrobia	Verrucomicrobiae	Verrucomicrobiales	NA	NA	uncultured Verrucomicrobiales bacterium	0	0	0	0	0	0	0	0	0	0	0	0	0	0	0	0	11
Eukaryota	Apicomplexa	Aconoidasida	Piroplasmida	Theileriidae	Theileria	Theileria cervi	0	0	0	0	0	0	0	0	0	0	0	0	0	0	0	0	10
Eukaryota	Apicomplexa	Aconoidasida	Piroplasmida	Theileriidae	Theileria	Theileria sp. China	0	0	0	0	0	0	0	0	0	0	0	0	0	0	0	0	1
Eukaryota	Ascomycota	Dothideomycetes	Cladosporiales	Cladosporiaceae	Cladosporium	Cladosporium bruhnei	0	0	0	0	0	0	0	0	0	0	0	0	0	0	0	0	2
Eukaryota	Ascomycota	Eurotiomycetes	Eurotiales	Aspergillaceae	NA	uncultured Aspergillus	0	0	0	0	0	0	0	0	0	0	0	0	0	0	0	0	24
Eukaryota	Ascomycota	Eurotiomycetes	Eurotiales	Aspergillaceae	Penicillium	Penicillium paneum	0	0	0	0	0	0	0	0	0	0	0	0	0	0	0	0	20
Eukaryota	Ascomycota	Lecanoromycetes	Ostropales	Stictidaceae	Cryptodiscus	Cryptodiscus foveolaris	0	0	0	0	0	0	0	0	0	0	0	0	0	0	0	0	1
Eukaryota	Ascomycota	Saccharomycetes	Saccharomycetales	Dipodascaceae	Yarrowia	Yarrowia galli	0	0	0	0	0	0	0	0	0	0	0	0	0	0	0	0	1
Eukaryota	Ascomycota	Sordariomycetes	Glomerellales	Glomerellaceae	Colletotrichum	Colletotrichum gossypii	0	0	0	0	0	0	0	0	0	0	0	0	0	0	0	0	8
Eukaryota	Ascomycota	Sordariomycetes	Hypocreales	Nectriaceae	Fusarium	Fusarium commune	0	0	0	0	0	0	0	0	0	0	0	0	0	0	0	0	1
Eukaryota	Ascomycota	Sordariomycetes	Microascales	Ceratocystidaceae	Huntiella	Huntiella omanensis	0	0	0	0	0	0	0	0	0	0	0	0	0	0	0	0	1
Eukaryota	Ascomycota	Sordariomycetes	Sordariales	Sordariaceae	Sordaria	Sordaria fimicola	0	0	0	0	0	0	0	0	0	0	0	0	0	0	0	0	1
Eukaryota	Bacillariophyta	Bacillariophyceae	Bacillariales	Bacillariaceae	Nitzschia	Nitzschia frustulum	0	0	0	0	0	0	0	0	0	0	0	0	0	0	0	0	49
Eukaryota	Bacillariophyta	Bacillariophyceae	Surirellales	Surirellaceae	Surirella	Surirella sp.	0	0	0	0	0	0	0	0	0	0	0	0	0	0	0	0	28
Eukaryota	Bacillariophyta	Coscinodiscophyceae	Thalassiosirales	Skeletonemataceae	Skeletonema	Skeletonema pseudocostatum	0	0	0	0	0	0	0	0	0	0	0	0	0	0	0	0	1
Eukaryota	Bacillariophyta	Mediophyceae	Toxariales	Toxariaceae	Toxarium	Toxarium undulatum	0	0	0	0	0	0	0	0	0	0	0	0	0	0	0	0	1
Eukaryota	Basidiomycota	Agaricomycetes	Russulales	Russulaceae	Russula	Russula sp.	0	0	0	0	0	0	0	0	0	0	0	0	0	0	0	0	1
Eukaryota	Cercozoa	Chlorarachniophyceae	NA	NA	Lotharella	Lotharella globosa	0	0	0	0	0	0	0	0	0	0	0	0	0	0	0	0	34
Eukaryota	Chlorophyta	Chlorophyceae	Chaetopeltidales	Chaetopeltidaceae	Floydiella	Floydiella terrestris	0	0	0	0	0	0	0	0	0	0	0	0	0	0	0	0	1
Eukaryota	Chlorophyta	Chlorophyceae	Chlamydomonadales	Chlamydomonadaceae	Carteria	Carteria lunzensis	0	0	0	0	0	0	0	0	0	0	0	0	0	0	0	0	1
Eukaryota	Chlorophyta	Chlorophyceae	Sphaeropleales	Scenedesmaceae	Chodatodesmus	Chodatodesmus australis	0	0	0	0	0	0	0	0	0	0	0	0	0	0	0	0	18
Eukaryota	Chlorophyta	Trebouxiophyceae	Chlorellales	Chlorellaceae	Nannochloris	Nannochloris bacillaris	0	0	0	0	0	0	0	0	0	0	0	0	0	0	0	0	5
Eukaryota	Chlorophyta	Trebouxiophyceae	Chlorellales	Leptosiraceae	Pseudopleurococcus	Pseudopleurococcus sp. A SAG 2039	0	0	0	0	0	0	0	0	0	0	0	0	0	0	0	0	27
Eukaryota	Chlorophyta	Ulvophyceae	Bryopsidales	Caulerpaceae	Caulerpa	Caulerpa racemosa	0	0	0	0	0	0	0	0	0	0	0	0	0	0	0	0	25
Eukaryota	Chlorophyta	Ulvophyceae	Bryopsidales	Halimedaceae	Pseudocodium	Pseudocodium devriesii	0	0	0	0	0	0	0	0	0	0	0	0	0	0	0	0	1
Eukaryota	Chlorophyta	Ulvophyceae	Ulotrichales	Ulotrichaceae	Ulothrix	Ulothrix zonata	0	0	0	0	0	0	0	0	0	0	0	0	0	0	0	0	34
Eukaryota	Chlorophyta	Ulvophyceae	Ulvales	Ulvaceae	Ulva	Ulva gigantea	0	0	0	0	0	0	0	0	0	0	0	0	0	0	0	0	1
Eukaryota	Chytridiomycota	Chytridiomycetes	Rhizophydiales	Rhizophydiaceae	Rhizophydium	Rhizophydium sp. JEL138	0	0	0	0	0	0	0	0	0	0	0	0	0	0	0	0	16
Eukaryota	Chytridiomycota	Monoblepharidomycetes	Monoblepharidales	Monoblepharidaceae	Monoblepharella	Monoblepharella sp. JEL15	0	0	0	0	0	0	0	0	0	0	0	0	0	0	0	0	25
Eukaryota	Chytridiomycota	Neocallimastigomycetes	Neocallimastigales	Neocallimastigaceae	Neocallimastix	Neocallimastix cameroonii	0	0	0	0	0	0	0	0	0	0	0	0	0	0	0	0	14
Eukaryota	Endomyxa	Ascetosporea	Haplosporida	Haplosporidiidae	Minchinia	Minchinia chitonis	0	0	0	0	0	0	0	0	0	0	0	0	0	0	0	0	1
Eukaryota	Endomyxa	NA	Vampyrellida	Leptophryidae	Leptophrys	Leptophrys sp. 1 LAK-2013	0	0	0	0	0	0	0	0	0	0	0	0	0	0	0	0	1
Eukaryota	Euglenozoa	Euglenida	Heteronematales	Peranemataceae	Entosiphon	Entosiphon sp.	0	0	0	0	0	0	0	0	0	0	0	0	0	0	0	0	23
Eukaryota	Evosea	Variosea	NA	Flamellidae	Telaepolella	Telaepolella tubasferens	0	0	0	0	0	0	0	0	0	0	0	0	0	0	0	0	1
Eukaryota	Haptista	Haptophyta	Coccolithales	Calcidiscaceae	Calcidiscus	Calcidiscus leptoporus	0	0	0	0	0	0	0	0	0	0	0	0	0	0	0	0	1
Eukaryota	Heterolobosea	NA	NA	Psalteriomonadidae	Pseudoharpagon	Pseudoharpagon pertyi	0	0	0	0	0	0	0	0	0	0	0	0	0	0	0	0	1
Eukaryota	NA	Chrysophyceae	Chromulinales	Chromulinaceae	Spumella	Spumella uniguttata	0	0	0	0	0	0	0	0	0	0	0	0	0	0	0	0	1
Eukaryota	NA	Dinophyceae	Gymnodiniales	Gymnodiniaceae	Lepidodinium	Lepidodinium chlorophorum	0	0	0	0	0	0	0	0	0	0	0	0	0	0	0	0	1
Eukaryota	NA	Eustigmatophyceae	Eustigmatales	Eustigmataceae	Vischeria	Vischeria sp. CAUP Q 202	0	0	0	0	0	0	0	0	0	0	0	0	0	0	0	0	1
Eukaryota	NA	Phaeophyceae	Laminariales	Pseudochordaceae	Pseudochorda	Pseudochorda nagaii	0	0	0	0	0	0	0	0	0	0	0	0	0	0	0	0	1
Eukaryota	NA	Phaeophyceae	Sphacelariales	Cladostephaceae	Cladostephus	Cladostephus spongiosus	0	0	0	0	0	0	0	0	0	0	0	0	0	0	0	0	1
Eukaryota	Rhodophyta	Compsopogonophyceae	Rhodochaetales	Rhodochaetaceae	Rhodochaete	Rhodochaete parvula	0	0	0	0	0	0	0	0	0	0	0	0	0	0	0	0	35
Eukaryota	Rhodophyta	Florideophyceae	Ceramiales	Rhodomelaceae	Polysiphonia	Polysiphonia stricta	0	0	0	0	0	0	0	0	0	0	0	0	0	0	0	0	1
Eukaryota	Rhodophyta	Florideophyceae	Ceramiales	Rhodomelaceae	Sonderella	Sonderella linearis	0	0	0	0	0	0	0	0	0	0	0	0	0	0	0	0	5
Eukaryota	Rhodophyta	Florideophyceae	Gelidiales	Gelidiaceae	Gelidium	Gelidium vagum	0	0	0	0	0	0	0	0	0	0	0	0	0	0	0	0	22
Eukaryota	Rhodophyta	Florideophyceae	Gracilariales	Gracilariaceae	Gracilaria	Gracilaria textorii	0	0	0	0	0	0	0	0	0	0	0	0	0	0	0	0	1
Viruses	Cossaviricota	Papovaviricetes	Zurhausenvirales	Papillomaviridae	Betapapillomavirus	Betapapillomavirus 6	0	0	0	0	0	0	0	0	0	0	0	0	0	0	0	0	19
Viruses	Cossaviricota	Papovaviricetes	Zurhausenvirales	Papillomaviridae	NA	Rodent papillomavirus	0	0	0	0	0	0	0	0	0	0	0	0	0	0	0	0	1
Viruses	Cossaviricota	Quintoviricetes	Piccovirales	Parvoviridae	Protoparvovirus	Parvovirus 4-like MK-2012	0	0	0	0	0	0	0	0	0	0	0	0	0	0	0	0	1
Viruses	Duplornaviricota	Resentoviricetes	Reovirales	Reoviridae	Aquareovirus	Hirame reovirus	0	0	0	0	0	0	0	0	0	0	0	0	0	0	0	0	1
Viruses	Duplornaviricota	Resentoviricetes	Reovirales	Reoviridae	Coltivirus	Colorado tick fever coltivirus	0	0	0	0	0	0	0	0	0	0	0	0	0	0	0	0	1
Viruses	Duplornaviricota	Resentoviricetes	Reovirales	Reoviridae	Fijivirus	Rice black streaked dwarf virus	0	0	0	0	0	0	0	0	0	0	0	0	0	0	0	0	1
Viruses	Duplornaviricota	Resentoviricetes	Reovirales	Reoviridae	Orbivirus	African horse sickness virus	0	0	0	0	0	0	0	0	0	0	0	0	0	0	0	0	1
Viruses	Kitrinoviricota	Alsuviricetes	Hepelivirales	Matonaviridae	Rubivirus	Ruhugu virus	0	0	0	0	0	0	0	0	0	0	0	0	0	0	0	0	1
Viruses	Kitrinoviricota	Alsuviricetes	Tymovirales	Betaflexiviridae	Carlavirus	Shallot latent virus	0	0	0	0	0	0	0	0	0	0	0	0	0	0	0	0	1
Viruses	Kitrinoviricota	Alsuviricetes	Tymovirales	Betaflexiviridae	Robigovirus	Cherry necrotic rusty mottle virus	0	0	0	0	0	0	0	0	0	0	0	0	0	0	0	0	1
Viruses	Kitrinoviricota	Alsuviricetes	Tymovirales	Tymoviridae	Tymovirus	Nemesia ring necrosis virus	0	0	0	0	0	0	0	0	0	0	0	0	0	0	0	0	2
Viruses	Kitrinoviricota	Alsuviricetes	Tymovirales	Tymoviridae	Tymovirus	Plantago mottle virus	0	0	0	0	0	0	0	0	0	0	0	0	0	0	0	0	2
Viruses	Kitrinoviricota	Flasuviricetes	Amarillovirales	Flaviviridae	NA	Firefly squid flavivirus	0	0	0	0	0	0	0	0	0	0	0	0	0	0	0	0	1
Viruses	Kitrinoviricota	Flasuviricetes	Amarillovirales	Flaviviridae	NA	Mogiana tick virus	0	0	0	0	0	0	0	0	0	0	0	0	0	0	0	0	1
Viruses	Kitrinoviricota	Flasuviricetes	Amarillovirales	Flaviviridae	NA	NA	0	0	0	0	0	0	0	0	0	0	0	0	0	0	0	0	2
Viruses	Kitrinoviricota	Tolucaviricetes	Tolivirales	Luteoviridae	NA	Almond luteovirus 1	0	0	0	0	0	0	0	0	0	0	0	0	0	0	0	0	13
Viruses	Kitrinoviricota	Tolucaviricetes	Tolivirales	Luteoviridae	Polerovirus	Chickpea chlorotic stunt virus	0	0	0	0	0	0	0	0	0	0	0	0	0	0	0	0	1
Viruses	NA	NA	NA	Baculoviridae	Alphabaculovirus	Condylorrhiza vestigialis MNPV	0	0	0	0	0	0	0	0	0	0	0	0	0	0	0	0	1
Viruses	NA	NA	NA	Baculoviridae	Alphabaculovirus	Oxyplax ochracea nucleopolyhedrovirus	0	0	0	0	0	0	0	0	0	0	0	0	0	0	0	0	1
Viruses	NA	NA	NA	NA	NA	Beihai picorna-like virus 37	0	0	0	0	0	0	0	0	0	0	0	0	0	0	0	0	1
Viruses	NA	NA	NA	NA	NA	Beihai sipunculid worm virus 5	0	0	0	0	0	0	0	0	0	0	0	0	0	0	0	0	1
Viruses	NA	NA	NA	NA	NA	environmental Halophage eHP-2	0	0	0	0	0	0	0	0	0	0	0	0	0	0	0	0	30
Viruses	NA	NA	NA	NA	NA	Halovirus HHTV-2	0	0	0	0	0	0	0	0	0	0	0	0	0	0	0	0	1
Viruses	NA	NA	NA	NA	NA	Skeletonema virus LDF-2015a	0	0	0	0	0	0	0	0	0	0	0	0	0	0	0	0	31
Viruses	NA	NA	NA	NA	NA	Streptococcus satellite phage Javan341	0	0	0	0	0	0	0	0	0	0	0	0	0	0	0	0	17
Viruses	NA	NA	NA	NA	NA	Trichoderma harzianum ambiguivirus 1	0	0	0	0	0	0	0	0	0	0	0	0	0	0	0	0	1
Viruses	NA	NA	NA	NA	NA	Wuhan house centipede virus 4	0	0	0	0	0	0	0	0	0	0	0	0	0	0	0	0	4
Viruses	NA	NA	NA	NA	NA	Wuhan insect virus 21	0	0	0	0	0	0	0	0	0	0	0	0	0	0	0	0	38
Viruses	NA	NA	NA	Polydnaviridae	Ichnovirus	Tranosema rostrale ichnovirus	0	0	0	0	0	0	0	0	0	0	0	0	0	0	0	0	35
Viruses	Negarnaviricota	Monjiviricetes	Jingchuvirales	Chuviridae	Mivirus	Brunnich mivirus	0	0	0	0	0	0	0	0	0	0	0	0	0	0	0	0	1
Viruses	Negarnaviricota	Monjiviricetes	Mononegavirales	Rhabdoviridae	NA	Wuhan House Fly Virus 2	0	0	0	0	0	0	0	0	0	0	0	0	0	0	0	0	28
Viruses	Negarnaviricota	Monjiviricetes	Mononegavirales	Rhabdoviridae	NA	Wuhan Mosquito Virus 9	0	0	0	0	0	0	0	0	0	0	0	0	0	0	0	0	24
Viruses	Nucleocytoviricota	Megaviricetes	Algavirales	Phycodnaviridae	Coccolithovirus	Emiliania huxleyi virus 84	0	0	0	0	0	0	0	0	0	0	0	0	0	0	0	0	1
Viruses	Nucleocytoviricota	Megaviricetes	Algavirales	Phycodnaviridae	Prasinovirus	Micromonas pusilla virus SP1 sensu lato	0	0	0	0	0	0	0	0	0	0	0	0	0	0	0	0	1
[truncated: 3,283 more rows]

## Sheet: Suppl. Table 6
Supplementary Table 6 List of species in Solfatara and Pisciarelli after contaminants, singletons, species occuring in only one sample and low abundance species (< 0.01 %) were removed from taxonomy table generated from metagenomic profiling. Samples collected from Pisciarelli large pool are denoted by PLP, Pisciarelli small pool by PSP, Pisciarelli fumarole by PF, Solfatara mud pool by SMP, and …
[truncated: 492 more rows]

[truncated: 6 more sheets: Suppl.Table 7, Suppl. Table 8, Suppl. Table 9, Suppl. Table 10, Suppl. Table 11, Suppl. Table 12]
